# Supplementary material for: Multicolor fate mapping of microglia reveals polyclonal proliferation, heterogeneity, and cell-cell interactions after ischemic stroke in mice
Source: Springer Nature journal article supplement (doi:10.1038/s41467-025-63949-3), 2025-09-16
Supplement: MOESM2 [file 41467_2025_63949_MOESM2_ESM.pdf › 25713suppl/41467_2025_63949_MOESM2_ESM.pdf]

### **Description of Additional Supplementary Files**

Supplementary Movie 1: 3D rendering of microglial cell-cell interaction related to Fig. 6a.

Supplementary Movie 2: Live-cell imaging of microglial process-soma interaction in acute brain slices. Related to Fig. 6c.

Supplementary Movie 3: Live-cell imaging of microglial process-process interaction in acute brain slices. Related to Supplementary Fig. 9a.

Supplementary Movie 4: Live-cell imaging of microglial flat soma-soma interaction in acute brain slices. Related to Supplementary Fig. 9b.

Supplementary Movie 5: Live-cell imaging of microglial entangled soma-soma interactions in acute brain slices. Related to Supplementary Fig. 9c.
