# Supplementary material for: Multicolor fate mapping of microglia reveals polyclonal proliferation, heterogeneity, and cell-cell interactions after ischemic stroke in mice
Source: Nat Commun. 2025 Sep 16;16:8294. doi: 10.1038/s41467-025-63949-3 (PMC12441135; doi:10.1038/s41467-025-63949-3)
Supplement: Supplementary file 10 — Source Data [file 41467_2025_63949_MOESM10_ESM.xlsx]

## Sheet: Fig. 1
		Fig. 1e (Density of Confeftti+ microglia)
		Contralateral								Stroke
	2d	1280.81	1504.35	1090.63	3165.56	1325.24	1876.58	1489.52	4557.46	2542	3197.82	1895.72	5384.41	3007.49	3265.57	2400.29	7290.37
	1w	1089.04	1090.04	1470.68	1738.44	1493.78	1446.1	1978.1	2445.06	3517.52	4001.77	11208.7	16426.7	12493.1	10639.5	19781	12877.8
	2w	1252.55	1813.72	1952.03	2368.9	2119.13	2028.79	2433.45		9258.69	12522.6	17846.4	9242.33	21346.7	15580.9	21659.8
	4w	2361.99	1027.02	656.836	1560.75	2027.87	1538.77	1687.43		13227.4	5544.38	7206.8	9901.55	18439.9	11644.8	14537.5
	8w	1711.52	513.082	997.627	1568.49	1640.67	1097.26	2179.38		2918.44	4118.46	8013.37	6017.05	4053.6	5511.01	8563.5
	12w	356.695	183.081	2134.99	1594.25	2555.18	1313.9			489.467	546.318	10509.4	3296.01	2814.99	2891.13

## Sheet: Fig. 2
		Fig. 2e (Density of clones of Confeftti+ microglia)																		For the Monte Carlo Simulation in Fig. 2c, please check the GitHub and the OSF repos (links in the manuscript)
		Contralateral								Stroke
	2d	113.275	116.649	89.3357	325.691	112.388	162.463	273.373	555.63	389.403	489.057	309.706	1155.53	435.731	349.467	459.248	1249.84
	1w	33.5472	55.082	106.032	151.462	105.447	81.681	136.137	192.592	739.467	900.661	2369.28	3088.89	2973.85	2245.57	3328.11	2526.63
	2w	73.1519	116.514	172.244	104.638	130.909	145.561	184.78		1771.16	2444.13	2192.18	1710.24	3019.21	2707.01	3540.6
	4w	298.382	70.2016	58.2253	105.227	142.968	66.293	108.662		1689.58	1122.86	1203.86	1634.21	2125.46	1594.75	1814.19
	8w	104.706	4.69776	46.5798	102.68	135.732	69.458	182.02		518.137	774.272	1504.37	1066.41	799.801	828.226	1027.92
	12w	16.8388	4.93265	169.7	116.411	205.117	91.571			54.3673	62.9901	1704.15	592.801	479.906	545.391
		Fig. 2f (Number of cells per clone [clone size])
		Contralateral								Stroke
	2d	2	2.18182	2.05556	2.14286	2.22727	2.12	2.28571	2.15842	2.22222	2.17442	2.41935	2.50649	2.28283	2.27586	2.31765	2.37104
	1w	2.28571	2.1	2.09091	2.10345	2.26667	2.13333	2.12	2.225	2.94444	2.81313	3.8289	4.4273	3.17753	3.91518	5.2303	4.2201
	2w	2.07692	2.04167	2.16216	2.26667	2.09524	2	2		4.3475	4.22222	7.29412	4.25077	6.34013	4.92402	5.41345
	4w	2.32308	2.14286	2	2.04	2.10714	2	2		6.95366	3.97318	4.97436	4.93333	7.79215	6.44272	7.16418
	8w	2.28571	2	2	2.0625	2.15385	2	2.18421		3.14151	3.58683	4.06977	3.33333	2.96795	5.1	7.01215
	12w	2	2	2.0625	2.04762	2.14634	2			2.8	2.42857	4.89801	3.54237	2.48485	2.30275

## Sheet: Fig. 3
	Fig. 3b (IV-curves - contralateral)
	mV	-20																															-70
	-170	-125.61	-96.13	-65.62	-122.26	-66.1	-62.59	-113.1	-123.59	-60.4	-83.74	-92.73	-64.39	-93.31	-99.3	-115.9	-71.53	-71.79	-87.07	-49.46	-148.63	-61.06	-87.97	-313.25	-134.66	-55.07	-89.1						-119	-87.47	-25.47	-139.67	-68.67	-84.99	-141.24	-140.77	-68.72	-98.61	-67.9	-92.48	-101.09	-116.52	-51.28	-74.26	-99.15
	-160	-119.09	-96.24	-58	-126.75	-76.01	-53.55	-111.75	-114.24	-72.07	-93.57	-97.86	-64.61	-121.52	-97.82	-128.93	-95.52	-75.2	-97.89	-58.49	-152.45	-66.16	-91.7	-363.28	-123.23	-61.07	-94.72						-112.18	-72.4	-27.21	-152.47	-76.11	-69.92	-165.71	-134.44	-78.64	-95.63	-65.88	-99.43	-99.93	-147.84	-48.27	-77.19	-89.7
	-150	-111.22	-97.47	-59.4	-116.85	-81.39	-55.42	-107.17	-104.87	-83.14	-111.05	-97.32	-65.28	-108.69	-84.42	-148.77	-64.52	-83.27	-102.01	-54.55	-146.6	-65.5	-83.31	-281.58	-125.01	-72.19	-94.65						-102.73	-78.98	-29.49	-155.17	-78.81	-57.74	-173.34	-121.28	-94.05	-104.33	-64.34	-119.49	-88.85	-157.23	-46.46	-75.57	-95.52
	-140	-101.36	-87.51	-58.14	-117.12	-83.01	-49.69	-99.7	-95.43	-84.71	-109.3	-95.55	-71.25	-108.87	-71.16	-153.43	-60.38	-70.07	-91.55	-64.95	-139.13	-67.9	-73.87	-151.61	-102.65	-70.71	-91.33						-94.01	-67.49	-29.25	-147.91	-82.65	-53.13	-136.25	-111.29	-98.25	-102.45	-64.93	-111.58	-76.59	-167.96	-43.82	-67.3	-87.84
	-130	-86.96	-78.28	-54.34	-110.81	-76.16	-45.66	-89.29	-86.68	-83.37	-100.45	-87.57	-74.18	-95.66	-54.55	-148.26	-56.42	-66.26	-79.99	-54.39	-121.9	-61.19	-66.59	-120.69	-96	-66.55	-83.18						-82.13	-55.83	-26.14	-135.43	-80.26	-46.92	-142.76	-92.94	-88.17	-91.58	-66.02	-103	-57.51	-156.3	-41.13	-69.33	-77.63
	-120	-75.23	-69.37	-48.34	-102.27	-66.4	-44.14	-81.72	-76.54	-68.52	-86.61	-74.8	-74.2	-83.43	-36.97	-126.34	-51.19	-55.86	-67.74	-45.5	-103.62	-51.95	-55.53	-109.2	-83.02	-57.27	-69.79						-73.86	-49.64	-23.2	-119.42	-71.09	-44.15	-132.51	-87.29	-75.92	-80.46	-64.5	-84.59	-38.94	-133.77	-37.28	-60.29	-65.42
	-110	-62.27	-61.91	-41.66	-75.87	-53.98	-36.82	-69.14	-67.57	-51.17	-67	-62.62	-67.36	-65.33	-25.28	-93.02	-46.69	-50.38	-52.4	-34.87	-83.41	-40.24	-46.52	-87.85	-65.35	-43.48	-54.56						-55.34	-38.41	-17.42	-98.94	-55.96	-38.11	-72.36	-74.82	-57.8	-64.03	-58.93	-64.19	-25.44	-101.45	-34.91	-39.57	-50.23
	-100	-47.59	-50.56	-34.41	-69.49	-37.39	-31.67	-58.73	-58.21	-33.36	-43.58	-43.93	-54.87	-45.09	-17.94	-58.84	-42.57	-41.18	-35.69	-25.35	-62.51	-31.48	-37.16	-58.95	-48.02	-29.84	-37.57						-42.49	-34	-11.92	-75.18	-38.63	-32.07	-58.71	-65.25	-37.43	-47.44	-47.86	-42.18	-18.08	-65.4	-31.38	-31.89	-33.19
	-90	-36.44	-41.49	-27.11	-50.04	-25.45	-26.55	-48.46	-49.53	-19.24	-23.27	-32.34	-38.52	-25.78	-12.73	-32.86	-38.45	-29.73	-20.81	-17.93	-45.68	-22.73	-28.97	-42.37	-31.04	-17.26	-22.89						-31.05	-28.94	-7	-55.1	-25.37	-24.87	-48.65	-54.97	-17.05	-32.53	-36.34	-23.71	-11.17	-37.3	-27.8	-20.19	-17.57
	-80	-28.77	-33.56	-21.51	-38.74	-17.87	-22.31	-41.63	-42.74	-10.67	-13.42	-23.4	-27.4	-17.48	-79.87	-17.98	-34.31	-22.12	-12.43	-12.83	-35.23	-17.04	-22.08	-24.84	-21.82	-10.93	-14.66						-23.52	-23.64	-31.66	-41.93	-17.23	-21.33	-40.15	-47.89	-94.91	-24.51	-27	-14.22	-61.27	-21.57	-25.01	-14.82	-96.65
	-70	-22.76	-27.84	-16.72	-30.15	-13.7	-18.55	-34.07	-34.75	-58.3	-90.93	-16.82	-19.52	-11.53	-29.53	-98.63	-29.84	-19.54	-95.17	-90.08	-27.6	-62.18	-17	-15.63	-15.52	-73.31	-94.4						-19.69	-20.16	-12.21	-36.28	-12.26	-16.3	-33.88	-39.33	-41.63	-18.11	-19.73	-99.07	22.77	-10.3	-21.65	-81.43	-63.87
	-60	-17.04	-22.76	-12.42	-21.22	-10.68	-17.22	-28.68	-27.99	-28.78	-56.15	-11.85	-13.16	-82.19	17.27	-28.06	-25.89	-17.45	-39	-62.38	-21.61	-9.48	-12.54	-12.04	-12.3	-44.82	-53.87						-18.34	-15.71	10.19	-28.47	-78.44	-12.86	-27.09	-31.14	-10.05	-12.84	-13.59	-66.73	60.33	-24.52	-18.68	-59	-30.66
	-50	-11.21	-18.26	-82.86	-13.68	-74.44	-11.96	-22.85	-21.07	0.53	-26.12	-74.89	-7.04	-56.16	56.14	34.52	-21.42	-10.54	-18.78	-34.98	-16.08	-46.41	-76.76	-64.29	-78.55	-19.37	-0.95						-72.61	-11.61	32.42	-21.68	-49.02	-95.07	-21.02	-22.7	15.7	-80.63	-70.91	-44.5	86.97	48.46	-15.04	-31.75	-11.85
	-40	-64.28	-13.6	-42.79	-12.13	-38.57	-86.68	-17.28	-13.26	36.69	1.15	-27.22	-13.89	-27.48	11.32	11.67	-17.36	-7.05	0.11	0.73	-10.37	-0.66	-30.2	-44.89	-45.3	0.96	31.76						-0.65	-71.59	58.76	-15.47	-25.22	-53.08	-14.93	-13.64	42.51	-31	0.09	-0.95	11.16	10.74	-11.59	-15.28	32.39
	-30	-10.94	-9.34	-0.08	-40.21	-0.15	-45.77	-11.37	-6.13	70	48.23	20.37	50.06	0.32	16.85	18.01	-12.81	-29.69	31.11	3.36	-4.65	52.79	0.48	0.65	-0.45	4.28	6.79						30.22	-32.56	9.08	-85.69	20	-16.73	-90.02	-47.98	71.25	21.09	63.43	23.71	17.19	17.68	-79.34	0.95	53.95
	-20	29.63	-4.43	39.34	-0.39	28.47	-13.46	-4.99	37.34	96.57	82.61	62.13	11.41	42.21	21.52	25.58	-84.22	10.34	61.17	54.91	21.34	54.27	57.77	53.74	26.72	70.18	12.16						88.48	0.33	11.78	-24.77	98.28	32.73	-33.94	41.69	10.27	70.91	12.36	57.43	19.78	25.52	-45.4	36.55	88.04
	-10	80.66	-0.29	83.58	45.49	77.73	19.83	1.02	12.31	13.56	12.05	11.82	17.51	77.01	27.68	32.64	-40.56	55.42	97.12	94.23	82.12	12.9	10.68	95.81	77.07	11.05	16.68						14.02	39.16	14.66	50.3	17.46	85.37	31.63	12.96	13.31	13.55	18.87	84.79	27.5	31.37	-12.39	69.26	11.94
	0	14.88	47.1	12.61	10.22	12.12	63.75	67.6	20.55	17.28	16.38	16.38	24.5	11.5	30.77	41.12	0.67	10.5	13.47	12.45	14.29	11.86	14.92	13.25	10.97	15.88	22.34						20.03	81.27	17.47	11.98	23.67	11.65	80.41	21.58	16.5	18.8	24.07	12.21	34.14	40.71	16.31	96.43	16.22
	10	20.58	10.42	17.1	15.44	14.88	11.07	13.14	28.16	20.49	20.32	22.08	33.1	15.43	38.08	50.51	51.52	15.95	17.47	17.14	20.44	15.54	21.28	18.01	17.66	19.97	27.9						25.67	12.65	19.49	21.11	27.54	15.3	15.4	30.01	20.51	25	30.99	16.51	39.88	52.51	59.12	13.6	20.55
	20	26.3	14.96	21.57	20.36	21.72	14.81	21.64	34.73	24.81	23.91	27.75	39.11	19.65	46.91	60.02	93.95	21.3	21.8	20.29	26.67	19.49	25.11	21.57	20.5	22.77	32.23						31.06	16.35	22.86	29.32	31.34	20.61	23.05	39.85	24.19	32.72	41.52	20.83	45.71	64.25	93.95	17.38	23.98
	30	33.53	18.97	26.22	25.13	22.04	19.65	27.73	45.4	29.3	29.07	32.44	48.06	21.96	50.45	71.65	14.63	27.2	24.85	23.53	32.61	30.02	30.58	25.99	25.9	27.56	39.31						37.27	19.77	24.88	37.11	33.04	25.2	29.09	48.97	27.62	37.48	50.73	25.62	50.58	70.52	13.07	20.35	29.29
	40	34.85	23.79	31.58	32.49	25.77	22.84	32.85	53.41	33.05	34.81	41.02	55.45	26.54	57.39	82.76	19.12	32.04	27.57	29.71	39.52	26.6	37.14	29.11	31.08	31.49	45.93						43.78	24.08	28.24	47.2	38.04	30.79	37.48	59.56	29.99	42.39	61.89	29.46	54.23	86.19	16.19	25.61	36.49
	50	40.71	28.84	35.92	36.44	30.17	28.54	42.01	63.84	38.55	37.94	48.97	63.65	34.63	64.12	90.94	23.45	39.04	32.17	33.42	47.56	35.34	41.59	33.64	38.81	36.02	51.94						47.15	28.12	28.89	55.68	40.44	37.68	42.79	67.99	34.98	46.85	70.76	36	62.96	93.43	20.49	29.79	39.91
	60	47.62	34.38	41.03	40.11	35.41	32.98	52.37	72.34	39.79	45.92	55.42	67.63	36.62	75.11	101.73	28.38	45.86	36.27	35.55	53.39	40.64	43.23	36.66	46.14	38.76	56.93						52.96	33.11	32.49	65.47	50.91	44.05	53.78	78.57	36.73	56.5	75.93	41.62	72.26	114.28	24.4	34.97	42.56
	Fig. 3b (IV-curves - 2d)
	mV	-20																															-70
	-170	-464.16	-325.77	-330.6	-354.91	-106.63	-178.87	-412.42	-173.88	-718.37	-146.81	-102.7	-154	-171.47	-130.03	-115.85	-293.03	-610.63	-117.82	-175.69	-252.98	-96.691											-459.44	-312.31	-327.46	-326.6	-94.733	-192.75	-413.54	-200.05	-554.46	-141.61	-101.12	-205.85	-185.37	-139.52	-143.2	-283.32	-550.06
	-160	-519.38	-332.92	-399.96	-325.58	-102.72	-181.33	-378.28	-204.53	-755.3	-172.9	-127.27	-157.87	-203.81	-149.01	-135.57	-378.03	-641.85	-108.6	-179.35	-288.84	-101.88											-506.98	-303.14	-404.36	-299.95	-95.433	-170.61	-378.48	-238.06	-584.29	-174.53	-125.62	-191.74	-216.46	-153.97	-117.2	-341.65	-586.64
	-150	-510.5	-322.68	-433.33	-289.88	-100.29	-178.38	-339.01	-213.3	-729.3	-195.85	-136.11	-166.93	-217.73	-162.52	-107.49	-402.81	-642.1	-99.318	-164.73	-286.72	-106.36											-506.67	-276.76	-450.76	-271.82	-92.192	-181.41	-341.99	-235.57	-584.72	-195.86	-138.7	-202.31	-241.78	-158.7	-123.48	-387.32	-616.51
	-140	-465.1	-287.75	-421.41	-261.36	-91.5	-175.96	-298.88	-213.41	-688.25	-192.56	-147.32	-157.24	-227.93	-165.16	-136.32	-398.23	-620.83	-86.399	-151.43	-271.61	-109.59											-464.55	-245.51	-422.32	-242.85	-88.26	-162.44	-298.37	-218.71	-555.28	-198.69	-143.59	-184.53	-247.96	-160	-115.58	-392.52	-588.44
	-130	-417.72	-249.87	-374.53	-219.89	-82.065	-161.97	-255.75	-196.88	-631.52	-181.81	-138.7	-142.93	-216.48	-152.11	-125.5	-354.82	-563.44	-74.476	-131.82	-242.78	-100.11											-396.28	-205.38	-376.99	-200.86	-80.908	-155.01	-251.62	-199.54	-505.29	-177.96	-135.12	-167.01	-228.51	-156.05	-104.7	-348.98	-535.61
	-120	-333.61	-200.26	-309.28	-179.47	-73.145	-142	-208.5	-168.1	-556.68	-154.85	-120.22	-122.72	-184.23	-138.15	-93.577	-291.02	-490.09	-61.362	-109.99	-197.86	-88.248											-317.7	-164.6	-311.99	-163.17	-71.616	-136.21	-201.06	-171.78	-439.33	-153.05	-117.78	-142.89	-194.5	-136.61	-92.084	-288.18	-462.62
	-110	-247.46	-146.62	-227.87	-140.48	-61.279	-119.98	-160.35	-136.64	-471.53	-122.67	-94.085	-94.083	-146.85	-112.69	-72.484	-214.38	-399.49	-48.544	-82.348	-146.52	-72.304											-226.6	-120.84	-227.75	-124.6	-62.752	-114.2	-154.81	-134.66	-356.89	-117.18	-90.652	-111.11	-157.91	-109.65	-78.946	-207.56	-370.15
	-100	-157.07	-90.94	-140.28	-98.224	-54.284	-94.099	-113.86	-96.779	-374.59	-83.761	-62.442	-61.618	-101.26	-83.361	-71.818	-129.78	-300.82	-37.767	-59.049	-95.071	-55.897											-139.7	-78.092	-138.33	-83.783	-52.257	-89.522	-106.55	-94.087	-271.83	-78.079	-59.089	-83.504	-108.85	-83.205	-60.132	-117.28	-269.36
	-90	-89.106	-48.808	-69.277	-64.171	-43.864	-70.85	-70.997	-62.44	-288.46	-46.335	-34.152	-36.574	-55.86	-56.072	-45.897	-59.499	-217.76	-28.457	-38.069	-48.999	-40.666											-70.259	-42.398	-70.026	-54.166	-43.103	-68.979	-64.851	-56.185	-200.16	-41.782	-30.484	-51.241	-64.948	-53.84	-47.405	-47.535	-186.36
	-80	-48.405	-26.109	-29.442	-41.577	-35.826	-56.455	-33.954	-37.387	-221.45	-22.182	-16.235	-18.559	-26.707	-38.985	-39.514	-25.002	-168.11	-21.167	-25.173	-24.399	-31.341											-36.472	-21.586	-29.933	-31.924	-35.857	-53.979	-29.278	-33.932	-154.83	-18.478	-13.135	-34.846	-35.747	-36.497	-38.699	-13.582	-138.68
	-70	-33.274	-14.223	-12.033	-26.488	-28.71	-45.663	-9.817	-23.586	-179.69	-8.6224	-5.7232	-9.327	-11.533	-29.063	-30.876	-11.551	-132.93	-14.837	-16.766	-11.544	-24.168											-13.183	-10.947	-14.118	-19.229	-27.729	-40.675	-4.8818	-21.869	-124.4	-3.8279	-1.1819	-21.16	-18.706	-25.028	-32.474	0.27431	-107.94
	-60	-22.396	-8.6994	-4.2039	-25.527	-22.424	-35.991	5.9666	-12.84	-141.12	1.4496	3.7011	-1.4796	-4.8472	-21.949	-20.05	-4.9326	-109.16	-8.5988	-11.063	-3.4502	-17.339											-6.3171	-3.465	-7.2885	-12.388	-20.809	-31.669	11.346	-7.4033	-93.776	7.1543	8.6501	-11.297	-11.76	-18.907	-24.809	5.3307	-83.59
	-50	-10.944	-3.8903	1.6722	-18.272	-15.426	-25.885	16.933	-0.35034	-106.2	10.159	12.705	4.0451	0.2051	-15.724	-13.652	-1.5521	-85.519	-2.2236	-4.016	4.4406	-11.168											0.15457	0.43847	0.19441	-7.119	-13.211	-22.122	22.364	1.2373	-64.894	17.149	17.556	-2.4608	-6.7468	-12.655	-16.883	7.8236	-62.363
	-40	0.28035	5.7921	7.8012	-11.158	-6.8777	-14.483	28.057	12.298	-70.644	19.311	23.13	14.293	4.7506	-8.8078	-9.2957	4.7444	-63.375	4.3091	-2.0055	10.298	-3.2176											10.398	4.7101	7.5903	-2.4454	-6.3976	-11.549	32.918	19.23	-33.458	28.345	28.393	8.0483	-1.0183	-6.0632	-9.2365	10.75	-41.207
	-30	14.796	14.957	16.493	-0.40921	3.8028	1.8721	41.321	34.801	-34.461	30.762	34.046	24.941	16.632	5.134	-3.2208	10.454	-30.275	11.85	3.4899	24.802	3.2612											42.733	17.818	24.973	4.8707	4.7253	19.413	46.474	46.692	46.813	49.667	69.38	28.89	31.154	28.231	5.3825	23.434	-8.6353
	-20	28.937	34.522	26.173	6.6081	22.837	19.674	58.635	62.309	-0.25495	44.447	49.682	41.559	34.962	32.465	6.5532	19.81	-15.157	21.595	15.967	50.168	17.498											139.36	81.896	99.529	33.467	55.378	117.77	84.993	188.12	187.26	72.874	173.39	100.38	143.63	150.38	63.242	76.595	57.233
	-10	46.644	55.26	35.28	13.512	43.025	36.607	76.083	97.98	44.209	57.038	62.176	51.582	46.079	48.544	13.625	30.893	10.583	31.638	25.792	70.029	26.533											209.82	164.42	133.86	62.743	116.94	158.34	135.73	322.22	284.43	91.812	240.37	172.53	196.13	208.69	96.546	98.801	93.582
	0	63.7	64.071	41.97	21.142	55.299	53.887	95.115	123.77	92.285	73.859	78.91	72.985	60.643	61.701	24.858	40.982	38.474	40.63	34.74	89.581	38.198											241.51	228.16	157.45	76.224	153.72	195.56	174.4	408.23	343.96	108.57	281.53	214.46	232.66	250.67	107.08	114.35	135.89
	10	81.644	81.584	53.091	30.559	67.695	73.643	110.29	163.04	140.46	89.952	93.04	88.131	75.883	73.486	36.982	46.558	68.057	49.564	40.487	106.72	45.456											267.94	268.82	173.85	85.12	179.99	225.97	202.68	475.1	403.58	120.23	311.59	247.56	257.96	285.35	122.65	136.68	168.49
	20	95.766	95.338	57.706	44.75	83.841	87.867	122.57	189.59	180.67	103.12	106.66	103.41	84.367	92.141	43.314	54.505	94.316	59.444	47.219	121.7	50.39											292.09	301.12	192.43	96.626	212.05	252.47	221.94	523.43	448.7	140.86	340.91	276.97	290.57	316.98	145.6	145.74	188.37
	30	111.26	104.48	70.481	57.426	101.2	104.01	133.62	218.21	226.98	118.54	129.11	123.58	99.232	104.09	56.104	65.064	123.61	67.254	53.763	135.1	61.275											318.59	331.12	215.07	108.05	236.52	285.54	238.92	575.33	507.08	155.15	367.98	308.68	331.35	338.37	160.17	154.96	223.53
	40	123.76	132.61	72.16	68.457	113.25	121.08	153.14	246.4	278.04	135.05	148.76	133.69	105.42	116.43	63.766	78.24	150.92	75.44	63.001	157.3	71.908											344.11	363.51	219.44	120.35	263.78	310.6	264.02	618.46	555.82	168.47	396.38	345.28	363.27	366.03	171.73	169.54	251.92
	50	139.3	166.42	83.641	78.47	120.99	139.89	172.34	278.97	317.89	145.76	168.15	151.17	111.08	126.17	72.304	90.145	183.1	89.932	64.445	165.07	81.261											359.13	385.1	222.95	128.98	275.23	332.2	276.72	668.9	599.9	187.43	423.35	376.5	375.53	373.44	179.58	181.26	279.94
	60	151.37	170.47	88.201	89.907	127.41	159.65	183.39	287.7	362.86	166.97	185.3	161	109.2	129.38	83.673	106.66	218.73	96.366	73.558	180.74	99.419											375.33	407.38	248.89	140	285.24	357.46	293.15	693.31	639.47	204.79	447.58	413.63	398.07	388.39	196.18	187.29	313.31
	Fig. 3b (IV-curves - 1w)
	mV	-20																															-70
	-170	-247.22	-142.25	-465.78	-179.2	-164.97	-152.63	-226.04	-137.08	-233.74	-200.58	-233.94	-216.18	-142.14	-185.26	-268.16	-221.85	-111.16	-191.4	-336.42	-467.54	-156.39	-242.98	-122.05	-76.538	-375.99	-138.3	-138	-234.55	-252.49	-403.46	-211.14	-235.45	-145.09	-439.2	-170.15	-158.42	-141.68	-199.33	-144.23	-244.27	-179.33	-166.63	-220.9	-163.93	-187.71	-255.79	-189.23	-98.719
	-160	-247.58	-154.84	-456.33	-179.6	-175.56	-156.57	-245.95	-163.3	-265.08	-196.16	-276.84	-240.14	-175.8	-191.39	-237.8	-279.34	-130.98	-205.13	-398.77	-472.73	-190.77	-304.25	-130.7	-85.633	-475.47	-138.08	-163.86	-282.45	-296.06	-406.7	-211.03	-242.03	-141.43	-453.02	-188.3	-170.96	-146.09	-221.56	-173.71	-262.73	-216.74	-203.84	-240.75	-209.6	-185.71	-231	-253.54	-126.07
	-150	-251.38	-155.82	-468.64	-169.92	-190.03	-155.37	-245.24	-184.75	-284.26	-221.06	-264.67	-246.53	-196.6	-179.63	-213.5	-307.79	-148.15	-214.57	-417.9	-446.29	-207.66	-331.28	-137.17	-95.668	-500.67	-132.32	-174.35	-308.57	-309.51	-398.02	-218.41	-244.21	-151.07	-466.36	-182.63	-182.14	-151.23	-224.48	-194.75	-255.79	-229.13	-228.28	-237.89	-233.63	-175.57	-203.89	-278.82	-144.69
	-140	-235.65	-147.83	-435.08	-153.17	-183.52	-150.38	-232.67	-187.9	-261.39	-221.69	-286.64	-230.91	-199.56	-169.82	-192.51	-308.48	-157.23	-202.53	-395.4	-417.31	-214.91	-325.95	-133.21	-91.508	-498.88	-113.18	-163.49	-297.76	-305.65	-360.72	-216.19	-230.44	-141.8	-442.75	-168.14	-172.35	-144.23	-215.47	-190.94	-258.95	-231.68	-229.85	-223.93	-219.03	-157.1	-172.01	-284.02	-150.33
	-130	-208.29	-135.06	-399.53	-133.52	-166.86	-140.3	-207.38	-175.66	-234.83	-203.74	-224.09	-203.18	-190.87	-145.38	-157.64	-274.5	-145.48	-181.59	-345.56	-371.63	-195.24	-301.33	-126.86	-84.472	-441.88	-90.299	-153.34	-267.7	-270.15	-319.81	-193.07	-207.42	-131.26	-396.8	-147.92	-157.32	-134.43	-192.27	-183.06	-237.88	-213.5	-210.6	-192.45	-235.34	-138.42	-141	-255.16	-143.69
	-120	-174.65	-118.99	-344.09	-108.5	-144.39	-121.93	-177.48	-147.27	-180.98	-171.98	-179.52	-166.07	-164.2	-119.96	-120.92	-230.19	-126.59	-152.58	-283.29	-316.88	-162.77	-254.54	-113.71	-71.068	-361.41	-81.444	-123.61	-219.28	-220.12	-257.64	-158.99	-176.68	-114.31	-338.6	-129	-133.28	-116.81	-161.71	-160.38	-205.48	-180.63	-176.96	-156.92	-185.77	-112.64	-109.65	-208.87	-120.15
	-110	-135.85	-96.529	-275.2	-87.73	-113.55	-101.5	-140.42	-116.27	-138.17	-139.96	-129.64	-127.36	-124.32	-95.192	-89.923	-167.35	-97.984	-113.45	-207.12	-247.69	-122.03	-187.91	-92.93	-59.414	-267.33	-65.882	-91.749	-158.51	-163	-186.34	-124.35	-139.08	-92.899	-265.84	-100.14	-103.51	-97.282	-125.29	-127.79	-162.31	-136.55	-131.74	-118.12	-150.02	-85.77	-79.193	-149.23	-100.16
	-100	-95.327	-72.781	-196.69	-66.208	-82.127	-79.314	-101.14	-77.795	-93.651	-93.234	-78.167	-85.444	-79.464	-67.358	-59.639	-100.17	-67.237	-74.083	-127.88	-178.4	-76.027	-112.86	-71.872	-40.848	-154.34	-47.827	-54.08	-95.795	-100.17	-120.77	-85.265	-93.426	-68.461	-183.6	-74.999	-72.502	-73.323	-86.434	-84.262	-114.51	-87.911	-78.39	-77.476	-80.045	-59.893	-47.839	-84.241	-64.608
	-90	-66.156	-55.977	-121.07	-47.975	-56.957	-61.274	-67.473	-43.864	-59.36	-60.13	-35.844	-51.199	-42.221	-44.397	-36.014	-47.703	-40.083	-45.394	-59.121	-122.88	-36.561	-51.81	-51.161	-25.832	-64.491	-30.451	-25.294	-44.853	-47.034	-69.083	-53.144	-62.815	-50.54	-109.46	-53.532	-48.695	-55.332	-55.003	-49.057	-74.331	-51.219	-36.843	-44.821	-46.382	-38.853	-31.638	-35.657	-35.28
	-80	-49.671	-46.455	-77.554	-34.57	-39.938	-50.074	-46.624	-29.481	-45.708	-35.529	-17.868	-29.883	-19.892	-29.413	-19.232	-22.756	-21.496	-31.583	-22.189	-95.326	-18.172	-24.563	-39.2	-18.148	-19.805	-26.038	-11.316	-18.635	-19.436	-39.001	-30.131	-46.991	-42.237	-65.598	-37.059	-34.261	-44.815	-36.184	-31.757	-50.682	-29.798	-16.445	-23.778	-24.408	-24.386	-8.0337	-10.673	-18.498
	-70	-40.439	-39.438	-51.855	-24.692	-29.917	-42.44	-34.359	-22.972	-39.239	-25.411	-10.176	-17.645	-11.499	-19.312	-4.5105	-10.861	-10.563	-24.727	-5.4761	-71.915	-9.0725	-18.859	-29.959	-12.016	-1.925	-19.03	-5.5958	-6.8339	-7.5369	-22.616	-21.128	-36.219	-34.767	-42.775	-23.43	-24.971	-36.967	-25.118	-29.057	-40.799	-21.015	-6.1645	-11.755	-8.5209	-14.224	1.2831	2.2462	-6.0038
	-60	-32.666	-33.416	-38.482	-16.289	-22.129	-35.535	-25.445	-18.412	-26.666	-17.892	-11.506	-8.9873	-4.3277	-11.783	1.5557	-2.5755	-5.0557	-19.221	1.154	-56.113	-4.8464	-9.6633	-21.005	-7.4406	1.8213	-12.018	-3.503	-0.55239	-2.011	-10.87	-15.219	-28.957	-29.096	-32.642	-14.45	-16.612	-30.683	-17.586	-22.312	-29.379	-11.804	-1.5258	-3.7538	-1.7204	-6.1767	7.6251	9.1139	-0.31847
	-50	-26.035	-27.706	-28.914	-9.3099	-14.521	-28.963	-18.247	-13.21	-21.323	-13.158	-3.3741	-2.4073	0.40454	-4.4856	1.8635	4.6874	-0.69094	-13.552	3.5173	-37.445	-2.5681	-6.7632	-13.895	-3.1586	4.6245	-6.6495	-1.1997	4.2108	1.6157	-2.7236	-8.1606	-22.703	-23.699	-25.126	-5.6648	-9.4718	-24.229	-12.178	-15.605	-19.899	-4.3606	2.4346	2.7496	2.4645	0.15688	11.693	15.293	3.1993
	-40	-18.373	-21.666	-23.992	-2.5208	-8.1737	-22.922	-11.467	-9.2809	-12.268	-5.6078	1.6219	4.4468	6.276	2.2684	8.8322	11.177	2.4335	-7.5329	6.4416	-23.819	1.2213	-2.0141	-8.4303	0.53771	7.1725	-2.9294	-0.04456	9.3818	5.5977	6.5413	0.50483	-16.774	-18.148	-20.119	0.73167	-2.3792	-18.541	-6.6072	-9.1486	-12.448	1.6608	5.0928	9.1456	6.8888	6.7764	15.052	22.018	6.761
	-30	-11.609	-14.883	-16.625	5.0982	-1.3062	-16.431	-5.0217	-3.3521	-4.9746	4.8142	1.3669	11.511	11.485	9.6318	13.289	18.935	5.9429	-0.93392	9.4949	-7.3353	4.5012	2.2946	-2.3538	6.3852	13.357	-0.2385	1.7387	15.334	11.61	14.622	5.3162	-8.6481	-12.277	-13.332	8.5114	5.8014	-10.6	-1.0861	-0.67736	11.166	31.475	22.427	19.879	19.769	17.392	18.266	26.923	11.36
	-20	-3.77	-7.5249	-6.5944	11.974	5.6075	-9.7605	0.79148	3.5408	2.7161	6.616	10.218	15.509	18.325	20.622	18.064	25.762	11.736	6.8361	13.959	8.2565	9.252	9.4225	7.6509	12.121	21.609	4.0912	3.11	21.665	19.338	24.038	12.848	-1.4094	-5.4617	-1.7724	15.54	12.762	-2.5454	5.2027	27.067	55.269	115.57	84.111	53.089	59.066	47.544	20.75	33.496	18.469
	-10	4.2096	-0.24583	2.1694	18.728	11.95	-2.6029	6.4483	10.948	9.9819	17.288	15.949	26.809	23.077	29.248	22.42	33.181	15.638	13.85	16.731	22.344	12.001	11.455	13.921	17.681	31.407	8.061	5.1417	29.858	28.602	32.924	23.123	6.2861	2.2958	12.378	22.206	21.479	3.5362	11.698	36.419	72.769	169.59	121.16	81.951	79.86	78.834	25.543	40.68	24.834
	0	12.714	7.2024	9.6887	27.229	20.184	3.4064	12.774	17.832	19.052	24.605	20.704	35.954	30.002	39.525	26.402	41.379	21.487	22.755	20.847	37.265	15.904	19.558	23.19	22.151	42.039	12.176	7.9293	34.753	31.454	41.353	28.412	14.282	8.7363	22.095	29.541	27.737	8.5802	17.668	45.905	89.476	197.87	132.76	96.147	96.078	98.908	29.262	46.251	30.204
	10	21.753	14.086	17.833	34.98	25.955	10.154	18.421	22.976	27.545	34.614	27.509	39.589	35.063	45.682	32.622	48.822	26.887	31.986	23.68	54.888	21.256	24.541	29.859	30.615	48.522	16.057	9.6861	40.061	38.435	51.374	38.918	23.566	16.73	32.838	36.194	36.994	16.028	24.501	52.946	99.862	214.6	149.1	109.8	107.84	117.72	34.507	52.134	38.433
	20	31.276	21.694	28.444	40.73	33.851	17.816	24.569	30.547	37.277	44.756	28.454	49.042	41.658	58.184	41.148	59.194	29.64	38.567	30.139	68.499	22.43	27.582	39.349	34.722	50.297	21.288	11.095	45.427	42.09	60.617	48.028	31.969	22.925	40.378	42.259	42.81	22.034	30.073	63.934	113	234.63	167.76	123.23	119.37	133.53	38.782	59.48	46.33
	30	41.833	29.935	38.798	48.549	39.464	24.897	31.064	40.356	48.219	55.325	36.646	56.662	54.23	68.609	43.698	70.604	35.873	46.409	35.254	83.421	25.967	32.935	49.341	39.546	58.601	27.97	12.839	52.492	45.133	69.678	59.449	42.434	32.321	53.715	49.228	49.957	27.926	33.243	78.665	125.17	257.38	166.18	129.2	140.42	154.48	42.848	67.438	48.72
	40	52.441	37.831	49.544	55.806	46.094	32.608	36.026	47.255	57.924	62.848	45.734	66.89	58.596	71.663	55.433	81.201	44.648	54.988	40.171	96.91	33.771	38.132	54.404	47.961	77.114	31.459	15.467	58.741	56.078	82.211	71.197	52.577	40.171	64.11	54.844	57.969	33.408	38.727	81.546	135.7	272.33	168.44	133.13	152.4	168.42	48.426	75.683	53.454
	50	65.322	46.334	60.179	61.337	51.552	38.754	42.675	56.276	69.506	74.658	46.484	72.621	60.776	84.853	52.495	98.051	47.163	64.33	48.33	111.32	38.115	47.191	65.178	55.282	84.192	38.786	19.36	63.987	68.431	90.426	81.478	63.9	48.086	74.984	60.844	64.721	43.089	43.797	86.108	142.94	288.38	192.1	133.17	156.17	189.92	52.35	85.008	60.503
	60	76.535	56.581	73.781	67.028	56.992	46.881	48.347	59.199	78.862	88.159	56.018	82.334	69.467	94.544	65.238	116.33	52.513	70.683	57.143	131.04	44.871	51.777	77.579	60.651	79.124	55.846	22.494	75.947	71.38	102.95	92.598	75.776	59.544	89.999	65.164	72.806	49.079	49.671	99.93	150.54	297.06	191.89	141.52	174.32	194.91	55.862	92.02	65.669
	Fig. 3b (IV-curves - 8w)
	mV	-20																															-70
	-170	-204.24	-450.15	-105.47	-139.54	-197.73	-119.83	-668.5	-758.49	-857.85	-88.499	-260.96	-485.02	-755.74	-659.24	-122.97	-160.8	-733.21	-634.12	-149.4	-80.906	-100.04	-135.87	-129.08	-1269.8	-486.82							-73.173	-611.78	-108.92	-351.8	-116.35	-728.48	-746.83	-886.23	-93.721	-247.14	-449.35	-789.7	-620.9	-120.32	-174.25	-780.86	-673.82
	-160	-155.52	-415.62	-101.31	-118.36	-195.92	-111.59	-725.13	-822.78	-828.8	-115.18	-340.81	-568.37	-805.25	-794.02	-150.46	-186.5	-805.95	-733.97	-166.8	-94.976	-120.7	-164.96	-178.09	-1365.2	-554.42							-66.152	-509.3	-100.17	-279.99	-138.2	-728.45	-820.38	-854.11	-118.82	-332.09	-546.35	-809.47	-767.91	-149.83	-206.74	-840.56	-769.35
	-150	-138.67	-383.51	-95.08	-150.78	-185.03	-127.23	-714.09	-786.23	-768.48	-123.32	-385.46	-602.03	-777.95	-824.55	-162.59	-204.86	-789.57	-743.41	-188.95	-112.37	-131.57	-198.57	-207.33	-1323.9	-542.07							-62.31	-498.19	-94.66	-137.13	-132.39	-707.55	-820.44	-787.85	-128.69	-391.53	-572.29	-777.02	-839.1	-157.93	-224.64	-808.31	-759.82
	-140	-119.7	-346.99	-84.976	-96.297	-167.94	-124.03	-649.13	-701.57	-682.02	-122.3	-388.04	-541.78	-702.88	-800.93	-174.24	-212.93	-719	-696	-192.54	-119.33	-128.86	-210.43	-234.67	-1201.1	-507.62							-54.495	-435.7	-91.587	-97.523	-129.26	-642.48	-760.59	-695.48	-121.76	-393.63	-538.64	-688.13	-818.33	-165.68	-221.2	-730.62	-703.34
	-130	-103.35	-305.46	-82.045	-93.986	-152.77	-113.21	-560.12	-603.49	-568.95	-106.71	-346.48	-484.44	-593.12	-711.94	-158.8	-197.64	-619.2	-600.16	-177.81	-114.38	-125.42	-194.15	-222.26	-1019.5	-443.55							-55.383	-349.79	-82.132	-87.785	-116.69	-554.43	-658.7	-579.53	-109.47	-359.58	-475.84	-582.66	-748.1	-156.87	-207.74	-622.09	-609.47
	-120	-90.519	-244.54	-70.623	-74.388	-133.36	-94.338	-447.09	-481.24	-447.97	-90.234	-290.1	-397.86	-467.71	-599.7	-136.24	-170.77	-492.2	-486.98	-158.27	-97.853	-109.57	-170.54	-190.45	-813.36	-359.25							-40.084	-271.87	-67.726	-71.88	-100.96	-443.59	-530.58	-459.93	-91.485	-301.37	-386.67	-455.56	-626.92	-132.29	-178.52	-492.04	-494.26
	-110	-75.827	-191.69	-60.308	-62.791	-112.33	-74.364	-318.13	-345.62	-314.3	-66.513	-211.75	-294.27	-329.32	-452.79	-104.34	-135.01	-347.56	-343.51	-122.99	-77.322	-88.935	-126.33	-143.84	-570.51	-271.85							-36.251	-225.36	-58.041	-62.477	-76.726	-310.76	-376.75	-313.16	-67.753	-223.41	-280.72	-314.3	-475.11	-102.31	-137.44	-343.6	-354.46
	-100	-60.004	-136.78	-49.745	-52.416	-92.696	-49.148	-182.3	-207.34	-181.9	-42.094	-121.51	-185.29	-186.28	-289.73	-67.643	-84.593	-195.19	-195.95	-83.971	-52.137	-62.253	-69.68	-90.459	-322.15	-177.25							-26.454	-158.15	-47.635	-51.931	-49.417	-173.69	-223.9	-177.88	-41.709	-129.34	-165.53	-176.01	-295.84	-65.174	-88.81	-189.15	-204.35
	-90	-44.082	-89.197	-39.217	-42.421	-75.109	-21.928	-73.372	-96.534	-74.631	-20.781	-51.9	-98.244	-75.206	-156.41	-37.711	-42.456	-75.278	-78.112	-48.194	-29.956	-40.036	-25.173	-45.089	-137.88	-100.8							-22.612	-104.61	-37.564	-40.553	-23.506	-64.186	-97.671	-72.536	-20.823	-48.27	-71.965	-66.864	-151.05	-34.584	-46.299	-67.919	-81.91
	-80	-33.677	-51.706	-30.263	-32.37	-61.339	-6.7178	-16.488	-36.765	-16.556	-9.3611	-15.797	-38.832	-14.979	-87.038	-22.125	-21.203	-15.86	-21.012	-31.546	-16.838	-25.997	-5.3149	-16.904	-35.865	-53.651							-20.592	-80.489	-27.685	-32.216	-5.9916	-17.786	-40.046	-20.116	-8.9376	-9.4826	-18.307	-7.5064	-78.517	-15.498	-23.663	-8.7322	-19.908
	-70	-25.064	-33.59	-23.413	-25.163	-49.84	-0.60001	4.4519	-13.637	6.8057	-2.7248	-3.6334	-6.0551	11.382	-56.89	-8.5851	-8.6326	3.781	-0.34971	-17.697	-8.2372	-17.71	0.33027	-1.6086	8.1184	-29.803							-21.697	-52.942	-22.805	-23.912	-1.0802	3.0383	-12.632	9.7347	-0.24389	9.2795	9.3138	19.561	-43.544	-3.2622	-4.8881	11.206	5.4005
	-60	-17.77	-24.613	-17.806	-20.106	-39.886	2.3295	10.271	-3.5856	14.183	3.5835	5.9685	12.616	20.217	-42.279	1.5361	-0.7287	6.2097	5.477	-11.483	-2.6662	-11.803	3.9623	8.9546	22.058	-19.437							-18.487	-43.151	-19.178	-16.892	3.535	7.4107	-3.2512	15.479	6.211	17.36	24.523	29.563	-30.507	6.2253	1.2278	13.907	12.962
	-50	-12.435	-15.144	-12.874	-13.279	-30.268	3.5473	10.273	1.7519	17.19	8.9853	12.411	26.51	25.81	-31.995	8.3353	4.2934	5.2753	7.4681	-5.7884	2.6243	-5.8368	6.7713	18.365	42.694	-13.15							-11.299	-31.185	-14.074	-12.917	5.3904	5.8396	4.2968	18.398	12.35	24.26	38.546	34.962	-22.144	13.875	6.458	10.292	14.064
	-40	-7.3749	-8.4579	-7.1903	-8.1389	-20.512	4.967	9.9865	9.7051	23.906	16.091	19.314	42.063	28.375	-16.334	14.777	9.4423	5.3814	10.864	3.3213	8.9986	0.033736	9.3939	26.986	67.764	-8.0398							-4.8497	-22.702	-5.1511	-6.9117	6.6794	6.0726	8.2999	23.918	20.027	29.626	53.674	36.812	-11.725	20.799	10.112	8.141	16.09
	-30	-2.0821	-3.1844	-1.5117	-2.2766	-10.12	6.2893	11.334	20.11	30.5	24.441	28.628	62.284	32.927	0.61584	22.224	14.852	7.3255	15.628	7.6308	14.304	6.6573	13.084	35.15	100.81	-2.4833							0.74278	-14.589	-0.92569	-1.5821	7.9306	9.4768	26.063	42.01	27.466	38.391	71.967	40.326	4.515	29.486	15.824	9.9339	20.723
	-20	3.0874	3.2375	4.0657	2.6712	0.41435	8.0394	14.179	28.008	39.438	32.945	37.117	87.909	35.817	20.561	29.114	21.532	8.6711	18.609	15.746	18.298	12.339	17.239	43.311	148.8	5.1539							5.6399	-2.6781	5.4942	4.1466	9.8928	26.877	53.362	73.906	37.548	52.373	99.13	45.606	22.096	39.596	25.512	12.955	27.885
	-10	9.2229	9.9575	9.9186	8.6194	11.043	10.8	16.347	41.545	53.651	41.255	49.427	114.57	40.233	42.508	37.191	26.709	13.563	24.793	21.347	23.532	18.484	22.229	52.116	209.03	13.32							10.292	9.0497	11.667	9.6472	12.047	39.327	71.966	100.82	51.401	66.644	129.47	50.268	47.16	49.913	35.217	19.61	36.245
	0	14.941	16.843	15.733	13.781	22.107	12.811	22.246	51.888	67.665	55.686	63.383	147.68	44.973	67.241	43.277	33.497	17.597	30.037	28.618	31.275	25.382	25.524	58.974	270.88	21.569							14.211	21.587	17.577	14.772	14.833	47.344	98.124	116.23	64.314	78.954	165.83	55.383	76.309	61.217	45.128	24.392	42.812
	10	20.729	23.143	22.445	19.522	33.142	15.397	26.119	67.267	82.119	74.349	78.64	186.36	48.357	102.34	50.396	41.266	21.758	34.393	35.712	34.821	32.159	30.636	68.443	355.83	29.655							19.212	35.817	23.751	20.001	17.489	56.51	117.73	144.14	76.999	97.9	199.82	59.533	113.59	65.172	53.401	28.652	49.789
	20	27.093	31.19	28.164	25.51	44.847	17.76	34.706	91.622	105.78	88	99.323	237.25	54.179	132.9	56.688	46.658	29.338	39.731	41.921	43.144	39.199	34.984	77.005	446.55	40.956							23.587	45.563	29.694	25.491	19.41	61.639	140.12	158.76	100.61	116.23	259.71	63.698	146.31	73.111	60.588	39.144	55.271
	30	34.066	37.975	34.485	31.648	58.037	20.267	39.047	114.8	121.85	105.85	118.33	283.32	56.33	175.22	63.221	54.732	38.096	42.551	47.296	48.75	45.368	41.723	82.841	552.77	51.021							27.621	61.181	35.762	30.818	23.193	75.908	160.13	193.21	119.78	136.96	303.13	67.609	183.65	83.412	67.838	47.28	63.791
	40	39.501	44.627	40.313	38.029	70.153	24.185	47.954	137.58	149.25	130.25	145.88	346.01	60.648	213.49	71.255	64.415	42.983	48.101	55.543	56.222	51.71	45.563	88.724	658.08	58.649							31.56	81.757	41.887	35.863	26.247	88.009	197.74	219.04	134.8	171.56	367.81	72.809	221.32	95.619	76.496	55.065	70.919
	50	45.644	53.147	46.057	45.255	83.643	27.013	54.726	160.46	177.12	142.33	162.98	407.11	63.069	262.77	77.975	69.402	51.204	54.617	61.939	68.239	60.107	51.438	97.287	794.58	71.755							37.108	102.76	49.015	43.468	29.984	107.59	219.97	244	166.04	193.47	439.91	75.664	276.84	104.48	90.134	64.964	78.482
	60	53.1	63.453	52.734	54.263	96.71	30.712	64.232	191.47	200.79	171.44	188.44	474.99	66.779	317.36	85.82	76.469	63.061	60.743	69.007	71.229	65.428	52.629	104.28	947	79.847							43.114	117.09	56.61	49.515	34.383	114.02	251.56	279.91	180.53	205.79	518.57	79.608	331.82	118.13	102.18	69.8	89.455
	Fig. 3c (Rm[GΩ])					Fig. 3c (Cm[pF])					Fig. 3c (Vrev[mV])					Fig. 3c (Gout[nS/pF])					Fig. 3c (Gin[nS/pF])							Fig. 3d (Gin distribution)
	CTL	2d	1w	8w		CTL	2d	1w	8w		CTL	2d	1w	8w		CTL	2d	1w	8w		CTL	2d	1w	8w				0.1	0.2	0.3	0.4	0.5	0.6	0.7	0.8	0.9
	1.5609	0.81793	1.1475	1.6051		25.697	37.024	13.287	6.3589		-38.219	-50.239	-18.169	-31.328		0.021031	0.134472	0.057314	0.149265		0.053775	0.249797	0.315602	0.245318				12	10	9	3	0	3	1	3	1
	1.9096	0.70741	1.2335	1.3795		14.953	40.888	12.003	6.0463		-20.918	-51.123	-12.959	-17.716		0.085243	0.189559	0.055995	0.15014		0.06287	0.139866	0.202124	0.896251
	2.1381	0.80457	1.0988	1.9369		12.482	39.865	13.359	10.956		-64.547	-50.26	-18.747	-28.558		0.005008	0.072287	0.092775	0.065959		0.055804	0.220783	0.601729	0.102186
	2.3032	0.88036	1.4142	1.5471		16.817	24.741	13.327	9.8954		-16.7	-36.657	-41.144	-27.238		0.023711	0.103388	0.070306	0.074375		0.097473	0.162322	0.164054	0.106357
	2.3683	0.70007	1.6243	0.95793		17.573	23.839	14.89	7.4292		-34.423	-34.248	-37.092	-32.047		0.043345	0.141928	0.059661	0.123718		0.082524	0.049308	0.214147	0.287231
	2.2605	0.57344	1.4192	3.6778		17.309	23.274	3.7265	3.7726		-26.618	-36.27	-15.815	-67.659		0.040033	0.142525	0.115993	0.054898		0.036025	0.105347	0.603287	0.653064
	1.3416	0.6306	1.6673	0.95147		13.022	20.288	9.7399	13.306		-14.824	-66.992	-28.273	-71.459		0.024014	0.272849	0.075217	0.050424		0.088262	0.234671	0.406986	0.54581
	1.0519	0.32566	1.3132	1.3563		11.964	34.153	15.523	25.802		-24.65	-51.432	-29.756	-55.693		0.04186	0.278797	0.063257	0.088473		0.076638	0.117802	0.236246	0.18397
	2.0916	0.25941	1.374	1.1956		21.069	41.606	14.067	25.868		-56.098	-35.832	-34.728	-73.261		0.20946	0.191579	0.128222	0.078071		0.083431	0.228393	0.319094	0.652936
	2.5175	0.84196	1.1767	0.38862		22.796	33.665	19.552	13.306		-34.048	-66.514	-42.758	-69.622		0.014078	0.053607	0.21746	0.122859		0.094392	0.113285	0.227217	0.768583
	1.6303	0.76699	1.8477	2.698		24.468	36.607	17.395	13.472		-40.126	-68.798	-56.147	-74.946		0.023141	0.148145	0.13842	0.108983		0.063089	0.084955	0.30215	0.788409
	1.6019	0.6942	1.3099	0.49488		21.409	29.876	19.315	14.247		-37.136	-47.658	-54.228	-73.372		0.027379	0.178055	0.129094	0.227211		0.045145	0.106753	0.21298	0.695904
	3.4265	0.61626	2.3719	1.4083		26.049	28.448	25.809	18.368		-72.709	-39.683	-55.889	-77.227		0.013005	0.140732	0.061986	0.031506		0.073604	0.156602	0.175518	0.215652
	1.4484	0.5567	0.97753	1.638		14.526	25.204	17.842	23.486		-56.64	-38.232	-50.248	-32.78		0.048596	0.168504	0.141694	0.105064		0.065517	0.114412	0.146234	0.272255
	1.1446	1.3496	2.4438	2.1236		18.808	25.056	16.715	16.154		-5.6824	-33.682	-71.377	-66.562		0.041024	0.086818	0.036062	0.068016		0.179434	0.045223	0.181977	0.818162
	2.276	1.0137	1.6132	1.6551		11.512	31.676	22.015	16.084		-33.829	-70.198	-71.739	-62.008		0.026927	0.06272	0.030557	0.06766		0.037457	0.271073	0.304626	0.8127
	2.15	0.40036	2.2803	1.5306		16.923	41.272	12.026	18.808		-47.322	-28.689	-59.095	-75.62		0.018958	0.098686	0.049974	0.032901		0.043355	0.238067	0.26207	0.244102
	3.0665	0.99927	1.6137	1.717		29.709	21.395	20.881	18.473		-43.08	-61.175	-31.776	-72.134		0.012493	0.102523	0.038563	0.042452		0.053948	0.065653	0.196545	0.093181
	2.3795	1.5026	1.7486	1.3873		17.028	28.971	25.13	15.894		-25.455	-43.929	-69.646	-50.412		0.014391	0.09745	0.05965	0.044133		0.059164	0.086863	0.324115	0.133337
	1.3756	0.46064	0.67225	2.5793		22.493	37.864	22.459	26.134		-44.057	-67.219	-25.211	-63.082		0.033244	0.232804	0.079926	0.01957		0.091382	0.144031	0.306737	0.332163
	4.9371	0.96698	3.9219	1.2201		23.743	25.919	22.055	18.607		-40.467	-29.526	-50.592	-45.538		0.007159	0.109235	0.025928	0.035053		0.043103	0.067634	0.205679	0.258761
	2.4086		1.902	0.23514		14.499		18.501	15.314		-40.767		-38.246	-67.809		0.037722		0.0522	0.034455		0.063356		0.396357	1.00221
	2.3226		1.2839	1.4903		22.305		13.437	18.884		-31.751		-35.724	-76.614		0.042658		0.093644	0.038955		0.112645		0.151395	0.596395
	1.8728		1.6291			32.643		14.736	25.101		-56.35		-50.222	-73.895		0.013695		0.107624	0.301956		0.053618		0.106057
	3.4823		1.275			31.364		26.123	15.866		-57.902		-66.91	-33.183		0.009808		0.235008	0.095306		0.043724		0.425066
			2.1305			4.0053		17.032					-36.09			0.10804		0.026137			0.40218		0.108596
			4.5998					10.185					-35.246					0.110044					0.350025
			1.5205					20.673					-65.019					0.048733					0.312557
			1.4624					17.635					-70.314					0.056199					0.355347
			1.1935					27.81					-49.477					0.033995					0.247033
			1.2913					26.734					-35.835					0.047555					0.15061
[truncated: 14 more columns]

## Sheet: Fig. 4 and Sup. Fig. 6
	Fig. 4b (IV-curves of microglial cells belonging to the same clones 8 weeks after MCAo)
	mV	Clone A		Clone B		Clone C		Clone D		Other cells
	-170	-108.92	-351.8	-135.84	-84.146	-780.86	-673.82	-746.83	-886.23	-611.78	-73.173	-153.16	-116.35	-728.48	-93.721	-247.14	-449.35	-789.7	-620.9	-120.32	-174.25	-110.5	-145.54	-119.96	-532.72
	-160	-100.17	-279.99	-164.58	-97.364	-840.56	-769.35	-820.38	-854.11	-509.3	-66.152	-150.34	-138.2	-728.45	-118.82	-332.09	-546.35	-809.47	-767.91	-149.83	-206.74	-121.85	-183.31	-162.87	-566.85
	-150	-94.66	-137.13	-185.27	-115.35	-808.31	-759.82	-820.44	-787.85	-498.19	-62.31	-143.82	-132.39	-707.55	-128.69	-391.53	-572.29	-777.02	-839.1	-157.93	-224.64	-136.21	-209.51	-206.1	-555.14
	-140	-91.587	-97.523	-188.27	-130.81	-730.62	-703.34	-760.59	-695.48	-435.7	-54.495	-130.32	-129.26	-642.48	-121.76	-393.63	-538.64	-688.13	-818.33	-165.68	-221.2	-137.94	-218.79	-218.04	-511.93
	-130	-82.132	-87.785	-176.99	-114.83	-622.09	-609.47	-658.7	-579.53	-349.79	-55.383	-115.33	-116.69	-554.43	-109.47	-359.58	-475.84	-582.66	-748.1	-156.87	-207.74	-129.6	-202.38	-211.25	-448.71
	-120	-67.726	-71.88	-149.52	-102.79	-492.04	-494.26	-530.58	-459.93	-271.87	-40.084	-98.601	-100.96	-443.59	-91.485	-301.37	-386.67	-455.56	-626.92	-132.29	-178.52	-115.2	-174.03	-174.47	-368.29
	-110	-58.041	-62.477	-115.94	-81.23	-343.6	-354.46	-376.75	-313.16	-225.36	-36.251	-81.21	-76.726	-310.76	-67.753	-223.41	-280.72	-314.3	-475.11	-102.31	-137.44	-93.706	-129.96	-127.81	-273.21
	-100	-47.635	-51.931	-76.423	-53.369	-189.15	-204.35	-223.9	-177.88	-158.15	-26.454	-63.138	-49.417	-173.69	-41.709	-129.34	-165.53	-176.01	-295.84	-65.174	-88.81	-66.462	-74.36	-75.208	-176.38
	-90	-37.564	-40.553	-42.852	-28.397	-67.919	-81.91	-97.671	-72.536	-104.61	-22.612	-47.805	-23.506	-64.186	-20.823	-48.27	-71.965	-66.864	-151.05	-34.584	-46.299	-40.396	-27.15	-30.81	-96.464
	-80	-27.685	-32.216	-24.235	-14.559	-8.7322	-19.908	-40.046	-20.116	-80.489	-20.592	-37.223	-5.9916	-17.786	-8.9376	-9.4826	-18.307	-7.5064	-78.517	-15.498	-23.663	-25.683	-8.7542	-5.2617	-51.659
	-70	-22.805	-23.912	-14.276	-5.3277	11.206	5.4005	-12.632	9.7347	-52.942	-21.697	-28.259	-1.0802	3.0383	-0.24389	9.2795	9.3138	19.561	-43.544	-3.2622	-4.8881	-16.29	-0.68199	10.28	-26.777
	-60	-19.178	-16.892	-6.4508	2.3738	13.907	12.962	-3.2512	15.479	-43.151	-18.487	-20.35	3.535	7.4107	6.211	17.36	24.523	29.563	-30.507	6.2253	1.2278	-9.2381	2.4307	21.336	-18.595
	-50	-14.074	-12.917	0.27696	8.4811	10.292	14.064	4.2968	18.398	-31.185	-11.299	-13.287	5.3904	5.8396	12.35	24.26	38.546	34.962	-22.144	13.875	6.458	-2.8796	5.9056	31.499	-12.997
	-40	-5.1511	-6.9117	7.1047	13.304	8.141	16.09	8.2999	23.918	-22.702	-4.8497	-5.8447	6.6794	6.0726	20.027	29.626	53.674	36.812	-11.725	20.799	10.112	3.5738	8.4004	39.186	-6.7571
	-30	-0.92569	-1.5821	14.299	18.945	9.9339	20.723	26.063	42.01	-14.589	0.74278	1.5046	7.9306	9.4768	27.466	38.391	71.967	40.326	4.515	29.486	15.824	9.62	13.816	46.881	3.1553
	-20	5.4942	4.1466	20.725	23.906	12.955	27.885	53.362	73.906	-2.6781	5.6399	9.439	9.8928	26.877	37.548	52.373	99.13	45.606	22.096	39.596	25.512	16.249	16.619	52.775	23.661
	-10	11.667	9.6472	26.191	30.002	19.61	36.245	71.966	100.82	9.0497	10.292	18.219	12.047	39.327	51.401	66.644	129.47	50.268	47.16	49.913	35.217	22.697	22.134	59.271	37.594
	0	17.577	14.772	33.836	34.011	24.392	42.812	98.124	116.23	21.587	14.211	25.744	14.833	47.344	64.314	78.954	165.83	55.383	76.309	61.217	45.128	29.427	26.303	65.892	50.013
	10	23.751	20.001	39.183	40.832	28.652	49.789	117.73	144.14	35.817	19.212	35.16	17.489	56.51	76.999	97.9	199.82	59.533	113.59	65.172	53.401	36.922	32.865	71.347	60.574
	20	29.694	25.491	46.037	48.097	39.144	55.271	140.12	158.76	45.563	23.587	42.776	19.41	61.639	100.61	116.23	259.71	63.698	146.31	73.111	60.588	45.176	39.596	78.445	73.663
	30	35.762	30.818	52.747	51.794	47.28	63.791	160.13	193.21	61.181	27.621	53.135	23.193	75.908	119.78	136.96	303.13	67.609	183.65	83.412	67.838	51.321	45.451	84.15	79.458
	40	41.887	35.863	59.184	59.233	55.065	70.919	197.74	219.04	81.757	31.56	63.422	26.247	88.009	134.8	171.56	367.81	72.809	221.32	95.619	76.496	59.999	52.124	91.265	97.003
	50	49.015	43.468	64.394	65.488	64.964	78.482	219.97	244	102.76	37.108	72.718	29.984	107.59	166.04	193.47	439.91	75.664	276.84	104.48	90.134	70.509	59.567	101.25	105.16
	60	56.61	49.515	69.448	72.626	69.8	89.455	251.56	279.91	117.09	43.114	84.36	34.383	114.02	180.53	205.79	518.57	79.608	331.82	118.13	102.18	79.68	69.934	106.43	126.27
		Fig. 4c (IV-curves of neighboring microglial cells 8 weeks after MCAo)								Supplementary Fig. 6b (IV-curves of neighboring microglial cells 8 weeks after MCAo)
	mV	Neighbors A		Neighbors B		Neighbors C		Nrighbors D		Nrighbors E		Nrighbors F
	-170	-446.777	-1138.31	-381.47	-321.655	-610.962	-100.098	-637.207	-349.731	-895.996	-628.662	-390.015	-1068.12
	-160	-467.529	-1147.46	-375.977	-306.396	-575.561	-122.681	-686.035	-386.963	-847.168	-598.145	-488.281	-966.186
	-150	-411.987	-1129.15	-369.873	-285.034	-546.875	-133.057	-736.084	-397.339	-776.367	-573.12	-530.395	-857.544
	-140	-392.456	-1030.88	-333.862	-238.037	-499.878	-136.719	-708.008	-382.69	-692.139	-512.085	-528.564	-739.136
	-130	-313.721	-878.906	-283.203	-210.571	-423.584	-125.732	-619.507	-330.811	-574.951	-438.232	-482.788	-606.689
	-120	-252.686	-686.645	-227.051	-171.509	-329.59	-102.539	-499.878	-265.503	-453.491	-339.355	-394.897	-480.957
	-110	-183.105	-469.971	-164.185	-124.512	-226.44	-78.125	-354.614	-195.312	-317.993	-239.258	-286.255	-328.369
	-100	-126.953	-256.958	-97.6562	-84.8389	-128.174	-50.0488	-203.857	-123.291	-188.599	-137.939	-161.743	-188.599
	-90	-69.5801	-102.539	-44.5557	-50.0488	-54.3213	-26.8555	-83.0078	-62.2559	-83.6182	-62.2559	-62.8662	-92.7734
	-80	-37.2314	-28.6865	-17.7002	-23.8037	-17.7002	-15.8691	-19.5312	-20.1416	-21.9727	-22.583	-17.0898	-54.3213
	-70	-21.9727	-4.27246	-5.49316	-7.32422	-4.88281	-12.207	6.10352	6.71387	3.66211	-7.93457	0.610352	-9.76562
	-60	-9.76562	-1.2207	-0.610352	4.88281	-0.610352	-8.54492	16.4795	25.0244	12.207	-4.27246	7.93457	-2.44141
	-50	-6.10352	-4.88281	1.83105	13.4277	-1.2207	-7.32422	19.5312	39.0625	12.8174	-3.05176	10.9863	-6.10352
	-40	1.83105	-4.88281	4.88281	20.752	-1.2207	-5.49316	23.1934	51.2695	13.4277	-2.44141	14.6484	0.610352
	-30	10.9863	-2.44141	8.54492	27.4658	1.2207	-4.27246	28.0762	62.8662	15.8691	1.2207	18.3105	3.05176
	-20	25.0244	6.10352	12.8174	34.79	3.66211	0	38.4521	70.1904	29.2969	16.4795	26.2451	9.76562
	-10	37.8418	12.207	17.0898	42.1143	7.32422	4.27246	44.5557	81.7871	45.7764	29.2969	35.4004	15.8691
	0	50.0488	23.1934	21.9727	49.4385	10.376	8.54492	53.7109	93.9941	59.8145	39.0625	43.9453	21.3623
	10	67.1387	34.1797	28.6865	56.7627	14.6484	11.5967	64.6973	104.37	73.8525	48.8281	51.2695	28.0762
	20	84.2285	41.5039	36.6211	67.749	17.0898	16.4795	69.5801	114.136	87.8906	64.0869	59.2041	30.5176
	30	108.032	53.1006	42.1143	72.6318	20.752	16.4795	83.0078	128.784	102.539	65.918	59.8145	35.4004
	40	133.667	59.8145	50.0488	81.1768	27.4658	21.3623	94.6045	141.602	129.395	70.1904	64.6973	42.1143
	50	155.029	71.4111	53.1006	87.2803	32.3486	22.583	109.863	147.095	155.029	74.4629	69.5801	46.9971
	60	197.144	79.9561	62.2559	92.7734	34.79	25.6348	113.525	162.964	181.274	84.2285	73.2422	61.6455
	Supplementary Fig. 6a (IV-curves of microglial cells belonging to the same clones 1 week after stroke)
	mV	Clone A			Clone B			Clone C		Clone D		Other cells
	-170	-158.42	-141.68	-199.33	-144.23	-244.27	-179.33	-255.79	-189.23	-226.93	-385.19	-235.45	-145.09	-439.2	-170.15	-166.63	-220.9	-468.35	-163.93	-187.71	-328.03	-500.04	-156.39	-245.54	-112.38	-77.397	-390.99	-130.99	-165.1	-238.94	-217.09
	-160	-170.96	-146.09	-221.56	-173.71	-262.73	-216.74	-231	-253.54	-280.87	-389.79	-242.03	-141.43	-453.02	-188.3	-203.84	-240.75	-485.31	-209.6	-185.71	-398.62	-502.44	-196.54	-291.22	-121.41	-81.645	-464.6	-116.04	-190.26	-280.68	-214.61
	-150	-182.14	-151.23	-224.48	-194.75	-255.79	-229.13	-203.89	-278.82	-310.23	-384.22	-244.21	-151.07	-466.36	-182.63	-228.28	-237.89	-480.98	-233.63	-175.57	-410.99	-484.73	-216.03	-339.49	-115.77	-87.035	-516.26	-114.41	-200.74	-319.27	-238.02
	-140	-172.35	-144.23	-215.47	-190.94	-258.95	-231.68	-172.01	-284.02	-305.58	-355.92	-230.44	-141.8	-442.75	-168.14	-229.85	-223.93	-442.25	-219.03	-157.1	-385.01	-445.17	-220.36	-337.59	-111.99	-90.005	-500.9	-116.44	-190.05	-301.29	-215.75
	-130	-157.32	-134.43	-192.27	-183.06	-237.88	-213.5	-141	-255.16	-276.89	-304.32	-207.42	-131.26	-396.8	-147.92	-210.6	-192.45	-395.67	-235.34	-138.42	-337.89	-395.98	-202.78	-310.99	-101.06	-81.878	-461.12	-97.142	-174.23	-268.35	-202.27
	-120	-133.28	-116.81	-161.71	-160.38	-205.48	-180.63	-109.65	-208.87	-228.18	-248.28	-176.68	-114.31	-338.6	-129	-176.96	-156.92	-346.55	-185.77	-112.64	-273.4	-333.03	-172.05	-262.53	-91.046	-69.939	-380.11	-92.531	-146.17	-219.77	-178.24
	-110	-103.51	-97.282	-125.29	-127.79	-162.31	-136.55	-79.193	-149.23	-165.25	-184.08	-139.08	-92.899	-265.84	-100.14	-131.74	-118.12	-305.58	-150.02	-85.77	-196.48	-270.39	-129.95	-198.76	-83.25	-53.154	-274.92	-62.145	-110.98	-160.42	-134.1
	-100	-72.502	-73.323	-86.434	-84.262	-114.51	-87.911	-47.839	-84.241	-94.882	-122.4	-93.426	-68.461	-183.6	-74.999	-78.39	-77.476	-246.58	-80.045	-59.893	-115.25	-197.14	-79.604	-120.22	-60.167	-35.191	-160.7	-52.243	-69.715	-93.9	-90.312
	-90	-48.695	-55.332	-55.003	-49.057	-74.331	-51.219	-31.638	-35.657	-38.766	-69.574	-62.815	-50.54	-109.46	-53.532	-36.843	-44.821	-190.82	-46.382	-38.853	-49.502	-149.28	-36.531	-54.09	-40.46	-22.541	-65.324	-28.423	-38.984	-42.288	-56.691
	-80	-34.261	-44.815	-36.184	-31.757	-50.682	-29.798	-8.0337	-10.673	-11.422	-39.359	-46.991	-42.237	-65.598	-37.059	-16.445	-23.778	-158.14	-24.408	-24.386	-15.323	-114.75	-16.441	-25.892	-25.58	-13.57	-19.922	-21.813	-23.031	-16.802	-46.659
	-70	-24.971	-36.967	-25.118	-29.057	-40.799	-21.015	1.2831	2.2462	0.37042	-23.955	-36.219	-34.767	-42.775	-23.43	-6.1645	-11.755	-132.57	-8.5209	-14.224	-0.19083	-89.757	-7.1899	-14.6	-21.346	-7.993	-1.6828	-13.981	-13.177	-3.1969	-30.269
	-60	-16.612	-30.683	-17.586	-22.312	-29.379	-11.804	7.6251	9.1139	6.1163	-11.44	-28.957	-29.096	-32.642	-14.45	-1.5258	-3.7538	-113.48	-1.7204	-6.1767	5.204	-69.484	-2.7494	-9.6108	-16.471	-3.8911	3.7625	-9.7594	-9.3729	3.221	-17.175
	-50	-9.4718	-24.229	-12.178	-15.605	-19.899	-4.3606	11.693	15.293	9.4563	-0.4639	-22.703	-23.699	-25.126	-5.6648	2.4346	2.7496	-96.094	2.4645	0.15688	7.1975	-47.855	0.17315	-5.3383	-12.717	0.088322	5.7187	-5.562	-6.7621	7.629	-10.944
	-40	-2.3792	-18.541	-6.6072	-9.1486	-12.448	1.6608	15.052	22.018	12.784	8.4008	-16.774	-18.148	-20.119	0.73167	5.0928	9.1456	-76.814	6.8888	6.7764	10.181	-30.492	3.3306	-1.579	-6.5646	4.2113	7.6628	-1.5472	-3.6792	11.496	-3.9256
	-30	5.8014	-10.6	-1.0861	-0.67736	11.166	31.475	18.266	26.923	18.033	16.227	-8.6481	-12.277	-13.332	8.5114	22.427	19.879	-54.035	19.769	17.392	32.496	-11.125	6.3415	7.4247	8.7885	17.106	20.697	2.4096	4.0599	20.616	5.5
	-20	12.762	-2.5454	5.2027	27.067	55.269	115.57	20.75	33.496	44.667	26.594	-1.4094	-5.4617	-1.7724	15.54	84.111	53.089	-22.105	59.066	47.544	70.672	12.106	11.781	26.441	40.524	51.176	122.48	7.4377	18.032	40.431	15.514
	-10	21.479	3.5362	11.698	36.419	72.769	169.59	25.543	40.68	59.707	34.81	6.2861	2.2958	12.378	22.206	121.16	81.951	5.2217	79.86	78.834	87.401	31.403	17.167	36.712	52.851	67.397	205.48	12.851	30.851	54.341	28.643
	0	27.737	8.5802	17.668	45.905	89.476	197.87	29.262	46.251	65.517	43.24	14.282	8.7363	22.095	29.541	132.76	96.147	38.755	96.078	98.908	98.5	49.227	21.332	44.473	70.183	84.83	243.42	16.746	40.536	59.66	38.528
	10	36.994	16.028	24.501	52.946	99.862	214.6	34.507	52.134	77.509	53.917	23.566	16.73	32.838	36.194	149.1	109.8	74.501	107.84	117.72	113.33	64.933	27.289	53.552	82.115	95.57	280.31	23.412	41.484	67.172	49.506
	20	42.81	22.034	30.073	63.934	113	234.63	38.782	59.48	84.677	63.359	31.969	22.925	40.378	42.259	167.76	123.23	116.28	119.37	133.53	120.62	83.16	33.086	61.17	93.689	103.9	297.98	29.681	51.31	78.077	62.602
	30	49.957	27.926	33.243	78.665	125.17	257.38	42.848	67.438	95.453	70.098	42.434	32.321	53.715	49.228	166.18	129.2	168.54	140.42	154.48	135.28	97.182	36.268	72.676	102.22	108.86	338.23	33.504	60.198	90.328	72.062
	40	57.969	33.408	38.727	81.546	135.7	272.33	48.426	75.683	101.8	84.769	52.577	40.171	64.11	54.844	168.44	133.13	223.65	152.4	168.42	143.53	117.07	37.909	78.904	119.33	109.02	359.47	39.081	64.815	96.667	90.11
	50	64.721	43.089	43.797	86.108	142.94	288.38	52.35	85.008	108.9	92.294	63.9	48.086	74.984	60.844	192.1	133.17	292.15	156.17	189.92	153.11	133.77	47.209	88.783	144.05	125.7	374.05	49.312	75.995	106.96	102.26
	60	72.806	49.079	49.671	99.93	150.54	297.06	55.862	92.02	114.12	100.86	75.776	59.544	89.999	65.164	191.89	141.52	365.61	174.32	194.91	165.06	146.08	51.418	101.99	171.51	120.12	398.58	59.882	79.318	115.09	115.61

## Sheet: Fig. 5b 
Surface/Vol	Sphericity	Elli.R3	Longest Shortest Path	skeleton_length	Grouping
1.47661	0.016	8.198	97.615	209.744	Contralateral
1.7447	0.007	9.656	97.215	390.262	Contralateral
1.91718	0.004	12.736	94.79	496.228	Contralateral
1.64456	0.007	9.224	94.269	396.045	Contralateral
1.95135	0.006	9.907	84.643	373.226	Contralateral
1.7936	0.003	12.146	95.059	594.067	Contralateral
0.974672	0.026	10.294	72.283	217.715	2d
1.29343	0.026	6.426	51.838	150.197	2d
0.858484	0.074	6.29	51.472	69.5501	2d
0.815055	0.081	7.251	52.048	73.1448	2d
0.645917	0.17	6.767	27.533	77.8336	2d
0.972226	0.032	7.696	69.564	230.219	2d
1.33716	0.072	4.682	43.266	56.4216	2d
0.843456	0.036	7.591	81	230.688	2d
1.76857	0.005	14.246	139.175	522.017	Contralateral
1.90611	0.004	11.588	128.112	617.98	Contralateral
1.95387	0.007	11.276	49.139	288.985	Contralateral
1.87601	0.002	13.607	108.213	853.2	Contralateral
0.848923	0.062	7.731	52.154	156.449	2d
0.598299	0.168	8.5	47.628	69.0812	2d
0.986207	0.045	7.785	72.37	172.547	2d
0.93464	0.036	10.615	87.563	216.621	2d
0.7821	0.169	5.817	31.671	77.9899	2d
0.661004	0.184	6.83	34.939	62.517	2d
0.993191	0.066	6.44	44.718	120.814	2d
0.743898	0.125	8.418	50.325	108.936	2d
0.780558	0.126	5.944	51.357	100.027	2d
0.802439	0.169	5.751	36.286	52.6705	2d
0.975458	0.097	6.857	41.048	82.835	2d
0.998374	0.061	6.061	63.84	149.259	2d
1.03392	0.103	5.303	30.353	72.2071	2d
1.90986	0.005	11.991	77.544	464.97	Contralateral
1.73519	0.024	8.793	51.003	143.945	Contralateral
1.9333	0.006	9.726	101.582	393.388	Contralateral
1.79933	0.003	13.105	99.108	811.314	Contralateral
1.66089	0.023	8.074	59.805	140.663	Contralateral
1.41748	0.024	6.927	48.377	167.545	Contralateral
1.85229	0.005	10.234	85.208	548.43	Contralateral
1.79362	0.012	9.125	68.712	248.349	Contralateral
1.44128	0.059	4.878	36.277	70.6442	Contralateral
1.80192	0.018	7.483	43.314	160.043	Contralateral
1.65474	0.005	11.029	87.746	538.74	Contralateral
1.20564	0.071	5.571	43.407	89.243	2d
1.32877	0.03	8.623	43.858	123.471	2d
1.00775	0.031	8.413	70.426	212.401	2d
1.25262	0.034	5.3	59.631	164.732	2d
1.30925	0.061	5.515	40.511	94.7132	2d
1.15123	0.072	5.89	40.61	83.3038	2d
1.00917	0.029	7.844	61.846	204.743	2d
0.911712	0.111	5.596	30.492	47.8255	2d
0.8096	0.112	5.367	37.112	62.0481	2d
1.41485	0.021	6.994	51.956	224.28	2d
0.945169	0.046	10.391	40.41	134.88	2d
0.85766	0.046	7.477	74.735	184.894	2d
1.59744	0.02	7.617	45.024	144.727	Contralateral
1.76558	0.006	11.572	83.002	366.506	Contralateral
1.6665	0.009	11.136	84.831	310.553	Contralateral
1.62558	0.014	11.509	73.323	190.364	Contralateral
1.33408	0.024	7.841	45.768	171.453	Contralateral
1.54501	0.019	10.242	82.107	161.763	Contralateral
1.77588	0.006	11.746	65.473	357.441	Contralateral
1.86247	0.004	12.416	79.618	490.133	Contralateral
1.75776	0.006	10.919	95.862	383.073	Contralateral
1.76034	0.004	12.239	84.847	517.328	Contralateral
1.81986	0.003	11.799	119.19	645.175	Contralateral
1.75307	0.004	9.982	114.583	615.323	Contralateral
1.74913	0.004	12.608	116.331	530.925	Contralateral
1.84604	0.006	9.719	76.713	379.634	Contralateral
1.72831	0.004	11.841	99.33	527.018	Contralateral
1.55878	0.005	12.205	104.71	538.427	Contralateral
1.15284	0.029	9.721	71.414	172.859	2d
0.990128	0.028	8.114	80.281	208.181	2d
0.976284	0.039	9.29	71.424	157.543	2d
1.16979	0.032	8.769	67.905	159.887	2d
0.815383	0.093	6.823	41.778	90.8059	2d
1.14392	0.033	7.155	64.195	148.165	2d
0.725892	0.112	6.343	47.105	104.56	2d
1.05889	0.026	8.599	83.667	202.555	2d
0.869986	0.121	5.695	32.05	55.0149	2d
1.01685	0.029	7.245	62.989	252.725	2d
0.838789	0.044	8.495	65.177	210.213	2d
1.65676	0.033	7.39	58.329	107.529	Contralateral
1.86009	0.003	8.557	126.518	873.362	Contralateral
1.82821	0.006	10.354	89.967	445.59	Contralateral
1.72334	0.007	8.893	87.961	462	Contralateral
1.81861	0.006	9.808	102.715	541.553	Contralateral
1.69082	0.017	9.135	50.139	210.995	Contralateral
1.83013	0.007	8.051	76.329	451.998	Contralateral
1.80912	0.006	7.293	109.918	478.255	Contralateral
1.75101	0.006	8.625	91.016	530.3	Contralateral
1.69804	0.011	6.76	108.816	334.153	Contralateral
0.89408	0.046	8.096	71.082	177.704	2d
1.31442	0.024	10.003	55.596	195.834	2d
1.47846	0.056	5.054	38.48	80.8032	2d
0.945869	0.04	9.306	67.102	198.335	2d
1.14518	0.066	4.907	47.693	87.68	2d
0.671354	0.151	6.371	40.421	95.9635	2d
0.948652	0.071	7.001	38.842	147.54	2d
1.1484	0.069	5.416	36.384	88.3052	2d
0.789435	0.164	5.885	33.495	71.4256	2d
1.08042	0.054	6.769	47.17	126.128	2d
1.2654	0.073	4.356	32.267	79.3965	2d
0.878097	0.169	5.381	31.834	42.5115	2d
0.938576	0.069	7.174	62.241	132.223	2d
0.988691	0.036	12.318	57.33	225.374	2d
1.2719	0.069	6.119	47.887	79.2402	Contralateral
1.6652	0.007	10.755	90.295	454.967	Contralateral
1.3586	0.029	10.426	63.787	146.602	Contralateral
1.08695	0.074	5.896	32.394	89.243	8w
1.06856	0.107	5.335	39.148	81.272	8w
1.26836	0.035	5.153	45.549	105.654	8w
1.31077	0.058	5.538	28.59	78.9277	8w
1.23752	0.062	5.26	48.394	79.5528	8w
1.17525	0.309	3.68	14.818	19.8491	8w
1.12488	0.098	4.284	23.323	34.228	8w
1.12391	0.256	3.146	10.797	15.0041	8w
1.19318	0.094	4.59	22.174	62.3607	8w
1.20121	0.044	6.08	36.319	102.059	8w
1.23286	0.059	5.505	33.214	76.427	8w
1.38865	0.128	2.653	27.56	36.5724	8w
1.09285	0.043	6.133	40.454	141.288	8w
1.07192	0.203	3.58	19.75	20.1617	8w
0.951049	0.18	4.567	18.909	49.5447	8w
1.11609	0.202	3.117	18.951	25.1631	8w
1.34242	0.213	3.297	15.993	15.3167	8w
1.1234	0.083	4.272	38.152	73.3011	8w
0.737766	0.1	6.191	40.325	80.0217	8w
0.888436	0.14	6.233	28.007	54.2335	8w
1.23064	0.132	4.076	28.525	39.3857	8w
0.919308	0.074	7.579	34.178	64.0799	8w
0.932982	0.154	6.233	30.945	34.228	8w
1.17177	0.102	3.055	34.147	64.2362	8w
0.937996	0.071	7.624	50.689	96.5887	8w
1.13634	0.033	6.027	44.98	146.133	8w
1.2781	0.085	3.92	40.021	55.7964	8w
0.920821	0.06	6.56	36.641	111.124	8w
0.62132	0.172	7.287	27.118	73.1448	8w
1.07344	0.061	6.878	36.06	62.0481	8w
1.22765	0.056	5.667	28.936	60.954	8w
0.878415	0.078	7.053	39.65	94.4006	8w
0.983583	0.066	6.06	40.977	116.594	8w
0.981721	0.095	4.841	17.745	34.3843	8w
0.945418	0.087	7.686	31.619	68.4561	8w
0.91048	0.16	4.513	23.193	48.9195	8w
0.881908	0.101	6.845	26.423	74.2389	8w
0.840837	0.25	4.646	18.328	35.791	8w
1.04333	0.144	4.419	24.644	54.0772	8w
1.15806	0.145	3.663	15.12	24.2253	8w
1.12572	0.154	4.463	26.561	39.0731	8w
1.03526	0.085	6.211	34.569	78.1462	8w
1.26868	0.159	2.683	23.975	31.2585	8w
1.29829	0.049	7.319	27.614	75.4892	8w
0.9627	0.116	5.655	33.575	70.1753	8w
1.02912	0.125	5.345	29.668	55.7964	8w
1.15924	0.09	5.017	25.307	64.0799	8w
0.860186	0.597	3.853	7.638	6.56428	8w
1.21411	0.069	5.29	30.205	82.9913	8w
1.11728	0.075	6.214	33.068	86.7423	8w
1.15383	0.059	5.056	38.469	102.528	8w
1.1291	0.104	5.231	25.107	67.0494	8w
1.37422	0.034	8.003	42.186	149.259	8w
1.15568	0.329	3.275	16.073	14.5352	8w
1.12057	0.039	5.754	46.857	135.037	8w
1.26726	0.036	7.913	36.179	109.248	8w
1.33356	0.046	6.416	39.994	96.5887	8w
1.43921	0.048	5.728	30.082	98.1516	8w
1.26908	0.07	4.329	33.159	93.7754	8w
1.14074	0.098	5.173	34.879	59.2348	8w
1.04476	0.174	3.159	18.726	17.661	8w
1.16047	0.228	3.564	18.607	26.8823	8w
1.14916	0.333	2.717	10.748	16.2544	8w
1.12059	0.088	3.902	39.148	78.9277	8w
1.32307	0.039	7.15	68.488	120.814	8w
1.32906	0.031	7.221	43.671	144.883	8w
1.27641	0.041	7.419	41.191	124.409	8w
1.06494	0.244	4.472	24.606	30.7896	8w
1.82838	0.009	12.669	67.123	311.96	Contralateral
1.54621	0.078	3.976	36.027	56.5778	Contralateral
1.67804	0.023	5.866	44.265	165.67	Contralateral
1.77581	0.007	11.502	93.953	406.517	Contralateral
1.73975	0.02	6.949	56.435	183.487	Contralateral
2.06886	0.007	8.855	80.398	346.657	Contralateral
1.49377	0.059	5.327	40.146	83.3038	Contralateral
1.79369	0.015	7.595	53.348	190.364	Contralateral
1.76394	0.005	9.913	98.583	589.535	Contralateral
1.61394	0.043	5.717	58.148	85.3357	Contralateral
0.967258	0.097	6.338	34.756	74.0826	8w
1.23018	0.136	2.917	33.537	36.5724	8w
1.34859	0.053	5.807	41.948	105.497	8w
0.972569	0.074	5.016	42.917	69.8627	8w
1.03497	0.087	5.884	32.309	63.9236	8w
1.13688	0.084	4.779	26.924	56.7341	8w
0.759421	0.191	3.373	39.619	42.5115	8w
1.46071	0.053	5.71	27.129	70.4879	8w
1.28597	0.03	7.427	52.56	169.265	8w
1.5062	0.125	2.492	23.787	24.5379	8w
1.74499	0.046	3.814	45.843	69.8627	8w
1.25437	0.03	7.739	51.264	178.799	8w
1.24644	0.067	5.361	46.869	78.4588	8w
0.842005	0.173	3.751	37.462	46.2626	8w
1.17444	0.079	4.892	28.654	61.2666	8w
1.22072	0.028	7.054	56.253	219.122	8w
1.3164	0.072	5.334	41.327	71.2693	8w
1.30691	0.066	5.732	31.84	74.7078	8w
1.47084	0.062	5.192	35.241	68.6124	8w
1.2588	0.097	3.865	18.86	32.6651	8w
0.944063	0.093	4.621	29.958	65.9554	8w
1.2347	0.044	6.584	37.505	98.4642	8w
1.53588	0.066	4.296	37.731	55.0149	8w
1.02218	0.047	8.532	42.124	111.749	8w
1.32359	0.236	2.771	12.144	13.5974	8w
1.21357	0.063	4.803	42.064	89.3993	8w
0.966171	0.119	6.526	30.626	41.5738	8w
1.37817	0.044	6.621	53.982	105.341	8w
1.42511	0.06	5.668	30.876	66.7369	8w
1.07347	0.057	6.566	35.004	95.3384	8w
1.32029	0.048	5.764	49.513	103.934	8w
1.84061	0.012	9.056	58.494	243.816	8w
1.83828	0.008	8.65	81.988	409.174	8w
1.77516	0.008	9.589	84.541	350.876	8w
1.70985	0.014	9.409	72.077	244.91	Contralateral
1.53219	0.053	5.825	65.237	66.4243	Contralateral
1.76235	0.005	11.42	101.841	592.348	Contralateral
1.66721	0.01	8.601	82.884	292.892	Contralateral
1.56771	0.012	9.852	126.507	298.675	Contralateral
1.38723	0.017	8.356	72.713	267.729	Contralateral
1.05085	0.181	4.014	28.277	33.2903	Contralateral
1.59911	0.015	7.652	93.034	220.529	Contralateral
1.07634	0.25	2.782	23.35	23.2876	Contralateral
1.16918	0.097	4.753	39.414	77.521	Contralateral
1.58704	0.019	6.434	81.985	195.522	8w
1.59117	0.028	6.781	46.811	134.099	8w
1.12693	0.051	5.622	34.6	110.186	8w
1.5201	0.033	4.573	50.264	112.531	8w
1.13464	0.035	7.147	48.774	183.8	8w
0.883271	0.09	5.934	43.386	76.5833	8w
1.46849	0.061	4.56	37.109	66.1117	8w
1.33309	0.109	4.169	29.824	41.4175	8w
1.44846	0.02	6.774	63.146	202.086	8w
1.18095	0.169	3.426	19.662	29.0704	8w
1.15031	0.074	3.806	32.731	65.6428	8w
1.2616	0.032	5.809	55.933	178.955	8w
1.19496	0.172	3.453	24.606	25.632	8w
1.37348	0.049	4.904	39.192	102.84	8w
1.27091	0.043	6.448	50.146	114.562	8w
1.61356	0.061	4.414	24.366	57.5156	8w
1.31235	0.112	3.311	31.215	41.5738	8w
1.34787	0.065	4.314	40.119	74.8641	8w
1.22725	0.038	4.974	54.813	173.016	8w
1.82385	0.035	6.636	47.175	97.6827	8w
1.35937	0.131	2.178	25.254	27.6638	8w
1.24028	0.025	4.616	63.275	252.569	8w
1.82782	0.015	5.904	59.418	227.249	8w
1.47703	0.073	4.791	49.73	66.4243	8w
1.79186	0.022	5.903	74.67	181.143	Contralateral
1.77488	0.015	6.708	90.232	263.04	Contralateral
1.81656	0.01	9.156	82.479	394.326	Contralateral
1.73722	0.023	7.46	61.448	189.895	Contralateral
1.75037	0.017	9.031	69.329	237.096	Contralateral
1.83245	0.006	9.916	85.314	508.107	Contralateral
1.53035	0.049	4.124	71.901	106.591	Contralateral
1.58932	0.025	7.212	63.868	164.732	Contralateral
1.55824	0.02	6.426	41.209	144.258	8w
1.46409	0.015	9.553	61.665	210.057	8w
1.24925	0.015	12.275	95.833	340.092	8w
1.8921	0.009	7.44	61.889	361.348	8w
1.64048	0.013	9.8	58.133	272.73	8w
1.45686	0.019	6.771	59.474	220.372	8w
1.32587	0.022	8.468	42.216	211.464	8w
1.26692	0.035	7.656	64.237	118.313	8w
1.06636	0.058	5.714	41.463	85.6482	8w
1.38106	0.023	7.734	59.916	185.519	8w
1.51606	0.02	7.085	51.333	151.135	8w
1.70892	0.011	6.911	68.45	273.355	8w
1.07951	0.064	5.985	39.265	88.7741	8w
1.39718	0.024	8.364	41.575	142.695	8w
1.82463	0.006	11.821	69.595	493.884	8w
1.35636	0.085	3.716	34.082	42.3552	8w
1.07857	0.102	5.188	36.487	75.1766	8w
0.823669	0.272	3.374	24.908	26.5697	8w
1.43069	0.026	6.673	54.77	181.143	8w
1.36244	0.052	4.471	44.874	103.153	8w
1.14966	0.064	6.078	53.19	86.4297	8w
1.37976	0.062	4.289	32.713	68.4561	8w
1.33644	0.043	5.429	47.369	108.78	8w
1.28174	0.216	2.414	17.163	21.8809	8w
1.35095	0.048	3.719	50.846	112.062	8w
1.283	0.068	3.355	27.562	70.8005	8w
1.05759	0.045	6.904	71.044	136.912	8w
1.25956	0.113	2.678	28.023	34.6969	8w
1.32942	0.053	4.58	42.885	83.3038	8w
1.27031	0.112	2.734	26.332	47.3566	8w
0.921103	0.434	2.534	7.611	6.40799	8w
1.12363	0.132	4.197	32.541	51.1076	8w
1.29995	0.068	3.454	32.849	68.9249	8w
1.24933	0.025	7.575	47.277	172.391	8w
1.04811	0.058	5.722	62.719	125.19	8w
1.00302	0.121	5.35	28.165	57.6719	8w
1.15933	0.123	2.918	29.717	41.5738	8w
1.32537	0.051	3.903	45.081	87.2112	8w
1.46559	0.035	5.719	47.702	131.286	8w
1.09671	0.083	4.541	34.48	73.6137	8w
1.20921	0.071	3.382	30.498	96.745	8w
1.36952	0.022	5.988	88.502	237.877	8w
1.16994	0.097	4.731	33.814	61.8918	8w
1.28277	0.067	3.321	40.21	84.7105	8w
1.57219	0.019	5.98	62.79	205.993	8w
1.31475	0.08	3.092	43.899	62.8295	8w
1.17899	0.092	3.75	39.559	65.0176	8w
1.09547	0.064	5.481	47.071	113.312	8w
1.27452	0.041	3.447	49.998	130.348	8w
1.10229	0.084	4.574	38.626	96.745	8w
1.39748	0.041	6.084	45.788	132.067	8w
0.996664	0.073	5.131	64.568	88.4615	8w
0.901296	0.313	3.173	13.637	14.8478	8w
1.43286	0.059	4.36	34.901	71.113	8w
1.34562	0.067	3.663	42.394	83.929	8w
1.37605	0.026	6.186	53.126	167.858	8w
1.27914	0.066	4.625	42.566	104.403	8w
1.66332	0.023	8.043	67.585	153.948	8w
1.58198	0.065	2.348	39.137	62.9858	8w
1.29728	0.032	5.545	45.984	147.54	8w
1.54453	0.023	6.735	54.08	175.204	8w
1.35591	0.036	6.031	44.518	145.352	8w
1.36888	0.029	8.42	40.841	181.299	8w
1.38098	0.053	3.923	44.386	102.372	8w
1.17475	0.136	4.565	43.29	41.2612	8w
1.43035	0.037	6.178	42.846	135.662	8w
1.33224	0.033	7.715	44.556	128.629	8w
1.30322	0.073	4.034	39.796	95.4947	8w
1.1079	0.14	3.363	14.921	36.5724	8w
1.42219	0.032	6.947	39.731	128.785	8w
1.21562	0.074	5.875	37.682	90.4933	8w
0.957525	0.119	5.487	31.144	66.1117	8w
1.36327	0.04	7.079	43.008	114.719	8w
1.28383	0.063	4.967	36.379	77.8336	8w
1.0582	0.226	4.008	20.197	31.2585	8w
1.48669	0.041	5.348	46.661	122.69	8w
1.23261	0.065	5.335	51.814	82.3661	8w
1.07284	0.261	2.849	18.817	27.6638	8w
1.15395	0.159	4.249	23.921	38.2916	8w
1.75951	0.022	5.893	67.115	175.204	Contralateral
1.76862	0.01	11.193	93.373	346.657	Contralateral
1.64454	0.023	6.133	72.519	184.112	Contralateral
1.88636	0.011	8.29	103.378	300.081	Contralateral
1.78086	0.01	8.54	87.177	273.043	Contralateral
1.60428	0.014	11.407	72.136	293.83	Contralateral
1.83419	0.01	7.827	88.712	326.807	Contralateral
1.02272	0.074	6.879	55.474	103.153	1w
1.07454	0.061	5.268	63.056	120.658	1w
1.2173	0.031	7.802	62.812	182.393	1w
1.00234	0.044	9.135	69.097	149.728	1w
0.980393	0.065	6.057	51.008	110.186	1w
0.736477	0.085	8.979	43.444	89.8681	1w
0.741814	0.13	7.13	32.131	69.3938	1w
0.793557	0.111	7.249	41.687	98.3079	1w
0.878019	0.081	8.227	40.586	99.7146	1w
0.859825	0.08	7.801	44.227	98.1516	1w
0.725433	0.326	4.634	17.216	30.0081	1w
0.965941	0.069	8.284	46.152	120.814	1w
0.961261	0.038	7.911	74.435	199.585	1w
0.950177	0.081	6.33	39.541	102.84	1w
1.06171	0.042	8.111	63.491	164.263	1w
0.92541	0.058	6.781	62.268	127.691	1w
1.08457	0.025	10.168	53.881	238.658	1w
0.935288	0.057	6.027	70.433	133.943	1w
0.852095	0.035	9.959	66.617	243.035	1w
1.15689	0.142	4.456	29.55	53.1394	1w
0.918863	0.061	8.3	45.719	128.003	1w
1.04777	0.082	5.76	37.478	85.0231	1w
0.956952	0.051	6.072	64.601	139.257	1w
1.04364	0.076	5.368	42.883	101.434	1w
1.5588	0.077	4.431	31.91	49.5447	1w
0.877286	0.077	6.509	44.949	94.5569	1w
0.834187	0.116	5.865	29.28	52.9831	1w
1.02535	0.057	5.532	59.157	137.537	1w
1.23244	0.145	3.382	24.325	31.5711	1w
1.04981	0.05	8.059	44.371	101.277	1w
0.838555	0.147	4.113	31.365	61.8918	1w
1.37114	0.167	2.432	24.606	28.7578	1w
1.62929	0.066	3.61	40.508	59.7037	Contralateral
1.85172	0.01	10.119	91.567	339.936	Contralateral
1.73738	0.017	7.197	67.039	203.962	Contralateral
1.98844	0.007	8.585	67.651	426.522	Contralateral
1.88352	0.015	7.967	67.414	214.277	Contralateral
1.89443	0.009	8.041	93.48	364.005	Contralateral
1.58209	0.016	6.9	65.992	310.709	8w
1.26191	0.065	5.296	48.157	102.372	8w
1.52152	0.091	4.16	34.707	51.7328	8w
0.959931	0.156	3.711	22.81	57.9845	8w
0.958073	0.145	3.785	34.502	74.5515	8w
1.02655	0.1	4.294	35.236	77.6773	8w
1.23065	0.058	6.864	36.06	65.9554	8w
1.48239	0.111	3.183	29.409	46.8877	8w
0.993637	0.053	6.281	61.131	145.352	8w
1.26565	0.191	3.38	18.333	35.1658	8w
1.58684	0.07	3.661	43.591	59.5474	8w
1.38978	0.035	5.706	57.933	128.003	8w
1.14965	0.095	3.784	30.141	73.9263	8w
1.05719	0.17	4.217	18.893	40.3234	8w
1.2806	0.306	2.108	12.829	10.7842	8w
1.31453	0.076	5.168	41.984	67.362	8w
1.43331	0.081	4.982	25.566	69.8627	8w
1.01954	0.148	3.983	21.588	49.0758	8w
1.16894	0.066	5.434	29.969	91.5873	8w
1.01013	0.088	5.673	33.021	93.6191	8w
1.43977	0.089	3.942	27.976	52.358	8w
1.26553	0.037	8.707	51.687	131.598	8w
1.67291	0.015	5.466	74.211	298.831	8w
1.67644	0.017	6.644	60.644	216.465	8w
1.714	0.016	9.099	73.106	252.569	8w
1.33049	0.108	3.78	22.238	56.7341	8w
1.93824	0.009	10.417	97.316	389.481	Contralateral
1.63408	0.025	9.211	71.732	164.263	Contralateral
1.33835	0.052	6.406	49.729	112.687	Contralateral
1.78675	0.011	8.531	78.626	324.15	Contralateral
1.76532	0.01	9.262	93.52	317.742	Contralateral
1.78729	0.012	6.92	109.765	337.748	Contralateral
1.06123	0.055	6.867	43.863	133.317	1w
0.78224	0.104	6.288	43.79	121.752	1w
1.03793	0.053	6.294	50.814	154.573	1w
1.01786	0.055	5.552	42.273	146.915	1w
1.0102	0.067	6.486	49.125	106.591	1w
0.893064	0.17	5.333	27.252	40.636	1w
0.82643	0.076	7.243	47.197	131.911	1w
1.00766	0.092	5.022	38.48	77.0522	1w
0.990407	0.06	6.214	34.984	104.716	1w
1.01015	0.18	4.644	21.286	48.2944	1w
1.07524	0.081	5.179	42.113	97.839	1w
1.00364	0.086	5.31	29.82	88.7741	1w
1.02027	0.058	7.074	31.646	96.1198	1w
0.992257	0.032	9.978	63.398	238.658	1w
1.17694	0.026	7.052	50.053	188.489	1w
1.12494	0.044	6.889	38.994	98.3079	1w
1.21217	0.03	9.456	53.114	168.639	1w
0.847698	0.192	4.373	16.721	35.4784	1w
1.07157	0.047	7.807	56.735	167.233	1w
1.11909	0.092	5.711	38.076	76.8959	1w
0.992749	0.029	9.398	90.819	256.632	1w
1.11495	0.068	6.921	43.488	92.8377	1w
1.07354	0.042	9.16	47.978	172.391	1w
0.884648	0.118	6.906	35.506	79.8654	1w
1.03436	0.115	4.761	29.181	58.7659	1w
1.03863	0.132	4.866	26.687	57.5156	1w
0.998578	0.092	5.952	35.367	85.0231	1w
1.00891	0.059	6.722	46.592	144.57	1w
0.924069	0.138	4.772	39.501	70.4879	1w
0.918729	0.112	5.729	25.852	55.7964	1w
0.920543	0.042	8.638	47.078	229.75	1w
0.860402	0.1	7.192	43.796	103.466	1w
1.5787	0.023	5.223	53.158	253.194	1w
1.04416	0.08	5.718	38.518	105.966	1w
1.09693	0.151	3.634	29.235	38.9168	1w
1.09978	0.035	7.25	64.181	218.809	1w
0.823605	0.182	5.471	31.318	64.5488	1w
0.929202	0.108	6.035	31.543	64.7051	1w
1.33584	0.034	7.64	48.891	161.45	1w
1.33348	0.043	6.826	31.107	73.77	1w
0.862059	0.104	7.199	38.092	111.749	1w
0.991201	0.086	6.191	35.107	66.4243	1w
1.14641	0.156	4.428	15.676	29.6956	1w
1.18458	0.046	5.982	59.552	151.76	1w
1.27926	0.037	7.765	47.186	148.165	1w
1.01224	0.045	6.628	75.698	158.48	1w
0.854555	0.124	5.714	38.514	72.2071	1w
1.21546	0.04	6.461	54.547	166.139	1w
1.21782	0.035	6.372	51.553	124.878	1w
1.15588	0.051	6.605	43.493	137.537	1w
1.06987	0.106	5.675	37.322	73.1448	1w
0.986091	0.096	6.397	29.161	76.2707	1w
1.0678	0.043	6.391	61.377	178.173	1w
1.15826	0.055	5.427	32.232	80.3343	1w
1.11231	0.054	5.531	57.634	134.88	1w
1.27275	0.077	5.121	34.176	82.0535	1w
1.18471	0.099	5.42	29.987	72.0508	1w
1.30388	0.131	3.005	24.908	35.0095	1w
1.35538	0.065	5.323	49.688	83.6164	Contralateral
1.30223	0.079	3.598	48.523	70.9567	Contralateral
1.05516	0.083	5.717	45.429	86.4297	Contralateral
1.24199	0.107	4.245	38.228	61.2666	Contralateral
1.80006	0.011	7.032	90.366	301.332	Contralateral
1.25429	0.131	4.08	31.597	50.9513	Contralateral
1.40426	0.05	5.952	46.478	102.215	Contralateral
1.55013	0.014	6.658	68.765	267.573	Contralateral
0.839929	0.155	4.334	37.661	55.9527	1w
1.15431	0.079	5.387	41.019	79.2402	1w
1.02402	0.044	7.035	44.875	142.851	1w
1.1803	0.037	7.588	48.773	113.312	1w
1.27078	0.04	7.012	43.176	140.038	1w
0.965879	0.131	4.969	22.747	40.4797	1w
0.869354	0.054	8.572	52.806	170.515	1w
1.31766	0.046	5.322	44.69	115.5	1w
0.971984	0.04	7.482	49.453	169.265	1w
0.590423	0.381	5.256	20.369	30.0081	1w
1.23164	0.052	5.346	30.396	81.4283	1w
1.41574	0.05	5.316	26.402	79.8654	1w
0.975899	0.034	8.233	59.224	208.025	1w
0.888964	0.081	5.728	46.344	129.254	1w
1.14025	0.057	4.9	70.832	151.135	1w
1.28453	0.038	6.387	67.762	153.479	1w
0.943874	0.068	6.946	42.443	107.217	1w
0.979259	0.062	6.093	51.327	163.013	1w
1.13434	0.031	8.637	46.658	165.201	1w
0.743351	0.199	5.281	32.993	62.9858	1w
0.806175	0.248	4.648	25.383	46.1063	1w
1.21743	0.047	7.071	41.558	130.973	1w
1.04533	0.219	4.233	24.412	36.7287	1w
1.00161	0.284	3.968	16.667	25.632	1w
1.25556	0.058	5.044	39.608	84.8668	1w
0.939661	0.231	4.193	26.002	35.9473	1w
1.25888	0.068	5.441	42.292	82.835	1w
1.21932	0.029	9.089	71.049	174.735	1w
0.589829	0.265	6.883	26.672	55.0149	1w
1.16213	0.058	5.409	38.157	100.809	1w
0.915701	0.1	5.076	47.418	85.6482	1w
0.793354	0.098	7.357	36.4	105.966	1w
0.899384	0.166	4.438	30.887	55.4838	1w
1.0559	0.125	4.882	22.095	44.387	1w
1.0967	0.236	3.231	16.23	20.6306	1w
1.10212	0.056	6.103	53.917	120.814	1w
0.911472	0.049	7.049	69.85	191.614	1w
1.06012	0.046	6.738	46.177	153.323	1w
1.09085	0.093	5.026	28.795	82.0535	1w
1.12575	0.076	5.602	40.939	70.019	1w
1.21922	0.029	8.487	68.804	212.714	1w
1.07978	0.101	5.086	31.478	56.5778	1w
0.796803	0.317	4.825	20.585	17.5047	1w
1.12545	0.076	5.256	31.629	75.3329	1w
1.17879	0.1	4.026	27.576	57.203	1w
1.26783	0.046	6.41	41.449	125.815	1w
0.96283	0.133	5.003	27.614	65.3302	1w
1.29482	0.059	5.86	28.616	88.9304	1w
1.24192	0.039	7.084	31.791	122.377	1w
1.11803	0.06	6.886	35.156	111.28	1w
1.27994	0.032	8.125	52.402	182.55	1w
1.09096	0.042	7.491	40.894	147.853	1w
1.10615	0.085	5.365	30.88	82.835	1w
1.18845	0.035	7.585	64.364	172.234	1w
1.18816	0.07	5.134	36.433	85.8045	1w
0.887141	0.193	4.684	16.209	30.477	1w
1.08586	0.092	5.448	32.211	67.0494	1w
0.891467	0.442	3.373	15.006	17.9736	1w
1.91278	0.01	6.639	70.299	346.969	Contralateral
1.8961	0.005	10.204	85.817	590.942	Contralateral
1.86428	0.008	7.587	104.049	387.761	Contralateral
1.98086	0.006	10.673	86.715	455.905	Contralateral
1.81579	0.011	9.901	77.917	278.982	Contralateral
1.86662	0.008	9.265	98.342	403.547	Contralateral
2.05428	0.013	7.539	75.139	233.813	Contralateral
1.97679	0.007	8.65	114.055	420.583	Contralateral
1.97687	0.007	8.501	78.269	428.241	Contralateral
1.90606	0.007	8.569	109.315	458.406	Contralateral
1.27294	0.034	7.945	51.766	133.786	1w
1.12721	0.047	6.925	49.876	132.067	1w
1.23514	0.063	6.178	39.671	86.586	1w
0.927964	0.116	5.276	26.627	57.203	1w
1.2586	0.038	6.443	71.812	134.255	1w
0.935966	0.07	6.709	45.688	100.34	1w
1.22214	0.031	7.532	39.177	159.262	1w
1.26696	0.056	5.354	41.326	113.781	1w
1.314	0.066	4.909	38.824	65.1739	1w
1.25777	0.032	7.028	39.342	179.736	1w
1.16375	0.049	5.513	40.916	157.855	1w
0.990045	0.042	8.621	44.5	159.731	1w
1.3073	0.077	3.576	30.258	51.7328	1w
1.19971	0.03	7.327	64.747	169.265	1w
1.12273	0.03	7.841	39.202	167.858	1w
1.33083	0.051	5.066	35.602	67.6746	1w
1.157	0.057	7.119	37.288	92.8377	1w
1.17272	0.085	4.98	28.293	65.6428	1w
1.21079	0.126	3.778	27.442	41.8864	1w
1.13204	0.116	4.473	32.432	57.9845	1w
1.0091	0.081	6.491	40.571	98.3079	1w
1.10111	0.084	5.892	23.173	46.7314	1w
1.32937	0.042	6.049	61.501	122.69	1w
1.02245	0.062	7.532	46.451	73.9263	1w
1.10993	0.033	9.144	49.672	171.296	1w
0.973525	0.043	7.495	49.271	140.819	1w
1.2164	0.126	4.141	22.736	38.6042	1w
1.15381	0.063	7.329	36.06	103.934	1w
1.16583	0.129	4.373	22.93	32.5088	1w
0.924135	0.199	3.922	29.963	60.4852	1w
1.2269	0.043	5.607	46.974	143.32	1w
1.17651	0.039	6.649	63.717	170.202	1w
1.26583	0.047	7.592	31.572	116.125	1w
1.27059	0.057	6.238	42.064	98.9331	1w
0.858108	0.185	4.956	23.684	60.1726	1w
1.25155	0.042	5.629	52.477	176.767	1w
1.19772	0.024	9.997	50.162	214.589	1w
1.36956	0.078	4.866	27.808	46.8877	1w
1.10077	0.09	4.913	26.66	87.5237	1w
0.761784	0.152	5.042	34.368	105.966	1w
1.23761	0.087	6.034	27.404	60.954	1w
0.956075	0.107	5.019	35.591	95.1821	1w
0.973341	0.093	5.55	36.411	84.3979	1w
1.17219	0.14	3.859	20.143	45.1685	1w
1.33869	0.045	6.096	32.039	101.277	1w
1.38237	0.03	7.106	60.315	143.008	1w
1.30581	0.07	5.925	33.673	66.5806	1w
1.32359	0.03	6.877	43.386	156.449	1w
1.3325	0.032	6.187	42.74	188.02	1w
1.21132	0.068	6.334	24.461	80.0217	1w
1.38076	0.025	5.995	62.833	232.407	1w
1.21185	0.02	9.957	61.561	305.552	1w
1.39662	0.046	4.971	43.263	120.658	1w
1.44631	0.03	5.672	41.692	180.518	1w
1.49628	0.018	6.727	61.783	236.939	1w
1.14184	0.052	7.482	37.985	91.8999	1w
1.45916	0.021	5.087	63.824	252.881	1w
1.43013	0.035	4.978	36.681	110.968	1w
1.05921	0.072	5.841	33.582	97.5265	1w
1.36124	0.137	3.799	25.803	34.0717	1w
1.39071	0.046	4.279	62.629	132.536	1w
1.80536	0.005	8.963	93.372	656.115	Contralateral
1.65101	0.009	8.449	87.85	388.699	Contralateral
1.87589	0.006	10.761	117.474	504.512	Contralateral
1.65491	0.007	10.499	88.09	456.686	Contralateral
1.71226	0.004	10.269	102.726	714.256	Contralateral
1.5666	0.009	8.092	79.556	386.355	Contralateral
1.38503	0.048	6.434	51.876	84.7105	Contralateral
1.50282	0.022	6.197	66.245	188.176	Contralateral
1.01636	0.095	4.63	31.604	99.7146	1w
1.28541	0.022	6.264	66.128	258.351	1w
1.06608	0.058	5.34	46.365	131.598	1w
1.1891	0.029	9.231	44.176	184.581	1w
1.07318	0.055	5.844	41.461	122.69	1w
1.10321	0.075	6.02	35.258	89.7118	1w
1.12964	0.067	4.431	37.828	108.78	1w
0.947311	0.239	4.648	24.348	36.2598	1w
1.26925	0.092	5.292	23.814	63.1421	1w
0.970037	0.112	4.982	47.616	80.178	1w
1.11662	0.08	6.019	30.137	54.3898	1w
0.917123	0.11	5.315	34.174	80.6469	1w
0.901238	0.126	4.62	28.595	55.0149	1w
1.25875	0.101	4.958	23.707	39.6983	1w
0.999385	0.102	5.542	31.925	91.2748	1w
1.42134	0.034	6.813	53.597	144.57	1w
1.24498	0.125	3.986	22.633	34.5406	1w
1.11888	0.056	5.949	48.393	140.663	1w
1.28464	0.065	5.425	29.878	43.4493	1w
1.37392	0.037	6.247	48.263	98.9331	1w
1.29931	0.042	5.187	50.026	149.572	1w
1.40053	0.111	4.642	27.938	43.7619	1w
1.29426	0.041	5.584	53.97	179.736	1w
1.49378	0.042	4.77	68.014	145.039	1w
1.36215	0.064	5.447	32.336	76.427	1w
1.36952	0.027	5.591	41.067	210.995	1w
1.19322	0.056	4.592	48.21	116.907	1w
1.18945	0.074	4.902	37.177	79.3965	1w
1.25292	0.035	7.383	42.673	154.104	1w
0.98596	0.054	6.7	51.973	167.389	1w
1.13446	0.067	6.222	43.024	105.654	1w
1.11124	0.096	4.315	31.106	52.0454	1w
1.00187	0.076	5.265	51.477	114.719	1w
0.898953	0.065	5.764	47.137	155.042	1w
0.938601	0.131	6.467	32.6	73.3011	1w
0.924299	0.139	4.704	31.604	54.3898	1w
1.22058	0.026	7.796	61.33	203.493	1w
1.13573	0.073	6.564	51.589	91.4311	1w
1.22501	0.063	6.947	39.871	83.929	1w
1.33434	0.045	6.732	45.514	135.974	1w
0.947972	0.156	4.357	16.66	42.1989	1w
0.829002	0.113	6.341	46.431	78.9277	1w
1.05659	0.05	7.172	56.474	158.637	1w
0.884924	0.097	7.221	33.49	94.4006	1w
1.12526	0.13	4.367	25.738	36.1035	1w
1.0995	0.059	4.645	62.585	113.468	1w
0.957339	0.063	5.509	58.742	136.443	1w

## Sheet: Fig. 5c and Sup. Fig. 7c (UMAP)
Surface/Vol	Sphericity	Elli.R3	Longest Shortest Path	skeleton_length	UMAP1	UMAP2	Grouping
0.599568	0.0235294	0.50173	0.684108	0.234541	0.117332	8.4437	Contralateral
0.780825	0.00840336	0.621849	0.681068	0.442762	-0.775683	8.39316	Contralateral
0.897441	0.00336134	0.875597	0.662636	0.56499	-1.23655	8.51711	Contralateral
0.713121	0.00840336	0.586258	0.658676	0.449432	-0.736141	8.44625	Contralateral
0.920547	0.00672269	0.642528	0.58551	0.423112	-0.677679	8.39053	Contralateral
0.813892	0.00168067	0.82699	0.66468	0.677844	-1.39814	8.45371	Contralateral
0.260198	0.0403361	0.674411	0.491563	0.243735	3.93312	10.543	2d
0.475719	0.0403361	0.355742	0.336163	0.165855	3.03423	8.32042	2d
0.181642	0.121008	0.344538	0.333381	0.0728322	6.34833	9.19998	2d
0.152279	0.132773	0.423711	0.33776	0.0769785	6.48794	9.4033	2d
0.0379217	0.282353	0.383836	0.151424	0.0823869	7.31636	8.42642	2d
0.258545	0.0504202	0.460372	0.470896	0.258158	4.29447	10.4539	2d
0.505284	0.117647	0.212061	0.271009	0.0576888	4.07797	6.48104	2d
0.171481	0.0571429	0.451722	0.55782	0.258698	4.31703	10.4742	2d
0.796966	0.00504202	1	1	0.594736	-1.37941	8.44622	Contralateral
0.889957	0.00336134	0.781018	0.915912	0.705426	-1.35149	8.27379	Contralateral
0.922252	0.00840336	0.755314	0.315649	0.325942	-0.412518	8.70541	Contralateral
0.869606	0	0.947355	0.764662	0.976744	-1.37959	8.45212	Contralateral
0.175178	0.10084	0.463256	0.338565	0.173067	5.70112	9.85168	2d
0.00572656	0.278992	0.526611	0.304164	0.0722913	6.62648	9.17142	2d
0.267998	0.0722689	0.467705	0.492224	0.191635	4.27105	10.4329	2d
0.233132	0.0571429	0.700857	0.607704	0.242473	3.97322	10.608	2d
0.129997	0.280672	0.305569	0.182877	0.0825672	7.52141	7.75757	2d
0.0481222	0.305882	0.389026	0.207716	0.0647197	7.2946	8.47168	2d
0.27272	0.107563	0.356896	0.282045	0.131963	5.60424	9.19927	2d
0.104168	0.206723	0.519855	0.324663	0.118262	6.54867	9.44164	2d
0.128955	0.208403	0.316032	0.332507	0.107986	6.87634	8.98403	2d
0.143749	0.280672	0.300132	0.217955	0.0533622	7.4785	7.7539	2d
0.26073	0.159664	0.391251	0.25415	0.0881558	6.20479	9.10478	2d
0.276224	0.0991597	0.325671	0.427389	0.164774	4.72292	9.76036	2d
0.300259	0.169748	0.263223	0.172859	0.0758969	6.48592	7.46476	2d
0.892492	0.00504202	0.81422	0.531551	0.528935	-1.13589	8.55549	Contralateral
0.774395	0.0369748	0.55075	0.329817	0.158644	0.679154	8.51732	Contralateral
0.908346	0.00672269	0.627616	0.714261	0.446367	-0.886306	8.23368	Contralateral
0.817766	0.00168067	0.905998	0.695456	0.92843	-1.36208	8.39362	Contralateral
0.724165	0.0352941	0.491514	0.396719	0.154858	0.826668	8.45338	Contralateral
0.55959	0.0369748	0.397018	0.309857	0.185866	2.40578	8.34624	Contralateral
0.85357	0.00504202	0.669468	0.589804	0.625203	-1.17623	8.33832	Contralateral
0.813906	0.0168067	0.578102	0.46442	0.27907	0.0857296	8.58362	Contralateral
0.575681	0.0957983	0.228209	0.217886	0.0740941	3.7184	6.22873	Contralateral
0.819512	0.0268908	0.442824	0.271374	0.177213	0.92165	8.41568	Contralateral
0.720003	0.00504202	0.734965	0.609095	0.614026	-1.22207	8.4212	Contralateral
0.416359	0.115966	0.285302	0.272081	0.0955471	4.15015	7.44604	2d
0.499611	0.0470588	0.536744	0.275508	0.135028	2.95042	9.3062	2d
0.282563	0.0487395	0.519443	0.477448	0.237606	4.16126	10.524	2d
0.448126	0.0537815	0.262976	0.395397	0.182621	3.10106	8.0871	2d
0.486414	0.0991597	0.280689	0.250068	0.101857	3.94217	7.10973	2d
0.379572	0.117647	0.311583	0.250821	0.0886966	5.14438	7.75639	2d
0.283525	0.0453782	0.472565	0.412233	0.228772	4.28321	10.3561	2d
0.21763	0.183193	0.287362	0.173915	0.0477736	7.12751	7.80126	2d
0.148591	0.184874	0.268496	0.224233	0.0641788	7.21299	7.92342	2d
0.557812	0.0319328	0.402537	0.33706	0.251307	2.10569	8.39071	2d
0.240251	0.0739496	0.682402	0.249301	0.148188	5.31422	10.0673	2d
0.181085	0.0739496	0.44233	0.5102	0.205877	4.3346	10.4736	2d
0.681259	0.0302521	0.453864	0.284371	0.159546	1.5708	8.29938	Contralateral
0.794948	0.00672269	0.7797	0.573037	0.41536	-0.892353	8.62501	Contralateral
0.727958	0.0117647	0.74378	0.586939	0.35082	-0.646219	8.68695	Contralateral
0.700286	0.0201681	0.77451	0.499468	0.212187	-0.211299	8.77154	Contralateral
0.503203	0.0369748	0.472318	0.290026	0.190373	2.9751	9.28047	Contralateral
0.645815	0.0285714	0.670127	0.566234	0.179196	0.0443583	8.76877	Contralateral
0.801911	0.00672269	0.794035	0.439801	0.404904	-0.705522	8.73085	Contralateral
0.860456	0.00336134	0.849234	0.547315	0.557959	-1.10357	8.62495	Contralateral
0.789655	0.00672269	0.725902	0.670784	0.434469	-0.829782	8.51692	Contralateral
0.791401	0.00336134	0.834652	0.58706	0.589328	-1.28471	8.60841	Contralateral
0.831647	0.00168067	0.798402	0.848097	0.736795	-1.43451	8.31834	Contralateral
0.786485	0.00336134	0.648707	0.81308	0.702362	-1.34467	8.21677	Contralateral
0.783825	0.00336134	0.865052	0.826366	0.605012	-1.44658	8.44606	Contralateral
0.849346	0.00672269	0.627039	0.525235	0.430503	-0.678534	8.46457	Contralateral
0.769744	0.00336134	0.801862	0.697144	0.600505	-1.30314	8.53821	Contralateral
0.655121	0.00504202	0.83185	0.738036	0.613665	-1.38731	8.47768	Contralateral
0.380658	0.0453782	0.627204	0.484958	0.191996	3.70633	10.2473	2d
0.270649	0.0436975	0.49481	0.552355	0.232738	4.22468	10.5512	2d
0.261289	0.0621849	0.591696	0.485034	0.174328	4.06651	10.5264	2d
0.392123	0.0504202	0.548772	0.458286	0.177033	3.65419	10.1446	2d
0.152501	0.152941	0.388449	0.259699	0.0973499	6.64579	9.24668	2d
0.374632	0.0521008	0.415802	0.430087	0.163512	3.7443	9.70792	2d
0.091994	0.184874	0.348904	0.300189	0.113214	6.86218	8.98664	2d
0.317137	0.0403361	0.534767	0.578091	0.226248	4.12092	10.4751	2d
0.189419	0.2	0.295518	0.185758	0.0560663	7.18313	7.78908	2d
0.288719	0.0453782	0.423216	0.420921	0.284118	4.28839	10.2582	2d
0.168326	0.0705882	0.526199	0.437551	0.235082	4.30884	10.5698	2d
0.721372	0.0521008	0.435162	0.385501	0.11664	1.07893	8.37756	Contralateral
0.858845	0.00168067	0.531307	0.903796	1	-1.39117	8.18773	Contralateral
0.837289	0.00672269	0.679354	0.625977	0.50658	-0.978908	8.41792	Contralateral
0.766383	0.00840336	0.558988	0.610729	0.525509	-0.807148	8.39176	Contralateral
0.830799	0.00672269	0.634371	0.722873	0.617271	-1.20863	8.17402	Contralateral
0.744396	0.0252101	0.578926	0.32325	0.235983	0.448136	8.61227	Contralateral
0.838585	0.00840336	0.489619	0.522316	0.513972	-0.417211	8.26609	Contralateral
0.824386	0.00672269	0.427171	0.777622	0.544258	-0.659683	8.10978	Contralateral
0.785096	0.00672269	0.536909	0.63395	0.604291	-1.01972	8.23948	Contralateral
0.74928	0.0151261	0.383259	0.769245	0.378042	-0.374183	8.16911	Contralateral
0.205709	0.0739496	0.493327	0.482434	0.197584	4.2984	10.5893	2d
0.489907	0.0369748	0.650437	0.364727	0.218496	3.27656	10.1435	2d
0.600815	0.0907563	0.242709	0.234631	0.0858122	3.64161	6.33514	2d
0.240724	0.0638655	0.593014	0.452183	0.221381	4.01182	10.6005	2d
0.37548	0.107563	0.230598	0.304658	0.0937444	4.49465	7.44028	2d
0.0551203	0.25042	0.351211	0.249384	0.103299	7.10988	8.76983	2d
0.242606	0.115966	0.403114	0.237383	0.162791	5.94455	9.25672	2d
0.377662	0.112605	0.272533	0.2187	0.0944655	5.18098	7.4588	2d
0.134957	0.272269	0.311172	0.196741	0.0749955	7.49024	7.75879	2d
0.331697	0.087395	0.384001	0.300683	0.138093	4.9899	9.13046	2d
0.456767	0.119328	0.185203	0.187407	0.0841897	4.88644	6.28421	2d
0.194903	0.280672	0.269649	0.184116	0.0416441	7.51245	7.46251	2d
0.235793	0.112605	0.417367	0.415235	0.145123	4.88169	9.8657	2d
0.269677	0.0571429	0.84116	0.377907	0.252569	3.80587	10.5141	2d
0.461157	0.112605	0.33045	0.306132	0.0840094	3.65235	7.7248	Contralateral
0.727074	0.00840336	0.712391	0.62847	0.517397	-0.993093	8.36906	Contralateral
0.519776	0.0453782	0.685286	0.426986	0.161709	3.22811	10.0594	Contralateral
0.336112	0.121008	0.312078	0.188372	0.0955471	5.75098	7.81962	8w
0.323678	0.176471	0.265859	0.239708	0.086353	6.01774	7.69306	8w
0.458765	0.0554622	0.250865	0.288362	0.114476	3.68951	7.28696	8w
0.487439	0.0941176	0.282584	0.159459	0.0836488	4.429	6.77363	8w
0.437913	0.10084	0.25968	0.309986	0.0843699	3.94986	7.30506	8w
0.395812	0.515966	0.129511	0.0547794	0.0155039	7.35252	5.8678	8w
0.361758	0.161345	0.179272	0.119425	0.0320894	6.07911	6.19187	8w
0.361101	0.426891	0.0855166	0.0242164	0.00991527	7.22979	5.86195	8w
0.407937	0.154622	0.204482	0.110691	0.0645394	5.84182	6.40917	8w
0.413366	0.0705882	0.327237	0.218206	0.11033	4.34235	7.83132	8w
0.434766	0.0957983	0.279865	0.194605	0.0807644	4.80857	7.04639	8w
0.540098	0.211765	0.0449003	0.15163	0.0347936	5.62175	5.3167	8w
0.340102	0.0689076	0.331603	0.249635	0.15558	5.09735	8.55863	8w
0.325951	0.337815	0.121272	0.0922669	0.0158644	7.16551	5.99127	8w
0.244226	0.29916	0.202587	0.0858746	0.0497566	7.37851	6.6406	8w
0.355811	0.336134	0.0831274	0.0861938	0.0216333	7.01515	5.8047	8w
0.508837	0.354622	0.0979568	0.0637104	0.0102758	6.78655	5.59824	8w
0.360753	0.136134	0.178283	0.232138	0.0771588	5.64398	6.62241	8w
0.100022	0.164706	0.336382	0.248655	0.0849108	6.89905	8.96291	8w
0.201893	0.231933	0.339842	0.155027	0.055165	7.14552	7.97882	8w
0.433265	0.218487	0.162135	0.158964	0.0380386	6.05431	5.72116	8w
0.222766	0.121008	0.450733	0.201932	0.0665224	6.40355	9.19586	8w
0.232011	0.255462	0.339842	0.177359	0.0320894	7.26219	7.83586	8w
0.393458	0.168067	0.0780194	0.201697	0.0667027	5.72419	5.76587	8w
0.235402	0.115966	0.454441	0.32743	0.10402	5.74687	9.71027	8w
0.369507	0.0521008	0.32287	0.284037	0.161168	4.95537	8.63916	8w
0.465349	0.139496	0.149283	0.246344	0.0569677	4.82321	5.91137	8w
0.223789	0.097479	0.366782	0.220653	0.120786	6.09699	9.07118	8w
0.0212917	0.285714	0.426677	0.14827	0.0769785	7.30627	8.43616	8w
0.32698	0.0991597	0.392981	0.216237	0.0641788	5.42992	8.49677	8w
0.431243	0.0907563	0.293211	0.162088	0.0629169	4.79995	7.03731	8w
0.195117	0.127731	0.407398	0.243524	0.101496	6.51272	9.29773	8w
0.266224	0.107563	0.325589	0.25361	0.127096	5.94258	8.91509	8w
0.264964	0.156303	0.225161	0.0770272	0.0322697	6.81854	7.01483	8w
0.24042	0.142857	0.459549	0.182482	0.0715702	6.4381	9.05256	8w
0.216798	0.265546	0.198138	0.118437	0.0490355	7.39696	6.82783	8w
0.197479	0.166387	0.390262	0.142987	0.0782405	6.81594	8.65218	8w
0.16971	0.416807	0.209095	0.0814585	0.0338922	7.52726	6.47576	8w
0.306619	0.238655	0.190394	0.129466	0.0549847	6.96021	6.58225	8w
0.384192	0.240336	0.12811	0.0570749	0.0205516	6.49598	5.716	8w
0.362324	0.255462	0.194019	0.144036	0.037678	6.37032	6.01714	8w
0.301166	0.139496	0.338029	0.204904	0.0827474	5.98486	8.14019	8w
0.458981	0.263866	0.0473719	0.124381	0.0286641	5.97362	5.40096	8w
0.479	0.0789916	0.429313	0.15204	0.0796827	3.72879	8.40868	8w
0.252104	0.191597	0.292223	0.197349	0.0735533	6.84897	7.80129	8w
0.297015	0.206723	0.266683	0.167652	0.0569677	6.63607	7.26241	8w
0.384991	0.147899	0.239661	0.134505	0.0665224	5.81214	6.68323	8w
0.182793	1	0.143763	0.000205223	0.000180278	7.5689	6.21867	8w
0.422084	0.112605	0.262152	0.171734	0.088336	4.94797	6.94383	8w
0.356617	0.122689	0.338276	0.193495	0.0926627	5.58241	7.85392	8w
0.381328	0.0957983	0.242874	0.234547	0.110871	5.07789	7.32802	8w
0.364612	0.171429	0.257291	0.132985	0.0699477	5.97792	6.89003	8w
0.530337	0.0537815	0.485665	0.2628	0.164774	2.93634	9.23135	8w
0.38258	0.54958	0.0961443	0.0643185	0.00937444	7.33071	5.83093	8w
0.35884	0.0621849	0.300379	0.298303	0.148368	4.88265	8.5245	8w
0.458022	0.0571429	0.47825	0.217141	0.118623	3.36599	8.94723	8w
0.502848	0.0739496	0.354918	0.246139	0.10402	3.4423	8.01705	8w
0.574278	0.0773109	0.298237	0.170799	0.105823	3.7848	6.45073	8w
0.459253	0.114286	0.182979	0.194187	0.100775	4.73117	6.18498	8w
0.372477	0.161345	0.252513	0.20726	0.0609338	5.7728	6.98673	8w
0.307589	0.289076	0.0865876	0.0844836	0.01298	7.01807	5.91678	8w
0.385817	0.379832	0.119954	0.0835791	0.0236164	7.17237	5.83174	8w
0.37817	0.556303	0.050173	0.0238439	0.0113575	7.32312	5.76021	8w
0.358858	0.144538	0.1478	0.239708	0.0836488	5.5927	6.40687	8w
0.495759	0.0621849	0.41539	0.462718	0.131963	2.6509	8.71512	8w
0.499805	0.0487395	0.421239	0.274087	0.159726	3.01868	8.78625	8w
0.464208	0.0655462	0.437551	0.255237	0.13611	3.14204	8.9589	8w
0.321232	0.406723	0.19476	0.129177	0.0281233	7.26469	6.00022	8w
0.837407	0.0117647	0.870077	0.452343	0.352443	-0.684581	8.76832	Contralateral
0.646623	0.127731	0.153897	0.215986	0.0578691	3.76622	5.9424	Contralateral
0.735757	0.0352941	0.309606	0.278602	0.183703	1.55752	8.17747	Contralateral
0.801863	0.00840336	0.773933	0.656274	0.461511	-1.03593	8.56296	Contralateral
0.777481	0.0302521	0.39883	0.371105	0.204255	0.821852	8.38299	Contralateral
1	0.00840336	0.555858	0.553244	0.392464	-0.47827	8.37813	Contralateral
0.611168	0.0957983	0.2652	0.247294	0.0886966	3.60397	6.35905	Contralateral
0.813952	0.0218487	0.452051	0.347641	0.212187	0.776551	8.42097	Contralateral
0.793836	0.00504202	0.643022	0.691466	0.672616	-1.32519	8.27544	Contralateral
0.692415	0.0689076	0.297331	0.384125	0.0910402	2.04097	7.88111	Contralateral
0.255186	0.159664	0.348492	0.206325	0.0780602	6.50177	8.2418	8w
0.432951	0.22521	0.0666502	0.19706	0.0347936	5.82378	5.45408	8w
0.513012	0.0857143	0.304745	0.260991	0.114296	3.33863	7.42904	8w
0.258777	0.121008	0.239578	0.268356	0.0731927	6.07253	7.96431	8w
0.300968	0.142857	0.311089	0.187726	0.0663422	6.23845	7.83251	8w
0.369871	0.137815	0.220053	0.146795	0.0580494	5.88265	6.70642	8w
0.114664	0.317647	0.104218	0.243288	0.0416441	7.42751	7.11826	8w
0.58882	0.0857143	0.296754	0.148354	0.0739138	3.86515	6.40585	8w
0.470673	0.0470588	0.438211	0.341651	0.187849	3.03303	9.27005	8w
0.619573	0.206723	0.0316362	0.122952	0.0209122	5.38263	5.37848	8w
0.781026	0.0739496	0.14055	0.290596	0.0731927	3.67106	5.96436	8w
0.449308	0.0470588	0.463915	0.3318	0.198846	3.04342	9.31914	8w
0.443945	0.109244	0.268001	0.298395	0.083108	3.93216	7.31735	8w
0.1705	0.287395	0.13536	0.226893	0.0459708	7.41071	7.08692	8w
0.395266	0.129412	0.229362	0.159945	0.0632774	5.75336	6.75412	8w
0.426556	0.0436975	0.407481	0.369721	0.245358	3.45899	9.39982	8w
0.491249	0.117647	0.265777	0.256271	0.0748152	4.07635	6.78811	8w
0.484827	0.107563	0.298566	0.184161	0.0787813	4.44888	6.83664	8w
0.595666	0.10084	0.254078	0.210012	0.0717505	3.6973	6.34257	8w
0.452305	0.159664	0.144752	0.0855021	0.0302866	5.77422	5.62562	8w
0.239503	0.152941	0.207036	0.169856	0.0686858	6.94774	7.35479	8w
0.436008	0.0705882	0.368759	0.22722	0.106184	3.95238	8.21432	8w
0.63964	0.107563	0.18026	0.228938	0.0560663	3.69743	5.97671	8w
0.292322	0.0756303	0.529247	0.262329	0.121507	5.48316	9.90331	8w
0.496111	0.393277	0.0546218	0.0344547	0.00829277	6.91521	5.62613	8w
0.421723	0.102521	0.22203	0.261873	0.0957274	4.31614	7.08615	8w
0.254451	0.196639	0.363981	0.174934	0.0405625	6.96405	8.08562	8w
0.533007	0.0705882	0.371808	0.35246	0.114116	2.68993	8.12626	8w
0.564749	0.097479	0.293294	0.176834	0.0695872	3.84267	6.38264	8w
0.326998	0.092437	0.367276	0.20821	0.102578	5.49415	8.5016	8w
0.493875	0.0773109	0.301203	0.318491	0.112493	3.2863	7.57578	8w
0.845675	0.0168067	0.572417	0.386755	0.273842	0.144049	8.5317	8w
0.8441	0.010084	0.538969	0.565329	0.464575	-0.616093	8.35143	8w
0.801421	0.010084	0.616329	0.584734	0.397332	-0.565265	8.4599	8w
0.757268	0.0201681	0.601499	0.489997	0.275104	0.0340363	8.64893	Contralateral
0.637148	0.0857143	0.306228	0.438007	0.0692266	2.24974	7.85502	Contralateral
0.792761	0.00504202	0.767177	0.716229	0.675861	-1.45443	8.44094	Contralateral
0.728433	0.0134454	0.534932	0.57214	0.330449	-0.178674	8.45674	Contralateral
0.661161	0.0168067	0.637996	0.903712	0.337119	-0.691274	8.36712	Contralateral
0.539138	0.0252101	0.514747	0.494831	0.301424	2.33052	9.31662	Contralateral
0.311707	0.30084	0.157028	0.157079	0.0310078	6.98956	6.21882	Contralateral
0.682394	0.0218487	0.456747	0.649289	0.24698	0.123379	8.42052	Contralateral
0.328935	0.416807	0.0555281	0.11963	0.01947	7.25448	5.84857	Contralateral
0.391705	0.159664	0.217911	0.24173	0.0820263	5.48361	6.71815	Contralateral
0.674234	0.0285714	0.356401	0.565307	0.218136	1.07197	8.31121	8w
0.677026	0.0436975	0.384989	0.297954	0.147287	1.63163	8.21997	8w
0.363142	0.0823529	0.289504	0.20514	0.119704	5.27009	7.5832	8w
0.628968	0.0521008	0.203081	0.3242	0.122409	3.26365	6.66241	8w
0.368355	0.0554622	0.415143	0.312874	0.204615	3.88209	9.34419	8w
0.198401	0.147899	0.315208	0.271921	0.0809447	6.49724	8.93549	8w
0.594075	0.0991597	0.20201	0.22421	0.0688661	3.71462	6.09098	8w
0.502534	0.179832	0.169797	0.168838	0.0403822	5.38898	5.61953	8w
0.580534	0.0302521	0.384413	0.422114	0.225708	1.74672	8.32996	8w
0.399668	0.280672	0.108585	0.091598	0.0261403	6.57519	5.67398	8w
0.378953	0.121008	0.139891	0.190934	0.0683252	5.61827	6.17955	8w
0.454194	0.0504202	0.30491	0.367289	0.199027	3.18915	8.14511	8w
0.409142	0.285714	0.110809	0.129177	0.0221741	6.61068	5.63673	8w
0.529842	0.0789916	0.230351	0.240043	0.111231	3.87696	6.56734	8w
0.460487	0.0689076	0.357555	0.323303	0.124752	3.23718	8.23594	8w
0.692161	0.0991597	0.189982	0.127352	0.0589508	3.76844	6.00801	8w
0.488509	0.184874	0.0991102	0.179411	0.0405625	5.6193	5.3971	8w
0.512526	0.105882	0.181743	0.247089	0.0789616	4.28427	6.15264	8w
0.430971	0.0605042	0.236118	0.358776	0.192176	3.19751	7.96349	8w
0.834339	0.0554622	0.373043	0.300721	0.105282	1.06513	8.33854	8w
0.520298	0.216807	0.00576701	0.134102	0.0245178	5.7296	5.31823	8w
0.439784	0.0386555	0.206624	0.423094	0.283937	3.05691	8.11046	8w
0.837027	0.0218487	0.312737	0.393778	0.254732	0.845065	8.26309	8w
0.59985	0.119328	0.221041	0.320141	0.0692266	3.44659	6.4786	8w
0.812711	0.0336134	0.312654	0.509706	0.20155	0.898058	8.27616	Contralateral
0.801232	0.0218487	0.378975	0.627991	0.296016	-0.0897522	8.18424	Contralateral
0.829415	0.0134454	0.580656	0.569061	0.447449	-0.577617	8.34927	Contralateral
0.77577	0.0352941	0.440929	0.409208	0.211646	0.767405	8.41119	Contralateral
0.784659	0.0252101	0.570358	0.46911	0.26609	0.0499947	8.56427	Contralateral
0.840158	0.00672269	0.643269	0.59061	0.578691	-1.1117	8.35244	Contralateral
0.635902	0.0789916	0.16609	0.48866	0.115558	2.35044	7.65543	Contralateral
0.675776	0.0386555	0.420498	0.427602	0.182621	1.12356	8.40084	Contralateral
0.654757	0.0302521	0.355742	0.255374	0.159005	1.9312	8.12833	8w
0.591105	0.0218487	0.613363	0.410857	0.234902	2.2566	9.49843	8w
0.445844	0.0218487	0.837617	0.670563	0.384893	-0.605804	8.9324	8w
0.880486	0.0117647	0.439282	0.41256	0.40941	0.0307339	8.27733	8w
0.710361	0.0184874	0.633712	0.384011	0.307193	0.121305	8.71855	8w
0.586216	0.0285714	0.384165	0.394204	0.2468	1.81344	8.36974	8w
0.497649	0.0336134	0.523974	0.263028	0.236524	2.93885	9.35798	8w
0.457794	0.0554622	0.457077	0.430406	0.129079	3.29651	9.5125	8w
0.322188	0.0941176	0.297084	0.257304	0.0914008	5.41228	8.25939	8w
0.534962	0.0352941	0.463503	0.397563	0.206598	2.44526	8.8818	8w
0.626241	0.0302521	0.410035	0.332325	0.166937	1.86961	8.29382	8w
0.756638	0.0151261	0.395699	0.462429	0.307914	0.767558	8.29663	8w
0.331083	0.104202	0.31941	0.240598	0.0950063	5.45816	8.14778	8w
0.545867	0.0369748	0.515406	0.258156	0.157202	2.96881	9.2156	8w
0.83487	0.00672269	0.800214	0.471132	0.562286	-1.01066	8.66161	8w
0.518267	0.139496	0.132477	0.201202	0.0414639	4.79257	5.70263	8w
0.330444	0.168067	0.253749	0.219483	0.0793222	6.01021	7.53564	8w
0.158103	0.453782	0.104301	0.131472	0.0232558	7.55108	6.36363	8w
0.56852	0.0403361	0.376092	0.358449	0.20155	2.11228	8.41054	8w
0.522374	0.0840336	0.194678	0.283231	0.111592	4.06677	6.38562	8w
0.378512	0.104202	0.327072	0.34644	0.0923021	4.83273	8.84588	8w
0.534087	0.10084	0.179684	0.190797	0.0715702	4.19667	5.94545	8w
0.504799	0.0689076	0.273604	0.302195	0.118082	3.39528	7.41042	8w
0.467813	0.359664	0.0252101	0.0726034	0.0178475	6.89909	5.59164	8w
0.514609	0.0773109	0.132724	0.328623	0.121868	4.26491	6.14362	8w
0.468667	0.110924	0.102735	0.151645	0.0742744	5.2005	5.75643	8w
0.316262	0.0722689	0.395123	0.482146	0.150532	4.48615	9.91086	8w
0.452817	0.186555	0.04696	0.155149	0.0326303	5.75982	5.41493	8w
0.500049	0.0857143	0.203658	0.268113	0.0886966	4.10615	6.37374	8w
0.460083	0.184874	0.0515736	0.142296	0.0472327	5.68758	5.40985	8w
0.22398	0.72605	0.0350964	0	0	7.47883	6.02615	8w
0.360913	0.218487	0.172104	0.18949	0.0515594	6.16368	6.14809	8w
0.480128	0.110924	0.110891	0.191831	0.0721111	5.01781	5.78219	8w
0.445898	0.0386555	0.450404	0.301496	0.191455	3.16758	9.2171	8w
0.309853	0.0941176	0.297743	0.418868	0.137011	4.77496	9.5267	8w
0.279364	0.2	0.267095	0.156228	0.0591311	6.82757	7.28039	8w
0.385047	0.203361	0.0667326	0.168025	0.0405625	5.91258	5.68185	8w
0.497314	0.0823529	0.147883	0.284804	0.0932035	4.36614	6.13094	8w
0.59212	0.0554622	0.297495	0.304726	0.144042	2.73158	7.62337	8w
0.342708	0.136134	0.200445	0.204228	0.0775194	5.71771	6.74812	8w
0.41877	0.115966	0.10496	0.173961	0.1042	5.42802	5.93806	8w
0.527162	0.0336134	0.319657	0.614841	0.266991	1.97666	8.50715	8w
0.392224	0.159664	0.216098	0.199165	0.0639986	5.69385	6.62086	8w
0.468508	0.109244	0.0999341	0.247781	0.0903191	4.60657	5.98764	8w
0.664192	0.0285714	0.318998	0.419408	0.230215	1.40561	8.26085	8w
0.49013	0.131092	0.0810677	0.27582	0.0650802	4.57969	5.94768	8w
0.398344	0.151261	0.135278	0.242832	0.0676041	5.49882	6.21724	8w
0.341873	0.104202	0.277888	0.29993	0.12331	5.07988	8.548	8w
0.462929	0.0655462	0.110315	0.322178	0.14296	4.32116	6.18682	8w
0.346483	0.137815	0.203164	0.235741	0.1042	5.55548	6.79217	8w
0.546065	0.0655462	0.327566	0.290178	0.144943	2.80708	7.81141	8w
0.275068	0.119328	0.249053	0.432922	0.0946458	4.78164	9.50142	8w
0.210588	0.522689	0.087741	0.0458028	0.00973499	7.47678	6.11939	8w
0.569984	0.0957983	0.185533	0.207428	0.0746349	3.85225	6.0492	8w
0.511004	0.109244	0.12811	0.264381	0.0894177	4.41679	6.06731	8w
0.531578	0.0403361	0.33597	0.345953	0.186227	2.61391	8.16278	8w
0.466053	0.107563	0.207365	0.265688	0.113034	4.04742	6.76355	8w
0.725802	0.0352941	0.48896	0.455854	0.170182	0.685504	8.56057	8w
0.670807	0.105882	0.0197726	0.239625	0.0652605	3.75872	5.91682	8w
0.478318	0.0504202	0.28316	0.291668	0.162791	3.31085	7.70695	8w
0.645486	0.0352941	0.3812	0.353205	0.1947	1.62032	8.28716	8w
0.517959	0.0571429	0.3232	0.280525	0.160267	2.99459	7.88314	8w
0.526732	0.0453782	0.52002	0.252577	0.201731	2.90892	9.29677	8w
0.534913	0.0857143	0.14953	0.279522	0.11069	4.31576	6.09806	8w
0.395472	0.22521	0.202422	0.271191	0.0402019	5.69299	6.3004	8w
0.568288	0.0588235	0.335311	0.267816	0.14909	2.7453	7.7606	8w
0.501957	0.0521008	0.461938	0.280814	0.140977	2.95148	9.15598	8w
0.482335	0.119328	0.158675	0.244634	0.102758	4.51104	6.10163	8w
0.350278	0.231933	0.103394	0.0555623	0.0347936	6.52294	5.82663	8w
0.562773	0.0504202	0.398665	0.24414	0.141157	2.83008	8.38138	8w
0.423107	0.121008	0.310348	0.228566	0.0969894	4.57626	7.6333	8w
0.248605	0.196639	0.278382	0.178871	0.0688661	6.91696	7.78248	8w
0.522935	0.0638655	0.40954	0.269048	0.124932	2.91791	8.54441	8w
0.469224	0.102521	0.235541	0.218662	0.0823869	4.21084	6.68462	8w
0.316676	0.376471	0.156533	0.0956645	0.0286641	7.26088	6.04213	8w
0.606381	0.0655462	0.26693	0.296814	0.134127	3.04225	7.08766	8w
0.434597	0.105882	0.265859	0.335981	0.0876149	3.86507	7.40573	8w
0.326574	0.435294	0.0610479	0.0851753	0.0245178	7.29058	5.84241	8w
0.381409	0.263866	0.176388	0.12397	0.0367766	6.4059	5.9521	8w
0.790842	0.0336134	0.311831	0.452282	0.1947	0.909162	8.27792	Contralateral
0.797003	0.0134454	0.748476	0.651865	0.392464	-0.881764	8.57385	Contralateral
0.713111	0.0352941	0.331603	0.493357	0.204976	0.955791	8.22433	Contralateral
0.876606	0.0151261	0.50931	0.727912	0.338742	-0.510138	8.09646	Contralateral
0.805279	0.0134454	0.529906	0.60477	0.307554	-0.282825	8.34778	Contralateral
0.685886	0.0201681	0.766106	0.490446	0.331531	-0.414234	8.79628	Contralateral
0.841335	0.0134454	0.471165	0.616438	0.369569	-0.251803	8.24329	Contralateral
0.292682	0.121008	0.393063	0.3638	0.111592	5.17154	9.58997	1w
0.327721	0.0991597	0.260339	0.42143	0.131783	4.74153	9.46398	1w
0.424244	0.0487395	0.469105	0.419575	0.202993	3.45025	9.69183	1w
0.278904	0.0705882	0.578926	0.467347	0.165315	4.04304	10.4554	1w
0.264067	0.105882	0.325342	0.329855	0.119704	5.45441	9.2096	1w
0.0991511	0.139496	0.566073	0.272362	0.0962683	6.45076	9.48012	1w
0.102759	0.215126	0.413742	0.186373	0.0726519	6.92576	8.98685	1w
0.137744	0.183193	0.423546	0.259007	0.106003	6.73049	9.27888	1w
0.19485	0.132773	0.504119	0.250638	0.107626	6.37125	9.51559	1w
0.182548	0.131092	0.469023	0.278313	0.105823	6.43248	9.51685	1w
0.0916836	0.544538	0.208107	0.0730063	0.0272219	7.62822	6.3515	1w
0.254296	0.112605	0.508815	0.292945	0.131963	5.59225	9.91536	1w
0.251131	0.0605042	0.478085	0.50792	0.222823	4.27435	10.5152	1w
0.243637	0.132773	0.347833	0.242696	0.111231	6.08663	8.97872	1w
0.319044	0.0672269	0.494563	0.424736	0.18208	4.19602	10.2689	1w
0.226892	0.0941176	0.384989	0.41544	0.139895	4.8291	9.84106	1w
0.334502	0.0386555	0.66403	0.351692	0.267893	3.64134	10.327	1w
0.23357	0.092437	0.32287	0.477501	0.147107	4.78338	9.8098	1w
0.177322	0.0554622	0.646812	0.448497	0.27294	4.03164	10.6332	1w
0.383399	0.235294	0.193442	0.166755	0.053903	6.20201	6.08321	1w
0.222465	0.0991597	0.510133	0.289654	0.140256	5.67527	9.88744	1w
0.309621	0.134454	0.300873	0.227015	0.0906796	5.89735	8.08328	1w
0.248218	0.0823529	0.326578	0.433173	0.153236	4.78409	9.79317	1w
0.306828	0.12437	0.268578	0.268098	0.109609	5.57199	8.23702	1w
0.65514	0.12605	0.191382	0.184693	0.0497566	3.72291	5.90359	1w
0.194355	0.12605	0.36258	0.283801	0.101677	6.45094	9.14077	1w
0.165214	0.191597	0.309524	0.164703	0.0537227	7.25015	7.94271	1w
0.294463	0.092437	0.282089	0.391794	0.151253	4.869	9.53927	1w
0.434482	0.240336	0.10496	0.127041	0.0290247	6.22635	5.56629	1w
0.311003	0.0806723	0.490278	0.279408	0.109429	5.39382	9.79228	1w
0.168168	0.243697	0.165184	0.180551	0.0639986	7.42282	7.17376	1w
0.528259	0.277311	0.026693	0.129177	0.0257797	5.79922	5.30378	1w
0.702798	0.107563	0.123744	0.250046	0.0614747	3.68631	5.97922	Contralateral
0.853185	0.0134454	0.659993	0.638138	0.384712	-0.744345	8.44947	Contralateral
0.775877	0.0252101	0.419262	0.451704	0.227871	0.731454	8.38265	Contralateral
0.945624	0.00840336	0.533613	0.456356	0.484586	-0.345685	8.30679	Contralateral
0.874687	0.0218487	0.482699	0.454554	0.239769	0.291376	8.38421	Contralateral
0.882061	0.0117647	0.488796	0.652679	0.412475	-0.503609	8.17397	Contralateral
0.670881	0.0235294	0.394793	0.443746	0.351001	1.04973	8.25456	8w
0.454405	0.105882	0.262646	0.308185	0.11069	3.81775	7.30732	8w
0.629929	0.14958	0.169056	0.205953	0.0522805	3.69458	5.83503	8w
0.250232	0.258824	0.132065	0.115526	0.0594916	7.16415	6.54706	8w
0.248975	0.240336	0.138161	0.204395	0.078601	7.34999	7.12499	8w
0.295276	0.164706	0.180096	0.209974	0.0822066	6.46033	7.14339	8w
0.433268	0.0941176	0.391827	0.216237	0.0686858	3.99152	8.33536	8w
0.603475	0.183193	0.0885648	0.165684	0.0466919	4.89581	5.47425	8w
0.273021	0.0857143	0.343796	0.406798	0.160267	4.86616	9.75853	8w
0.456935	0.317647	0.104795	0.0814965	0.0331711	6.67007	5.58546	8w
0.674095	0.114286	0.127945	0.273479	0.0612944	3.69752	5.97031	8w
0.54086	0.0554622	0.296424	0.382491	0.140256	2.61138	8.06975	8w
0.378503	0.156303	0.138079	0.171247	0.0778799	5.72688	6.11413	8w
0.315991	0.282353	0.173752	0.0857529	0.0391202	6.99588	6.25717	8w
0.467039	0.510924	0	0.0396613	0.00504777	7.24162	5.77415	8w
0.489984	0.12437	0.252101	0.261264	0.0703083	4.05394	6.82386	8w
0.570291	0.132773	0.236777	0.136474	0.0731927	3.99054	6.11696	8w
0.290537	0.245378	0.154474	0.106237	0.0492158	7.04109	6.38957	8w
0.391544	0.107563	0.274015	0.16994	0.0982513	5.25529	7.14737	8w
0.284175	0.144538	0.293706	0.193138	0.100595	6.41468	7.80346	8w
0.574662	0.146218	0.151096	0.154792	0.0530016	4.41263	5.65995	8w
0.45685	0.0588235	0.543665	0.335016	0.144402	3.07314	9.64159	8w
0.732287	0.0218487	0.276652	0.506218	0.337299	0.881627	8.11299	8w
0.734674	0.0252101	0.373702	0.403097	0.242293	0.870035	8.27971	8w
0.760072	0.0235294	0.57596	0.497819	0.283937	-0.0541883	8.61936	8w
0.500773	0.178151	0.137749	0.111178	0.0580494	5.55969	5.53208	8w
0.911686	0.0117647	0.684544	0.681835	0.44186	-0.906015	8.36712	Contralateral
0.706035	0.0386555	0.585187	0.487375	0.18208	0.251361	8.7169	Contralateral
0.506088	0.0840336	0.354095	0.320133	0.122589	2.91735	8.00659	Contralateral
0.809257	0.0151261	0.529165	0.539775	0.366504	-0.278617	8.41156	Contralateral
0.794771	0.0134454	0.589389	0.652983	0.359113	-0.437428	8.25193	Contralateral
0.809625	0.0168067	0.396441	0.776459	0.382189	-0.501984	8.10981	Contralateral
0.31872	0.0890756	0.392074	0.275547	0.146385	5.12639	9.17922	1w
0.130092	0.171429	0.344373	0.274992	0.133045	6.83793	9.06002	1w
0.30297	0.0857143	0.344867	0.32838	0.170903	5.21961	9.34962	1w
0.289398	0.0890756	0.283737	0.263461	0.16207	5.29918	8.58793	1w
0.284219	0.109244	0.360685	0.315542	0.115558	5.55259	9.29009	1w
0.205022	0.282353	0.265695	0.149289	0.0394808	7.46773	7.35691	1w
0.15997	0.12437	0.423052	0.300888	0.144763	6.5133	9.48161	1w
0.282504	0.151261	0.240072	0.234631	0.0814855	6.3645	7.70741	1w
0.270837	0.097479	0.338276	0.208058	0.113395	6.00769	8.61396	1w
0.284186	0.29916	0.208931	0.103942	0.0483144	7.18962	6.47296	1w
0.328197	0.132773	0.253007	0.262245	0.105462	5.5764	8.01849	1w
0.279783	0.141176	0.2638	0.168808	0.0950063	6.52229	7.55127	1w
0.291028	0.0941176	0.409128	0.182687	0.103479	5.61161	8.63753	1w
0.272088	0.0504202	0.648377	0.424029	0.267893	3.90138	10.529	1w
0.396953	0.0403361	0.407316	0.322596	0.210023	3.50666	9.22184	1w
0.3618	0.0705882	0.393887	0.238538	0.106003	4.64103	8.67784	1w
0.420777	0.0470588	0.605372	0.345862	0.187128	3.3857	10.1287	1w
0.174349	0.319328	0.186604	0.0692439	0.0335316	7.4983	6.72348	1w
0.325711	0.0756303	0.469517	0.373385	0.185506	4.23338	10.0357	1w
0.357845	0.151261	0.296836	0.23156	0.0813052	5.48276	7.70822	1w
0.272421	0.0453782	0.600593	0.632453	0.288624	4.04126	10.6426	1w
0.355045	0.110924	0.396523	0.272696	0.0996935	4.72371	8.76945	1w
0.327045	0.0672269	0.580985	0.306824	0.191455	3.80066	10.1611	1w
0.199332	0.194958	0.395288	0.212026	0.0847305	6.69602	9.00477	1w
0.300557	0.189916	0.21857	0.163951	0.060393	6.6589	7.14217	1w
0.303445	0.218487	0.22722	0.144994	0.0589508	6.78544	6.95013	1w
0.276362	0.151261	0.316691	0.21097	0.0906796	6.32846	8.13077	1w
0.283348	0.0957983	0.380129	0.296289	0.159365	5.39002	9.29977	1w
0.225985	0.228571	0.219476	0.242392	0.0739138	7.14427	7.42158	1w
0.222375	0.184874	0.298319	0.138647	0.0569677	7.09075	7.71349	1w
0.223601	0.0672269	0.53798	0.299983	0.257617	5.30625	10.0752	1w
0.182939	0.164706	0.41885	0.275037	0.111952	6.563	9.43787	1w
0.668589	0.0352941	0.256632	0.346197	0.284658	1.60557	8.15605	1w
0.307178	0.131092	0.297413	0.23492	0.114837	5.80421	8.14385	1w
0.342857	0.25042	0.125721	0.164361	0.0374977	6.46508	6.02454	1w
0.344787	0.0554622	0.423628	0.429981	0.244997	4.05399	9.97419	1w
0.15806	0.302521	0.277064	0.180194	0.0670633	7.57632	7.55094	1w
0.229455	0.178151	0.323529	0.181904	0.0672436	7.03434	7.98899	1w
0.504387	0.0537815	0.455759	0.313764	0.178835	2.93679	9.20332	1w
0.502794	0.0689076	0.388697	0.17859	0.0776997	3.74891	8.17064	1w
0.184059	0.171429	0.419427	0.231682	0.121507	6.60776	9.31291	1w
0.271374	0.141176	0.336382	0.208993	0.0692266	6.34525	8.22631	1w
0.376316	0.258824	0.191135	0.061301	0.0268614	6.48368	5.85617	1w
0.402121	0.0739496	0.319163	0.394796	0.167658	3.40768	8.52723	1w
0.466139	0.0588235	0.466057	0.300804	0.163512	3.05347	9.20328	1w
0.285596	0.0722689	0.372384	0.51752	0.17541	4.58627	10.0948	1w
0.178986	0.205042	0.297084	0.234889	0.0758969	7.25108	7.98517	1w
0.423	0.0638655	0.358626	0.356754	0.184244	3.37219	8.56752	1w
0.424594	0.0554622	0.351293	0.333997	0.13665	3.38171	8.34185	1w
0.382717	0.0823529	0.370489	0.272734	0.151253	4.764	8.76776	1w
0.324563	0.17479	0.29387	0.225829	0.0769785	6.00695	7.7427	1w
0.267919	0.157983	0.353353	0.163799	0.0805841	6.59281	8.17199	1w
0.323163	0.0689076	0.352859	0.408668	0.198125	4.59053	9.75834	1w
0.384325	0.0890756	0.273439	0.187141	0.0852713	5.18263	7.21912	1w
0.353258	0.087395	0.282007	0.380218	0.148188	4.71876	9.41554	1w
0.461737	0.12605	0.248229	0.201917	0.0872544	4.42485	6.80064	1w
0.402207	0.163025	0.272862	0.170077	0.0757166	5.66015	6.92596	1w
0.482781	0.216807	0.0739001	0.131472	0.0329908	5.75532	5.34657	1w
0.517602	0.105882	0.264871	0.319822	0.0890571	3.49588	7.17941	Contralateral
0.481664	0.129412	0.122755	0.310967	0.0744547	4.46559	6.02921	Contralateral
0.314619	0.136134	0.297331	0.287449	0.0923021	5.55421	8.2901	Contralateral
0.440937	0.176471	0.176059	0.232716	0.0632774	5.31734	6.08711	Contralateral
0.81826	0.0151261	0.405668	0.629009	0.340184	-0.146202	8.24924	Contralateral
0.44925	0.216807	0.162465	0.182314	0.0513791	5.86874	5.7458	Contralateral
0.550653	0.0806723	0.316691	0.295423	0.11051	2.91985	7.65043	Contralateral
0.649277	0.0201681	0.374856	0.464823	0.301244	1.20962	8.30457	Contralateral
0.169097	0.257143	0.183391	0.228406	0.057148	7.46154	7.22884	1w
0.381652	0.129412	0.270143	0.25393	0.0840094	5.18946	7.58894	1w
0.293563	0.0705882	0.405915	0.283239	0.157382	5.31488	9.3043	1w
0.399225	0.0588235	0.451475	0.312867	0.12331	3.53167	9.18764	1w
0.460404	0.0638655	0.40402	0.270325	0.154137	3.16313	8.83685	1w
0.254254	0.216807	0.235706	0.115047	0.0393005	6.98708	7.08743	1w
0.188991	0.087395	0.532542	0.343521	0.189292	5.44272	9.98649	1w
0.492099	0.0739496	0.264788	0.281832	0.125834	3.51283	7.28565	1w
0.258381	0.0638655	0.442742	0.318035	0.187849	5.25936	9.81206	1w
0.000401118	0.636975	0.259351	0.0969718	0.0272219	7.63129	6.34957	1w
0.433937	0.0840336	0.266766	0.173186	0.0865333	4.78274	6.96633	1w
0.55841	0.0806723	0.264294	0.142828	0.0847305	3.90782	6.36515	1w
0.261028	0.0537815	0.504614	0.392303	0.232558	4.34979	10.2863	1w
0.20225	0.132773	0.298237	0.294404	0.141698	5.99563	9.02799	1w
0.372148	0.092437	0.230021	0.480534	0.166937	4.66185	9.47422	1w
0.469702	0.0605042	0.352529	0.4572	0.169641	2.67032	8.55281	1w
0.239375	0.110924	0.398583	0.264753	0.116279	6.06838	9.28289	1w
0.2633	0.10084	0.328308	0.332279	0.180638	5.34934	9.34866	1w
0.368155	0.0487395	0.537898	0.296791	0.183162	3.56466	10.0769	1w
0.103798	0.331092	0.26141	0.192925	0.0652605	7.59373	7.56928	1w
0.146275	0.413445	0.20926	0.135083	0.0457905	7.58963	6.56094	1w
0.424333	0.0756303	0.408881	0.258027	0.143681	3.5843	8.82154	1w
0.307972	0.364706	0.17507	0.127702	0.0349739	7.18628	6.14383	1w
0.278415	0.47395	0.153238	0.0688334	0.0221741	7.48912	5.9969	1w
0.450114	0.0941176	0.241885	0.243205	0.0904994	4.20013	7.05705	1w
0.236527	0.384874	0.171775	0.139787	0.0340725	7.4615	6.40976	1w
0.452355	0.110924	0.274592	0.263606	0.0881558	3.99486	7.26148	1w
0.42561	0.0453782	0.575136	0.482184	0.194159	3.45961	10.0361	1w
0	0.442017	0.393393	0.14488	0.0560663	7.42852	8.28745	1w
0.386945	0.0941176	0.271956	0.232176	0.108888	5.11253	7.5884	1w
0.220328	0.164706	0.244521	0.302568	0.0914008	6.33549	8.14264	1w
0.137606	0.161345	0.432444	0.218821	0.114837	6.70996	9.31189	1w
0.209295	0.27563	0.191959	0.176918	0.0566072	7.44756	7.12643	1w
0.31512	0.206723	0.228538	0.110091	0.0438075	6.76659	6.87982	1w
0.342702	0.393277	0.0925194	0.0655118	0.0164053	7.29023	5.80757	1w
0.346368	0.0907563	0.329132	0.351966	0.131963	4.86925	9.22796	1w
0.217468	0.0789916	0.407069	0.47307	0.213629	4.4242	10.4192	1w
0.317968	0.0739496	0.381447	0.293135	0.169461	5.16756	9.20843	1w
0.338746	0.152941	0.240402	0.161017	0.0872544	6.04146	7.09223	1w
0.362344	0.12437	0.287856	0.253322	0.073373	5.31846	7.699	1w
0.425542	0.0453782	0.52554	0.46512	0.237966	3.39826	9.90507	1w
0.331267	0.166387	0.245345	0.18141	0.0578691	6.13597	7.19307	1w
0.139938	0.529412	0.223842	0.0986136	0.0127997	7.72959	6.29424	1w
0.36214	0.12437	0.259351	0.182558	0.0795024	5.67156	7.16979	1w
0.398208	0.164706	0.158016	0.151751	0.0585902	5.91101	6.04162	1w
0.458407	0.0739496	0.354424	0.257198	0.137732	3.58411	8.14219	1w
0.252192	0.220168	0.238507	0.15204	0.0679647	7.15876	7.2922	1w
0.476657	0.0957983	0.309112	0.159656	0.0951866	4.4605	6.88749	1w
0.440892	0.0621849	0.409952	0.183789	0.133766	3.80324	8.45458	1w
0.357126	0.097479	0.39364	0.209366	0.120966	4.61627	8.66774	1w
0.466597	0.0504202	0.495716	0.34045	0.203173	3.07018	9.42564	1w
0.338825	0.0672269	0.443483	0.25298	0.163151	4.46495	9.18596	1w
0.349091	0.139496	0.268331	0.176864	0.0881558	5.88275	7.28595	1w
0.404735	0.0554622	0.451228	0.431372	0.191275	3.59977	9.68978	1w
0.404543	0.114286	0.2493	0.219072	0.091581	5.11357	7.13669	1w
0.201018	0.321008	0.212226	0.0653522	0.0277628	7.44816	6.73313	1w
0.335376	0.151261	0.275169	0.186981	0.0699477	6.04941	7.40889	1w
0.203942	0.739496	0.104218	0.0562084	0.0133405	7.54861	6.1597	1w
0.894468	0.0134454	0.37329	0.476483	0.392825	0.103898	8.26315	Contralateral
0.883192	0.00504202	0.666996	0.594433	0.674238	-1.24517	8.32394	Contralateral
0.861678	0.010084	0.451392	0.733012	0.439877	-0.547501	8.08658	Contralateral
0.940498	0.00672269	0.705635	0.601259	0.518478	-0.990438	8.41841	Contralateral
0.828892	0.0151261	0.642033	0.534386	0.314404	-0.29501	8.50252	Contralateral
0.863258	0.010084	0.589636	0.689634	0.458085	-0.733484	8.16708	Contralateral
0.990141	0.0184874	0.447438	0.513271	0.262304	0.0962412	8.29631	Contralateral
0.93775	0.00840336	0.538969	0.809066	0.477736	-0.789429	8.10883	Contralateral
0.937803	0.00840336	0.526693	0.537062	0.486569	-0.600938	8.18703	Contralateral
0.889929	0.00840336	0.532295	0.773038	0.521363	-0.693097	8.09753	Contralateral
0.46186	0.0537815	0.480886	0.335616	0.146926	3.02356	9.28085	1w
0.36333	0.0756303	0.396853	0.32125	0.144943	4.62832	9.03392	1w
0.436308	0.102521	0.335311	0.243684	0.0924824	4.08277	7.91834	1w
0.228618	0.191597	0.260999	0.144538	0.0585902	7.10346	7.47939	1w
0.452168	0.0605042	0.357143	0.487983	0.147467	2.71579	8.63058	1w
0.234029	0.114286	0.379058	0.289418	0.108347	5.92274	9.28334	1w
0.427516	0.0487395	0.446861	0.239929	0.176312	3.36025	9.05776	1w
0.457818	0.0907563	0.267425	0.256263	0.123851	3.96492	7.26783	1w
0.489623	0.107563	0.230763	0.237246	0.0677844	4.13243	6.61637	1w
0.451609	0.0504202	0.405339	0.241183	0.199928	3.25245	8.79554	1w
0.388039	0.0789916	0.280524	0.253147	0.174689	4.84551	8.38278	1w
0.270593	0.0672269	0.536579	0.280388	0.176852	5.34578	10.0989	1w
0.485095	0.12605	0.120942	0.172137	0.0522805	5.16531	5.74349	1w
0.412351	0.0470588	0.429972	0.434283	0.187849	3.53797	9.59488	1w
0.360305	0.0470588	0.472318	0.240119	0.186227	3.88393	9.27829	1w
0.501005	0.0823529	0.243697	0.212756	0.0706688	4.20965	6.57232	1w
0.383472	0.092437	0.412836	0.225571	0.0996935	4.41058	8.69714	1w
0.394101	0.139496	0.236612	0.157201	0.0683252	5.77114	6.73581	1w
0.419841	0.208403	0.137584	0.150733	0.040923	6.00661	5.72414	1w
0.366595	0.191597	0.194843	0.188661	0.0594916	5.99554	6.36254	1w
0.283479	0.132773	0.361097	0.250524	0.106003	5.93039	8.83672	1w
0.345684	0.137815	0.311748	0.118285	0.0465116	5.76823	7.2448	1w
0.500017	0.0672269	0.324683	0.409611	0.134127	2.76631	8.2689	1w
0.2925	0.10084	0.446861	0.295218	0.0778799	5.50305	9.60384	1w
0.351647	0.0521008	0.579667	0.3197	0.190193	3.58496	10.146	1w
0.259423	0.0689076	0.443813	0.316652	0.155039	5.34092	9.78635	1w
0.423635	0.208403	0.167491	0.114963	0.0371372	6.124	5.77102	1w
0.381314	0.102521	0.430137	0.216237	0.112493	4.40393	8.66357	1w
0.389443	0.213445	0.186604	0.116438	0.0301064	6.32713	5.91167	1w
0.22603	0.331092	0.149448	0.169895	0.0623761	7.44494	6.72454	1w
0.430734	0.0689076	0.288268	0.299193	0.157923	3.55079	7.83615	1w
0.396667	0.0621849	0.374114	0.426454	0.188931	3.70604	9.60416	1w
0.457053	0.0756303	0.451804	0.182124	0.126555	3.56634	8.72978	1w
0.460277	0.092437	0.340254	0.261873	0.106724	3.78244	7.91032	1w
0.181388	0.307563	0.234635	0.122169	0.0620155	7.57806	6.93009	1w
0.447402	0.0672269	0.290081	0.34102	0.196503	3.2649	8.01755	1w
0.411007	0.0369748	0.649942	0.323424	0.24013	3.42046	10.2549	1w
0.52719	0.127731	0.22722	0.153515	0.0466919	4.17552	6.0853	1w
0.345453	0.147899	0.231092	0.144789	0.0935641	5.97012	6.96119	1w
0.116262	0.252101	0.24172	0.203376	0.114837	7.54491	7.60841	1w
0.437974	0.142857	0.323447	0.150444	0.0629169	4.80289	7.01335	1w
0.247625	0.176471	0.239825	0.212672	0.102398	6.77579	7.60805	1w
0.259299	0.152941	0.283572	0.218905	0.0899585	6.50468	7.88992	1w
0.393742	0.231933	0.144258	0.095254	0.0447089	6.38481	5.77	1w
0.506318	0.0722689	0.328555	0.185674	0.109429	4.1322	6.98673	1w
0.535847	0.0470588	0.411765	0.400596	0.157563	2.34442	8.51805	1w
0.484087	0.114286	0.314467	0.198094	0.0694069	4.39977	6.92572	1w
0.49611	0.0470588	0.392898	0.271921	0.173067	2.92817	8.6449	1w
0.502134	0.0504202	0.336052	0.267011	0.209483	2.95559	7.96139	1w
0.420203	0.110924	0.348163	0.128075	0.0849108	4.75643	7.12945	1w
0.534758	0.0386555	0.320234	0.419735	0.260681	2.00018	8.27068	1w
0.42056	0.0302521	0.646647	0.410067	0.345051	3.44605	10.2399	1w
0.545486	0.0739496	0.235871	0.270986	0.131783	3.58406	6.70257	1w
0.579083	0.0470588	0.293623	0.259045	0.200829	2.75464	7.6575	1w
0.612869	0.0268908	0.38054	0.411754	0.26591	1.70495	8.3075	1w
0.373222	0.0840336	0.442742	0.230869	0.0986119	4.40176	8.78087	1w
0.587772	0.0319328	0.245428	0.427267	0.284298	1.73086	8.16214	1w
0.568143	0.0554622	0.236448	0.220957	0.120606	3.7131	6.2886	1w
0.317359	0.117647	0.307547	0.197402	0.105102	5.81803	7.97211	1w
0.521562	0.226891	0.139315	0.138275	0.0319091	5.60986	5.39909	1w
0.541487	0.0739496	0.17886	0.418184	0.145484	2.78601	7.47376	1w
0.82184	0.00504202	0.564755	0.651858	0.749414	-1.3274	8.20263	Contralateral
0.717479	0.0117647	0.522409	0.609886	0.440959	-0.442532	8.37868	Contralateral
0.86953	0.00672269	0.712885	0.835054	0.574545	-1.34433	8.21643	Contralateral
0.720118	0.00840336	0.6913	0.61171	0.51938	-0.864182	8.55509	Contralateral
0.758894	0.00336134	0.672351	0.722956	0.816477	-1.42569	8.23158	Contralateral
0.660408	0.0117647	0.492997	0.546844	0.438255	-0.358061	8.35887	Contralateral
0.537649	0.0773109	0.356401	0.336452	0.0903191	2.68281	7.95211	Contralateral
0.617287	0.0336134	0.336876	0.445669	0.209663	1.54789	8.25796	Contralateral
0.288382	0.156303	0.207777	0.182368	0.107626	6.53126	7.30407	1w
0.470295	0.0336134	0.342396	0.44478	0.290608	2.32688	8.39404	1w
0.322001	0.0941176	0.266271	0.294564	0.144402	5.236	8.56952	1w
0.405176	0.0453782	0.586835	0.277926	0.205516	3.37572	10.0978	1w
0.326803	0.0890756	0.307794	0.257289	0.134127	5.29347	8.45821	1w
0.347108	0.122689	0.322294	0.210141	0.096088	5.56602	7.88807	1w
0.364977	0.109244	0.191382	0.229675	0.118082	5.42992	6.9071	1w
0.241699	0.398319	0.20926	0.127216	0.034433	7.45961	6.462	1w
0.459365	0.151261	0.262317	0.123157	0.0654408	4.96499	6.64649	1w
0.257065	0.184874	0.236777	0.304073	0.085091	6.21008	8.05975	1w
0.35617	0.131092	0.322211	0.171217	0.0553452	5.78029	7.49786	1w
0.221289	0.181513	0.264212	0.201902	0.0856319	6.9827	7.70901	1w
0.210549	0.208403	0.206953	0.159497	0.0560663	7.25553	7.19793	1w
0.45227	0.166387	0.2348	0.122343	0.0383991	5.62564	6.28964	1w
0.276907	0.168067	0.282913	0.184807	0.0978908	6.55202	7.67197	1w
0.562196	0.0537815	0.387626	0.349533	0.159365	2.32438	8.33379	1w
0.442956	0.206723	0.154721	0.11418	0.03245	6.04546	5.69498	1w
0.357701	0.0907563	0.316444	0.309978	0.154858	4.93236	8.73147	1w
0.469775	0.105882	0.273274	0.169248	0.0427258	4.61648	6.81273	1w
0.530135	0.0588235	0.340995	0.30899	0.106724	2.76256	7.86923	1w
0.47969	0.0672269	0.253666	0.322391	0.165134	3.29604	7.7362	1w
0.54813	0.183193	0.208766	0.154503	0.0430864	4.47963	5.76305	1w
0.476276	0.0655462	0.286373	0.352368	0.199928	3.07286	8.04728	1w
0.611177	0.0672269	0.219311	0.459115	0.159906	2.27705	7.80572	1w
0.522176	0.104202	0.275087	0.187931	0.0807644	4.18735	6.66508	1w
0.52716	0.0420168	0.28695	0.254294	0.235983	2.88573	7.71792	1w
0.407963	0.0907563	0.204647	0.308587	0.127456	4.20064	7.2891	1w
0.405411	0.121008	0.230186	0.224727	0.0841897	5.11918	7.07586	1w
0.448325	0.0554622	0.434586	0.266501	0.170362	3.3112	9.04392	1w
0.267831	0.087395	0.378316	0.33719	0.185686	5.31125	9.516	1w
0.368232	0.109244	0.338936	0.269169	0.114476	4.98238	8.54231	1w
0.352537	0.157983	0.181826	0.178582	0.0526411	5.90337	6.48863	1w
0.278585	0.12437	0.260092	0.333419	0.124932	5.35162	8.74914	1w
0.209004	0.105882	0.301203	0.300432	0.171444	5.81391	9.06901	1w
0.235811	0.216807	0.35912	0.189938	0.0771588	6.96789	8.1474	1w
0.22614	0.230252	0.213874	0.182368	0.0553452	7.21838	7.26669	1w
0.426461	0.0403361	0.468611	0.408311	0.22733	3.45118	9.68019	1w
0.369093	0.119328	0.367112	0.334271	0.098071	4.7849	8.93759	1w
0.429456	0.102521	0.398665	0.245204	0.0894177	4.03531	8.43336	1w
0.503379	0.0722689	0.380952	0.288096	0.14945	2.98568	8.43964	1w
0.242146	0.258824	0.185286	0.0687802	0.0412836	7.31664	6.60833	1w
0.161709	0.186555	0.348739	0.295066	0.0836488	6.75262	8.9975	1w
0.315585	0.0806723	0.417202	0.371401	0.17559	4.56267	9.85044	1w
0.199519	0.159664	0.421239	0.196703	0.101496	6.60793	9.19142	1w
0.362014	0.215126	0.18611	0.137781	0.0342527	6.28608	6.11978	1w
0.344594	0.0957983	0.209013	0.41785	0.12349	4.69961	9.42947	1w
0.24848	0.102521	0.280194	0.38864	0.149991	4.9279	9.54782	1w

## Sheet: Supplementary Fig. 1
	Supplementary Fig. 1b (% of Confetti+ Ly6clo monocytes)											Supplementary Fig. 1c (Infarct volume [mm3])
	CFP		GFP		YFP		RFP
	-5w	-1w	-5w	-1w	-5w	-1w	-5w	-1w				4.66
	0	0	0.11	0	0.15	0.028	0.094	0.028				12.18
	0.038	0.00951	0.21	0	0.11	0	0.17	0.038				47.6
	0.035	0.019	0	0	0.21	0	0.07	0				73.09
	0.00819	0.045	0.074	0.015	0.49	0	0.51	0.015				5.1
	0.022	0	0.011	0	0.054	0	0.065	0				10.93
	0.011	0	0.094	0	0.083	0	0.16	0				14.43
	0.00532	0.06	0.027	0	0.058	0	0.18	0				12.98
	0.7	0.082	1.84	0	1.59	0	2.29	0				9.14
	0.61	0.2	0.61	0	1.39	0	1.57	0.022				34.7
	0.6	0.018	0.88	0	1.13	0.018	1.27	0				4.58
	0.34	0.089	0.26	0	0.98	0.022	1.07	0				7.68
	0.29	0.025	0.19	0	0.81	0	0.78	0.025				6.9
	0.77	0.27	0.79	0	2.69	0	2.5	0				24.35
	0.12	0.12	0.046	0	0.39	0	0.71	0				9.44
	0.11	0.12	0.096	0	0.43	0	0.4	0				10.5
	0.24	0.045	0	0	0.48	0.015	1.19	0				7.33
	0.63	0.084	0.45	0	0.48	0	0.7	0				10.26
	0.26	0.088	0.15	0	0.68	0	0.88	0				9.85
	0.5	0.088	0.82	0	0.94	0	1.06	0.18				41.95
	0.065	0.11	0.018	0	0.18	0	0.3	0				8.97
	0.22	0.035	0.24	0	0.36	0	0.44	0				6.83
												9.78
												10.56
												10.7
												23.61
												13.87
												5.29
												8.38
												8.16
												7.01
												13.97
												10.8

## Sheet: Supplementary Fig. 2
			Clone size frequency (%) - Contralateral
	Time point	Animal	1 cell	2 cells	3 cells	4 cells	5 cells	6 cells	7 cells	8 cells	9 cells	10 cells	11 cells	12 cells	13 cells	14 cells	15 cells
	2d	1	0.908163	0.0867347	0.00510204
		2	0.902778	0.0972222
		3	0.913043	0.0750988	0.00790514	0.00395257
		4	0.884191	0.101103	0.0128676	0.00183824
		5	0.907173	0.0801688	0.00421941	0.00843882
		6	0.90458	0.0877863	0.00381679	0.00381679
		7	0.753769	0.18593	0.0502513	0.0100503
		8	0.859331	0.119777	0.0194986	0.00139276
	1w	1	0.947368	0.0473684	0.00526316
		2	0.919708	0.0729927	0.00729927
		3	0.967742	0.0230415	0.00921659
		4	0.923077	0.0564103	0.0205128
		5	0.903654	0.0863787	0.00996678
		6	0.939024	0.0569106	0	0.00406504
		7	0.924699	0.0692771	0.00301205	0.00301205
		8	0.91453	0.0726496	0.00854701	0.00213675	0.00213675
	2w	1	0.939535	0.055814	0.00465116
		2	0.930636	0.066474	0.00289017
		3	0.902116	0.0846561	0.010582	0.0026455
		4	0.953125	0.0375	0.00625	0.003125
		5	0.934169	0.0595611	0.00626959
		6	0.922819	0.0771812
		7	0.917808	0.0821918
	4w	1	0.848131	0.119159	0.0186916	0.0116822	0.00233645
		2	0.926702	0.0628272	0.0104712
		3	0.902985	0.0970149
		4	0.926901	0.0701754	0.00292398
		5	0.922652	0.0718232	0.00276243	0.00276243
		6	0.954386	0.045614
		7	0.931373	0.0686275
	8w	1	0.933121	0.0477707	0.0191083
		2	0.989583	0.0104167
		3	0.950311	0.0496894
		4	0.929825	0.0657895	0.00438596
		5	0.934673	0.0653266
		6	0.908127	0.0812721	0.00706714	0.00353357
		7	0.908434	0.0771084	0.0120482	0.00240964
	12w	1	0.952381	0.047619
		2	0.971429	0.0285714
		3	0.914209	0.080429	0.00536193
		4	0.912017	0.0772532	0.00858369	0.00214592
		5	0.923954	0.0760456
		6	0.922222	0.0740741	0.0037037

## Sheet: Supplementary Fig. 3
			Clone size frequency (%) - Stroke
	Time point	Animal	1 cell	2 cells	3 cells	4 cells	5 cells	6 cells	7 cells	8 cells	9 cells	10 cells	11 cells	12 cells	13 cells	14 cells	15 cells
	2d	1	0.787671	0.14726	0.0445205	0.0171233	0.00342466
		2	0.811024	0.154856	0.0288714	0.00262467	0.00262467
		3	0.815054	0.156989	0.0236559	0.00430108
		4	0.682256	0.222834	0.0577717	0.0206327	0.00687758	0.00825309	0	0.00137552
		5	0.819672	0.142077	0.0291439	0.00546448	0.00364299
		6	0.873913	0.102174	0.0152174	0.00652174	0.00217391
		7	0.746269	0.191045	0.0477612	0.0119403	0.00298507
		8	0.776089	0.16616	0.0435664	0.0070922	0.00405268	0.00202634	0.00101317
	1w	1	0.619231	0.221154	0.0903846	0.0365385	0.0134615	0.00769231	0.00576923	0	0.00384615	0	0	0.00192308
		2	0.475573	0.220339	0.107677	0.0707876	0.0358923	0.0229312	0.0189432	0.0129611	0.00498504	0.0109671	0.00498504	0.00498504	0.000997009	0.00398804	0.000997009
		3	0.644737	0.20614	0.0811404	0.0328947	0.0131579	0.00657895	0.00438596	0.00438596	0	0	0.00438596	0	0	0	0
		4	0.511526	0.231614	0.135016	0.0482986	0.0285401	0.0164654	0.00878156	0.00658617	0.00548847	0.00548847	0	0.00109769	0	0	0
		5	0.473438	0.203125	0.0945312	0.0695313	0.0375	0.028125	0.0210938	0.015625	0.0117188	0.009375	0.00703125	0.0101563	0.00546875	0.00078125	0.0015625
		6	0.448954	0.207872	0.127921	0.0762608	0.0430504	0.0233702	0.0246002	0.0110701	0.0147601	0.00492005	0.00369004	0.00246002	0.00246002	0.00246002	0
		7	0.412811	0.174377	0.104982	0.0880783	0.0551601	0.0320285	0.0293594	0.0160142	0.0106762	0.0133452	0.0106762	0.00800712	0.00978648	0.00355872	0.00533808
		8	0.467221	0.215143	0.106187	0.0554017	0.0424746	0.023084	0.0277008	0.0184672	0.00738689	0.0120037	0.00461681	0.00369344	0.00184672	0.00184672	0.00277008
	2w	1	0.470899	0.187831	0.104497	0.0568783	0.0674603	0.0291005	0.026455	0.010582	0.00793651	0.00529101	0.00529101	0.00793651	0.00793651	0	0
		2	0.474576	0.191149	0.121469	0.0536723	0.0517891	0.0291902	0.0178908	0.0141243	0.00753296	0.00847458	0.0094162	0.0047081	0.00564972	0.00094162	0
		3	0.608035	0.187839	0.0662324	0.0466884	0.0228013	0.0119435	0.0173724	0.00651466	0.00434311	0.00868621	0.00434311	0.00868621	0.00108578	0.00108578	0
		4	0.53923	0.178317	0.0841655	0.0513552	0.0570613	0.0185449	0.0142653	0.0171184	0.0042796	0.00713267	0.00285307	0.00713267	0.00285307	0.0042796	0.0042796
		5	0.411439	0.259225	0.121771	0.0627306	0.0369004	0.0258303	0.0202952	0.0156827	0.0129151	0.00184502	0.00922509	0.00738007	0.00184502	0.00276753	0.000922509
		6	0.446591	0.193182	0.0988636	0.0636364	0.0431818	0.0397727	0.0318182	0.00795455	0.00795455	0.0113636	0.0125	0.00681818	0.00681818	0.00568182	0.00113636
		7	0.428983	0.207294	0.12476	0.047025	0.0345489	0.0230326	0.0191939	0.0259117	0.00671785	0.012476	0.00959693	0.00287908	0.00671785	0.00863724	0.00479846
	4w	1	0.627273	0.201299	0.0649351	0.0285714	0.0311688	0.0103896	0.0038961	0.0038961	0.00779221	0.0038961	0.0012987	0.0012987	0.0038961	0.0012987	0.0025974
		2	0.493204	0.215534	0.0912621	0.0757282	0.0407767	0.0194175	0.0174757	0.0135922	0.0038835	0.00194175	0.00582524	0.0038835	0	0.00582524	0.00194175
		3	0.504762	0.2	0.0952381	0.0587302	0.0238095	0.0269841	0.0142857	0.0206349	0.00634921	0.00793651	0.0047619	0.0015873	0.00952381	0.0015873	0.0031746
		4	0.529828	0.177958	0.0758342	0.0475228	0.0485339	0.0273003	0.0131446	0.0182002	0.0091001	0.00808898	0.00606673	0.00808898	0.00505561	0.00505561	0.00606673
		5	0.654306	0.155502	0.0657895	0.0370813	0.0167464	0.0191388	0.0119617	0.00837321	0.00358852	0.00358852	0.00239234	0.00478469	0.00358852	0	0.00119617
		6	0.467875	0.158155	0.0823723	0.0477759	0.0494234	0.0313015	0.0230643	0.0214168	0.0214168	0.014827	0.00494234	0.0115321	0.0115321	0.00164745	0.00658979
		7	0.642565	0.155525	0.0736698	0.0368349	0.0177353	0.0163711	0.0136426	0.00545703	0.0095498	0.0122783	0	0.00682128	0.00136426	0.00272851	0.00272851
	8w	1	0.715818	0.147453	0.0643432	0.0348525	0.0134048	0.00268097	0.0080429	0.00268097	0.00536193	0.00268097	0.00268097
		2	0.632159	0.14978	0.0770925	0.0660793	0.0176211	0.0176211	0.0154185	0.0110132	0.00440529	0.00220264	0.00660793
		3	0.561863	0.171761	0.0989811	0.0596798	0.0276565	0.0262009	0.014556	0.00436681	0.00436681	0.00873362	0.00582242	0.00436681	0	0.00291121	0.00291121
		4	0.696459	0.165261	0.0573356	0.0269815	0.0185497	0.00337268	0.00674536	0.0118044	0.00505902	0.00168634	0.00505902	0	0	0	0
		5	0.590361	0.137349	0.0650602	0.053012	0.0433735	0.0144578	0.0144578	0.0240964	0.0192771	0.00481928	0.00240964	0	0.00481928	0.00240964	0.00481928
		6	0.675676	0.195426	0.0582121	0.024948	0.018711	0.02079	0	0.004158	0	0	0	0	0	0	0
		7	0.725217	0.154783	0.0417391	0.0121739	0.00869565	0.013913	0.00521739	0.00869565	0.00869565	0.00521739	0.00173913	0.00173913	0.00173913	0	0.00347826
	12w	1	0.864865	0.0810811	0.0135135	0.027027	0.0135135
		2	0.862745	0.107843	0.0196078	0	0	0.00980392
		3	0.559211	0.176535	0.0866228	0.0526316	0.0296053	0.0164474	0.0131579	0.0109649	0.0120614	0.00877193	0.00219298	0	0.00438596	0.00328947	0.00219298
		4	0.768692	0.161215	0.046729	0.0163551	0.00233645	0	0.00233645	0.00233645
		5	0.752273	0.2	0.0295455	0.0136364	0.00227273	0	0.00227273
		6	0.661891	0.183381	0.0888252	0.0229226	0.0114613	0.00573066	0.00573066	0.00286533	0	0	0	0.00286533	0.00286533	0.00286533	0

## Sheet: Supplementary Fig. 4
X 1: Position X	Unit	Category	Collection	Y 1: Position Y	Unit	Category	Collection	Z 1: Position Z	Unit	Category	Collection	Ki-67	ID	Birth [s]	Death [s]	Surpass Object	Surpass Object Data ID	Original ID	Original Component Name	Original Component ID	Original Image Name	Original Image ID
315	µm	Surface	Position	265	µm	Surface	Position	10400	µm	Surface	Position	0	0	0	1	CFP	700001	0	CFP	700001	20241103_KGE-4460_L6_2d_a_Series001.ims	S:\AG\AG-Endres\Daten\Gertz-Kronenberg\von Majed\IMARIS\Microfetti\Ki-67 quantification\Data\2d\KGE4460\20241103_KGE-4460_L6_2d_a_Series001.ims
190	µm	Surface	Position	267	µm	Surface	Position	10400	µm	Surface	Position	0	1	0	1	CFP	700001	1	CFP	700001	20241103_KGE-4460_L6_2d_a_Series001.ims	S:\AG\AG-Endres\Daten\Gertz-Kronenberg\von Majed\IMARIS\Microfetti\Ki-67 quantification\Data\2d\KGE4460\20241103_KGE-4460_L6_2d_a_Series001.ims
126	µm	Surface	Position	199	µm	Surface	Position	10400	µm	Surface	Position	0	2	0	1	CFP	700001	2	CFP	700001	20241103_KGE-4460_L6_2d_a_Series001.ims	S:\AG\AG-Endres\Daten\Gertz-Kronenberg\von Majed\IMARIS\Microfetti\Ki-67 quantification\Data\2d\KGE4460\20241103_KGE-4460_L6_2d_a_Series001.ims
249	µm	Surface	Position	340	µm	Surface	Position	10400	µm	Surface	Position	0	3	0	1	CFP	700001	0	CFP	700004	20241103_KGE-4460_L6_2d_c_Series005.ims	S:\AG\AG-Endres\Daten\Gertz-Kronenberg\von Majed\IMARIS\Microfetti\Ki-67 quantification\Data\2d\KGE4460\20241103_KGE-4460_L6_2d_c_Series005.ims
301	µm	Surface	Position	194	µm	Surface	Position	10400	µm	Surface	Position	0	4	0	1	CFP	700001	1	CFP	700004	20241103_KGE-4460_L6_2d_c_Series005.ims	S:\AG\AG-Endres\Daten\Gertz-Kronenberg\von Majed\IMARIS\Microfetti\Ki-67 quantification\Data\2d\KGE4460\20241103_KGE-4460_L6_2d_c_Series005.ims
277	µm	Surface	Position	232	µm	Surface	Position	10400	µm	Surface	Position	0	5	0	1	CFP	700001	0	CFP	700001	20241103_KGE-4460_L6_2d_d_Series007.ims	S:\AG\AG-Endres\Daten\Gertz-Kronenberg\von Majed\IMARIS\Microfetti\Ki-67 quantification\Data\2d\KGE4460\20241103_KGE-4460_L6_2d_d_Series007.ims
330	µm	Surface	Position	112	µm	Surface	Position	10400	µm	Surface	Position	0	6	0	1	CFP	700001	1	CFP	700001	20241103_KGE-4460_L6_2d_d_Series007.ims	S:\AG\AG-Endres\Daten\Gertz-Kronenberg\von Majed\IMARIS\Microfetti\Ki-67 quantification\Data\2d\KGE4460\20241103_KGE-4460_L6_2d_d_Series007.ims
64.6	µm	Surface	Position	241	µm	Surface	Position	10400	µm	Surface	Position	0	7	0	1	CFP	700001	2	CFP	700001	20241103_KGE-4460_L6_2d_d_Series007.ims	S:\AG\AG-Endres\Daten\Gertz-Kronenberg\von Majed\IMARIS\Microfetti\Ki-67 quantification\Data\2d\KGE4460\20241103_KGE-4460_L6_2d_d_Series007.ims
10.4	µm	Surface	Position	13.9	µm	Surface	Position	10400	µm	Surface	Position	0	8	0	1	CFP	700001	3	CFP	700001	20241103_KGE-4460_L6_2d_d_Series007.ims	S:\AG\AG-Endres\Daten\Gertz-Kronenberg\von Majed\IMARIS\Microfetti\Ki-67 quantification\Data\2d\KGE4460\20241103_KGE-4460_L6_2d_d_Series007.ims
347	µm	Surface	Position	291	µm	Surface	Position	10400	µm	Surface	Position	1	9	0	1	CFP	700001	0	CFP	700004	20241103_KGE-4460_L6_2d_e_Series009.ims	S:\AG\AG-Endres\Daten\Gertz-Kronenberg\von Majed\IMARIS\Microfetti\Ki-67 quantification\Data\2d\KGE4460\20241103_KGE-4460_L6_2d_e_Series009.ims
341	µm	Surface	Position	73.2	µm	Surface	Position	10400	µm	Surface	Position	1	10	0	1	CFP	700001	1	CFP	700004	20241103_KGE-4460_L6_2d_e_Series009.ims	S:\AG\AG-Endres\Daten\Gertz-Kronenberg\von Majed\IMARIS\Microfetti\Ki-67 quantification\Data\2d\KGE4460\20241103_KGE-4460_L6_2d_e_Series009.ims
252	µm	Surface	Position	324	µm	Surface	Position	10500	µm	Surface	Position	0	11	0	1	CFP	700001	0	CFP	700001	20241102_kge-4590_l6_2d_a_series001_b_series004.ims	S:\AG\AG-Endres\Daten\Gertz-Kronenberg\von Majed\IMARIS\Microfetti\Ki-67 quantification\Data\2d\KGE4590\20241102_kge-4590_l6_2d_a_series001_b_series004.ims
287	µm	Surface	Position	140	µm	Surface	Position	10500	µm	Surface	Position	0	12	0	1	CFP	700001	1	CFP	700001	20241102_kge-4590_l6_2d_a_series001_b_series004.ims	S:\AG\AG-Endres\Daten\Gertz-Kronenberg\von Majed\IMARIS\Microfetti\Ki-67 quantification\Data\2d\KGE4590\20241102_kge-4590_l6_2d_a_series001_b_series004.ims
49.2	µm	Surface	Position	93.7	µm	Surface	Position	10500	µm	Surface	Position	1	13	0	1	CFP	700001	5	CFP	700001	20241102_kge-4590_l6_2d_a_series001_b_series004.ims	S:\AG\AG-Endres\Daten\Gertz-Kronenberg\von Majed\IMARIS\Microfetti\Ki-67 quantification\Data\2d\KGE4590\20241102_kge-4590_l6_2d_a_series001_b_series004.ims
76.3	µm	Surface	Position	293	µm	Surface	Position	10500	µm	Surface	Position	0	14	0	1	CFP	700001	0	CFP	700001	20241102_kge-4590_l6_2d_a_series001_c_series006.ims	S:\AG\AG-Endres\Daten\Gertz-Kronenberg\von Majed\IMARIS\Microfetti\Ki-67 quantification\Data\2d\KGE4590\20241102_kge-4590_l6_2d_a_series001_c_series006.ims
183	µm	Surface	Position	235	µm	Surface	Position	10500	µm	Surface	Position	0	15	0	1	CFP	700001	0	CFP	700001	20241102_kge-4590_l6_2d_a_series001_d_series009.ims	S:\AG\AG-Endres\Daten\Gertz-Kronenberg\von Majed\IMARIS\Microfetti\Ki-67 quantification\Data\2d\KGE4590\20241102_kge-4590_l6_2d_a_series001_d_series009.ims
246	µm	Surface	Position	72.2	µm	Surface	Position	10500	µm	Surface	Position	0	16	0	1	CFP	700001	1	CFP	700001	20241102_kge-4590_l6_2d_a_series001_d_series009.ims	S:\AG\AG-Endres\Daten\Gertz-Kronenberg\von Majed\IMARIS\Microfetti\Ki-67 quantification\Data\2d\KGE4590\20241102_kge-4590_l6_2d_a_series001_d_series009.ims
290	µm	Surface	Position	194	µm	Surface	Position	10500	µm	Surface	Position	0	17	0	1	CFP	700001	4	CFP	700001	20241102_kge-4590_l6_2d_a_series001_e_series011.ims	S:\AG\AG-Endres\Daten\Gertz-Kronenberg\von Majed\IMARIS\Microfetti\Ki-67 quantification\Data\2d\KGE4590\20241102_kge-4590_l6_2d_a_series001_e_series011.ims
174	µm	Surface	Position	223	µm	Surface	Position	10500	µm	Surface	Position	0	18	0	1	CFP	700001	5	CFP	700001	20241102_kge-4590_l6_2d_a_series001_e_series011.ims	S:\AG\AG-Endres\Daten\Gertz-Kronenberg\von Majed\IMARIS\Microfetti\Ki-67 quantification\Data\2d\KGE4590\20241102_kge-4590_l6_2d_a_series001_e_series011.ims
170	µm	Surface	Position	234	µm	Surface	Position	10500	µm	Surface	Position	1	19	0	1	CFP	700001	6	CFP	700001	20241102_kge-4590_l6_2d_a_series001_e_series011.ims	S:\AG\AG-Endres\Daten\Gertz-Kronenberg\von Majed\IMARIS\Microfetti\Ki-67 quantification\Data\2d\KGE4590\20241102_kge-4590_l6_2d_a_series001_e_series011.ims
162	µm	Surface	Position	284	µm	Surface	Position	10500	µm	Surface	Position	1	20	0	1	CFP	700001	2	CFP	700001	20241102_kge-4590_l6_2d_a_series001_f_series013.ims	S:\AG\AG-Endres\Daten\Gertz-Kronenberg\von Majed\IMARIS\Microfetti\Ki-67 quantification\Data\2d\KGE4590\20241102_kge-4590_l6_2d_a_series001_f_series013.ims
136	µm	Surface	Position	189	µm	Surface	Position	10500	µm	Surface	Position	0	21	0	1	CFP	700001	4	CFP	700001	20241102_kge-4590_l6_2d_a_series001_f_series013.ims	S:\AG\AG-Endres\Daten\Gertz-Kronenberg\von Majed\IMARIS\Microfetti\Ki-67 quantification\Data\2d\KGE4590\20241102_kge-4590_l6_2d_a_series001_f_series013.ims
201	µm	Surface	Position	281	µm	Surface	Position	10300	µm	Surface	Position	1	22	0	1	CFP	700001	7	CFP	700001	20241102_KGE-4593_L6_2d_a_Series001.ims	S:\AG\AG-Endres\Daten\Gertz-Kronenberg\von Majed\IMARIS\Microfetti\Ki-67 quantification\Data\2d\KGE4593\20241102_KGE-4593_L6_2d_a_Series001.ims
176	µm	Surface	Position	293	µm	Surface	Position	10300	µm	Surface	Position	0	23	0	1	CFP	700001	9	CFP	700001	20241102_KGE-4593_L6_2d_a_Series001.ims	S:\AG\AG-Endres\Daten\Gertz-Kronenberg\von Majed\IMARIS\Microfetti\Ki-67 quantification\Data\2d\KGE4593\20241102_KGE-4593_L6_2d_a_Series001.ims
241	µm	Surface	Position	191	µm	Surface	Position	10400	µm	Surface	Position	1	24	0	1	CFP	700001	16	CFP	700001	20241102_KGE-4593_L6_2d_a_Series001.ims	S:\AG\AG-Endres\Daten\Gertz-Kronenberg\von Majed\IMARIS\Microfetti\Ki-67 quantification\Data\2d\KGE4593\20241102_KGE-4593_L6_2d_a_Series001.ims
216	µm	Surface	Position	169	µm	Surface	Position	10300	µm	Surface	Position	0	25	0	1	CFP	700001	29	CFP	700001	20241102_KGE-4593_L6_2d_a_Series001.ims	S:\AG\AG-Endres\Daten\Gertz-Kronenberg\von Majed\IMARIS\Microfetti\Ki-67 quantification\Data\2d\KGE4593\20241102_KGE-4593_L6_2d_a_Series001.ims
140	µm	Surface	Position	224	µm	Surface	Position	10300	µm	Surface	Position	0	26	0	1	CFP	700001	32	CFP	700001	20241102_KGE-4593_L6_2d_a_Series001.ims	S:\AG\AG-Endres\Daten\Gertz-Kronenberg\von Majed\IMARIS\Microfetti\Ki-67 quantification\Data\2d\KGE4593\20241102_KGE-4593_L6_2d_a_Series001.ims
86.7	µm	Surface	Position	245	µm	Surface	Position	10400	µm	Surface	Position	1	27	0	1	CFP	700001	39	CFP	700001	20241102_KGE-4593_L6_2d_a_Series001.ims	S:\AG\AG-Endres\Daten\Gertz-Kronenberg\von Majed\IMARIS\Microfetti\Ki-67 quantification\Data\2d\KGE4593\20241102_KGE-4593_L6_2d_a_Series001.ims
89.6	µm	Surface	Position	240	µm	Surface	Position	10400	µm	Surface	Position	1	28	0	1	CFP	700001	40	CFP	700001	20241102_KGE-4593_L6_2d_a_Series001.ims	S:\AG\AG-Endres\Daten\Gertz-Kronenberg\von Majed\IMARIS\Microfetti\Ki-67 quantification\Data\2d\KGE4593\20241102_KGE-4593_L6_2d_a_Series001.ims
172	µm	Surface	Position	291	µm	Surface	Position	10400	µm	Surface	Position	0	29	0	1	CFP	700001	0	CFP	700001	20241102_KGE-4593_L6_2d_b_Series003.ims	S:\AG\AG-Endres\Daten\Gertz-Kronenberg\von Majed\IMARIS\Microfetti\Ki-67 quantification\Data\2d\KGE4593\20241102_KGE-4593_L6_2d_b_Series003.ims
322	µm	Surface	Position	114	µm	Surface	Position	10400	µm	Surface	Position	0	30	0	1	CFP	700001	0	CFP	700001	20241102_KGE-4593_L6_2d_c_Series005.ims	S:\AG\AG-Endres\Daten\Gertz-Kronenberg\von Majed\IMARIS\Microfetti\Ki-67 quantification\Data\2d\KGE4593\20241102_KGE-4593_L6_2d_c_Series005.ims
148	µm	Surface	Position	277	µm	Surface	Position	10400	µm	Surface	Position	0	31	0	1	CFP	700001	1	CFP	700001	20241102_KGE-4593_L6_2d_c_Series005.ims	S:\AG\AG-Endres\Daten\Gertz-Kronenberg\von Majed\IMARIS\Microfetti\Ki-67 quantification\Data\2d\KGE4593\20241102_KGE-4593_L6_2d_c_Series005.ims
58.7	µm	Surface	Position	212	µm	Surface	Position	10400	µm	Surface	Position	0	32	0	1	CFP	700001	2	CFP	700001	20241102_KGE-4593_L6_2d_c_Series005.ims	S:\AG\AG-Endres\Daten\Gertz-Kronenberg\von Majed\IMARIS\Microfetti\Ki-67 quantification\Data\2d\KGE4593\20241102_KGE-4593_L6_2d_c_Series005.ims
101	µm	Surface	Position	101	µm	Surface	Position	10400	µm	Surface	Position	0	33	0	1	CFP	700001	3	CFP	700001	20241102_KGE-4593_L6_2d_c_Series005.ims	S:\AG\AG-Endres\Daten\Gertz-Kronenberg\von Majed\IMARIS\Microfetti\Ki-67 quantification\Data\2d\KGE4593\20241102_KGE-4593_L6_2d_c_Series005.ims
6.15	µm	Surface	Position	193	µm	Surface	Position	10300	µm	Surface	Position	1	34	0	1	CFP	700001	4	CFP	700001	20241102_KGE-4593_L6_2d_c_Series005.ims	S:\AG\AG-Endres\Daten\Gertz-Kronenberg\von Majed\IMARIS\Microfetti\Ki-67 quantification\Data\2d\KGE4593\20241102_KGE-4593_L6_2d_c_Series005.ims
98.8	µm	Surface	Position	49.3	µm	Surface	Position	10400	µm	Surface	Position	0	35	0	1	CFP	700001	6	CFP	700001	20241102_KGE-4593_L6_2d_c_Series005.ims	S:\AG\AG-Endres\Daten\Gertz-Kronenberg\von Majed\IMARIS\Microfetti\Ki-67 quantification\Data\2d\KGE4593\20241102_KGE-4593_L6_2d_c_Series005.ims
242	µm	Surface	Position	344	µm	Surface	Position	10300	µm	Surface	Position	1	36	0	1	CFP	700001	0	CFP	700001	20241102_KGE-4593_L6_2d_d_Series009.ims	S:\AG\AG-Endres\Daten\Gertz-Kronenberg\von Majed\IMARIS\Microfetti\Ki-67 quantification\Data\2d\KGE4593\20241102_KGE-4593_L6_2d_d_Series009.ims
345	µm	Surface	Position	106	µm	Surface	Position	10400	µm	Surface	Position	0	37	0	1	CFP	700001	1	CFP	700001	20241102_KGE-4593_L6_2d_d_Series009.ims	S:\AG\AG-Endres\Daten\Gertz-Kronenberg\von Majed\IMARIS\Microfetti\Ki-67 quantification\Data\2d\KGE4593\20241102_KGE-4593_L6_2d_d_Series009.ims
84.5	µm	Surface	Position	317	µm	Surface	Position	10400	µm	Surface	Position	1	38	0	1	CFP	700001	2	CFP	700001	20241102_KGE-4593_L6_2d_d_Series009.ims	S:\AG\AG-Endres\Daten\Gertz-Kronenberg\von Majed\IMARIS\Microfetti\Ki-67 quantification\Data\2d\KGE4593\20241102_KGE-4593_L6_2d_d_Series009.ims
61.2	µm	Surface	Position	281	µm	Surface	Position	10300	µm	Surface	Position	0	39	0	1	CFP	700001	3	CFP	700001	20241102_KGE-4593_L6_2d_d_Series009.ims	S:\AG\AG-Endres\Daten\Gertz-Kronenberg\von Majed\IMARIS\Microfetti\Ki-67 quantification\Data\2d\KGE4593\20241102_KGE-4593_L6_2d_d_Series009.ims
360	µm	Surface	Position	131	µm	Surface	Position	10300	µm	Surface	Position	0	40	0	1	CFP	700001	3	CFP	700001	20241102_KGE-4593_L6_2d_e_Series013.ims	S:\AG\AG-Endres\Daten\Gertz-Kronenberg\von Majed\IMARIS\Microfetti\Ki-67 quantification\Data\2d\KGE4593\20241102_KGE-4593_L6_2d_e_Series013.ims
120	µm	Surface	Position	239	µm	Surface	Position	10300	µm	Surface	Position	0	41	0	1	CFP	700001	5	CFP	700001	20241102_KGE-4593_L6_2d_e_Series013.ims	S:\AG\AG-Endres\Daten\Gertz-Kronenberg\von Majed\IMARIS\Microfetti\Ki-67 quantification\Data\2d\KGE4593\20241102_KGE-4593_L6_2d_e_Series013.ims
174	µm	Surface	Position	178	µm	Surface	Position	10300	µm	Surface	Position	0	42	0	1	CFP	700001	6	CFP	700001	20241102_KGE-4593_L6_2d_e_Series013.ims	S:\AG\AG-Endres\Daten\Gertz-Kronenberg\von Majed\IMARIS\Microfetti\Ki-67 quantification\Data\2d\KGE4593\20241102_KGE-4593_L6_2d_e_Series013.ims
208	µm	Surface	Position	93.8	µm	Surface	Position	10300	µm	Surface	Position	0	43	0	1	CFP	700001	8	CFP	700001	20241102_KGE-4593_L6_2d_e_Series013.ims	S:\AG\AG-Endres\Daten\Gertz-Kronenberg\von Majed\IMARIS\Microfetti\Ki-67 quantification\Data\2d\KGE4593\20241102_KGE-4593_L6_2d_e_Series013.ims
108	µm	Surface	Position	226	µm	Surface	Position	10300	µm	Surface	Position	1	44	0	1	CFP	700001	9	CFP	700001	20241102_KGE-4593_L6_2d_e_Series013.ims	S:\AG\AG-Endres\Daten\Gertz-Kronenberg\von Majed\IMARIS\Microfetti\Ki-67 quantification\Data\2d\KGE4593\20241102_KGE-4593_L6_2d_e_Series013.ims
23	µm	Surface	Position	308	µm	Surface	Position	10300	µm	Surface	Position	0	45	0	1	CFP	700001	10	CFP	700001	20241102_KGE-4593_L6_2d_e_Series013.ims	S:\AG\AG-Endres\Daten\Gertz-Kronenberg\von Majed\IMARIS\Microfetti\Ki-67 quantification\Data\2d\KGE4593\20241102_KGE-4593_L6_2d_e_Series013.ims
103	µm	Surface	Position	176	µm	Surface	Position	10300	µm	Surface	Position	1	46	0	1	CFP	700001	17	CFP	700001	20241102_KGE-4593_L6_2d_e_Series013.ims	S:\AG\AG-Endres\Daten\Gertz-Kronenberg\von Majed\IMARIS\Microfetti\Ki-67 quantification\Data\2d\KGE4593\20241102_KGE-4593_L6_2d_e_Series013.ims
259	µm	Surface	Position	245	µm	Surface	Position	10300	µm	Surface	Position	1	47	0	1	CFP	700001	0	CFP	700001	20241102_KGE-5193_L8_2d_a_Series001.ims	S:\AG\AG-Endres\Daten\Gertz-Kronenberg\von Majed\IMARIS\Microfetti\Ki-67 quantification\Data\2d\KGE5193\20241102_KGE-5193_L8_2d_a_Series001.ims
246	µm	Surface	Position	231	µm	Surface	Position	10300	µm	Surface	Position	1	48	0	1	CFP	700001	2	CFP	700001	20241102_KGE-5193_L8_2d_a_Series001.ims	S:\AG\AG-Endres\Daten\Gertz-Kronenberg\von Majed\IMARIS\Microfetti\Ki-67 quantification\Data\2d\KGE5193\20241102_KGE-5193_L8_2d_a_Series001.ims
317	µm	Surface	Position	133	µm	Surface	Position	10300	µm	Surface	Position	1	49	0	1	CFP	700001	3	CFP	700001	20241102_KGE-5193_L8_2d_a_Series001.ims	S:\AG\AG-Endres\Daten\Gertz-Kronenberg\von Majed\IMARIS\Microfetti\Ki-67 quantification\Data\2d\KGE5193\20241102_KGE-5193_L8_2d_a_Series001.ims
241	µm	Surface	Position	114	µm	Surface	Position	10300	µm	Surface	Position	1	50	0	1	CFP	700001	4	CFP	700001	20241102_KGE-5193_L8_2d_a_Series001.ims	S:\AG\AG-Endres\Daten\Gertz-Kronenberg\von Majed\IMARIS\Microfetti\Ki-67 quantification\Data\2d\KGE5193\20241102_KGE-5193_L8_2d_a_Series001.ims
189	µm	Surface	Position	160	µm	Surface	Position	10300	µm	Surface	Position	1	51	0	1	CFP	700001	6	CFP	700001	20241102_KGE-5193_L8_2d_a_Series001.ims	S:\AG\AG-Endres\Daten\Gertz-Kronenberg\von Majed\IMARIS\Microfetti\Ki-67 quantification\Data\2d\KGE5193\20241102_KGE-5193_L8_2d_a_Series001.ims
181	µm	Surface	Position	155	µm	Surface	Position	10300	µm	Surface	Position	0	52	0	1	CFP	700001	7	CFP	700001	20241102_KGE-5193_L8_2d_a_Series001.ims	S:\AG\AG-Endres\Daten\Gertz-Kronenberg\von Majed\IMARIS\Microfetti\Ki-67 quantification\Data\2d\KGE5193\20241102_KGE-5193_L8_2d_a_Series001.ims
25.5	µm	Surface	Position	241	µm	Surface	Position	10300	µm	Surface	Position	1	53	0	1	CFP	700001	12	CFP	700001	20241102_KGE-5193_L8_2d_a_Series001.ims	S:\AG\AG-Endres\Daten\Gertz-Kronenberg\von Majed\IMARIS\Microfetti\Ki-67 quantification\Data\2d\KGE5193\20241102_KGE-5193_L8_2d_a_Series001.ims
234	µm	Surface	Position	13.3	µm	Surface	Position	10300	µm	Surface	Position	1	54	0	1	CFP	700001	16	CFP	700001	20241102_KGE-5193_L8_2d_a_Series001.ims	S:\AG\AG-Endres\Daten\Gertz-Kronenberg\von Majed\IMARIS\Microfetti\Ki-67 quantification\Data\2d\KGE5193\20241102_KGE-5193_L8_2d_a_Series001.ims
57.2	µm	Surface	Position	130	µm	Surface	Position	10300	µm	Surface	Position	1	55	0	1	CFP	700001	19	CFP	700001	20241102_KGE-5193_L8_2d_a_Series001.ims	S:\AG\AG-Endres\Daten\Gertz-Kronenberg\von Majed\IMARIS\Microfetti\Ki-67 quantification\Data\2d\KGE5193\20241102_KGE-5193_L8_2d_a_Series001.ims
198	µm	Surface	Position	3.38	µm	Surface	Position	10300	µm	Surface	Position	0	56	0	1	CFP	700001	20	CFP	700001	20241102_KGE-5193_L8_2d_a_Series001.ims	S:\AG\AG-Endres\Daten\Gertz-Kronenberg\von Majed\IMARIS\Microfetti\Ki-67 quantification\Data\2d\KGE5193\20241102_KGE-5193_L8_2d_a_Series001.ims
364	µm	Surface	Position	169	µm	Surface	Position	10300	µm	Surface	Position	0	57	0	1	CFP	700001	0	CFP	700001	20241102_KGE-5193_L8_2d_b_Series003.ims	S:\AG\AG-Endres\Daten\Gertz-Kronenberg\von Majed\IMARIS\Microfetti\Ki-67 quantification\Data\2d\KGE5193\20241102_KGE-5193_L8_2d_b_Series003.ims
365	µm	Surface	Position	114	µm	Surface	Position	10300	µm	Surface	Position	0	58	0	1	CFP	700001	4	CFP	700001	20241102_KGE-5193_L8_2d_b_Series003.ims	S:\AG\AG-Endres\Daten\Gertz-Kronenberg\von Majed\IMARIS\Microfetti\Ki-67 quantification\Data\2d\KGE5193\20241102_KGE-5193_L8_2d_b_Series003.ims
258	µm	Surface	Position	146	µm	Surface	Position	10300	µm	Surface	Position	0	59	0	1	CFP	700001	6	CFP	700001	20241102_KGE-5193_L8_2d_b_Series003.ims	S:\AG\AG-Endres\Daten\Gertz-Kronenberg\von Majed\IMARIS\Microfetti\Ki-67 quantification\Data\2d\KGE5193\20241102_KGE-5193_L8_2d_b_Series003.ims
262	µm	Surface	Position	136	µm	Surface	Position	10300	µm	Surface	Position	0	60	0	1	CFP	700001	7	CFP	700001	20241102_KGE-5193_L8_2d_b_Series003.ims	S:\AG\AG-Endres\Daten\Gertz-Kronenberg\von Majed\IMARIS\Microfetti\Ki-67 quantification\Data\2d\KGE5193\20241102_KGE-5193_L8_2d_b_Series003.ims
7.24	µm	Surface	Position	305	µm	Surface	Position	10300	µm	Surface	Position	1	61	0	1	CFP	700001	9	CFP	700001	20241102_KGE-5193_L8_2d_b_Series003.ims	S:\AG\AG-Endres\Daten\Gertz-Kronenberg\von Majed\IMARIS\Microfetti\Ki-67 quantification\Data\2d\KGE5193\20241102_KGE-5193_L8_2d_b_Series003.ims
337	µm	Surface	Position	156	µm	Surface	Position	10300	µm	Surface	Position	0	62	0	1	CFP	700001	2	CFP	700001	20241102_KGE-5193_L8_2d_c_Series005.ims	S:\AG\AG-Endres\Daten\Gertz-Kronenberg\von Majed\IMARIS\Microfetti\Ki-67 quantification\Data\2d\KGE5193\20241102_KGE-5193_L8_2d_c_Series005.ims
94.9	µm	Surface	Position	70.6	µm	Surface	Position	10300	µm	Surface	Position	1	63	0	1	CFP	700001	4	CFP	700001	20241102_KGE-5193_L8_2d_c_Series005.ims	S:\AG\AG-Endres\Daten\Gertz-Kronenberg\von Majed\IMARIS\Microfetti\Ki-67 quantification\Data\2d\KGE5193\20241102_KGE-5193_L8_2d_c_Series005.ims
86.2	µm	Surface	Position	50.1	µm	Surface	Position	10300	µm	Surface	Position	1	64	0	1	CFP	700001	5	CFP	700001	20241102_KGE-5193_L8_2d_c_Series005.ims	S:\AG\AG-Endres\Daten\Gertz-Kronenberg\von Majed\IMARIS\Microfetti\Ki-67 quantification\Data\2d\KGE5193\20241102_KGE-5193_L8_2d_c_Series005.ims
366	µm	Surface	Position	114	µm	Surface	Position	10300	µm	Surface	Position	1	65	0	1	CFP	700001	2	CFP	700001	20241102_KGE-5193_L8_2d_d_Series007.ims	S:\AG\AG-Endres\Daten\Gertz-Kronenberg\von Majed\IMARIS\Microfetti\Ki-67 quantification\Data\2d\KGE5193\20241102_KGE-5193_L8_2d_d_Series007.ims
356	µm	Surface	Position	114	µm	Surface	Position	10300	µm	Surface	Position	0	66	0	1	CFP	700001	5	CFP	700001	20241102_KGE-5193_L8_2d_d_Series007.ims	S:\AG\AG-Endres\Daten\Gertz-Kronenberg\von Majed\IMARIS\Microfetti\Ki-67 quantification\Data\2d\KGE5193\20241102_KGE-5193_L8_2d_d_Series007.ims
329	µm	Surface	Position	70.8	µm	Surface	Position	10300	µm	Surface	Position	0	67	0	1	CFP	700001	12	CFP	700001	20241102_KGE-5193_L8_2d_d_Series007.ims	S:\AG\AG-Endres\Daten\Gertz-Kronenberg\von Majed\IMARIS\Microfetti\Ki-67 quantification\Data\2d\KGE5193\20241102_KGE-5193_L8_2d_d_Series007.ims
165	µm	Surface	Position	181	µm	Surface	Position	10300	µm	Surface	Position	0	68	0	1	CFP	700001	17	CFP	700001	20241102_KGE-5193_L8_2d_d_Series007.ims	S:\AG\AG-Endres\Daten\Gertz-Kronenberg\von Majed\IMARIS\Microfetti\Ki-67 quantification\Data\2d\KGE5193\20241102_KGE-5193_L8_2d_d_Series007.ims
111	µm	Surface	Position	157	µm	Surface	Position	10300	µm	Surface	Position	0	69	0	1	CFP	700001	26	CFP	700001	20241102_KGE-5193_L8_2d_d_Series007.ims	S:\AG\AG-Endres\Daten\Gertz-Kronenberg\von Majed\IMARIS\Microfetti\Ki-67 quantification\Data\2d\KGE5193\20241102_KGE-5193_L8_2d_d_Series007.ims
98.6	µm	Surface	Position	155	µm	Surface	Position	10300	µm	Surface	Position	1	70	0	1	CFP	700001	28	CFP	700001	20241102_KGE-5193_L8_2d_d_Series007.ims	S:\AG\AG-Endres\Daten\Gertz-Kronenberg\von Majed\IMARIS\Microfetti\Ki-67 quantification\Data\2d\KGE5193\20241102_KGE-5193_L8_2d_d_Series007.ims
158	µm	Surface	Position	168	µm	Surface	Position	10300	µm	Surface	Position	0	71	0	1	CFP	700001	33	CFP	700001	20241102_KGE-5193_L8_2d_d_Series007.ims	S:\AG\AG-Endres\Daten\Gertz-Kronenberg\von Majed\IMARIS\Microfetti\Ki-67 quantification\Data\2d\KGE5193\20241102_KGE-5193_L8_2d_d_Series007.ims
173	µm	Surface	Position	139	µm	Surface	Position	10300	µm	Surface	Position	1	72	0	1	CFP	700001	1	CFP	700001	20241102_KGE-5193_L8_2d_e_Series009.ims	S:\AG\AG-Endres\Daten\Gertz-Kronenberg\von Majed\IMARIS\Microfetti\Ki-67 quantification\Data\2d\KGE5193\20241102_KGE-5193_L8_2d_e_Series009.ims
164	µm	Surface	Position	139	µm	Surface	Position	10300	µm	Surface	Position	1	73	0	1	CFP	700001	2	CFP	700001	20241102_KGE-5193_L8_2d_e_Series009.ims	S:\AG\AG-Endres\Daten\Gertz-Kronenberg\von Majed\IMARIS\Microfetti\Ki-67 quantification\Data\2d\KGE5193\20241102_KGE-5193_L8_2d_e_Series009.ims
192	µm	Surface	Position	92.9	µm	Surface	Position	10300	µm	Surface	Position	0	74	0	1	CFP	700001	4	CFP	700001	20241102_KGE-5193_L8_2d_e_Series009.ims	S:\AG\AG-Endres\Daten\Gertz-Kronenberg\von Majed\IMARIS\Microfetti\Ki-67 quantification\Data\2d\KGE5193\20241102_KGE-5193_L8_2d_e_Series009.ims
328	µm	Surface	Position	226	µm	Surface	Position	10400	µm	Surface	Position	0	75	0	1	CFP	700001	0	CFP	700001	20241103_KGE-5319_L9_2d_a_Series001.ims	S:\AG\AG-Endres\Daten\Gertz-Kronenberg\von Majed\IMARIS\Microfetti\Ki-67 quantification\Data\2d\KGE5319\20241103_KGE-5319_L9_2d_a_Series001.ims
285	µm	Surface	Position	214	µm	Surface	Position	10500	µm	Surface	Position	0	76	0	1	CFP	700001	1	CFP	700001	20241103_KGE-5319_L9_2d_a_Series001.ims	S:\AG\AG-Endres\Daten\Gertz-Kronenberg\von Majed\IMARIS\Microfetti\Ki-67 quantification\Data\2d\KGE5319\20241103_KGE-5319_L9_2d_a_Series001.ims
82.8	µm	Surface	Position	291	µm	Surface	Position	10500	µm	Surface	Position	1	77	0	1	CFP	700001	2	CFP	700002	20241103_KGE-5319_L9_2d_c_Series005.ims	S:\AG\AG-Endres\Daten\Gertz-Kronenberg\von Majed\IMARIS\Microfetti\Ki-67 quantification\Data\2d\KGE5319\20241103_KGE-5319_L9_2d_c_Series005.ims
158	µm	Surface	Position	165	µm	Surface	Position	10400	µm	Surface	Position	1	78	0	1	CFP	700001	3	CFP	700002	20241103_KGE-5319_L9_2d_c_Series005.ims	S:\AG\AG-Endres\Daten\Gertz-Kronenberg\von Majed\IMARIS\Microfetti\Ki-67 quantification\Data\2d\KGE5319\20241103_KGE-5319_L9_2d_c_Series005.ims
337	µm	Surface	Position	274	µm	Surface	Position	10500	µm	Surface	Position	0	79	0	1	CFP	700001	1	CFP	700001	20241103_KGE-5319_L9_2d_d_Series007.ims	S:\AG\AG-Endres\Daten\Gertz-Kronenberg\von Majed\IMARIS\Microfetti\Ki-67 quantification\Data\2d\KGE5319\20241103_KGE-5319_L9_2d_d_Series007.ims
356	µm	Surface	Position	212	µm	Surface	Position	10500	µm	Surface	Position	1	80	0	1	CFP	700001	3	CFP	700001	20241103_KGE-5319_L9_2d_d_Series007.ims	S:\AG\AG-Endres\Daten\Gertz-Kronenberg\von Majed\IMARIS\Microfetti\Ki-67 quantification\Data\2d\KGE5319\20241103_KGE-5319_L9_2d_d_Series007.ims
351	µm	Surface	Position	152	µm	Surface	Position	10500	µm	Surface	Position	1	81	0	1	CFP	700001	6	CFP	700001	20241103_KGE-5319_L9_2d_d_Series007.ims	S:\AG\AG-Endres\Daten\Gertz-Kronenberg\von Majed\IMARIS\Microfetti\Ki-67 quantification\Data\2d\KGE5319\20241103_KGE-5319_L9_2d_d_Series007.ims
131	µm	Surface	Position	288	µm	Surface	Position	10500	µm	Surface	Position	0	82	0	1	CFP	700001	7	CFP	700001	20241103_KGE-5319_L9_2d_d_Series007.ims	S:\AG\AG-Endres\Daten\Gertz-Kronenberg\von Majed\IMARIS\Microfetti\Ki-67 quantification\Data\2d\KGE5319\20241103_KGE-5319_L9_2d_d_Series007.ims
138	µm	Surface	Position	296	µm	Surface	Position	10500	µm	Surface	Position	1	83	0	1	CFP	700001	8	CFP	700001	20241103_KGE-5319_L9_2d_d_Series007.ims	S:\AG\AG-Endres\Daten\Gertz-Kronenberg\von Majed\IMARIS\Microfetti\Ki-67 quantification\Data\2d\KGE5319\20241103_KGE-5319_L9_2d_d_Series007.ims
169	µm	Surface	Position	240	µm	Surface	Position	10500	µm	Surface	Position	0	84	0	1	CFP	700001	9	CFP	700001	20241103_KGE-5319_L9_2d_d_Series007.ims	S:\AG\AG-Endres\Daten\Gertz-Kronenberg\von Majed\IMARIS\Microfetti\Ki-67 quantification\Data\2d\KGE5319\20241103_KGE-5319_L9_2d_d_Series007.ims
153	µm	Surface	Position	239	µm	Surface	Position	10500	µm	Surface	Position	0	85	0	1	CFP	700001	10	CFP	700001	20241103_KGE-5319_L9_2d_d_Series007.ims	S:\AG\AG-Endres\Daten\Gertz-Kronenberg\von Majed\IMARIS\Microfetti\Ki-67 quantification\Data\2d\KGE5319\20241103_KGE-5319_L9_2d_d_Series007.ims
164	µm	Surface	Position	224	µm	Surface	Position	10500	µm	Surface	Position	0	86	0	1	CFP	700001	11	CFP	700001	20241103_KGE-5319_L9_2d_d_Series007.ims	S:\AG\AG-Endres\Daten\Gertz-Kronenberg\von Majed\IMARIS\Microfetti\Ki-67 quantification\Data\2d\KGE5319\20241103_KGE-5319_L9_2d_d_Series007.ims
363	µm	Surface	Position	246	µm	Surface	Position	10400	µm	Surface	Position	0	87	0	1	CFP	700001	0	CFP	700001	20241102_KGE-5321_L9_2d_a_Series001.ims	S:\AG\AG-Endres\Daten\Gertz-Kronenberg\von Majed\IMARIS\Microfetti\Ki-67 quantification\Data\2d\KGE5321\20241102_KGE-5321_L9_2d_a_Series001.ims
364	µm	Surface	Position	273	µm	Surface	Position	10400	µm	Surface	Position	0	88	0	1	CFP	700001	3	CFP	700001	20241102_KGE-5321_L9_2d_a_Series001.ims	S:\AG\AG-Endres\Daten\Gertz-Kronenberg\von Majed\IMARIS\Microfetti\Ki-67 quantification\Data\2d\KGE5321\20241102_KGE-5321_L9_2d_a_Series001.ims
235	µm	Surface	Position	342	µm	Surface	Position	10400	µm	Surface	Position	0	89	0	1	CFP	700001	4	CFP	700001	20241102_KGE-5321_L9_2d_a_Series001.ims	S:\AG\AG-Endres\Daten\Gertz-Kronenberg\von Majed\IMARIS\Microfetti\Ki-67 quantification\Data\2d\KGE5321\20241102_KGE-5321_L9_2d_a_Series001.ims
162	µm	Surface	Position	338	µm	Surface	Position	10400	µm	Surface	Position	0	90	0	1	CFP	700001	6	CFP	700001	20241102_KGE-5321_L9_2d_a_Series001.ims	S:\AG\AG-Endres\Daten\Gertz-Kronenberg\von Majed\IMARIS\Microfetti\Ki-67 quantification\Data\2d\KGE5321\20241102_KGE-5321_L9_2d_a_Series001.ims
156	µm	Surface	Position	346	µm	Surface	Position	10400	µm	Surface	Position	1	91	0	1	CFP	700001	8	CFP	700001	20241102_KGE-5321_L9_2d_a_Series001.ims	S:\AG\AG-Endres\Daten\Gertz-Kronenberg\von Majed\IMARIS\Microfetti\Ki-67 quantification\Data\2d\KGE5321\20241102_KGE-5321_L9_2d_a_Series001.ims
220	µm	Surface	Position	164	µm	Surface	Position	10400	µm	Surface	Position	0	92	0	1	CFP	700001	15	CFP	700001	20241102_KGE-5321_L9_2d_a_Series001.ims	S:\AG\AG-Endres\Daten\Gertz-Kronenberg\von Majed\IMARIS\Microfetti\Ki-67 quantification\Data\2d\KGE5321\20241102_KGE-5321_L9_2d_a_Series001.ims
146	µm	Surface	Position	282	µm	Surface	Position	10400	µm	Surface	Position	1	93	0	1	CFP	700001	16	CFP	700001	20241102_KGE-5321_L9_2d_a_Series001.ims	S:\AG\AG-Endres\Daten\Gertz-Kronenberg\von Majed\IMARIS\Microfetti\Ki-67 quantification\Data\2d\KGE5321\20241102_KGE-5321_L9_2d_a_Series001.ims
104	µm	Surface	Position	214	µm	Surface	Position	10400	µm	Surface	Position	0	94	0	1	CFP	700001	22	CFP	700001	20241102_KGE-5321_L9_2d_a_Series001.ims	S:\AG\AG-Endres\Daten\Gertz-Kronenberg\von Majed\IMARIS\Microfetti\Ki-67 quantification\Data\2d\KGE5321\20241102_KGE-5321_L9_2d_a_Series001.ims
227	µm	Surface	Position	38.9	µm	Surface	Position	10400	µm	Surface	Position	0	95	0	1	CFP	700001	29	CFP	700001	20241102_KGE-5321_L9_2d_a_Series001.ims	S:\AG\AG-Endres\Daten\Gertz-Kronenberg\von Majed\IMARIS\Microfetti\Ki-67 quantification\Data\2d\KGE5321\20241102_KGE-5321_L9_2d_a_Series001.ims
134	µm	Surface	Position	30.9	µm	Surface	Position	10400	µm	Surface	Position	0	96	0	1	CFP	700001	30	CFP	700001	20241102_KGE-5321_L9_2d_a_Series001.ims	S:\AG\AG-Endres\Daten\Gertz-Kronenberg\von Majed\IMARIS\Microfetti\Ki-67 quantification\Data\2d\KGE5321\20241102_KGE-5321_L9_2d_a_Series001.ims
289	µm	Surface	Position	332	µm	Surface	Position	10400	µm	Surface	Position	0	97	0	1	CFP	700001	0	CFP	700001	20241102_KGE-5321_L9_2d_b_Series003.ims	S:\AG\AG-Endres\Daten\Gertz-Kronenberg\von Majed\IMARIS\Microfetti\Ki-67 quantification\Data\2d\KGE5321\20241102_KGE-5321_L9_2d_b_Series003.ims
344	µm	Surface	Position	335	µm	Surface	Position	10400	µm	Surface	Position	1	98	0	1	CFP	700001	3	CFP	700001	20241102_KGE-5321_L9_2d_b_Series003.ims	S:\AG\AG-Endres\Daten\Gertz-Kronenberg\von Majed\IMARIS\Microfetti\Ki-67 quantification\Data\2d\KGE5321\20241102_KGE-5321_L9_2d_b_Series003.ims
282	µm	Surface	Position	131	µm	Surface	Position	10400	µm	Surface	Position	1	99	0	1	CFP	700001	9	CFP	700001	20241102_KGE-5321_L9_2d_b_Series003.ims	S:\AG\AG-Endres\Daten\Gertz-Kronenberg\von Majed\IMARIS\Microfetti\Ki-67 quantification\Data\2d\KGE5321\20241102_KGE-5321_L9_2d_b_Series003.ims
277	µm	Surface	Position	136	µm	Surface	Position	10400	µm	Surface	Position	0	100	0	1	CFP	700001	10	CFP	700001	20241102_KGE-5321_L9_2d_b_Series003.ims	S:\AG\AG-Endres\Daten\Gertz-Kronenberg\von Majed\IMARIS\Microfetti\Ki-67 quantification\Data\2d\KGE5321\20241102_KGE-5321_L9_2d_b_Series003.ims
162	µm	Surface	Position	269	µm	Surface	Position	10400	µm	Surface	Position	1	101	0	1	CFP	700001	11	CFP	700001	20241102_KGE-5321_L9_2d_b_Series003.ims	S:\AG\AG-Endres\Daten\Gertz-Kronenberg\von Majed\IMARIS\Microfetti\Ki-67 quantification\Data\2d\KGE5321\20241102_KGE-5321_L9_2d_b_Series003.ims
191	µm	Surface	Position	138	µm	Surface	Position	10400	µm	Surface	Position	1	102	0	1	CFP	700001	14	CFP	700001	20241102_KGE-5321_L9_2d_b_Series003.ims	S:\AG\AG-Endres\Daten\Gertz-Kronenberg\von Majed\IMARIS\Microfetti\Ki-67 quantification\Data\2d\KGE5321\20241102_KGE-5321_L9_2d_b_Series003.ims
43.2	µm	Surface	Position	253	µm	Surface	Position	10400	µm	Surface	Position	0	103	0	1	CFP	700001	15	CFP	700001	20241102_KGE-5321_L9_2d_b_Series003.ims	S:\AG\AG-Endres\Daten\Gertz-Kronenberg\von Majed\IMARIS\Microfetti\Ki-67 quantification\Data\2d\KGE5321\20241102_KGE-5321_L9_2d_b_Series003.ims
152	µm	Surface	Position	147	µm	Surface	Position	10400	µm	Surface	Position	0	104	0	1	CFP	700001	20	CFP	700001	20241102_KGE-5321_L9_2d_b_Series003.ims	S:\AG\AG-Endres\Daten\Gertz-Kronenberg\von Majed\IMARIS\Microfetti\Ki-67 quantification\Data\2d\KGE5321\20241102_KGE-5321_L9_2d_b_Series003.ims
265	µm	Surface	Position	87.2	µm	Surface	Position	10400	µm	Surface	Position	0	105	0	1	CFP	700001	3	CFP	700001	20241102_KGE-5321_L9_2d_c_Series005.ims	S:\AG\AG-Endres\Daten\Gertz-Kronenberg\von Majed\IMARIS\Microfetti\Ki-67 quantification\Data\2d\KGE5321\20241102_KGE-5321_L9_2d_c_Series005.ims
305	µm	Surface	Position	32.8	µm	Surface	Position	10400	µm	Surface	Position	0	106	0	1	CFP	700001	6	CFP	700001	20241102_KGE-5321_L9_2d_c_Series005.ims	S:\AG\AG-Endres\Daten\Gertz-Kronenberg\von Majed\IMARIS\Microfetti\Ki-67 quantification\Data\2d\KGE5321\20241102_KGE-5321_L9_2d_c_Series005.ims
126	µm	Surface	Position	183	µm	Surface	Position	10400	µm	Surface	Position	1	107	0	1	CFP	700001	9	CFP	700001	20241102_KGE-5321_L9_2d_c_Series005.ims	S:\AG\AG-Endres\Daten\Gertz-Kronenberg\von Majed\IMARIS\Microfetti\Ki-67 quantification\Data\2d\KGE5321\20241102_KGE-5321_L9_2d_c_Series005.ims
120	µm	Surface	Position	192	µm	Surface	Position	10400	µm	Surface	Position	0	108	0	1	CFP	700001	10	CFP	700001	20241102_KGE-5321_L9_2d_c_Series005.ims	S:\AG\AG-Endres\Daten\Gertz-Kronenberg\von Majed\IMARIS\Microfetti\Ki-67 quantification\Data\2d\KGE5321\20241102_KGE-5321_L9_2d_c_Series005.ims
131	µm	Surface	Position	162	µm	Surface	Position	10400	µm	Surface	Position	0	109	0	1	CFP	700001	11	CFP	700001	20241102_KGE-5321_L9_2d_c_Series005.ims	S:\AG\AG-Endres\Daten\Gertz-Kronenberg\von Majed\IMARIS\Microfetti\Ki-67 quantification\Data\2d\KGE5321\20241102_KGE-5321_L9_2d_c_Series005.ims
315	µm	Surface	Position	30.1	µm	Surface	Position	10400	µm	Surface	Position	0	110	0	1	CFP	700001	12	CFP	700001	20241102_KGE-5321_L9_2d_c_Series005.ims	S:\AG\AG-Endres\Daten\Gertz-Kronenberg\von Majed\IMARIS\Microfetti\Ki-67 quantification\Data\2d\KGE5321\20241102_KGE-5321_L9_2d_c_Series005.ims
117	µm	Surface	Position	183	µm	Surface	Position	10400	µm	Surface	Position	0	111	0	1	CFP	700001	15	CFP	700001	20241102_KGE-5321_L9_2d_c_Series005.ims	S:\AG\AG-Endres\Daten\Gertz-Kronenberg\von Majed\IMARIS\Microfetti\Ki-67 quantification\Data\2d\KGE5321\20241102_KGE-5321_L9_2d_c_Series005.ims
15.1	µm	Surface	Position	188	µm	Surface	Position	10400	µm	Surface	Position	0	112	0	1	CFP	700001	19	CFP	700001	20241102_KGE-5321_L9_2d_c_Series005.ims	S:\AG\AG-Endres\Daten\Gertz-Kronenberg\von Majed\IMARIS\Microfetti\Ki-67 quantification\Data\2d\KGE5321\20241102_KGE-5321_L9_2d_c_Series005.ims
29.8	µm	Surface	Position	56	µm	Surface	Position	10400	µm	Surface	Position	1	113	0	1	CFP	700001	21	CFP	700001	20241102_KGE-5321_L9_2d_c_Series005.ims	S:\AG\AG-Endres\Daten\Gertz-Kronenberg\von Majed\IMARIS\Microfetti\Ki-67 quantification\Data\2d\KGE5321\20241102_KGE-5321_L9_2d_c_Series005.ims
307	µm	Surface	Position	360	µm	Surface	Position	10400	µm	Surface	Position	0	114	0	1	CFP	700001	0	CFP	700001	20241102_KGE-5321_L9_2d_d_Series007.ims	S:\AG\AG-Endres\Daten\Gertz-Kronenberg\von Majed\IMARIS\Microfetti\Ki-67 quantification\Data\2d\KGE5321\20241102_KGE-5321_L9_2d_d_Series007.ims
213	µm	Surface	Position	237	µm	Surface	Position	10400	µm	Surface	Position	0	115	0	1	CFP	700001	5	CFP	700001	20241102_KGE-5321_L9_2d_d_Series007.ims	S:\AG\AG-Endres\Daten\Gertz-Kronenberg\von Majed\IMARIS\Microfetti\Ki-67 quantification\Data\2d\KGE5321\20241102_KGE-5321_L9_2d_d_Series007.ims
229	µm	Surface	Position	222	µm	Surface	Position	10400	µm	Surface	Position	0	116	0	1	CFP	700001	8	CFP	700001	20241102_KGE-5321_L9_2d_d_Series007.ims	S:\AG\AG-Endres\Daten\Gertz-Kronenberg\von Majed\IMARIS\Microfetti\Ki-67 quantification\Data\2d\KGE5321\20241102_KGE-5321_L9_2d_d_Series007.ims
354	µm	Surface	Position	98.9	µm	Surface	Position	10400	µm	Surface	Position	1	117	0	1	CFP	700001	11	CFP	700001	20241102_KGE-5321_L9_2d_d_Series007.ims	S:\AG\AG-Endres\Daten\Gertz-Kronenberg\von Majed\IMARIS\Microfetti\Ki-67 quantification\Data\2d\KGE5321\20241102_KGE-5321_L9_2d_d_Series007.ims
139	µm	Surface	Position	257	µm	Surface	Position	10400	µm	Surface	Position	0	118	0	1	CFP	700001	13	CFP	700001	20241102_KGE-5321_L9_2d_d_Series007.ims	S:\AG\AG-Endres\Daten\Gertz-Kronenberg\von Majed\IMARIS\Microfetti\Ki-67 quantification\Data\2d\KGE5321\20241102_KGE-5321_L9_2d_d_Series007.ims
231	µm	Surface	Position	15.8	µm	Surface	Position	10400	µm	Surface	Position	0	119	0	1	CFP	700001	14	CFP	700001	20241102_KGE-5321_L9_2d_d_Series007.ims	S:\AG\AG-Endres\Daten\Gertz-Kronenberg\von Majed\IMARIS\Microfetti\Ki-67 quantification\Data\2d\KGE5321\20241102_KGE-5321_L9_2d_d_Series007.ims
41.9	µm	Surface	Position	216	µm	Surface	Position	10400	µm	Surface	Position	0	120	0	1	CFP	700001	16	CFP	700001	20241102_KGE-5321_L9_2d_d_Series007.ims	S:\AG\AG-Endres\Daten\Gertz-Kronenberg\von Majed\IMARIS\Microfetti\Ki-67 quantification\Data\2d\KGE5321\20241102_KGE-5321_L9_2d_d_Series007.ims
247	µm	Surface	Position	17.1	µm	Surface	Position	10400	µm	Surface	Position	0	121	0	1	CFP	700001	17	CFP	700001	20241102_KGE-5321_L9_2d_d_Series007.ims	S:\AG\AG-Endres\Daten\Gertz-Kronenberg\von Majed\IMARIS\Microfetti\Ki-67 quantification\Data\2d\KGE5321\20241102_KGE-5321_L9_2d_d_Series007.ims
18.5	µm	Surface	Position	31.1	µm	Surface	Position	10400	µm	Surface	Position	0	122	0	1	CFP	700001	23	CFP	700001	20241102_KGE-5321_L9_2d_d_Series007.ims	S:\AG\AG-Endres\Daten\Gertz-Kronenberg\von Majed\IMARIS\Microfetti\Ki-67 quantification\Data\2d\KGE5321\20241102_KGE-5321_L9_2d_d_Series007.ims
33.7	µm	Surface	Position	24.3	µm	Surface	Position	10400	µm	Surface	Position	0	123	0	1	CFP	700001	24	CFP	700001	20241102_KGE-5321_L9_2d_d_Series007.ims	S:\AG\AG-Endres\Daten\Gertz-Kronenberg\von Majed\IMARIS\Microfetti\Ki-67 quantification\Data\2d\KGE5321\20241102_KGE-5321_L9_2d_d_Series007.ims
343	µm	Surface	Position	254	µm	Surface	Position	10400	µm	Surface	Position	0	124	0	1	CFP	700001	0	CFP	700001	20241102_KGE-5321_L9_2d_e_Series009.ims	S:\AG\AG-Endres\Daten\Gertz-Kronenberg\von Majed\IMARIS\Microfetti\Ki-67 quantification\Data\2d\KGE5321\20241102_KGE-5321_L9_2d_e_Series009.ims
260	µm	Surface	Position	344	µm	Surface	Position	10400	µm	Surface	Position	1	125	0	1	CFP	700001	1	CFP	700001	20241102_KGE-5321_L9_2d_e_Series009.ims	S:\AG\AG-Endres\Daten\Gertz-Kronenberg\von Majed\IMARIS\Microfetti\Ki-67 quantification\Data\2d\KGE5321\20241102_KGE-5321_L9_2d_e_Series009.ims
307	µm	Surface	Position	208	µm	Surface	Position	10400	µm	Surface	Position	0	126	0	1	CFP	700001	2	CFP	700001	20241102_KGE-5321_L9_2d_e_Series009.ims	S:\AG\AG-Endres\Daten\Gertz-Kronenberg\von Majed\IMARIS\Microfetti\Ki-67 quantification\Data\2d\KGE5321\20241102_KGE-5321_L9_2d_e_Series009.ims
343	µm	Surface	Position	132	µm	Surface	Position	10400	µm	Surface	Position	0	127	0	1	CFP	700001	3	CFP	700001	20241102_KGE-5321_L9_2d_e_Series009.ims	S:\AG\AG-Endres\Daten\Gertz-Kronenberg\von Majed\IMARIS\Microfetti\Ki-67 quantification\Data\2d\KGE5321\20241102_KGE-5321_L9_2d_e_Series009.ims
138	µm	Surface	Position	241	µm	Surface	Position	10400	µm	Surface	Position	1	128	0	1	CFP	700001	8	CFP	700001	20241102_KGE-5321_L9_2d_e_Series009.ims	S:\AG\AG-Endres\Daten\Gertz-Kronenberg\von Majed\IMARIS\Microfetti\Ki-67 quantification\Data\2d\KGE5321\20241102_KGE-5321_L9_2d_e_Series009.ims
149	µm	Surface	Position	250	µm	Surface	Position	10400	µm	Surface	Position	0	129	0	1	CFP	700001	9	CFP	700001	20241102_KGE-5321_L9_2d_e_Series009.ims	S:\AG\AG-Endres\Daten\Gertz-Kronenberg\von Majed\IMARIS\Microfetti\Ki-67 quantification\Data\2d\KGE5321\20241102_KGE-5321_L9_2d_e_Series009.ims
175	µm	Surface	Position	116	µm	Surface	Position	10400	µm	Surface	Position	0	130	0	1	CFP	700001	13	CFP	700001	20241102_KGE-5321_L9_2d_e_Series009.ims	S:\AG\AG-Endres\Daten\Gertz-Kronenberg\von Majed\IMARIS\Microfetti\Ki-67 quantification\Data\2d\KGE5321\20241102_KGE-5321_L9_2d_e_Series009.ims
266	µm	Surface	Position	11	µm	Surface	Position	10400	µm	Surface	Position	0	131	0	1	CFP	700001	14	CFP	700001	20241102_KGE-5321_L9_2d_e_Series009.ims	S:\AG\AG-Endres\Daten\Gertz-Kronenberg\von Majed\IMARIS\Microfetti\Ki-67 quantification\Data\2d\KGE5321\20241102_KGE-5321_L9_2d_e_Series009.ims
160	µm	Surface	Position	107	µm	Surface	Position	10400	µm	Surface	Position	0	132	0	1	CFP	700001	16	CFP	700001	20241102_KGE-5321_L9_2d_e_Series009.ims	S:\AG\AG-Endres\Daten\Gertz-Kronenberg\von Majed\IMARIS\Microfetti\Ki-67 quantification\Data\2d\KGE5321\20241102_KGE-5321_L9_2d_e_Series009.ims
33.2	µm	Surface	Position	161	µm	Surface	Position	10400	µm	Surface	Position	0	133	0	1	CFP	700001	19	CFP	700001	20241102_KGE-5321_L9_2d_e_Series009.ims	S:\AG\AG-Endres\Daten\Gertz-Kronenberg\von Majed\IMARIS\Microfetti\Ki-67 quantification\Data\2d\KGE5321\20241102_KGE-5321_L9_2d_e_Series009.ims
16.4	µm	Surface	Position	155	µm	Surface	Position	10400	µm	Surface	Position	0	134	0	1	CFP	700001	21	CFP	700001	20241102_KGE-5321_L9_2d_e_Series009.ims	S:\AG\AG-Endres\Daten\Gertz-Kronenberg\von Majed\IMARIS\Microfetti\Ki-67 quantification\Data\2d\KGE5321\20241102_KGE-5321_L9_2d_e_Series009.ims
38.1	µm	Surface	Position	14.4	µm	Surface	Position	10400	µm	Surface	Position	0	135	0	1	CFP	700001	25	CFP	700001	20241102_KGE-5321_L9_2d_e_Series009.ims	S:\AG\AG-Endres\Daten\Gertz-Kronenberg\von Majed\IMARIS\Microfetti\Ki-67 quantification\Data\2d\KGE5321\20241102_KGE-5321_L9_2d_e_Series009.ims
64.3	µm	Surface	Position	159	µm	Surface	Position	10400	µm	Surface	Position	1	2	0	1	GFP	700002	2	GFP	700002	20241103_KGE-4460_L6_2d_a_Series001.ims	S:\AG\AG-Endres\Daten\Gertz-Kronenberg\von Majed\IMARIS\Microfetti\Ki-67 quantification\Data\2d\KGE4460\20241103_KGE-4460_L6_2d_a_Series001.ims
228	µm	Surface	Position	215	µm	Surface	Position	10400	µm	Surface	Position	1	3	0	1	GFP	700002	10	GFP	700002	20241103_KGE-4460_L6_2d_b_Series003.ims	S:\AG\AG-Endres\Daten\Gertz-Kronenberg\von Majed\IMARIS\Microfetti\Ki-67 quantification\Data\2d\KGE4460\20241103_KGE-4460_L6_2d_b_Series003.ims
205	µm	Surface	Position	184	µm	Surface	Position	10400	µm	Surface	Position	1	4	0	1	GFP	700002	11	GFP	700002	20241103_KGE-4460_L6_2d_b_Series003.ims	S:\AG\AG-Endres\Daten\Gertz-Kronenberg\von Majed\IMARIS\Microfetti\Ki-67 quantification\Data\2d\KGE4460\20241103_KGE-4460_L6_2d_b_Series003.ims
283	µm	Surface	Position	86.2	µm	Surface	Position	10400	µm	Surface	Position	0	5	0	1	GFP	700002	12	GFP	700002	20241103_KGE-4460_L6_2d_b_Series003.ims	S:\AG\AG-Endres\Daten\Gertz-Kronenberg\von Majed\IMARIS\Microfetti\Ki-67 quantification\Data\2d\KGE4460\20241103_KGE-4460_L6_2d_b_Series003.ims
225	µm	Surface	Position	30.2	µm	Surface	Position	10400	µm	Surface	Position	1	6	0	1	GFP	700002	14	GFP	700002	20241103_KGE-4460_L6_2d_b_Series003.ims	S:\AG\AG-Endres\Daten\Gertz-Kronenberg\von Majed\IMARIS\Microfetti\Ki-67 quantification\Data\2d\KGE4460\20241103_KGE-4460_L6_2d_b_Series003.ims
24.2	µm	Surface	Position	156	µm	Surface	Position	10400	µm	Surface	Position	1	7	0	1	GFP	700002	15	GFP	700002	20241103_KGE-4460_L6_2d_b_Series003.ims	S:\AG\AG-Endres\Daten\Gertz-Kronenberg\von Majed\IMARIS\Microfetti\Ki-67 quantification\Data\2d\KGE4460\20241103_KGE-4460_L6_2d_b_Series003.ims
26.6	µm	Surface	Position	22.5	µm	Surface	Position	10400	µm	Surface	Position	0	8	0	1	GFP	700002	0	GFP	700002	20241103_KGE-4460_L6_2d_c_Series005.ims	S:\AG\AG-Endres\Daten\Gertz-Kronenberg\von Majed\IMARIS\Microfetti\Ki-67 quantification\Data\2d\KGE4460\20241103_KGE-4460_L6_2d_c_Series005.ims
242	µm	Surface	Position	45.1	µm	Surface	Position	10400	µm	Surface	Position	0	9	0	1	GFP	700002	9	GFP	700002	20241103_KGE-4460_L6_2d_d_Series007.ims	S:\AG\AG-Endres\Daten\Gertz-Kronenberg\von Majed\IMARIS\Microfetti\Ki-67 quantification\Data\2d\KGE4460\20241103_KGE-4460_L6_2d_d_Series007.ims
136	µm	Surface	Position	98.8	µm	Surface	Position	10400	µm	Surface	Position	0	10	0	1	GFP	700002	10	GFP	700002	20241103_KGE-4460_L6_2d_d_Series007.ims	S:\AG\AG-Endres\Daten\Gertz-Kronenberg\von Majed\IMARIS\Microfetti\Ki-67 quantification\Data\2d\KGE4460\20241103_KGE-4460_L6_2d_d_Series007.ims
159	µm	Surface	Position	105	µm	Surface	Position	10500	µm	Surface	Position	0	11	0	1	GFP	700002	0	GFP	700002	20241103_KGE-4460_L6_2d_e_Series009.ims	S:\AG\AG-Endres\Daten\Gertz-Kronenberg\von Majed\IMARIS\Microfetti\Ki-67 quantification\Data\2d\KGE4460\20241103_KGE-4460_L6_2d_e_Series009.ims
101	µm	Surface	Position	53.2	µm	Surface	Position	10500	µm	Surface	Position	1	12	0	1	GFP	700002	0	GFP	700002	20241102_kge-4590_l6_2d_a_series001_a_series001.ims	S:\AG\AG-Endres\Daten\Gertz-Kronenberg\von Majed\IMARIS\Microfetti\Ki-67 quantification\Data\2d\KGE4590\20241102_kge-4590_l6_2d_a_series001_a_series001.ims
104	µm	Surface	Position	49.2	µm	Surface	Position	10500	µm	Surface	Position	1	13	0	1	GFP	700002	1	GFP	700002	20241102_kge-4590_l6_2d_a_series001_a_series001.ims	S:\AG\AG-Endres\Daten\Gertz-Kronenberg\von Majed\IMARIS\Microfetti\Ki-67 quantification\Data\2d\KGE4590\20241102_kge-4590_l6_2d_a_series001_a_series001.ims
98.2	µm	Surface	Position	38.8	µm	Surface	Position	10500	µm	Surface	Position	1	14	0	1	GFP	700002	2	GFP	700002	20241102_kge-4590_l6_2d_a_series001_a_series001.ims	S:\AG\AG-Endres\Daten\Gertz-Kronenberg\von Majed\IMARIS\Microfetti\Ki-67 quantification\Data\2d\KGE4590\20241102_kge-4590_l6_2d_a_series001_a_series001.ims
135	µm	Surface	Position	308	µm	Surface	Position	10500	µm	Surface	Position	0	15	0	1	GFP	700002	16	GFP	700002	20241102_kge-4590_l6_2d_a_series001_b_series004.ims	S:\AG\AG-Endres\Daten\Gertz-Kronenberg\von Majed\IMARIS\Microfetti\Ki-67 quantification\Data\2d\KGE4590\20241102_kge-4590_l6_2d_a_series001_b_series004.ims
326	µm	Surface	Position	284	µm	Surface	Position	10500	µm	Surface	Position	0	16	0	1	GFP	700002	7	GFP	700002	20241102_kge-4590_l6_2d_a_series001_c_series006.ims	S:\AG\AG-Endres\Daten\Gertz-Kronenberg\von Majed\IMARIS\Microfetti\Ki-67 quantification\Data\2d\KGE4590\20241102_kge-4590_l6_2d_a_series001_c_series006.ims
251	µm	Surface	Position	309	µm	Surface	Position	10500	µm	Surface	Position	1	17	0	1	GFP	700002	0	GFP	700002	20241102_kge-4590_l6_2d_a_series001_e_series011.ims	S:\AG\AG-Endres\Daten\Gertz-Kronenberg\von Majed\IMARIS\Microfetti\Ki-67 quantification\Data\2d\KGE4590\20241102_kge-4590_l6_2d_a_series001_e_series011.ims
246	µm	Surface	Position	307	µm	Surface	Position	10500	µm	Surface	Position	1	18	0	1	GFP	700002	4	GFP	700002	20241102_kge-4590_l6_2d_a_series001_e_series011.ims	S:\AG\AG-Endres\Daten\Gertz-Kronenberg\von Majed\IMARIS\Microfetti\Ki-67 quantification\Data\2d\KGE4590\20241102_kge-4590_l6_2d_a_series001_e_series011.ims
254	µm	Surface	Position	176	µm	Surface	Position	10500	µm	Surface	Position	0	19	0	1	GFP	700002	10	GFP	700002	20241102_kge-4590_l6_2d_a_series001_e_series011.ims	S:\AG\AG-Endres\Daten\Gertz-Kronenberg\von Majed\IMARIS\Microfetti\Ki-67 quantification\Data\2d\KGE4590\20241102_kge-4590_l6_2d_a_series001_e_series011.ims
126	µm	Surface	Position	165	µm	Surface	Position	10500	µm	Surface	Position	0	20	0	1	GFP	700002	14	GFP	700002	20241102_kge-4590_l6_2d_a_series001_e_series011.ims	S:\AG\AG-Endres\Daten\Gertz-Kronenberg\von Majed\IMARIS\Microfetti\Ki-67 quantification\Data\2d\KGE4590\20241102_kge-4590_l6_2d_a_series001_e_series011.ims
261	µm	Surface	Position	128	µm	Surface	Position	10500	µm	Surface	Position	0	21	0	1	GFP	700002	1	GFP	700002	20241102_kge-4590_l6_2d_a_series001_f_series013.ims	S:\AG\AG-Endres\Daten\Gertz-Kronenberg\von Majed\IMARIS\Microfetti\Ki-67 quantification\Data\2d\KGE4590\20241102_kge-4590_l6_2d_a_series001_f_series013.ims
193	µm	Surface	Position	181	µm	Surface	Position	10500	µm	Surface	Position	1	22	0	1	GFP	700002	2	GFP	700002	20241102_kge-4590_l6_2d_a_series001_f_series013.ims	S:\AG\AG-Endres\Daten\Gertz-Kronenberg\von Majed\IMARIS\Microfetti\Ki-67 quantification\Data\2d\KGE4590\20241102_kge-4590_l6_2d_a_series001_f_series013.ims
109	µm	Surface	Position	148	µm	Surface	Position	10500	µm	Surface	Position	0	23	0	1	GFP	700002	3	GFP	700002	20241102_kge-4590_l6_2d_a_series001_f_series013.ims	S:\AG\AG-Endres\Daten\Gertz-Kronenberg\von Majed\IMARIS\Microfetti\Ki-67 quantification\Data\2d\KGE4590\20241102_kge-4590_l6_2d_a_series001_f_series013.ims
83.3	µm	Surface	Position	120	µm	Surface	Position	10500	µm	Surface	Position	0	24	0	1	GFP	700002	4	GFP	700002	20241102_kge-4590_l6_2d_a_series001_f_series013.ims	S:\AG\AG-Endres\Daten\Gertz-Kronenberg\von Majed\IMARIS\Microfetti\Ki-67 quantification\Data\2d\KGE4590\20241102_kge-4590_l6_2d_a_series001_f_series013.ims
185	µm	Surface	Position	243	µm	Surface	Position	10400	µm	Surface	Position	1	25	0	1	GFP	700002	0	GFP	700002	20241102_KGE-4593_L6_2d_a_Series001.ims	S:\AG\AG-Endres\Daten\Gertz-Kronenberg\von Majed\IMARIS\Microfetti\Ki-67 quantification\Data\2d\KGE4593\20241102_KGE-4593_L6_2d_a_Series001.ims
226	µm	Surface	Position	315	µm	Surface	Position	10400	µm	Surface	Position	1	26	0	1	GFP	700002	2	GFP	700002	20241102_KGE-4593_L6_2d_a_Series001.ims	S:\AG\AG-Endres\Daten\Gertz-Kronenberg\von Majed\IMARIS\Microfetti\Ki-67 quantification\Data\2d\KGE4593\20241102_KGE-4593_L6_2d_a_Series001.ims
150	µm	Surface	Position	281	µm	Surface	Position	10400	µm	Surface	Position	1	27	0	1	GFP	700002	3	GFP	700002	20241102_KGE-4593_L6_2d_a_Series001.ims	S:\AG\AG-Endres\Daten\Gertz-Kronenberg\von Majed\IMARIS\Microfetti\Ki-67 quantification\Data\2d\KGE4593\20241102_KGE-4593_L6_2d_a_Series001.ims
185	µm	Surface	Position	233	µm	Surface	Position	10400	µm	Surface	Position	1	28	0	1	GFP	700002	4	GFP	700002	20241102_KGE-4593_L6_2d_a_Series001.ims	S:\AG\AG-Endres\Daten\Gertz-Kronenberg\von Majed\IMARIS\Microfetti\Ki-67 quantification\Data\2d\KGE4593\20241102_KGE-4593_L6_2d_a_Series001.ims
311	µm	Surface	Position	72.9	µm	Surface	Position	10400	µm	Surface	Position	1	29	0	1	GFP	700002	5	GFP	700002	20241102_KGE-4593_L6_2d_a_Series001.ims	S:\AG\AG-Endres\Daten\Gertz-Kronenberg\von Majed\IMARIS\Microfetti\Ki-67 quantification\Data\2d\KGE4593\20241102_KGE-4593_L6_2d_a_Series001.ims
83.9	µm	Surface	Position	217	µm	Surface	Position	10400	µm	Surface	Position	1	30	0	1	GFP	700002	7	GFP	700002	20241102_KGE-4593_L6_2d_a_Series001.ims	S:\AG\AG-Endres\Daten\Gertz-Kronenberg\von Majed\IMARIS\Microfetti\Ki-67 quantification\Data\2d\KGE4593\20241102_KGE-4593_L6_2d_a_Series001.ims
87.1	µm	Surface	Position	204	µm	Surface	Position	10400	µm	Surface	Position	1	31	0	1	GFP	700002	8	GFP	700002	20241102_KGE-4593_L6_2d_a_Series001.ims	S:\AG\AG-Endres\Daten\Gertz-Kronenberg\von Majed\IMARIS\Microfetti\Ki-67 quantification\Data\2d\KGE4593\20241102_KGE-4593_L6_2d_a_Series001.ims
75.9	µm	Surface	Position	187	µm	Surface	Position	10400	µm	Surface	Position	1	32	0	1	GFP	700002	9	GFP	700002	20241102_KGE-4593_L6_2d_a_Series001.ims	S:\AG\AG-Endres\Daten\Gertz-Kronenberg\von Majed\IMARIS\Microfetti\Ki-67 quantification\Data\2d\KGE4593\20241102_KGE-4593_L6_2d_a_Series001.ims
286	µm	Surface	Position	274	µm	Surface	Position	10400	µm	Surface	Position	0	33	0	1	GFP	700002	0	GFP	700002	20241102_KGE-4593_L6_2d_b_Series003.ims	S:\AG\AG-Endres\Daten\Gertz-Kronenberg\von Majed\IMARIS\Microfetti\Ki-67 quantification\Data\2d\KGE4593\20241102_KGE-4593_L6_2d_b_Series003.ims
158	µm	Surface	Position	310	µm	Surface	Position	10400	µm	Surface	Position	0	34	0	1	GFP	700002	1	GFP	700002	20241102_KGE-4593_L6_2d_b_Series003.ims	S:\AG\AG-Endres\Daten\Gertz-Kronenberg\von Majed\IMARIS\Microfetti\Ki-67 quantification\Data\2d\KGE4593\20241102_KGE-4593_L6_2d_b_Series003.ims
215	µm	Surface	Position	13.5	µm	Surface	Position	10400	µm	Surface	Position	0	35	0	1	GFP	700002	2	GFP	700002	20241102_KGE-4593_L6_2d_b_Series003.ims	S:\AG\AG-Endres\Daten\Gertz-Kronenberg\von Majed\IMARIS\Microfetti\Ki-67 quantification\Data\2d\KGE4593\20241102_KGE-4593_L6_2d_b_Series003.ims
80.7	µm	Surface	Position	140	µm	Surface	Position	10300	µm	Surface	Position	1	36	0	1	GFP	700002	3	GFP	700002	20241102_KGE-4593_L6_2d_b_Series003.ims	S:\AG\AG-Endres\Daten\Gertz-Kronenberg\von Majed\IMARIS\Microfetti\Ki-67 quantification\Data\2d\KGE4593\20241102_KGE-4593_L6_2d_b_Series003.ims
117	µm	Surface	Position	286	µm	Surface	Position	10400	µm	Surface	Position	0	37	0	1	GFP	700002	0	GFP	700002	20241102_KGE-4593_L6_2d_c_Series005.ims	S:\AG\AG-Endres\Daten\Gertz-Kronenberg\von Majed\IMARIS\Microfetti\Ki-67 quantification\Data\2d\KGE4593\20241102_KGE-4593_L6_2d_c_Series005.ims
158	µm	Surface	Position	33.1	µm	Surface	Position	10400	µm	Surface	Position	0	38	0	1	GFP	700002	1	GFP	700002	20241102_KGE-4593_L6_2d_c_Series005.ims	S:\AG\AG-Endres\Daten\Gertz-Kronenberg\von Majed\IMARIS\Microfetti\Ki-67 quantification\Data\2d\KGE4593\20241102_KGE-4593_L6_2d_c_Series005.ims
353	µm	Surface	Position	191	µm	Surface	Position	10400	µm	Surface	Position	0	39	0	1	GFP	700002	3	GFP	700002	20241102_KGE-4593_L6_2d_d_Series009.ims	S:\AG\AG-Endres\Daten\Gertz-Kronenberg\von Majed\IMARIS\Microfetti\Ki-67 quantification\Data\2d\KGE4593\20241102_KGE-4593_L6_2d_d_Series009.ims
111	µm	Surface	Position	309	µm	Surface	Position	10300	µm	Surface	Position	1	40	0	1	GFP	700002	11	GFP	700002	20241102_KGE-4593_L6_2d_d_Series009.ims	S:\AG\AG-Endres\Daten\Gertz-Kronenberg\von Majed\IMARIS\Microfetti\Ki-67 quantification\Data\2d\KGE4593\20241102_KGE-4593_L6_2d_d_Series009.ims
121	µm	Surface	Position	274	µm	Surface	Position	10300	µm	Surface	Position	0	41	0	1	GFP	700002	12	GFP	700002	20241102_KGE-4593_L6_2d_d_Series009.ims	S:\AG\AG-Endres\Daten\Gertz-Kronenberg\von Majed\IMARIS\Microfetti\Ki-67 quantification\Data\2d\KGE4593\20241102_KGE-4593_L6_2d_d_Series009.ims
181	µm	Surface	Position	33.8	µm	Surface	Position	10300	µm	Surface	Position	0	42	0	1	GFP	700002	19	GFP	700002	20241102_KGE-4593_L6_2d_d_Series009.ims	S:\AG\AG-Endres\Daten\Gertz-Kronenberg\von Majed\IMARIS\Microfetti\Ki-67 quantification\Data\2d\KGE4593\20241102_KGE-4593_L6_2d_d_Series009.ims
237	µm	Surface	Position	328	µm	Surface	Position	10300	µm	Surface	Position	0	43	0	1	GFP	700002	0	GFP	700002	20241102_KGE-4593_L6_2d_e_Series013.ims	S:\AG\AG-Endres\Daten\Gertz-Kronenberg\von Majed\IMARIS\Microfetti\Ki-67 quantification\Data\2d\KGE4593\20241102_KGE-4593_L6_2d_e_Series013.ims
290	µm	Surface	Position	271	µm	Surface	Position	10300	µm	Surface	Position	0	44	0	1	GFP	700002	1	GFP	700002	20241102_KGE-4593_L6_2d_e_Series013.ims	S:\AG\AG-Endres\Daten\Gertz-Kronenberg\von Majed\IMARIS\Microfetti\Ki-67 quantification\Data\2d\KGE4593\20241102_KGE-4593_L6_2d_e_Series013.ims
308	µm	Surface	Position	153	µm	Surface	Position	10300	µm	Surface	Position	0	45	0	1	GFP	700002	2	GFP	700002	20241102_KGE-4593_L6_2d_e_Series013.ims	S:\AG\AG-Endres\Daten\Gertz-Kronenberg\von Majed\IMARIS\Microfetti\Ki-67 quantification\Data\2d\KGE4593\20241102_KGE-4593_L6_2d_e_Series013.ims
100	µm	Surface	Position	319	µm	Surface	Position	10400	µm	Surface	Position	0	46	0	1	GFP	700002	3	GFP	700002	20241102_KGE-4593_L6_2d_e_Series013.ims	S:\AG\AG-Endres\Daten\Gertz-Kronenberg\von Majed\IMARIS\Microfetti\Ki-67 quantification\Data\2d\KGE4593\20241102_KGE-4593_L6_2d_e_Series013.ims
133	µm	Surface	Position	201	µm	Surface	Position	10400	µm	Surface	Position	0	47	0	1	GFP	700002	4	GFP	700002	20241102_KGE-4593_L6_2d_e_Series013.ims	S:\AG\AG-Endres\Daten\Gertz-Kronenberg\von Majed\IMARIS\Microfetti\Ki-67 quantification\Data\2d\KGE4593\20241102_KGE-4593_L6_2d_e_Series013.ims
254	µm	Surface	Position	13.4	µm	Surface	Position	10400	µm	Surface	Position	0	48	0	1	GFP	700002	5	GFP	700002	20241102_KGE-4593_L6_2d_e_Series013.ims	S:\AG\AG-Endres\Daten\Gertz-Kronenberg\von Majed\IMARIS\Microfetti\Ki-67 quantification\Data\2d\KGE4593\20241102_KGE-4593_L6_2d_e_Series013.ims
61.7	µm	Surface	Position	69.2	µm	Surface	Position	10300	µm	Surface	Position	1	49	0	1	GFP	700002	6	GFP	700002	20241102_KGE-4593_L6_2d_e_Series013.ims	S:\AG\AG-Endres\Daten\Gertz-Kronenberg\von Majed\IMARIS\Microfetti\Ki-67 quantification\Data\2d\KGE4593\20241102_KGE-4593_L6_2d_e_Series013.ims
166	µm	Surface	Position	284	µm	Surface	Position	10300	µm	Surface	Position	1	50	0	1	GFP	700002	2	GFP	700002	20241102_KGE-5193_L8_2d_a_Series001.ims	S:\AG\AG-Endres\Daten\Gertz-Kronenberg\von Majed\IMARIS\Microfetti\Ki-67 quantification\Data\2d\KGE5193\20241102_KGE-5193_L8_2d_a_Series001.ims
176	µm	Surface	Position	265	µm	Surface	Position	10300	µm	Surface	Position	1	51	0	1	GFP	700002	3	GFP	700002	20241102_KGE-5193_L8_2d_a_Series001.ims	S:\AG\AG-Endres\Daten\Gertz-Kronenberg\von Majed\IMARIS\Microfetti\Ki-67 quantification\Data\2d\KGE5193\20241102_KGE-5193_L8_2d_a_Series001.ims
233	µm	Surface	Position	156	µm	Surface	Position	10300	µm	Surface	Position	1	52	0	1	GFP	700002	4	GFP	700002	20241102_KGE-5193_L8_2d_a_Series001.ims	S:\AG\AG-Endres\Daten\Gertz-Kronenberg\von Majed\IMARIS\Microfetti\Ki-67 quantification\Data\2d\KGE5193\20241102_KGE-5193_L8_2d_a_Series001.ims
226	µm	Surface	Position	159	µm	Surface	Position	10300	µm	Surface	Position	1	53	0	1	GFP	700002	5	GFP	700002	20241102_KGE-5193_L8_2d_a_Series001.ims	S:\AG\AG-Endres\Daten\Gertz-Kronenberg\von Majed\IMARIS\Microfetti\Ki-67 quantification\Data\2d\KGE5193\20241102_KGE-5193_L8_2d_a_Series001.ims
367	µm	Surface	Position	10.2	µm	Surface	Position	10300	µm	Surface	Position	1	54	0	1	GFP	700002	6	GFP	700002	20241102_KGE-5193_L8_2d_a_Series001.ims	S:\AG\AG-Endres\Daten\Gertz-Kronenberg\von Majed\IMARIS\Microfetti\Ki-67 quantification\Data\2d\KGE5193\20241102_KGE-5193_L8_2d_a_Series001.ims
103	µm	Surface	Position	60.6	µm	Surface	Position	10300	µm	Surface	Position	0	55	0	1	GFP	700002	8	GFP	700002	20241102_KGE-5193_L8_2d_a_Series001.ims	S:\AG\AG-Endres\Daten\Gertz-Kronenberg\von Majed\IMARIS\Microfetti\Ki-67 quantification\Data\2d\KGE5193\20241102_KGE-5193_L8_2d_a_Series001.ims
220	µm	Surface	Position	228	µm	Surface	Position	10300	µm	Surface	Position	1	56	0	1	GFP	700002	0	GFP	700002	20241102_KGE-5193_L8_2d_b_Series003.ims	S:\AG\AG-Endres\Daten\Gertz-Kronenberg\von Majed\IMARIS\Microfetti\Ki-67 quantification\Data\2d\KGE5193\20241102_KGE-5193_L8_2d_b_Series003.ims
137	µm	Surface	Position	301	µm	Surface	Position	10300	µm	Surface	Position	1	57	0	1	GFP	700002	1	GFP	700002	20241102_KGE-5193_L8_2d_b_Series003.ims	S:\AG\AG-Endres\Daten\Gertz-Kronenberg\von Majed\IMARIS\Microfetti\Ki-67 quantification\Data\2d\KGE5193\20241102_KGE-5193_L8_2d_b_Series003.ims
142	µm	Surface	Position	250	µm	Surface	Position	10300	µm	Surface	Position	1	58	0	1	GFP	700002	3	GFP	700002	20241102_KGE-5193_L8_2d_b_Series003.ims	S:\AG\AG-Endres\Daten\Gertz-Kronenberg\von Majed\IMARIS\Microfetti\Ki-67 quantification\Data\2d\KGE5193\20241102_KGE-5193_L8_2d_b_Series003.ims
225	µm	Surface	Position	211	µm	Surface	Position	10300	µm	Surface	Position	1	59	0	1	GFP	700002	1	GFP	700002	20241102_KGE-5193_L8_2d_d_Series007.ims	S:\AG\AG-Endres\Daten\Gertz-Kronenberg\von Majed\IMARIS\Microfetti\Ki-67 quantification\Data\2d\KGE5193\20241102_KGE-5193_L8_2d_d_Series007.ims
218	µm	Surface	Position	250	µm	Surface	Position	10300	µm	Surface	Position	0	60	0	1	GFP	700002	2	GFP	700002	20241102_KGE-5193_L8_2d_d_Series007.ims	S:\AG\AG-Endres\Daten\Gertz-Kronenberg\von Majed\IMARIS\Microfetti\Ki-67 quantification\Data\2d\KGE5193\20241102_KGE-5193_L8_2d_d_Series007.ims
274	µm	Surface	Position	99.2	µm	Surface	Position	10300	µm	Surface	Position	1	61	0	1	GFP	700002	9	GFP	700002	20241102_KGE-5193_L8_2d_d_Series007.ims	S:\AG\AG-Endres\Daten\Gertz-Kronenberg\von Majed\IMARIS\Microfetti\Ki-67 quantification\Data\2d\KGE5193\20241102_KGE-5193_L8_2d_d_Series007.ims
150	µm	Surface	Position	173	µm	Surface	Position	10300	µm	Surface	Position	1	62	0	1	GFP	700002	11	GFP	700002	20241102_KGE-5193_L8_2d_d_Series007.ims	S:\AG\AG-Endres\Daten\Gertz-Kronenberg\von Majed\IMARIS\Microfetti\Ki-67 quantification\Data\2d\KGE5193\20241102_KGE-5193_L8_2d_d_Series007.ims
185	µm	Surface	Position	143	µm	Surface	Position	10300	µm	Surface	Position	1	63	0	1	GFP	700002	12	GFP	700002	20241102_KGE-5193_L8_2d_d_Series007.ims	S:\AG\AG-Endres\Daten\Gertz-Kronenberg\von Majed\IMARIS\Microfetti\Ki-67 quantification\Data\2d\KGE5193\20241102_KGE-5193_L8_2d_d_Series007.ims
341	µm	Surface	Position	69.8	µm	Surface	Position	10300	µm	Surface	Position	1	64	0	1	GFP	700002	1	GFP	700002	20241102_KGE-5193_L8_2d_e_Series009.ims	S:\AG\AG-Endres\Daten\Gertz-Kronenberg\von Majed\IMARIS\Microfetti\Ki-67 quantification\Data\2d\KGE5193\20241102_KGE-5193_L8_2d_e_Series009.ims
169	µm	Surface	Position	202	µm	Surface	Position	10300	µm	Surface	Position	0	65	0	1	GFP	700002	4	GFP	700002	20241102_KGE-5193_L8_2d_e_Series009.ims	S:\AG\AG-Endres\Daten\Gertz-Kronenberg\von Majed\IMARIS\Microfetti\Ki-67 quantification\Data\2d\KGE5193\20241102_KGE-5193_L8_2d_e_Series009.ims
227	µm	Surface	Position	39.5	µm	Surface	Position	10300	µm	Surface	Position	1	66	0	1	GFP	700002	7	GFP	700002	20241102_KGE-5193_L8_2d_e_Series009.ims	S:\AG\AG-Endres\Daten\Gertz-Kronenberg\von Majed\IMARIS\Microfetti\Ki-67 quantification\Data\2d\KGE5193\20241102_KGE-5193_L8_2d_e_Series009.ims
250	µm	Surface	Position	18.2	µm	Surface	Position	10300	µm	Surface	Position	1	67	0	1	GFP	700002	8	GFP	700002	20241102_KGE-5193_L8_2d_e_Series009.ims	S:\AG\AG-Endres\Daten\Gertz-Kronenberg\von Majed\IMARIS\Microfetti\Ki-67 quantification\Data\2d\KGE5193\20241102_KGE-5193_L8_2d_e_Series009.ims
79.8	µm	Surface	Position	141	µm	Surface	Position	10300	µm	Surface	Position	1	68	0	1	GFP	700002	9	GFP	700002	20241102_KGE-5193_L8_2d_e_Series009.ims	S:\AG\AG-Endres\Daten\Gertz-Kronenberg\von Majed\IMARIS\Microfetti\Ki-67 quantification\Data\2d\KGE5193\20241102_KGE-5193_L8_2d_e_Series009.ims
48.2	µm	Surface	Position	129	µm	Surface	Position	10300	µm	Surface	Position	1	69	0	1	GFP	700002	10	GFP	700002	20241102_KGE-5193_L8_2d_e_Series009.ims	S:\AG\AG-Endres\Daten\Gertz-Kronenberg\von Majed\IMARIS\Microfetti\Ki-67 quantification\Data\2d\KGE5193\20241102_KGE-5193_L8_2d_e_Series009.ims
41.9	µm	Surface	Position	126	µm	Surface	Position	10300	µm	Surface	Position	1	70	0	1	GFP	700002	11	GFP	700002	20241102_KGE-5193_L8_2d_e_Series009.ims	S:\AG\AG-Endres\Daten\Gertz-Kronenberg\von Majed\IMARIS\Microfetti\Ki-67 quantification\Data\2d\KGE5193\20241102_KGE-5193_L8_2d_e_Series009.ims
369	µm	Surface	Position	351	µm	Surface	Position	10500	µm	Surface	Position	1	71	0	1	GFP	700002	0	GFP	700002	20241103_KGE-5319_L9_2d_a_Series001.ims	S:\AG\AG-Endres\Daten\Gertz-Kronenberg\von Majed\IMARIS\Microfetti\Ki-67 quantification\Data\2d\KGE5319\20241103_KGE-5319_L9_2d_a_Series001.ims
190	µm	Surface	Position	269	µm	Surface	Position	10500	µm	Surface	Position	0	72	0	1	GFP	700002	4	GFP	700002	20241103_KGE-5319_L9_2d_a_Series001.ims	S:\AG\AG-Endres\Daten\Gertz-Kronenberg\von Majed\IMARIS\Microfetti\Ki-67 quantification\Data\2d\KGE5319\20241103_KGE-5319_L9_2d_a_Series001.ims
331	µm	Surface	Position	97.2	µm	Surface	Position	10400	µm	Surface	Position	0	73	0	1	GFP	700002	5	GFP	700002	20241103_KGE-5319_L9_2d_a_Series001.ims	S:\AG\AG-Endres\Daten\Gertz-Kronenberg\von Majed\IMARIS\Microfetti\Ki-67 quantification\Data\2d\KGE5319\20241103_KGE-5319_L9_2d_a_Series001.ims
218	µm	Surface	Position	170	µm	Surface	Position	10500	µm	Surface	Position	0	74	0	1	GFP	700002	6	GFP	700002	20241103_KGE-5319_L9_2d_a_Series001.ims	S:\AG\AG-Endres\Daten\Gertz-Kronenberg\von Majed\IMARIS\Microfetti\Ki-67 quantification\Data\2d\KGE5319\20241103_KGE-5319_L9_2d_a_Series001.ims
353	µm	Surface	Position	20.3	µm	Surface	Position	10500	µm	Surface	Position	0	75	0	1	GFP	700002	7	GFP	700002	20241103_KGE-5319_L9_2d_a_Series001.ims	S:\AG\AG-Endres\Daten\Gertz-Kronenberg\von Majed\IMARIS\Microfetti\Ki-67 quantification\Data\2d\KGE5319\20241103_KGE-5319_L9_2d_a_Series001.ims
239	µm	Surface	Position	74	µm	Surface	Position	10400	µm	Surface	Position	1	76	0	1	GFP	700002	8	GFP	700002	20241103_KGE-5319_L9_2d_a_Series001.ims	S:\AG\AG-Endres\Daten\Gertz-Kronenberg\von Majed\IMARIS\Microfetti\Ki-67 quantification\Data\2d\KGE5319\20241103_KGE-5319_L9_2d_a_Series001.ims
111	µm	Surface	Position	187	µm	Surface	Position	10400	µm	Surface	Position	0	77	0	1	GFP	700002	9	GFP	700002	20241103_KGE-5319_L9_2d_a_Series001.ims	S:\AG\AG-Endres\Daten\Gertz-Kronenberg\von Majed\IMARIS\Microfetti\Ki-67 quantification\Data\2d\KGE5319\20241103_KGE-5319_L9_2d_a_Series001.ims
323	µm	Surface	Position	133	µm	Surface	Position	10500	µm	Surface	Position	0	78	0	1	GFP	700002	5	GFP	700001	20241103_KGE-5319_L9_2d_b_Series003.ims	S:\AG\AG-Endres\Daten\Gertz-Kronenberg\von Majed\IMARIS\Microfetti\Ki-67 quantification\Data\2d\KGE5319\20241103_KGE-5319_L9_2d_b_Series003.ims
224	µm	Surface	Position	94	µm	Surface	Position	10500	µm	Surface	Position	0	79	0	1	GFP	700002	10	GFP	700001	20241103_KGE-5319_L9_2d_b_Series003.ims	S:\AG\AG-Endres\Daten\Gertz-Kronenberg\von Majed\IMARIS\Microfetti\Ki-67 quantification\Data\2d\KGE5319\20241103_KGE-5319_L9_2d_b_Series003.ims
233	µm	Surface	Position	42.1	µm	Surface	Position	10500	µm	Surface	Position	1	80	0	1	GFP	700002	17	GFP	700001	20241103_KGE-5319_L9_2d_b_Series003.ims	S:\AG\AG-Endres\Daten\Gertz-Kronenberg\von Majed\IMARIS\Microfetti\Ki-67 quantification\Data\2d\KGE5319\20241103_KGE-5319_L9_2d_b_Series003.ims
210	µm	Surface	Position	11.8	µm	Surface	Position	10500	µm	Surface	Position	1	81	0	1	GFP	700002	18	GFP	700001	20241103_KGE-5319_L9_2d_b_Series003.ims	S:\AG\AG-Endres\Daten\Gertz-Kronenberg\von Majed\IMARIS\Microfetti\Ki-67 quantification\Data\2d\KGE5319\20241103_KGE-5319_L9_2d_b_Series003.ims
120	µm	Surface	Position	199	µm	Surface	Position	10500	µm	Surface	Position	0	82	0	1	GFP	700002	14	GFP	700001	20241103_KGE-5319_L9_2d_c_Series005.ims	S:\AG\AG-Endres\Daten\Gertz-Kronenberg\von Majed\IMARIS\Microfetti\Ki-67 quantification\Data\2d\KGE5319\20241103_KGE-5319_L9_2d_c_Series005.ims
98.5	µm	Surface	Position	47.9	µm	Surface	Position	10500	µm	Surface	Position	0	83	0	1	GFP	700002	19	GFP	700001	20241103_KGE-5319_L9_2d_c_Series005.ims	S:\AG\AG-Endres\Daten\Gertz-Kronenberg\von Majed\IMARIS\Microfetti\Ki-67 quantification\Data\2d\KGE5319\20241103_KGE-5319_L9_2d_c_Series005.ims
307	µm	Surface	Position	305	µm	Surface	Position	10500	µm	Surface	Position	0	84	0	1	GFP	700002	0	GFP	700002	20241103_KGE-5319_L9_2d_d_Series007.ims	S:\AG\AG-Endres\Daten\Gertz-Kronenberg\von Majed\IMARIS\Microfetti\Ki-67 quantification\Data\2d\KGE5319\20241103_KGE-5319_L9_2d_d_Series007.ims
232	µm	Surface	Position	348	µm	Surface	Position	10500	µm	Surface	Position	0	85	0	1	GFP	700002	1	GFP	700002	20241103_KGE-5319_L9_2d_d_Series007.ims	S:\AG\AG-Endres\Daten\Gertz-Kronenberg\von Majed\IMARIS\Microfetti\Ki-67 quantification\Data\2d\KGE5319\20241103_KGE-5319_L9_2d_d_Series007.ims
197	µm	Surface	Position	68.9	µm	Surface	Position	10500	µm	Surface	Position	0	86	0	1	GFP	700002	3	GFP	700002	20241103_KGE-5319_L9_2d_d_Series007.ims	S:\AG\AG-Endres\Daten\Gertz-Kronenberg\von Majed\IMARIS\Microfetti\Ki-67 quantification\Data\2d\KGE5319\20241103_KGE-5319_L9_2d_d_Series007.ims
227	µm	Surface	Position	9.11	µm	Surface	Position	10400	µm	Surface	Position	0	87	0	1	GFP	700002	4	GFP	700002	20241103_KGE-5319_L9_2d_d_Series007.ims	S:\AG\AG-Endres\Daten\Gertz-Kronenberg\von Majed\IMARIS\Microfetti\Ki-67 quantification\Data\2d\KGE5319\20241103_KGE-5319_L9_2d_d_Series007.ims
68.3	µm	Surface	Position	27.6	µm	Surface	Position	10400	µm	Surface	Position	0	88	0	1	GFP	700002	5	GFP	700002	20241103_KGE-5319_L9_2d_d_Series007.ims	S:\AG\AG-Endres\Daten\Gertz-Kronenberg\von Majed\IMARIS\Microfetti\Ki-67 quantification\Data\2d\KGE5319\20241103_KGE-5319_L9_2d_d_Series007.ims
228	µm	Surface	Position	191	µm	Surface	Position	10500	µm	Surface	Position	1	89	0	1	GFP	700002	0	GFP	700002	20241103_KGE-5319_L9_2d_e_Series009.ims	S:\AG\AG-Endres\Daten\Gertz-Kronenberg\von Majed\IMARIS\Microfetti\Ki-67 quantification\Data\2d\KGE5319\20241103_KGE-5319_L9_2d_e_Series009.ims
280	µm	Surface	Position	121	µm	Surface	Position	10500	µm	Surface	Position	1	90	0	1	GFP	700002	2	GFP	700002	20241103_KGE-5319_L9_2d_e_Series009.ims	S:\AG\AG-Endres\Daten\Gertz-Kronenberg\von Majed\IMARIS\Microfetti\Ki-67 quantification\Data\2d\KGE5319\20241103_KGE-5319_L9_2d_e_Series009.ims
116	µm	Surface	Position	254	µm	Surface	Position	10500	µm	Surface	Position	1	91	0	1	GFP	700002	3	GFP	700002	20241103_KGE-5319_L9_2d_e_Series009.ims	S:\AG\AG-Endres\Daten\Gertz-Kronenberg\von Majed\IMARIS\Microfetti\Ki-67 quantification\Data\2d\KGE5319\20241103_KGE-5319_L9_2d_e_Series009.ims
161	µm	Surface	Position	195	µm	Surface	Position	10500	µm	Surface	Position	0	92	0	1	GFP	700002	4	GFP	700002	20241103_KGE-5319_L9_2d_e_Series009.ims	S:\AG\AG-Endres\Daten\Gertz-Kronenberg\von Majed\IMARIS\Microfetti\Ki-67 quantification\Data\2d\KGE5319\20241103_KGE-5319_L9_2d_e_Series009.ims
128	µm	Surface	Position	129	µm	Surface	Position	10500	µm	Surface	Position	1	93	0	1	GFP	700002	7	GFP	700002	20241103_KGE-5319_L9_2d_e_Series009.ims	S:\AG\AG-Endres\Daten\Gertz-Kronenberg\von Majed\IMARIS\Microfetti\Ki-67 quantification\Data\2d\KGE5319\20241103_KGE-5319_L9_2d_e_Series009.ims
161	µm	Surface	Position	76.2	µm	Surface	Position	10500	µm	Surface	Position	1	94	0	1	GFP	700002	8	GFP	700002	20241103_KGE-5319_L9_2d_e_Series009.ims	S:\AG\AG-Endres\Daten\Gertz-Kronenberg\von Majed\IMARIS\Microfetti\Ki-67 quantification\Data\2d\KGE5319\20241103_KGE-5319_L9_2d_e_Series009.ims
155	µm	Surface	Position	75.3	µm	Surface	Position	10500	µm	Surface	Position	1	95	0	1	GFP	700002	9	GFP	700002	20241103_KGE-5319_L9_2d_e_Series009.ims	S:\AG\AG-Endres\Daten\Gertz-Kronenberg\von Majed\IMARIS\Microfetti\Ki-67 quantification\Data\2d\KGE5319\20241103_KGE-5319_L9_2d_e_Series009.ims
248	µm	Surface	Position	171	µm	Surface	Position	10400	µm	Surface	Position	1	96	0	1	GFP	700002	4	GFP	700002	20241103_KGE-5320_L9_2d_a_Series001.ims	S:\AG\AG-Endres\Daten\Gertz-Kronenberg\von Majed\IMARIS\Microfetti\Ki-67 quantification\Data\2d\KGE5320\20241103_KGE-5320_L9_2d_a_Series001.ims
195	µm	Surface	Position	207	µm	Surface	Position	10400	µm	Surface	Position	0	97	0	1	GFP	700002	6	GFP	700002	20241103_KGE-5320_L9_2d_a_Series001.ims	S:\AG\AG-Endres\Daten\Gertz-Kronenberg\von Majed\IMARIS\Microfetti\Ki-67 quantification\Data\2d\KGE5320\20241103_KGE-5320_L9_2d_a_Series001.ims
320	µm	Surface	Position	268	µm	Surface	Position	10400	µm	Surface	Position	0	98	0	1	GFP	700002	0	GFP	700001	20241103_KGE-5320_L9_2d_b_Series004.ims	S:\AG\AG-Endres\Daten\Gertz-Kronenberg\von Majed\IMARIS\Microfetti\Ki-67 quantification\Data\2d\KGE5320\20241103_KGE-5320_L9_2d_b_Series004.ims
286	µm	Surface	Position	294	µm	Surface	Position	10400	µm	Surface	Position	0	99	0	1	GFP	700002	1	GFP	700001	20241103_KGE-5320_L9_2d_b_Series004.ims	S:\AG\AG-Endres\Daten\Gertz-Kronenberg\von Majed\IMARIS\Microfetti\Ki-67 quantification\Data\2d\KGE5320\20241103_KGE-5320_L9_2d_b_Series004.ims
207	µm	Surface	Position	310	µm	Surface	Position	10400	µm	Surface	Position	1	100	0	1	GFP	700002	2	GFP	700001	20241103_KGE-5320_L9_2d_b_Series004.ims	S:\AG\AG-Endres\Daten\Gertz-Kronenberg\von Majed\IMARIS\Microfetti\Ki-67 quantification\Data\2d\KGE5320\20241103_KGE-5320_L9_2d_b_Series004.ims
208	µm	Surface	Position	116	µm	Surface	Position	10400	µm	Surface	Position	0	101	0	1	GFP	700002	5	GFP	700001	20241103_KGE-5320_L9_2d_b_Series004.ims	S:\AG\AG-Endres\Daten\Gertz-Kronenberg\von Majed\IMARIS\Microfetti\Ki-67 quantification\Data\2d\KGE5320\20241103_KGE-5320_L9_2d_b_Series004.ims
234	µm	Surface	Position	49.1	µm	Surface	Position	10400	µm	Surface	Position	0	102	0	1	GFP	700002	6	GFP	700001	20241103_KGE-5320_L9_2d_b_Series004.ims	S:\AG\AG-Endres\Daten\Gertz-Kronenberg\von Majed\IMARIS\Microfetti\Ki-67 quantification\Data\2d\KGE5320\20241103_KGE-5320_L9_2d_b_Series004.ims
7.55	µm	Surface	Position	212	µm	Surface	Position	10400	µm	Surface	Position	0	103	0	1	GFP	700002	7	GFP	700001	20241103_KGE-5320_L9_2d_b_Series004.ims	S:\AG\AG-Endres\Daten\Gertz-Kronenberg\von Majed\IMARIS\Microfetti\Ki-67 quantification\Data\2d\KGE5320\20241103_KGE-5320_L9_2d_b_Series004.ims
65.4	µm	Surface	Position	141	µm	Surface	Position	10400	µm	Surface	Position	0	104	0	1	GFP	700002	8	GFP	700001	20241103_KGE-5320_L9_2d_b_Series004.ims	S:\AG\AG-Endres\Daten\Gertz-Kronenberg\von Majed\IMARIS\Microfetti\Ki-67 quantification\Data\2d\KGE5320\20241103_KGE-5320_L9_2d_b_Series004.ims
291	µm	Surface	Position	48.4	µm	Surface	Position	10400	µm	Surface	Position	0	105	0	1	GFP	700002	0	GFP	700002	20241103_KGE-5320_L9_2d_c_Series006.ims	S:\AG\AG-Endres\Daten\Gertz-Kronenberg\von Majed\IMARIS\Microfetti\Ki-67 quantification\Data\2d\KGE5320\20241103_KGE-5320_L9_2d_c_Series006.ims
165	µm	Surface	Position	10.4	µm	Surface	Position	10400	µm	Surface	Position	0	106	0	1	GFP	700002	2	GFP	700002	20241103_KGE-5320_L9_2d_c_Series006.ims	S:\AG\AG-Endres\Daten\Gertz-Kronenberg\von Majed\IMARIS\Microfetti\Ki-67 quantification\Data\2d\KGE5320\20241103_KGE-5320_L9_2d_c_Series006.ims
215	µm	Surface	Position	222	µm	Surface	Position	10400	µm	Surface	Position	0	107	0	1	GFP	700002	0	GFP	700001	20241103_KGE-5320_L9_2d_d_Series008.ims	S:\AG\AG-Endres\Daten\Gertz-Kronenberg\von Majed\IMARIS\Microfetti\Ki-67 quantification\Data\2d\KGE5320\20241103_KGE-5320_L9_2d_d_Series008.ims
215	µm	Surface	Position	79.9	µm	Surface	Position	10400	µm	Surface	Position	0	108	0	1	GFP	700002	1	GFP	700001	20241103_KGE-5320_L9_2d_d_Series008.ims	S:\AG\AG-Endres\Daten\Gertz-Kronenberg\von Majed\IMARIS\Microfetti\Ki-67 quantification\Data\2d\KGE5320\20241103_KGE-5320_L9_2d_d_Series008.ims
81.3	µm	Surface	Position	189	µm	Surface	Position	10400	µm	Surface	Position	1	109	0	1	GFP	700002	2	GFP	700001	20241103_KGE-5320_L9_2d_d_Series008.ims	S:\AG\AG-Endres\Daten\Gertz-Kronenberg\von Majed\IMARIS\Microfetti\Ki-67 quantification\Data\2d\KGE5320\20241103_KGE-5320_L9_2d_d_Series008.ims
111	µm	Surface	Position	236	µm	Surface	Position	10400	µm	Surface	Position	0	110	0	1	GFP	700002	4	GFP	700001	20241103_KGE-5320_L9_2d_e_Series010.ims	S:\AG\AG-Endres\Daten\Gertz-Kronenberg\von Majed\IMARIS\Microfetti\Ki-67 quantification\Data\2d\KGE5320\20241103_KGE-5320_L9_2d_e_Series010.ims
343	µm	Surface	Position	77	µm	Surface	Position	10400	µm	Surface	Position	0	111	0	1	GFP	700002	8	GFP	700002	20241102_KGE-5321_L9_2d_a_Series001.ims	S:\AG\AG-Endres\Daten\Gertz-Kronenberg\von Majed\IMARIS\Microfetti\Ki-67 quantification\Data\2d\KGE5321\20241102_KGE-5321_L9_2d_a_Series001.ims
177	µm	Surface	Position	122	µm	Surface	Position	10400	µm	Surface	Position	0	112	0	1	GFP	700002	12	GFP	700002	20241102_KGE-5321_L9_2d_a_Series001.ims	S:\AG\AG-Endres\Daten\Gertz-Kronenberg\von Majed\IMARIS\Microfetti\Ki-67 quantification\Data\2d\KGE5321\20241102_KGE-5321_L9_2d_a_Series001.ims
230	µm	Surface	Position	21.9	µm	Surface	Position	10400	µm	Surface	Position	1	113	0	1	GFP	700002	16	GFP	700002	20241102_KGE-5321_L9_2d_a_Series001.ims	S:\AG\AG-Endres\Daten\Gertz-Kronenberg\von Majed\IMARIS\Microfetti\Ki-67 quantification\Data\2d\KGE5321\20241102_KGE-5321_L9_2d_a_Series001.ims
170	µm	Surface	Position	48.2	µm	Surface	Position	10400	µm	Surface	Position	0	114	0	1	GFP	700002	17	GFP	700002	20241102_KGE-5321_L9_2d_a_Series001.ims	S:\AG\AG-Endres\Daten\Gertz-Kronenberg\von Majed\IMARIS\Microfetti\Ki-67 quantification\Data\2d\KGE5321\20241102_KGE-5321_L9_2d_a_Series001.ims
266	µm	Surface	Position	349	µm	Surface	Position	10400	µm	Surface	Position	0	115	0	1	GFP	700002	0	GFP	700002	20241102_KGE-5321_L9_2d_b_Series003.ims	S:\AG\AG-Endres\Daten\Gertz-Kronenberg\von Majed\IMARIS\Microfetti\Ki-67 quantification\Data\2d\KGE5321\20241102_KGE-5321_L9_2d_b_Series003.ims
284	µm	Surface	Position	179	µm	Surface	Position	10400	µm	Surface	Position	0	116	0	1	GFP	700002	2	GFP	700002	20241102_KGE-5321_L9_2d_b_Series003.ims	S:\AG\AG-Endres\Daten\Gertz-Kronenberg\von Majed\IMARIS\Microfetti\Ki-67 quantification\Data\2d\KGE5321\20241102_KGE-5321_L9_2d_b_Series003.ims
300	µm	Surface	Position	90.6	µm	Surface	Position	10400	µm	Surface	Position	1	117	0	1	GFP	700002	3	GFP	700002	20241102_KGE-5321_L9_2d_b_Series003.ims	S:\AG\AG-Endres\Daten\Gertz-Kronenberg\von Majed\IMARIS\Microfetti\Ki-67 quantification\Data\2d\KGE5321\20241102_KGE-5321_L9_2d_b_Series003.ims
130	µm	Surface	Position	188	µm	Surface	Position	10400	µm	Surface	Position	0	118	0	1	GFP	700002	4	GFP	700002	20241102_KGE-5321_L9_2d_b_Series003.ims	S:\AG\AG-Endres\Daten\Gertz-Kronenberg\von Majed\IMARIS\Microfetti\Ki-67 quantification\Data\2d\KGE5321\20241102_KGE-5321_L9_2d_b_Series003.ims
96.9	µm	Surface	Position	75.3	µm	Surface	Position	10400	µm	Surface	Position	0	119	0	1	GFP	700002	8	GFP	700002	20241102_KGE-5321_L9_2d_b_Series003.ims	S:\AG\AG-Endres\Daten\Gertz-Kronenberg\von Majed\IMARIS\Microfetti\Ki-67 quantification\Data\2d\KGE5321\20241102_KGE-5321_L9_2d_b_Series003.ims
325	µm	Surface	Position	265	µm	Surface	Position	10400	µm	Surface	Position	0	120	0	1	GFP	700002	1	GFP	700002	20241102_KGE-5321_L9_2d_c_Series005.ims	S:\AG\AG-Endres\Daten\Gertz-Kronenberg\von Majed\IMARIS\Microfetti\Ki-67 quantification\Data\2d\KGE5321\20241102_KGE-5321_L9_2d_c_Series005.ims
266	µm	Surface	Position	224	µm	Surface	Position	10400	µm	Surface	Position	0	121	0	1	GFP	700002	4	GFP	700002	20241102_KGE-5321_L9_2d_c_Series005.ims	S:\AG\AG-Endres\Daten\Gertz-Kronenberg\von Majed\IMARIS\Microfetti\Ki-67 quantification\Data\2d\KGE5321\20241102_KGE-5321_L9_2d_c_Series005.ims
304	µm	Surface	Position	198	µm	Surface	Position	10400	µm	Surface	Position	0	122	0	1	GFP	700002	5	GFP	700002	20241102_KGE-5321_L9_2d_c_Series005.ims	S:\AG\AG-Endres\Daten\Gertz-Kronenberg\von Majed\IMARIS\Microfetti\Ki-67 quantification\Data\2d\KGE5321\20241102_KGE-5321_L9_2d_c_Series005.ims
336	µm	Surface	Position	63	µm	Surface	Position	10400	µm	Surface	Position	0	123	0	1	GFP	700002	8	GFP	700002	20241102_KGE-5321_L9_2d_c_Series005.ims	S:\AG\AG-Endres\Daten\Gertz-Kronenberg\von Majed\IMARIS\Microfetti\Ki-67 quantification\Data\2d\KGE5321\20241102_KGE-5321_L9_2d_c_Series005.ims
318	µm	Surface	Position	79.3	µm	Surface	Position	10400	µm	Surface	Position	0	124	0	1	GFP	700002	9	GFP	700002	20241102_KGE-5321_L9_2d_c_Series005.ims	S:\AG\AG-Endres\Daten\Gertz-Kronenberg\von Majed\IMARIS\Microfetti\Ki-67 quantification\Data\2d\KGE5321\20241102_KGE-5321_L9_2d_c_Series005.ims
105	µm	Surface	Position	237	µm	Surface	Position	10400	µm	Surface	Position	0	125	0	1	GFP	700002	13	GFP	700002	20241102_KGE-5321_L9_2d_c_Series005.ims	S:\AG\AG-Endres\Daten\Gertz-Kronenberg\von Majed\IMARIS\Microfetti\Ki-67 quantification\Data\2d\KGE5321\20241102_KGE-5321_L9_2d_c_Series005.ims
223	µm	Surface	Position	51.6	µm	Surface	Position	10400	µm	Surface	Position	0	126	0	1	GFP	700002	14	GFP	700002	20241102_KGE-5321_L9_2d_c_Series005.ims	S:\AG\AG-Endres\Daten\Gertz-Kronenberg\von Majed\IMARIS\Microfetti\Ki-67 quantification\Data\2d\KGE5321\20241102_KGE-5321_L9_2d_c_Series005.ims
66.4	µm	Surface	Position	171	µm	Surface	Position	10400	µm	Surface	Position	0	127	0	1	GFP	700002	16	GFP	700002	20241102_KGE-5321_L9_2d_c_Series005.ims	S:\AG\AG-Endres\Daten\Gertz-Kronenberg\von Majed\IMARIS\Microfetti\Ki-67 quantification\Data\2d\KGE5321\20241102_KGE-5321_L9_2d_c_Series005.ims
266	µm	Surface	Position	301	µm	Surface	Position	10400	µm	Surface	Position	0	128	0	1	GFP	700002	4	GFP	700002	20241102_KGE-5321_L9_2d_d_Series007.ims	S:\AG\AG-Endres\Daten\Gertz-Kronenberg\von Majed\IMARIS\Microfetti\Ki-67 quantification\Data\2d\KGE5321\20241102_KGE-5321_L9_2d_d_Series007.ims
181	µm	Surface	Position	296	µm	Surface	Position	10400	µm	Surface	Position	0	129	0	1	GFP	700002	6	GFP	700002	20241102_KGE-5321_L9_2d_d_Series007.ims	S:\AG\AG-Endres\Daten\Gertz-Kronenberg\von Majed\IMARIS\Microfetti\Ki-67 quantification\Data\2d\KGE5321\20241102_KGE-5321_L9_2d_d_Series007.ims
145	µm	Surface	Position	310	µm	Surface	Position	10400	µm	Surface	Position	0	130	0	1	GFP	700002	7	GFP	700002	20241102_KGE-5321_L9_2d_d_Series007.ims	S:\AG\AG-Endres\Daten\Gertz-Kronenberg\von Majed\IMARIS\Microfetti\Ki-67 quantification\Data\2d\KGE5321\20241102_KGE-5321_L9_2d_d_Series007.ims
313	µm	Surface	Position	106	µm	Surface	Position	10400	µm	Surface	Position	0	131	0	1	GFP	700002	10	GFP	700002	20241102_KGE-5321_L9_2d_d_Series007.ims	S:\AG\AG-Endres\Daten\Gertz-Kronenberg\von Majed\IMARIS\Microfetti\Ki-67 quantification\Data\2d\KGE5321\20241102_KGE-5321_L9_2d_d_Series007.ims
114	µm	Surface	Position	258	µm	Surface	Position	10400	µm	Surface	Position	0	132	0	1	GFP	700002	12	GFP	700002	20241102_KGE-5321_L9_2d_d_Series007.ims	S:\AG\AG-Endres\Daten\Gertz-Kronenberg\von Majed\IMARIS\Microfetti\Ki-67 quantification\Data\2d\KGE5321\20241102_KGE-5321_L9_2d_d_Series007.ims
136	µm	Surface	Position	84.8	µm	Surface	Position	10400	µm	Surface	Position	0	133	0	1	GFP	700002	15	GFP	700002	20241102_KGE-5321_L9_2d_d_Series007.ims	S:\AG\AG-Endres\Daten\Gertz-Kronenberg\von Majed\IMARIS\Microfetti\Ki-67 quantification\Data\2d\KGE5321\20241102_KGE-5321_L9_2d_d_Series007.ims
2.02	µm	Surface	Position	192	µm	Surface	Position	10400	µm	Surface	Position	0	134	0	1	GFP	700002	17	GFP	700002	20241102_KGE-5321_L9_2d_d_Series007.ims	S:\AG\AG-Endres\Daten\Gertz-Kronenberg\von Majed\IMARIS\Microfetti\Ki-67 quantification\Data\2d\KGE5321\20241102_KGE-5321_L9_2d_d_Series007.ims
303	µm	Surface	Position	136	µm	Surface	Position	10400	µm	Surface	Position	0	135	0	1	GFP	700002	5	GFP	700002	20241102_KGE-5321_L9_2d_e_Series009.ims	S:\AG\AG-Endres\Daten\Gertz-Kronenberg\von Majed\IMARIS\Microfetti\Ki-67 quantification\Data\2d\KGE5321\20241102_KGE-5321_L9_2d_e_Series009.ims
245	µm	Surface	Position	104	µm	Surface	Position	10400	µm	Surface	Position	0	136	0	1	GFP	700002	10	GFP	700002	20241102_KGE-5321_L9_2d_e_Series009.ims	S:\AG\AG-Endres\Daten\Gertz-Kronenberg\von Majed\IMARIS\Microfetti\Ki-67 quantification\Data\2d\KGE5321\20241102_KGE-5321_L9_2d_e_Series009.ims
99.2	µm	Surface	Position	251	µm	Surface	Position	10400	µm	Surface	Position	0	137	0	1	GFP	700002	11	GFP	700002	20241102_KGE-5321_L9_2d_e_Series009.ims	S:\AG\AG-Endres\Daten\Gertz-Kronenberg\von Majed\IMARIS\Microfetti\Ki-67 quantification\Data\2d\KGE5321\20241102_KGE-5321_L9_2d_e_Series009.ims
88.2	µm	Surface	Position	98.4	µm	Surface	Position	10400	µm	Surface	Position	0	138	0	1	GFP	700002	19	GFP	700002	20241102_KGE-5321_L9_2d_e_Series009.ims	S:\AG\AG-Endres\Daten\Gertz-Kronenberg\von Majed\IMARIS\Microfetti\Ki-67 quantification\Data\2d\KGE5321\20241102_KGE-5321_L9_2d_e_Series009.ims
196	µm	Surface	Position	1.95	µm	Surface	Position	10400	µm	Surface	Position	1	139	0	1	GFP	700002	21	GFP	700002	20241102_KGE-5321_L9_2d_e_Series009.ims	S:\AG\AG-Endres\Daten\Gertz-Kronenberg\von Majed\IMARIS\Microfetti\Ki-67 quantification\Data\2d\KGE5321\20241102_KGE-5321_L9_2d_e_Series009.ims
89.6	µm	Surface	Position	59	µm	Surface	Position	10400	µm	Surface	Position	0	140	0	1	GFP	700002	23	GFP	700002	20241102_KGE-5321_L9_2d_e_Series009.ims	S:\AG\AG-Endres\Daten\Gertz-Kronenberg\von Majed\IMARIS\Microfetti\Ki-67 quantification\Data\2d\KGE5321\20241102_KGE-5321_L9_2d_e_Series009.ims
351	µm	Surface	Position	323	µm	Surface	Position	10400	µm	Surface	Position	0	0	0	1	RFP	700003	0	RFP	700004	20241103_KGE-4460_L6_2d_a_Series001.ims	S:\AG\AG-Endres\Daten\Gertz-Kronenberg\von Majed\IMARIS\Microfetti\Ki-67 quantification\Data\2d\KGE4460\20241103_KGE-4460_L6_2d_a_Series001.ims
252	µm	Surface	Position	330	µm	Surface	Position	10400	µm	Surface	Position	1	1	0	1	RFP	700003	1	RFP	700004	20241103_KGE-4460_L6_2d_a_Series001.ims	S:\AG\AG-Endres\Daten\Gertz-Kronenberg\von Majed\IMARIS\Microfetti\Ki-67 quantification\Data\2d\KGE4460\20241103_KGE-4460_L6_2d_a_Series001.ims
159	µm	Surface	Position	338	µm	Surface	Position	10400	µm	Surface	Position	0	2	0	1	RFP	700003	2	RFP	700004	20241103_KGE-4460_L6_2d_a_Series001.ims	S:\AG\AG-Endres\Daten\Gertz-Kronenberg\von Majed\IMARIS\Microfetti\Ki-67 quantification\Data\2d\KGE4460\20241103_KGE-4460_L6_2d_a_Series001.ims
205	µm	Surface	Position	237	µm	Surface	Position	10400	µm	Surface	Position	1	5	0	1	RFP	700003	5	RFP	700004	20241103_KGE-4460_L6_2d_a_Series001.ims	S:\AG\AG-Endres\Daten\Gertz-Kronenberg\von Majed\IMARIS\Microfetti\Ki-67 quantification\Data\2d\KGE4460\20241103_KGE-4460_L6_2d_a_Series001.ims
89.4	µm	Surface	Position	304	µm	Surface	Position	10400	µm	Surface	Position	1	9	0	1	RFP	700003	9	RFP	700004	20241103_KGE-4460_L6_2d_a_Series001.ims	S:\AG\AG-Endres\Daten\Gertz-Kronenberg\von Majed\IMARIS\Microfetti\Ki-67 quantification\Data\2d\KGE4460\20241103_KGE-4460_L6_2d_a_Series001.ims
102	µm	Surface	Position	262	µm	Surface	Position	10400	µm	Surface	Position	1	11	0	1	RFP	700003	11	RFP	700004	20241103_KGE-4460_L6_2d_a_Series001.ims	S:\AG\AG-Endres\Daten\Gertz-Kronenberg\von Majed\IMARIS\Microfetti\Ki-67 quantification\Data\2d\KGE4460\20241103_KGE-4460_L6_2d_a_Series001.ims
92.6	µm	Surface	Position	260	µm	Surface	Position	10400	µm	Surface	Position	1	12	0	1	RFP	700003	12	RFP	700004	20241103_KGE-4460_L6_2d_a_Series001.ims	S:\AG\AG-Endres\Daten\Gertz-Kronenberg\von Majed\IMARIS\Microfetti\Ki-67 quantification\Data\2d\KGE4460\20241103_KGE-4460_L6_2d_a_Series001.ims
216	µm	Surface	Position	98.2	µm	Surface	Position	10400	µm	Surface	Position	1	13	0	1	RFP	700003	13	RFP	700004	20241103_KGE-4460_L6_2d_a_Series001.ims	S:\AG\AG-Endres\Daten\Gertz-Kronenberg\von Majed\IMARIS\Microfetti\Ki-67 quantification\Data\2d\KGE4460\20241103_KGE-4460_L6_2d_a_Series001.ims
259	µm	Surface	Position	73.4	µm	Surface	Position	10400	µm	Surface	Position	1	14	0	1	RFP	700003	14	RFP	700004	20241103_KGE-4460_L6_2d_a_Series001.ims	S:\AG\AG-Endres\Daten\Gertz-Kronenberg\von Majed\IMARIS\Microfetti\Ki-67 quantification\Data\2d\KGE4460\20241103_KGE-4460_L6_2d_a_Series001.ims
190	µm	Surface	Position	142	µm	Surface	Position	10400	µm	Surface	Position	1	15	0	1	RFP	700003	15	RFP	700004	20241103_KGE-4460_L6_2d_a_Series001.ims	S:\AG\AG-Endres\Daten\Gertz-Kronenberg\von Majed\IMARIS\Microfetti\Ki-67 quantification\Data\2d\KGE4460\20241103_KGE-4460_L6_2d_a_Series001.ims
113	µm	Surface	Position	73.8	µm	Surface	Position	10400	µm	Surface	Position	1	17	0	1	RFP	700003	17	RFP	700004	20241103_KGE-4460_L6_2d_a_Series001.ims	S:\AG\AG-Endres\Daten\Gertz-Kronenberg\von Majed\IMARIS\Microfetti\Ki-67 quantification\Data\2d\KGE4460\20241103_KGE-4460_L6_2d_a_Series001.ims
13	µm	Surface	Position	99.2	µm	Surface	Position	10400	µm	Surface	Position	1	18	0	1	RFP	700003	18	RFP	700004	20241103_KGE-4460_L6_2d_a_Series001.ims	S:\AG\AG-Endres\Daten\Gertz-Kronenberg\von Majed\IMARIS\Microfetti\Ki-67 quantification\Data\2d\KGE4460\20241103_KGE-4460_L6_2d_a_Series001.ims
177	µm	Surface	Position	336	µm	Surface	Position	10400	µm	Surface	Position	1	19	0	1	RFP	700003	0	RFP	700004	20241103_KGE-4460_L6_2d_b_Series003.ims	S:\AG\AG-Endres\Daten\Gertz-Kronenberg\von Majed\IMARIS\Microfetti\Ki-67 quantification\Data\2d\KGE4460\20241103_KGE-4460_L6_2d_b_Series003.ims
168	µm	Surface	Position	221	µm	Surface	Position	10400	µm	Surface	Position	1	20	0	1	RFP	700003	1	RFP	700004	20241103_KGE-4460_L6_2d_b_Series003.ims	S:\AG\AG-Endres\Daten\Gertz-Kronenberg\von Majed\IMARIS\Microfetti\Ki-67 quantification\Data\2d\KGE4460\20241103_KGE-4460_L6_2d_b_Series003.ims
142	µm	Surface	Position	212	µm	Surface	Position	10400	µm	Surface	Position	1	21	0	1	RFP	700003	2	RFP	700004	20241103_KGE-4460_L6_2d_b_Series003.ims	S:\AG\AG-Endres\Daten\Gertz-Kronenberg\von Majed\IMARIS\Microfetti\Ki-67 quantification\Data\2d\KGE4460\20241103_KGE-4460_L6_2d_b_Series003.ims
164	µm	Surface	Position	286	µm	Surface	Position	10400	µm	Surface	Position	0	22	0	1	RFP	700003	0	RFP	700001	20241103_KGE-4460_L6_2d_c_Series005.ims	S:\AG\AG-Endres\Daten\Gertz-Kronenberg\von Majed\IMARIS\Microfetti\Ki-67 quantification\Data\2d\KGE4460\20241103_KGE-4460_L6_2d_c_Series005.ims
330	µm	Surface	Position	89	µm	Surface	Position	10400	µm	Surface	Position	0	23	0	1	RFP	700003	2	RFP	700001	20241103_KGE-4460_L6_2d_c_Series005.ims	S:\AG\AG-Endres\Daten\Gertz-Kronenberg\von Majed\IMARIS\Microfetti\Ki-67 quantification\Data\2d\KGE4460\20241103_KGE-4460_L6_2d_c_Series005.ims
91.5	µm	Surface	Position	238	µm	Surface	Position	10400	µm	Surface	Position	0	24	0	1	RFP	700003	3	RFP	700001	20241103_KGE-4460_L6_2d_c_Series005.ims	S:\AG\AG-Endres\Daten\Gertz-Kronenberg\von Majed\IMARIS\Microfetti\Ki-67 quantification\Data\2d\KGE4460\20241103_KGE-4460_L6_2d_c_Series005.ims
5.18	µm	Surface	Position	94.8	µm	Surface	Position	10400	µm	Surface	Position	0	25	0	1	RFP	700003	4	RFP	700001	20241103_KGE-4460_L6_2d_c_Series005.ims	S:\AG\AG-Endres\Daten\Gertz-Kronenberg\von Majed\IMARIS\Microfetti\Ki-67 quantification\Data\2d\KGE4460\20241103_KGE-4460_L6_2d_c_Series005.ims
94.3	µm	Surface	Position	286	µm	Surface	Position	10400	µm	Surface	Position	1	26	0	1	RFP	700003	0	RFP	700004	20241103_KGE-4460_L6_2d_d_Series007.ims	S:\AG\AG-Endres\Daten\Gertz-Kronenberg\von Majed\IMARIS\Microfetti\Ki-67 quantification\Data\2d\KGE4460\20241103_KGE-4460_L6_2d_d_Series007.ims
317	µm	Surface	Position	21.8	µm	Surface	Position	10400	µm	Surface	Position	0	27	0	1	RFP	700003	1	RFP	700004	20241103_KGE-4460_L6_2d_d_Series007.ims	S:\AG\AG-Endres\Daten\Gertz-Kronenberg\von Majed\IMARIS\Microfetti\Ki-67 quantification\Data\2d\KGE4460\20241103_KGE-4460_L6_2d_d_Series007.ims
230	µm	Surface	Position	50.9	µm	Surface	Position	10400	µm	Surface	Position	0	28	0	1	RFP	700003	2	RFP	700004	20241103_KGE-4460_L6_2d_d_Series007.ims	S:\AG\AG-Endres\Daten\Gertz-Kronenberg\von Majed\IMARIS\Microfetti\Ki-67 quantification\Data\2d\KGE4460\20241103_KGE-4460_L6_2d_d_Series007.ims
167	µm	Surface	Position	322	µm	Surface	Position	10400	µm	Surface	Position	0	29	0	1	RFP	700003	0	RFP	700001	20241103_KGE-4460_L6_2d_e_Series009.ims	S:\AG\AG-Endres\Daten\Gertz-Kronenberg\von Majed\IMARIS\Microfetti\Ki-67 quantification\Data\2d\KGE4460\20241103_KGE-4460_L6_2d_e_Series009.ims
182	µm	Surface	Position	321	µm	Surface	Position	10400	µm	Surface	Position	1	30	0	1	RFP	700003	1	RFP	700001	20241103_KGE-4460_L6_2d_e_Series009.ims	S:\AG\AG-Endres\Daten\Gertz-Kronenberg\von Majed\IMARIS\Microfetti\Ki-67 quantification\Data\2d\KGE4460\20241103_KGE-4460_L6_2d_e_Series009.ims
330	µm	Surface	Position	125	µm	Surface	Position	10400	µm	Surface	Position	1	31	0	1	RFP	700003	2	RFP	700001	20241103_KGE-4460_L6_2d_e_Series009.ims	S:\AG\AG-Endres\Daten\Gertz-Kronenberg\von Majed\IMARIS\Microfetti\Ki-67 quantification\Data\2d\KGE4460\20241103_KGE-4460_L6_2d_e_Series009.ims
103	µm	Surface	Position	321	µm	Surface	Position	10500	µm	Surface	Position	1	32	0	1	RFP	700003	3	RFP	700001	20241103_KGE-4460_L6_2d_e_Series009.ims	S:\AG\AG-Endres\Daten\Gertz-Kronenberg\von Majed\IMARIS\Microfetti\Ki-67 quantification\Data\2d\KGE4460\20241103_KGE-4460_L6_2d_e_Series009.ims
312	µm	Surface	Position	134	µm	Surface	Position	10400	µm	Surface	Position	0	33	0	1	RFP	700003	4	RFP	700001	20241103_KGE-4460_L6_2d_e_Series009.ims	S:\AG\AG-Endres\Daten\Gertz-Kronenberg\von Majed\IMARIS\Microfetti\Ki-67 quantification\Data\2d\KGE4460\20241103_KGE-4460_L6_2d_e_Series009.ims
162	µm	Surface	Position	256	µm	Surface	Position	10400	µm	Surface	Position	1	34	0	1	RFP	700003	5	RFP	700001	20241103_KGE-4460_L6_2d_e_Series009.ims	S:\AG\AG-Endres\Daten\Gertz-Kronenberg\von Majed\IMARIS\Microfetti\Ki-67 quantification\Data\2d\KGE4460\20241103_KGE-4460_L6_2d_e_Series009.ims
63.5	µm	Surface	Position	284	µm	Surface	Position	10400	µm	Surface	Position	0	35	0	1	RFP	700003	6	RFP	700001	20241103_KGE-4460_L6_2d_e_Series009.ims	S:\AG\AG-Endres\Daten\Gertz-Kronenberg\von Majed\IMARIS\Microfetti\Ki-67 quantification\Data\2d\KGE4460\20241103_KGE-4460_L6_2d_e_Series009.ims
99.9	µm	Surface	Position	67.8	µm	Surface	Position	10400	µm	Surface	Position	0	36	0	1	RFP	700003	7	RFP	700001	20241103_KGE-4460_L6_2d_e_Series009.ims	S:\AG\AG-Endres\Daten\Gertz-Kronenberg\von Majed\IMARIS\Microfetti\Ki-67 quantification\Data\2d\KGE4460\20241103_KGE-4460_L6_2d_e_Series009.ims
179	µm	Surface	Position	334	µm	Surface	Position	10500	µm	Surface	Position	0	37	0	1	RFP	700003	7	RFP	700004	20241102_kge-4590_l6_2d_a_series001_a_series001.ims	S:\AG\AG-Endres\Daten\Gertz-Kronenberg\von Majed\IMARIS\Microfetti\Ki-67 quantification\Data\2d\KGE4590\20241102_kge-4590_l6_2d_a_series001_a_series001.ims
111	µm	Surface	Position	353	µm	Surface	Position	10500	µm	Surface	Position	1	38	0	1	RFP	700003	8	RFP	700004	20241102_kge-4590_l6_2d_a_series001_a_series001.ims	S:\AG\AG-Endres\Daten\Gertz-Kronenberg\von Majed\IMARIS\Microfetti\Ki-67 quantification\Data\2d\KGE4590\20241102_kge-4590_l6_2d_a_series001_a_series001.ims
42.2	µm	Surface	Position	350	µm	Surface	Position	10500	µm	Surface	Position	0	39	0	1	RFP	700003	11	RFP	700004	20241102_kge-4590_l6_2d_a_series001_a_series001.ims	S:\AG\AG-Endres\Daten\Gertz-Kronenberg\von Majed\IMARIS\Microfetti\Ki-67 quantification\Data\2d\KGE4590\20241102_kge-4590_l6_2d_a_series001_a_series001.ims
7.82	µm	Surface	Position	269	µm	Surface	Position	10500	µm	Surface	Position	1	40	0	1	RFP	700003	16	RFP	700004	20241102_kge-4590_l6_2d_a_series001_a_series001.ims	S:\AG\AG-Endres\Daten\Gertz-Kronenberg\von Majed\IMARIS\Microfetti\Ki-67 quantification\Data\2d\KGE4590\20241102_kge-4590_l6_2d_a_series001_a_series001.ims
279	µm	Surface	Position	157	µm	Surface	Position	10500	µm	Surface	Position	0	41	0	1	RFP	700003	18	RFP	700004	20241102_kge-4590_l6_2d_a_series001_b_series004.ims	S:\AG\AG-Endres\Daten\Gertz-Kronenberg\von Majed\IMARIS\Microfetti\Ki-67 quantification\Data\2d\KGE4590\20241102_kge-4590_l6_2d_a_series001_b_series004.ims
85.1	µm	Surface	Position	351	µm	Surface	Position	10500	µm	Surface	Position	1	42	0	1	RFP	700003	19	RFP	700004	20241102_kge-4590_l6_2d_a_series001_b_series004.ims	S:\AG\AG-Endres\Daten\Gertz-Kronenberg\von Majed\IMARIS\Microfetti\Ki-67 quantification\Data\2d\KGE4590\20241102_kge-4590_l6_2d_a_series001_b_series004.ims
256	µm	Surface	Position	124	µm	Surface	Position	10500	µm	Surface	Position	1	43	0	1	RFP	700003	20	RFP	700004	20241102_kge-4590_l6_2d_a_series001_b_series004.ims	S:\AG\AG-Endres\Daten\Gertz-Kronenberg\von Majed\IMARIS\Microfetti\Ki-67 quantification\Data\2d\KGE4590\20241102_kge-4590_l6_2d_a_series001_b_series004.ims
56.1	µm	Surface	Position	216	µm	Surface	Position	10500	µm	Surface	Position	1	44	0	1	RFP	700003	26	RFP	700004	20241102_kge-4590_l6_2d_a_series001_b_series004.ims	S:\AG\AG-Endres\Daten\Gertz-Kronenberg\von Majed\IMARIS\Microfetti\Ki-67 quantification\Data\2d\KGE4590\20241102_kge-4590_l6_2d_a_series001_b_series004.ims
187	µm	Surface	Position	94.3	µm	Surface	Position	10500	µm	Surface	Position	1	45	0	1	RFP	700003	28	RFP	700004	20241102_kge-4590_l6_2d_a_series001_b_series004.ims	S:\AG\AG-Endres\Daten\Gertz-Kronenberg\von Majed\IMARIS\Microfetti\Ki-67 quantification\Data\2d\KGE4590\20241102_kge-4590_l6_2d_a_series001_b_series004.ims
184	µm	Surface	Position	10.7	µm	Surface	Position	10500	µm	Surface	Position	0	46	0	1	RFP	700003	30	RFP	700004	20241102_kge-4590_l6_2d_a_series001_b_series004.ims	S:\AG\AG-Endres\Daten\Gertz-Kronenberg\von Majed\IMARIS\Microfetti\Ki-67 quantification\Data\2d\KGE4590\20241102_kge-4590_l6_2d_a_series001_b_series004.ims
57	µm	Surface	Position	178	µm	Surface	Position	10500	µm	Surface	Position	1	47	0	1	RFP	700003	31	RFP	700004	20241102_kge-4590_l6_2d_a_series001_b_series004.ims	S:\AG\AG-Endres\Daten\Gertz-Kronenberg\von Majed\IMARIS\Microfetti\Ki-67 quantification\Data\2d\KGE4590\20241102_kge-4590_l6_2d_a_series001_b_series004.ims
45.2	µm	Surface	Position	26.5	µm	Surface	Position	10500	µm	Surface	Position	0	48	0	1	RFP	700003	32	RFP	700004	20241102_kge-4590_l6_2d_a_series001_b_series004.ims	S:\AG\AG-Endres\Daten\Gertz-Kronenberg\von Majed\IMARIS\Microfetti\Ki-67 quantification\Data\2d\KGE4590\20241102_kge-4590_l6_2d_a_series001_b_series004.ims
116	µm	Surface	Position	30.3	µm	Surface	Position	10500	µm	Surface	Position	1	49	0	1	RFP	700003	37	RFP	700004	20241102_kge-4590_l6_2d_a_series001_b_series004.ims	S:\AG\AG-Endres\Daten\Gertz-Kronenberg\von Majed\IMARIS\Microfetti\Ki-67 quantification\Data\2d\KGE4590\20241102_kge-4590_l6_2d_a_series001_b_series004.ims
246	µm	Surface	Position	191	µm	Surface	Position	10500	µm	Surface	Position	0	50	0	1	RFP	700003	0	RFP	700004	20241102_kge-4590_l6_2d_a_series001_c_series006.ims	S:\AG\AG-Endres\Daten\Gertz-Kronenberg\von Majed\IMARIS\Microfetti\Ki-67 quantification\Data\2d\KGE4590\20241102_kge-4590_l6_2d_a_series001_c_series006.ims
228	µm	Surface	Position	190	µm	Surface	Position	10500	µm	Surface	Position	0	51	0	1	RFP	700003	1	RFP	700004	20241102_kge-4590_l6_2d_a_series001_c_series006.ims	S:\AG\AG-Endres\Daten\Gertz-Kronenberg\von Majed\IMARIS\Microfetti\Ki-67 quantification\Data\2d\KGE4590\20241102_kge-4590_l6_2d_a_series001_c_series006.ims
35.2	µm	Surface	Position	346	µm	Surface	Position	10500	µm	Surface	Position	0	52	0	1	RFP	700003	2	RFP	700004	20241102_kge-4590_l6_2d_a_series001_c_series006.ims	S:\AG\AG-Endres\Daten\Gertz-Kronenberg\von Majed\IMARIS\Microfetti\Ki-67 quantification\Data\2d\KGE4590\20241102_kge-4590_l6_2d_a_series001_c_series006.ims
111	µm	Surface	Position	222	µm	Surface	Position	10500	µm	Surface	Position	1	53	0	1	RFP	700003	3	RFP	700004	20241102_kge-4590_l6_2d_a_series001_c_series006.ims	S:\AG\AG-Endres\Daten\Gertz-Kronenberg\von Majed\IMARIS\Microfetti\Ki-67 quantification\Data\2d\KGE4590\20241102_kge-4590_l6_2d_a_series001_c_series006.ims
246	µm	Surface	Position	30.2	µm	Surface	Position	10500	µm	Surface	Position	0	54	0	1	RFP	700003	5	RFP	700004	20241102_kge-4590_l6_2d_a_series001_c_series006.ims	S:\AG\AG-Endres\Daten\Gertz-Kronenberg\von Majed\IMARIS\Microfetti\Ki-67 quantification\Data\2d\KGE4590\20241102_kge-4590_l6_2d_a_series001_c_series006.ims
219	µm	Surface	Position	62.1	µm	Surface	Position	10500	µm	Surface	Position	0	55	0	1	RFP	700003	6	RFP	700004	20241102_kge-4590_l6_2d_a_series001_c_series006.ims	S:\AG\AG-Endres\Daten\Gertz-Kronenberg\von Majed\IMARIS\Microfetti\Ki-67 quantification\Data\2d\KGE4590\20241102_kge-4590_l6_2d_a_series001_c_series006.ims
328	µm	Surface	Position	364	µm	Surface	Position	10500	µm	Surface	Position	1	56	0	1	RFP	700003	1	RFP	700004	20241102_kge-4590_l6_2d_a_series001_d_series009.ims	S:\AG\AG-Endres\Daten\Gertz-Kronenberg\von Majed\IMARIS\Microfetti\Ki-67 quantification\Data\2d\KGE4590\20241102_kge-4590_l6_2d_a_series001_d_series009.ims
303	µm	Surface	Position	293	µm	Surface	Position	10500	µm	Surface	Position	1	57	0	1	RFP	700003	2	RFP	700004	20241102_kge-4590_l6_2d_a_series001_d_series009.ims	S:\AG\AG-Endres\Daten\Gertz-Kronenberg\von Majed\IMARIS\Microfetti\Ki-67 quantification\Data\2d\KGE4590\20241102_kge-4590_l6_2d_a_series001_d_series009.ims
137	µm	Surface	Position	190	µm	Surface	Position	10500	µm	Surface	Position	1	58	0	1	RFP	700003	3	RFP	700004	20241102_kge-4590_l6_2d_a_series001_d_series009.ims	S:\AG\AG-Endres\Daten\Gertz-Kronenberg\von Majed\IMARIS\Microfetti\Ki-67 quantification\Data\2d\KGE4590\20241102_kge-4590_l6_2d_a_series001_d_series009.ims
148	µm	Surface	Position	61	µm	Surface	Position	10500	µm	Surface	Position	0	59	0	1	RFP	700003	5	RFP	700004	20241102_kge-4590_l6_2d_a_series001_d_series009.ims	S:\AG\AG-Endres\Daten\Gertz-Kronenberg\von Majed\IMARIS\Microfetti\Ki-67 quantification\Data\2d\KGE4590\20241102_kge-4590_l6_2d_a_series001_d_series009.ims
340	µm	Surface	Position	313	µm	Surface	Position	10500	µm	Surface	Position	1	60	0	1	RFP	700003	24	RFP	700004	20241102_kge-4590_l6_2d_a_series001_e_series011.ims	S:\AG\AG-Endres\Daten\Gertz-Kronenberg\von Majed\IMARIS\Microfetti\Ki-67 quantification\Data\2d\KGE4590\20241102_kge-4590_l6_2d_a_series001_e_series011.ims
168	µm	Surface	Position	298	µm	Surface	Position	10500	µm	Surface	Position	1	61	0	1	RFP	700003	27	RFP	700004	20241102_kge-4590_l6_2d_a_series001_e_series011.ims	S:\AG\AG-Endres\Daten\Gertz-Kronenberg\von Majed\IMARIS\Microfetti\Ki-67 quantification\Data\2d\KGE4590\20241102_kge-4590_l6_2d_a_series001_e_series011.ims
351	µm	Surface	Position	33.3	µm	Surface	Position	10500	µm	Surface	Position	0	62	0	1	RFP	700003	29	RFP	700004	20241102_kge-4590_l6_2d_a_series001_e_series011.ims	S:\AG\AG-Endres\Daten\Gertz-Kronenberg\von Majed\IMARIS\Microfetti\Ki-67 quantification\Data\2d\KGE4590\20241102_kge-4590_l6_2d_a_series001_e_series011.ims
145	µm	Surface	Position	264	µm	Surface	Position	10500	µm	Surface	Position	1	63	0	1	RFP	700003	31	RFP	700004	20241102_kge-4590_l6_2d_a_series001_e_series011.ims	S:\AG\AG-Endres\Daten\Gertz-Kronenberg\von Majed\IMARIS\Microfetti\Ki-67 quantification\Data\2d\KGE4590\20241102_kge-4590_l6_2d_a_series001_e_series011.ims
82.4	µm	Surface	Position	167	µm	Surface	Position	10500	µm	Surface	Position	0	64	0	1	RFP	700003	41	RFP	700004	20241102_kge-4590_l6_2d_a_series001_e_series011.ims	S:\AG\AG-Endres\Daten\Gertz-Kronenberg\von Majed\IMARIS\Microfetti\Ki-67 quantification\Data\2d\KGE4590\20241102_kge-4590_l6_2d_a_series001_e_series011.ims
135	µm	Surface	Position	14.3	µm	Surface	Position	10500	µm	Surface	Position	0	65	0	1	RFP	700003	48	RFP	700004	20241102_kge-4590_l6_2d_a_series001_e_series011.ims	S:\AG\AG-Endres\Daten\Gertz-Kronenberg\von Majed\IMARIS\Microfetti\Ki-67 quantification\Data\2d\KGE4590\20241102_kge-4590_l6_2d_a_series001_e_series011.ims
354	µm	Surface	Position	155	µm	Surface	Position	10500	µm	Surface	Position	0	66	0	1	RFP	700003	0	RFP	700004	20241102_kge-4590_l6_2d_a_series001_f_series013.ims	S:\AG\AG-Endres\Daten\Gertz-Kronenberg\von Majed\IMARIS\Microfetti\Ki-67 quantification\Data\2d\KGE4590\20241102_kge-4590_l6_2d_a_series001_f_series013.ims
310	µm	Surface	Position	223	µm	Surface	Position	10500	µm	Surface	Position	1	67	0	1	RFP	700003	2	RFP	700004	20241102_kge-4590_l6_2d_a_series001_f_series013.ims	S:\AG\AG-Endres\Daten\Gertz-Kronenberg\von Majed\IMARIS\Microfetti\Ki-67 quantification\Data\2d\KGE4590\20241102_kge-4590_l6_2d_a_series001_f_series013.ims
242	µm	Surface	Position	282	µm	Surface	Position	10500	µm	Surface	Position	0	68	0	1	RFP	700003	3	RFP	700004	20241102_kge-4590_l6_2d_a_series001_f_series013.ims	S:\AG\AG-Endres\Daten\Gertz-Kronenberg\von Majed\IMARIS\Microfetti\Ki-67 quantification\Data\2d\KGE4590\20241102_kge-4590_l6_2d_a_series001_f_series013.ims
270	µm	Surface	Position	203	µm	Surface	Position	10500	µm	Surface	Position	1	69	0	1	RFP	700003	5	RFP	700004	20241102_kge-4590_l6_2d_a_series001_f_series013.ims	S:\AG\AG-Endres\Daten\Gertz-Kronenberg\von Majed\IMARIS\Microfetti\Ki-67 quantification\Data\2d\KGE4590\20241102_kge-4590_l6_2d_a_series001_f_series013.ims
258	µm	Surface	Position	192	µm	Surface	Position	10500	µm	Surface	Position	0	70	0	1	RFP	700003	6	RFP	700004	20241102_kge-4590_l6_2d_a_series001_f_series013.ims	S:\AG\AG-Endres\Daten\Gertz-Kronenberg\von Majed\IMARIS\Microfetti\Ki-67 quantification\Data\2d\KGE4590\20241102_kge-4590_l6_2d_a_series001_f_series013.ims
88.1	µm	Surface	Position	317	µm	Surface	Position	10500	µm	Surface	Position	1	71	0	1	RFP	700003	7	RFP	700004	20241102_kge-4590_l6_2d_a_series001_f_series013.ims	S:\AG\AG-Endres\Daten\Gertz-Kronenberg\von Majed\IMARIS\Microfetti\Ki-67 quantification\Data\2d\KGE4590\20241102_kge-4590_l6_2d_a_series001_f_series013.ims
23.5	µm	Surface	Position	269	µm	Surface	Position	10500	µm	Surface	Position	0	72	0	1	RFP	700003	9	RFP	700004	20241102_kge-4590_l6_2d_a_series001_f_series013.ims	S:\AG\AG-Endres\Daten\Gertz-Kronenberg\von Majed\IMARIS\Microfetti\Ki-67 quantification\Data\2d\KGE4590\20241102_kge-4590_l6_2d_a_series001_f_series013.ims
266	µm	Surface	Position	24.5	µm	Surface	Position	10500	µm	Surface	Position	0	73	0	1	RFP	700003	11	RFP	700004	20241102_kge-4590_l6_2d_a_series001_f_series013.ims	S:\AG\AG-Endres\Daten\Gertz-Kronenberg\von Majed\IMARIS\Microfetti\Ki-67 quantification\Data\2d\KGE4590\20241102_kge-4590_l6_2d_a_series001_f_series013.ims
20	µm	Surface	Position	282	µm	Surface	Position	10500	µm	Surface	Position	0	74	0	1	RFP	700003	13	RFP	700004	20241102_kge-4590_l6_2d_a_series001_f_series013.ims	S:\AG\AG-Endres\Daten\Gertz-Kronenberg\von Majed\IMARIS\Microfetti\Ki-67 quantification\Data\2d\KGE4590\20241102_kge-4590_l6_2d_a_series001_f_series013.ims
18.9	µm	Surface	Position	198	µm	Surface	Position	10500	µm	Surface	Position	0	75	0	1	RFP	700003	17	RFP	700004	20241102_kge-4590_l6_2d_a_series001_f_series013.ims	S:\AG\AG-Endres\Daten\Gertz-Kronenberg\von Majed\IMARIS\Microfetti\Ki-67 quantification\Data\2d\KGE4590\20241102_kge-4590_l6_2d_a_series001_f_series013.ims
207	µm	Surface	Position	274	µm	Surface	Position	10400	µm	Surface	Position	1	76	0	1	RFP	700003	8	RFP	700004	20241102_KGE-4593_L6_2d_a_Series001.ims	S:\AG\AG-Endres\Daten\Gertz-Kronenberg\von Majed\IMARIS\Microfetti\Ki-67 quantification\Data\2d\KGE4593\20241102_KGE-4593_L6_2d_a_Series001.ims
98.4	µm	Surface	Position	365	µm	Surface	Position	10300	µm	Surface	Position	1	77	0	1	RFP	700003	9	RFP	700004	20241102_KGE-4593_L6_2d_a_Series001.ims	S:\AG\AG-Endres\Daten\Gertz-Kronenberg\von Majed\IMARIS\Microfetti\Ki-67 quantification\Data\2d\KGE4593\20241102_KGE-4593_L6_2d_a_Series001.ims
107	µm	Surface	Position	130	µm	Surface	Position	10400	µm	Surface	Position	0	78	0	1	RFP	700003	12	RFP	700004	20241102_KGE-4593_L6_2d_a_Series001.ims	S:\AG\AG-Endres\Daten\Gertz-Kronenberg\von Majed\IMARIS\Microfetti\Ki-67 quantification\Data\2d\KGE4593\20241102_KGE-4593_L6_2d_a_Series001.ims
75.3	µm	Surface	Position	70.1	µm	Surface	Position	10300	µm	Surface	Position	1	79	0	1	RFP	700003	13	RFP	700004	20241102_KGE-4593_L6_2d_a_Series001.ims	S:\AG\AG-Endres\Daten\Gertz-Kronenberg\von Majed\IMARIS\Microfetti\Ki-67 quantification\Data\2d\KGE4593\20241102_KGE-4593_L6_2d_a_Series001.ims
97.9	µm	Surface	Position	60.2	µm	Surface	Position	10400	µm	Surface	Position	1	80	0	1	RFP	700003	14	RFP	700004	20241102_KGE-4593_L6_2d_a_Series001.ims	S:\AG\AG-Endres\Daten\Gertz-Kronenberg\von Majed\IMARIS\Microfetti\Ki-67 quantification\Data\2d\KGE4593\20241102_KGE-4593_L6_2d_a_Series001.ims
173	µm	Surface	Position	255	µm	Surface	Position	10300	µm	Surface	Position	0	81	0	1	RFP	700003	2	RFP	700004	20241102_KGE-4593_L6_2d_b_Series003.ims	S:\AG\AG-Endres\Daten\Gertz-Kronenberg\von Majed\IMARIS\Microfetti\Ki-67 quantification\Data\2d\KGE4593\20241102_KGE-4593_L6_2d_b_Series003.ims
166	µm	Surface	Position	243	µm	Surface	Position	10400	µm	Surface	Position	1	82	0	1	RFP	700003	5	RFP	700004	20241102_KGE-4593_L6_2d_b_Series003.ims	S:\AG\AG-Endres\Daten\Gertz-Kronenberg\von Majed\IMARIS\Microfetti\Ki-67 quantification\Data\2d\KGE4593\20241102_KGE-4593_L6_2d_b_Series003.ims
107	µm	Surface	Position	227	µm	Surface	Position	10400	µm	Surface	Position	1	83	0	1	RFP	700003	6	RFP	700004	20241102_KGE-4593_L6_2d_b_Series003.ims	S:\AG\AG-Endres\Daten\Gertz-Kronenberg\von Majed\IMARIS\Microfetti\Ki-67 quantification\Data\2d\KGE4593\20241102_KGE-4593_L6_2d_b_Series003.ims
290	µm	Surface	Position	12.1	µm	Surface	Position	10400	µm	Surface	Position	1	84	0	1	RFP	700003	7	RFP	700004	20241102_KGE-4593_L6_2d_b_Series003.ims	S:\AG\AG-Endres\Daten\Gertz-Kronenberg\von Majed\IMARIS\Microfetti\Ki-67 quantification\Data\2d\KGE4593\20241102_KGE-4593_L6_2d_b_Series003.ims
98.8	µm	Surface	Position	215	µm	Surface	Position	10400	µm	Surface	Position	0	85	0	1	RFP	700003	9	RFP	700004	20241102_KGE-4593_L6_2d_b_Series003.ims	S:\AG\AG-Endres\Daten\Gertz-Kronenberg\von Majed\IMARIS\Microfetti\Ki-67 quantification\Data\2d\KGE4593\20241102_KGE-4593_L6_2d_b_Series003.ims
118	µm	Surface	Position	191	µm	Surface	Position	10300	µm	Surface	Position	1	86	0	1	RFP	700003	11	RFP	700004	20241102_KGE-4593_L6_2d_b_Series003.ims	S:\AG\AG-Endres\Daten\Gertz-Kronenberg\von Majed\IMARIS\Microfetti\Ki-67 quantification\Data\2d\KGE4593\20241102_KGE-4593_L6_2d_b_Series003.ims
93	µm	Surface	Position	91.5	µm	Surface	Position	10300	µm	Surface	Position	1	87	0	1	RFP	700003	22	RFP	700004	20241102_KGE-4593_L6_2d_b_Series003.ims	S:\AG\AG-Endres\Daten\Gertz-Kronenberg\von Majed\IMARIS\Microfetti\Ki-67 quantification\Data\2d\KGE4593\20241102_KGE-4593_L6_2d_b_Series003.ims
103	µm	Surface	Position	116	µm	Surface	Position	10400	µm	Surface	Position	1	88	0	1	RFP	700003	25	RFP	700004	20241102_KGE-4593_L6_2d_b_Series003.ims	S:\AG\AG-Endres\Daten\Gertz-Kronenberg\von Majed\IMARIS\Microfetti\Ki-67 quantification\Data\2d\KGE4593\20241102_KGE-4593_L6_2d_b_Series003.ims
178	µm	Surface	Position	213	µm	Surface	Position	10400	µm	Surface	Position	0	89	0	1	RFP	700003	0	RFP	700004	20241102_KGE-4593_L6_2d_c_Series005.ims	S:\AG\AG-Endres\Daten\Gertz-Kronenberg\von Majed\IMARIS\Microfetti\Ki-67 quantification\Data\2d\KGE4593\20241102_KGE-4593_L6_2d_c_Series005.ims
145	µm	Surface	Position	219	µm	Surface	Position	10400	µm	Surface	Position	0	90	0	1	RFP	700003	1	RFP	700004	20241102_KGE-4593_L6_2d_c_Series005.ims	S:\AG\AG-Endres\Daten\Gertz-Kronenberg\von Majed\IMARIS\Microfetti\Ki-67 quantification\Data\2d\KGE4593\20241102_KGE-4593_L6_2d_c_Series005.ims
318	µm	Surface	Position	321	µm	Surface	Position	10400	µm	Surface	Position	0	91	0	1	RFP	700003	2	RFP	700004	20241102_KGE-4593_L6_2d_d_Series009.ims	S:\AG\AG-Endres\Daten\Gertz-Kronenberg\von Majed\IMARIS\Microfetti\Ki-67 quantification\Data\2d\KGE4593\20241102_KGE-4593_L6_2d_d_Series009.ims
222	µm	Surface	Position	305	µm	Surface	Position	10400	µm	Surface	Position	1	92	0	1	RFP	700003	5	RFP	700004	20241102_KGE-4593_L6_2d_d_Series009.ims	S:\AG\AG-Endres\Daten\Gertz-Kronenberg\von Majed\IMARIS\Microfetti\Ki-67 quantification\Data\2d\KGE4593\20241102_KGE-4593_L6_2d_d_Series009.ims
228	µm	Surface	Position	292	µm	Surface	Position	10400	µm	Surface	Position	1	93	0	1	RFP	700003	6	RFP	700004	20241102_KGE-4593_L6_2d_d_Series009.ims	S:\AG\AG-Endres\Daten\Gertz-Kronenberg\von Majed\IMARIS\Microfetti\Ki-67 quantification\Data\2d\KGE4593\20241102_KGE-4593_L6_2d_d_Series009.ims
122	µm	Surface	Position	342	µm	Surface	Position	10400	µm	Surface	Position	1	94	0	1	RFP	700003	9	RFP	700004	20241102_KGE-4593_L6_2d_d_Series009.ims	S:\AG\AG-Endres\Daten\Gertz-Kronenberg\von Majed\IMARIS\Microfetti\Ki-67 quantification\Data\2d\KGE4593\20241102_KGE-4593_L6_2d_d_Series009.ims
118	µm	Surface	Position	337	µm	Surface	Position	10400	µm	Surface	Position	1	95	0	1	RFP	700003	11	RFP	700004	20241102_KGE-4593_L6_2d_d_Series009.ims	S:\AG\AG-Endres\Daten\Gertz-Kronenberg\von Majed\IMARIS\Microfetti\Ki-67 quantification\Data\2d\KGE4593\20241102_KGE-4593_L6_2d_d_Series009.ims
171	µm	Surface	Position	197	µm	Surface	Position	10400	µm	Surface	Position	0	96	0	1	RFP	700003	12	RFP	700004	20241102_KGE-4593_L6_2d_d_Series009.ims	S:\AG\AG-Endres\Daten\Gertz-Kronenberg\von Majed\IMARIS\Microfetti\Ki-67 quantification\Data\2d\KGE4593\20241102_KGE-4593_L6_2d_d_Series009.ims
155	µm	Surface	Position	162	µm	Surface	Position	10400	µm	Surface	Position	0	97	0	1	RFP	700003	22	RFP	700004	20241102_KGE-4593_L6_2d_d_Series009.ims	S:\AG\AG-Endres\Daten\Gertz-Kronenberg\von Majed\IMARIS\Microfetti\Ki-67 quantification\Data\2d\KGE4593\20241102_KGE-4593_L6_2d_d_Series009.ims
143	µm	Surface	Position	118	µm	Surface	Position	10400	µm	Surface	Position	0	98	0	1	RFP	700003	27	RFP	700004	20241102_KGE-4593_L6_2d_d_Series009.ims	S:\AG\AG-Endres\Daten\Gertz-Kronenberg\von Majed\IMARIS\Microfetti\Ki-67 quantification\Data\2d\KGE4593\20241102_KGE-4593_L6_2d_d_Series009.ims
195	µm	Surface	Position	22	µm	Surface	Position	10400	µm	Surface	Position	0	99	0	1	RFP	700003	31	RFP	700004	20241102_KGE-4593_L6_2d_d_Series009.ims	S:\AG\AG-Endres\Daten\Gertz-Kronenberg\von Majed\IMARIS\Microfetti\Ki-67 quantification\Data\2d\KGE4593\20241102_KGE-4593_L6_2d_d_Series009.ims
122	µm	Surface	Position	88.1	µm	Surface	Position	10400	µm	Surface	Position	0	100	0	1	RFP	700003	32	RFP	700004	20241102_KGE-4593_L6_2d_d_Series009.ims	S:\AG\AG-Endres\Daten\Gertz-Kronenberg\von Majed\IMARIS\Microfetti\Ki-67 quantification\Data\2d\KGE4593\20241102_KGE-4593_L6_2d_d_Series009.ims
114	µm	Surface	Position	22.8	µm	Surface	Position	10400	µm	Surface	Position	0	101	0	1	RFP	700003	47	RFP	700004	20241102_KGE-4593_L6_2d_d_Series009.ims	S:\AG\AG-Endres\Daten\Gertz-Kronenberg\von Majed\IMARIS\Microfetti\Ki-67 quantification\Data\2d\KGE4593\20241102_KGE-4593_L6_2d_d_Series009.ims
115	µm	Surface	Position	13.1	µm	Surface	Position	10400	µm	Surface	Position	0	102	0	1	RFP	700003	50	RFP	700004	20241102_KGE-4593_L6_2d_d_Series009.ims	S:\AG\AG-Endres\Daten\Gertz-Kronenberg\von Majed\IMARIS\Microfetti\Ki-67 quantification\Data\2d\KGE4593\20241102_KGE-4593_L6_2d_d_Series009.ims
243	µm	Surface	Position	219	µm	Surface	Position	10300	µm	Surface	Position	0	103	0	1	RFP	700003	3	RFP	700004	20241102_KGE-4593_L6_2d_e_Series013.ims	S:\AG\AG-Endres\Daten\Gertz-Kronenberg\von Majed\IMARIS\Microfetti\Ki-67 quantification\Data\2d\KGE4593\20241102_KGE-4593_L6_2d_e_Series013.ims
298	µm	Surface	Position	135	µm	Surface	Position	10400	µm	Surface	Position	0	104	0	1	RFP	700003	7	RFP	700004	20241102_KGE-4593_L6_2d_e_Series013.ims	S:\AG\AG-Endres\Daten\Gertz-Kronenberg\von Majed\IMARIS\Microfetti\Ki-67 quantification\Data\2d\KGE4593\20241102_KGE-4593_L6_2d_e_Series013.ims
194	µm	Surface	Position	268	µm	Surface	Position	10300	µm	Surface	Position	1	105	0	1	RFP	700003	0	RFP	700004	20241102_KGE-5193_L8_2d_a_Series001.ims	S:\AG\AG-Endres\Daten\Gertz-Kronenberg\von Majed\IMARIS\Microfetti\Ki-67 quantification\Data\2d\KGE5193\20241102_KGE-5193_L8_2d_a_Series001.ims
253	µm	Surface	Position	197	µm	Surface	Position	10300	µm	Surface	Position	1	106	0	1	RFP	700003	1	RFP	700004	20241102_KGE-5193_L8_2d_a_Series001.ims	S:\AG\AG-Endres\Daten\Gertz-Kronenberg\von Majed\IMARIS\Microfetti\Ki-67 quantification\Data\2d\KGE5193\20241102_KGE-5193_L8_2d_a_Series001.ims
164	µm	Surface	Position	242	µm	Surface	Position	10300	µm	Surface	Position	1	107	0	1	RFP	700003	6	RFP	700004	20241102_KGE-5193_L8_2d_a_Series001.ims	S:\AG\AG-Endres\Daten\Gertz-Kronenberg\von Majed\IMARIS\Microfetti\Ki-67 quantification\Data\2d\KGE5193\20241102_KGE-5193_L8_2d_a_Series001.ims
272	µm	Surface	Position	149	µm	Surface	Position	10300	µm	Surface	Position	1	108	0	1	RFP	700003	7	RFP	700004	20241102_KGE-5193_L8_2d_a_Series001.ims	S:\AG\AG-Endres\Daten\Gertz-Kronenberg\von Majed\IMARIS\Microfetti\Ki-67 quantification\Data\2d\KGE5193\20241102_KGE-5193_L8_2d_a_Series001.ims
308	µm	Surface	Position	92.4	µm	Surface	Position	10300	µm	Surface	Position	0	109	0	1	RFP	700003	10	RFP	700004	20241102_KGE-5193_L8_2d_a_Series001.ims	S:\AG\AG-Endres\Daten\Gertz-Kronenberg\von Majed\IMARIS\Microfetti\Ki-67 quantification\Data\2d\KGE5193\20241102_KGE-5193_L8_2d_a_Series001.ims
306	µm	Surface	Position	109	µm	Surface	Position	10300	µm	Surface	Position	1	110	0	1	RFP	700003	12	RFP	700004	20241102_KGE-5193_L8_2d_a_Series001.ims	S:\AG\AG-Endres\Daten\Gertz-Kronenberg\von Majed\IMARIS\Microfetti\Ki-67 quantification\Data\2d\KGE5193\20241102_KGE-5193_L8_2d_a_Series001.ims
266	µm	Surface	Position	134	µm	Surface	Position	10300	µm	Surface	Position	1	111	0	1	RFP	700003	13	RFP	700004	20241102_KGE-5193_L8_2d_a_Series001.ims	S:\AG\AG-Endres\Daten\Gertz-Kronenberg\von Majed\IMARIS\Microfetti\Ki-67 quantification\Data\2d\KGE5193\20241102_KGE-5193_L8_2d_a_Series001.ims
148	µm	Surface	Position	173	µm	Surface	Position	10300	µm	Surface	Position	1	112	0	1	RFP	700003	15	RFP	700004	20241102_KGE-5193_L8_2d_a_Series001.ims	S:\AG\AG-Endres\Daten\Gertz-Kronenberg\von Majed\IMARIS\Microfetti\Ki-67 quantification\Data\2d\KGE5193\20241102_KGE-5193_L8_2d_a_Series001.ims
263	µm	Surface	Position	3.86	µm	Surface	Position	10300	µm	Surface	Position	1	113	0	1	RFP	700003	19	RFP	700004	20241102_KGE-5193_L8_2d_a_Series001.ims	S:\AG\AG-Endres\Daten\Gertz-Kronenberg\von Majed\IMARIS\Microfetti\Ki-67 quantification\Data\2d\KGE5193\20241102_KGE-5193_L8_2d_a_Series001.ims
263	µm	Surface	Position	11.4	µm	Surface	Position	10300	µm	Surface	Position	1	114	0	1	RFP	700003	21	RFP	700004	20241102_KGE-5193_L8_2d_a_Series001.ims	S:\AG\AG-Endres\Daten\Gertz-Kronenberg\von Majed\IMARIS\Microfetti\Ki-67 quantification\Data\2d\KGE5193\20241102_KGE-5193_L8_2d_a_Series001.ims
57	µm	Surface	Position	138	µm	Surface	Position	10300	µm	Surface	Position	0	115	0	1	RFP	700003	25	RFP	700004	20241102_KGE-5193_L8_2d_a_Series001.ims	S:\AG\AG-Endres\Daten\Gertz-Kronenberg\von Majed\IMARIS\Microfetti\Ki-67 quantification\Data\2d\KGE5193\20241102_KGE-5193_L8_2d_a_Series001.ims
113	µm	Surface	Position	118	µm	Surface	Position	10300	µm	Surface	Position	1	116	0	1	RFP	700003	26	RFP	700004	20241102_KGE-5193_L8_2d_a_Series001.ims	S:\AG\AG-Endres\Daten\Gertz-Kronenberg\von Majed\IMARIS\Microfetti\Ki-67 quantification\Data\2d\KGE5193\20241102_KGE-5193_L8_2d_a_Series001.ims
124	µm	Surface	Position	110	µm	Surface	Position	10300	µm	Surface	Position	1	117	0	1	RFP	700003	27	RFP	700004	20241102_KGE-5193_L8_2d_a_Series001.ims	S:\AG\AG-Endres\Daten\Gertz-Kronenberg\von Majed\IMARIS\Microfetti\Ki-67 quantification\Data\2d\KGE5193\20241102_KGE-5193_L8_2d_a_Series001.ims
8.61	µm	Surface	Position	204	µm	Surface	Position	10300	µm	Surface	Position	1	118	0	1	RFP	700003	31	RFP	700004	20241102_KGE-5193_L8_2d_a_Series001.ims	S:\AG\AG-Endres\Daten\Gertz-Kronenberg\von Majed\IMARIS\Microfetti\Ki-67 quantification\Data\2d\KGE5193\20241102_KGE-5193_L8_2d_a_Series001.ims
353	µm	Surface	Position	202	µm	Surface	Position	10300	µm	Surface	Position	1	119	0	1	RFP	700003	0	RFP	700004	20241102_KGE-5193_L8_2d_b_Series003.ims	S:\AG\AG-Endres\Daten\Gertz-Kronenberg\von Majed\IMARIS\Microfetti\Ki-67 quantification\Data\2d\KGE5193\20241102_KGE-5193_L8_2d_b_Series003.ims
316	µm	Surface	Position	212	µm	Surface	Position	10300	µm	Surface	Position	0	120	0	1	RFP	700003	3	RFP	700004	20241102_KGE-5193_L8_2d_b_Series003.ims	S:\AG\AG-Endres\Daten\Gertz-Kronenberg\von Majed\IMARIS\Microfetti\Ki-67 quantification\Data\2d\KGE5193\20241102_KGE-5193_L8_2d_b_Series003.ims
199	µm	Surface	Position	211	µm	Surface	Position	10300	µm	Surface	Position	1	121	0	1	RFP	700003	9	RFP	700004	20241102_KGE-5193_L8_2d_b_Series003.ims	S:\AG\AG-Endres\Daten\Gertz-Kronenberg\von Majed\IMARIS\Microfetti\Ki-67 quantification\Data\2d\KGE5193\20241102_KGE-5193_L8_2d_b_Series003.ims
122	µm	Surface	Position	244	µm	Surface	Position	10300	µm	Surface	Position	1	122	0	1	RFP	700003	10	RFP	700004	20241102_KGE-5193_L8_2d_b_Series003.ims	S:\AG\AG-Endres\Daten\Gertz-Kronenberg\von Majed\IMARIS\Microfetti\Ki-67 quantification\Data\2d\KGE5193\20241102_KGE-5193_L8_2d_b_Series003.ims
33	µm	Surface	Position	303	µm	Surface	Position	10300	µm	Surface	Position	1	123	0	1	RFP	700003	13	RFP	700004	20241102_KGE-5193_L8_2d_b_Series003.ims	S:\AG\AG-Endres\Daten\Gertz-Kronenberg\von Majed\IMARIS\Microfetti\Ki-67 quantification\Data\2d\KGE5193\20241102_KGE-5193_L8_2d_b_Series003.ims
32.7	µm	Surface	Position	295	µm	Surface	Position	10300	µm	Surface	Position	1	124	0	1	RFP	700003	16	RFP	700004	20241102_KGE-5193_L8_2d_b_Series003.ims	S:\AG\AG-Endres\Daten\Gertz-Kronenberg\von Majed\IMARIS\Microfetti\Ki-67 quantification\Data\2d\KGE5193\20241102_KGE-5193_L8_2d_b_Series003.ims
80	µm	Surface	Position	220	µm	Surface	Position	10300	µm	Surface	Position	1	125	0	1	RFP	700003	17	RFP	700004	20241102_KGE-5193_L8_2d_b_Series003.ims	S:\AG\AG-Endres\Daten\Gertz-Kronenberg\von Majed\IMARIS\Microfetti\Ki-67 quantification\Data\2d\KGE5193\20241102_KGE-5193_L8_2d_b_Series003.ims
236	µm	Surface	Position	25.1	µm	Surface	Position	10300	µm	Surface	Position	0	126	0	1	RFP	700003	28	RFP	700004	20241102_KGE-5193_L8_2d_b_Series003.ims	S:\AG\AG-Endres\Daten\Gertz-Kronenberg\von Majed\IMARIS\Microfetti\Ki-67 quantification\Data\2d\KGE5193\20241102_KGE-5193_L8_2d_b_Series003.ims
133	µm	Surface	Position	47.3	µm	Surface	Position	10300	µm	Surface	Position	0	127	0	1	RFP	700003	29	RFP	700004	20241102_KGE-5193_L8_2d_b_Series003.ims	S:\AG\AG-Endres\Daten\Gertz-Kronenberg\von Majed\IMARIS\Microfetti\Ki-67 quantification\Data\2d\KGE5193\20241102_KGE-5193_L8_2d_b_Series003.ims
205	µm	Surface	Position	39.8	µm	Surface	Position	10300	µm	Surface	Position	1	128	0	1	RFP	700003	1	RFP	700003	20241102_KGE-5193_L8_2d_c_Series005.ims	S:\AG\AG-Endres\Daten\Gertz-Kronenberg\von Majed\IMARIS\Microfetti\Ki-67 quantification\Data\2d\KGE5193\20241102_KGE-5193_L8_2d_c_Series005.ims
351	µm	Surface	Position	162	µm	Surface	Position	10300	µm	Surface	Position	1	129	0	1	RFP	700003	2	RFP	700004	20241102_KGE-5193_L8_2d_e_Series009.ims	S:\AG\AG-Endres\Daten\Gertz-Kronenberg\von Majed\IMARIS\Microfetti\Ki-67 quantification\Data\2d\KGE5193\20241102_KGE-5193_L8_2d_e_Series009.ims
239	µm	Surface	Position	180	µm	Surface	Position	10300	µm	Surface	Position	1	130	0	1	RFP	700003	5	RFP	700004	20241102_KGE-5193_L8_2d_e_Series009.ims	S:\AG\AG-Endres\Daten\Gertz-Kronenberg\von Majed\IMARIS\Microfetti\Ki-67 quantification\Data\2d\KGE5193\20241102_KGE-5193_L8_2d_e_Series009.ims
236	µm	Surface	Position	192	µm	Surface	Position	10300	µm	Surface	Position	1	131	0	1	RFP	700003	8	RFP	700004	20241102_KGE-5193_L8_2d_e_Series009.ims	S:\AG\AG-Endres\Daten\Gertz-Kronenberg\von Majed\IMARIS\Microfetti\Ki-67 quantification\Data\2d\KGE5193\20241102_KGE-5193_L8_2d_e_Series009.ims
41.4	µm	Surface	Position	303	µm	Surface	Position	10300	µm	Surface	Position	1	132	0	1	RFP	700003	9	RFP	700004	20241102_KGE-5193_L8_2d_e_Series009.ims	S:\AG\AG-Endres\Daten\Gertz-Kronenberg\von Majed\IMARIS\Microfetti\Ki-67 quantification\Data\2d\KGE5193\20241102_KGE-5193_L8_2d_e_Series009.ims
146	µm	Surface	Position	133	µm	Surface	Position	10300	µm	Surface	Position	1	133	0	1	RFP	700003	10	RFP	700004	20241102_KGE-5193_L8_2d_e_Series009.ims	S:\AG\AG-Endres\Daten\Gertz-Kronenberg\von Majed\IMARIS\Microfetti\Ki-67 quantification\Data\2d\KGE5193\20241102_KGE-5193_L8_2d_e_Series009.ims
122	µm	Surface	Position	121	µm	Surface	Position	10300	µm	Surface	Position	1	134	0	1	RFP	700003	11	RFP	700004	20241102_KGE-5193_L8_2d_e_Series009.ims	S:\AG\AG-Endres\Daten\Gertz-Kronenberg\von Majed\IMARIS\Microfetti\Ki-67 quantification\Data\2d\KGE5193\20241102_KGE-5193_L8_2d_e_Series009.ims
69.7	µm	Surface	Position	107	µm	Surface	Position	10300	µm	Surface	Position	1	135	0	1	RFP	700003	12	RFP	700004	20241102_KGE-5193_L8_2d_e_Series009.ims	S:\AG\AG-Endres\Daten\Gertz-Kronenberg\von Majed\IMARIS\Microfetti\Ki-67 quantification\Data\2d\KGE5193\20241102_KGE-5193_L8_2d_e_Series009.ims
177	µm	Surface	Position	336	µm	Surface	Position	10500	µm	Surface	Position	0	136	0	1	RFP	700003	1	RFP	700004	20241103_KGE-5319_L9_2d_a_Series001.ims	S:\AG\AG-Endres\Daten\Gertz-Kronenberg\von Majed\IMARIS\Microfetti\Ki-67 quantification\Data\2d\KGE5319\20241103_KGE-5319_L9_2d_a_Series001.ims
161	µm	Surface	Position	330	µm	Surface	Position	10500	µm	Surface	Position	1	137	0	1	RFP	700003	2	RFP	700004	20241103_KGE-5319_L9_2d_a_Series001.ims	S:\AG\AG-Endres\Daten\Gertz-Kronenberg\von Majed\IMARIS\Microfetti\Ki-67 quantification\Data\2d\KGE5319\20241103_KGE-5319_L9_2d_a_Series001.ims
15.6	µm	Surface	Position	223	µm	Surface	Position	10500	µm	Surface	Position	0	138	0	1	RFP	700003	4	RFP	700004	20241103_KGE-5319_L9_2d_a_Series001.ims	S:\AG\AG-Endres\Daten\Gertz-Kronenberg\von Majed\IMARIS\Microfetti\Ki-67 quantification\Data\2d\KGE5319\20241103_KGE-5319_L9_2d_a_Series001.ims
8.19	µm	Surface	Position	236	µm	Surface	Position	10500	µm	Surface	Position	1	139	0	1	RFP	700003	6	RFP	700004	20241103_KGE-5319_L9_2d_a_Series001.ims	S:\AG\AG-Endres\Daten\Gertz-Kronenberg\von Majed\IMARIS\Microfetti\Ki-67 quantification\Data\2d\KGE5319\20241103_KGE-5319_L9_2d_a_Series001.ims
25.3	µm	Surface	Position	120	µm	Surface	Position	10400	µm	Surface	Position	0	140	0	1	RFP	700003	8	RFP	700004	20241103_KGE-5319_L9_2d_a_Series001.ims	S:\AG\AG-Endres\Daten\Gertz-Kronenberg\von Majed\IMARIS\Microfetti\Ki-67 quantification\Data\2d\KGE5319\20241103_KGE-5319_L9_2d_a_Series001.ims
137	µm	Surface	Position	17.2	µm	Surface	Position	10400	µm	Surface	Position	1	141	0	1	RFP	700003	9	RFP	700004	20241103_KGE-5319_L9_2d_a_Series001.ims	S:\AG\AG-Endres\Daten\Gertz-Kronenberg\von Majed\IMARIS\Microfetti\Ki-67 quantification\Data\2d\KGE5319\20241103_KGE-5319_L9_2d_a_Series001.ims
69	µm	Surface	Position	22.8	µm	Surface	Position	10400	µm	Surface	Position	0	142	0	1	RFP	700003	12	RFP	700004	20241103_KGE-5319_L9_2d_a_Series001.ims	S:\AG\AG-Endres\Daten\Gertz-Kronenberg\von Majed\IMARIS\Microfetti\Ki-67 quantification\Data\2d\KGE5319\20241103_KGE-5319_L9_2d_a_Series001.ims
41.2	µm	Surface	Position	253	µm	Surface	Position	10500	µm	Surface	Position	0	143	0	1	RFP	700003	1	RFP	700003	20241103_KGE-5319_L9_2d_b_Series003.ims	S:\AG\AG-Endres\Daten\Gertz-Kronenberg\von Majed\IMARIS\Microfetti\Ki-67 quantification\Data\2d\KGE5319\20241103_KGE-5319_L9_2d_b_Series003.ims
357	µm	Surface	Position	237	µm	Surface	Position	10400	µm	Surface	Position	0	144	0	1	RFP	700003	0	RFP	700004	20241103_KGE-5319_L9_2d_c_Series005.ims	S:\AG\AG-Endres\Daten\Gertz-Kronenberg\von Majed\IMARIS\Microfetti\Ki-67 quantification\Data\2d\KGE5319\20241103_KGE-5319_L9_2d_c_Series005.ims
362	µm	Surface	Position	327	µm	Surface	Position	10500	µm	Surface	Position	1	145	0	1	RFP	700003	1	RFP	700004	20241103_KGE-5319_L9_2d_c_Series005.ims	S:\AG\AG-Endres\Daten\Gertz-Kronenberg\von Majed\IMARIS\Microfetti\Ki-67 quantification\Data\2d\KGE5319\20241103_KGE-5319_L9_2d_c_Series005.ims
132	µm	Surface	Position	352	µm	Surface	Position	10500	µm	Surface	Position	0	146	0	1	RFP	700003	2	RFP	700004	20241103_KGE-5319_L9_2d_c_Series005.ims	S:\AG\AG-Endres\Daten\Gertz-Kronenberg\von Majed\IMARIS\Microfetti\Ki-67 quantification\Data\2d\KGE5319\20241103_KGE-5319_L9_2d_c_Series005.ims
191	µm	Surface	Position	239	µm	Surface	Position	10500	µm	Surface	Position	0	147	0	1	RFP	700003	3	RFP	700004	20241103_KGE-5319_L9_2d_c_Series005.ims	S:\AG\AG-Endres\Daten\Gertz-Kronenberg\von Majed\IMARIS\Microfetti\Ki-67 quantification\Data\2d\KGE5319\20241103_KGE-5319_L9_2d_c_Series005.ims
93.2	µm	Surface	Position	237	µm	Surface	Position	10400	µm	Surface	Position	0	148	0	1	RFP	700003	4	RFP	700004	20241103_KGE-5319_L9_2d_c_Series005.ims	S:\AG\AG-Endres\Daten\Gertz-Kronenberg\von Majed\IMARIS\Microfetti\Ki-67 quantification\Data\2d\KGE5319\20241103_KGE-5319_L9_2d_c_Series005.ims
351	µm	Surface	Position	345	µm	Surface	Position	10500	µm	Surface	Position	0	149	0	1	RFP	700003	55	RFP	700004	20241103_KGE-5319_L9_2d_d_Series007.ims	S:\AG\AG-Endres\Daten\Gertz-Kronenberg\von Majed\IMARIS\Microfetti\Ki-67 quantification\Data\2d\KGE5319\20241103_KGE-5319_L9_2d_d_Series007.ims
257	µm	Surface	Position	290	µm	Surface	Position	10500	µm	Surface	Position	0	150	0	1	RFP	700003	56	RFP	700004	20241103_KGE-5319_L9_2d_d_Series007.ims	S:\AG\AG-Endres\Daten\Gertz-Kronenberg\von Majed\IMARIS\Microfetti\Ki-67 quantification\Data\2d\KGE5319\20241103_KGE-5319_L9_2d_d_Series007.ims
191	µm	Surface	Position	265	µm	Surface	Position	10500	µm	Surface	Position	0	151	0	1	RFP	700003	58	RFP	700004	20241103_KGE-5319_L9_2d_d_Series007.ims	S:\AG\AG-Endres\Daten\Gertz-Kronenberg\von Majed\IMARIS\Microfetti\Ki-67 quantification\Data\2d\KGE5319\20241103_KGE-5319_L9_2d_d_Series007.ims
172	µm	Surface	Position	304	µm	Surface	Position	10500	µm	Surface	Position	0	152	0	1	RFP	700003	60	RFP	700004	20241103_KGE-5319_L9_2d_d_Series007.ims	S:\AG\AG-Endres\Daten\Gertz-Kronenberg\von Majed\IMARIS\Microfetti\Ki-67 quantification\Data\2d\KGE5319\20241103_KGE-5319_L9_2d_d_Series007.ims
115	µm	Surface	Position	333	µm	Surface	Position	10500	µm	Surface	Position	0	153	0	1	RFP	700003	63	RFP	700004	20241103_KGE-5319_L9_2d_d_Series007.ims	S:\AG\AG-Endres\Daten\Gertz-Kronenberg\von Majed\IMARIS\Microfetti\Ki-67 quantification\Data\2d\KGE5319\20241103_KGE-5319_L9_2d_d_Series007.ims
300	µm	Surface	Position	137	µm	Surface	Position	10500	µm	Surface	Position	0	154	0	1	RFP	700003	66	RFP	700004	20241103_KGE-5319_L9_2d_d_Series007.ims	S:\AG\AG-Endres\Daten\Gertz-Kronenberg\von Majed\IMARIS\Microfetti\Ki-67 quantification\Data\2d\KGE5319\20241103_KGE-5319_L9_2d_d_Series007.ims
154	µm	Surface	Position	209	µm	Surface	Position	10500	µm	Surface	Position	0	155	0	1	RFP	700003	67	RFP	700004	20241103_KGE-5319_L9_2d_d_Series007.ims	S:\AG\AG-Endres\Daten\Gertz-Kronenberg\von Majed\IMARIS\Microfetti\Ki-67 quantification\Data\2d\KGE5319\20241103_KGE-5319_L9_2d_d_Series007.ims
227	µm	Surface	Position	37.8	µm	Surface	Position	10500	µm	Surface	Position	0	156	0	1	RFP	700003	69	RFP	700004	20241103_KGE-5319_L9_2d_d_Series007.ims	S:\AG\AG-Endres\Daten\Gertz-Kronenberg\von Majed\IMARIS\Microfetti\Ki-67 quantification\Data\2d\KGE5319\20241103_KGE-5319_L9_2d_d_Series007.ims
33.8	µm	Surface	Position	189	µm	Surface	Position	10500	µm	Surface	Position	0	157	0	1	RFP	700003	72	RFP	700004	20241103_KGE-5319_L9_2d_d_Series007.ims	S:\AG\AG-Endres\Daten\Gertz-Kronenberg\von Majed\IMARIS\Microfetti\Ki-67 quantification\Data\2d\KGE5319\20241103_KGE-5319_L9_2d_d_Series007.ims
38.6	µm	Surface	Position	196	µm	Surface	Position	10500	µm	Surface	Position	0	158	0	1	RFP	700003	73	RFP	700004	20241103_KGE-5319_L9_2d_d_Series007.ims	S:\AG\AG-Endres\Daten\Gertz-Kronenberg\von Majed\IMARIS\Microfetti\Ki-67 quantification\Data\2d\KGE5319\20241103_KGE-5319_L9_2d_d_Series007.ims
50.9	µm	Surface	Position	158	µm	Surface	Position	10500	µm	Surface	Position	0	159	0	1	RFP	700003	74	RFP	700004	20241103_KGE-5319_L9_2d_d_Series007.ims	S:\AG\AG-Endres\Daten\Gertz-Kronenberg\von Majed\IMARIS\Microfetti\Ki-67 quantification\Data\2d\KGE5319\20241103_KGE-5319_L9_2d_d_Series007.ims
98.3	µm	Surface	Position	39.9	µm	Surface	Position	10500	µm	Surface	Position	0	160	0	1	RFP	700003	75	RFP	700004	20241103_KGE-5319_L9_2d_d_Series007.ims	S:\AG\AG-Endres\Daten\Gertz-Kronenberg\von Majed\IMARIS\Microfetti\Ki-67 quantification\Data\2d\KGE5319\20241103_KGE-5319_L9_2d_d_Series007.ims
343	µm	Surface	Position	290	µm	Surface	Position	10500	µm	Surface	Position	1	161	0	1	RFP	700003	0	RFP	700004	20241103_KGE-5319_L9_2d_e_Series009.ims	S:\AG\AG-Endres\Daten\Gertz-Kronenberg\von Majed\IMARIS\Microfetti\Ki-67 quantification\Data\2d\KGE5319\20241103_KGE-5319_L9_2d_e_Series009.ims
272	µm	Surface	Position	346	µm	Surface	Position	10500	µm	Surface	Position	0	162	0	1	RFP	700003	1	RFP	700004	20241103_KGE-5319_L9_2d_e_Series009.ims	S:\AG\AG-Endres\Daten\Gertz-Kronenberg\von Majed\IMARIS\Microfetti\Ki-67 quantification\Data\2d\KGE5319\20241103_KGE-5319_L9_2d_e_Series009.ims
274	µm	Surface	Position	217	µm	Surface	Position	10500	µm	Surface	Position	1	163	0	1	RFP	700003	2	RFP	700004	20241103_KGE-5319_L9_2d_e_Series009.ims	S:\AG\AG-Endres\Daten\Gertz-Kronenberg\von Majed\IMARIS\Microfetti\Ki-67 quantification\Data\2d\KGE5319\20241103_KGE-5319_L9_2d_e_Series009.ims
186	µm	Surface	Position	246	µm	Surface	Position	10500	µm	Surface	Position	1	164	0	1	RFP	700003	3	RFP	700004	20241103_KGE-5319_L9_2d_e_Series009.ims	S:\AG\AG-Endres\Daten\Gertz-Kronenberg\von Majed\IMARIS\Microfetti\Ki-67 quantification\Data\2d\KGE5319\20241103_KGE-5319_L9_2d_e_Series009.ims
94	µm	Surface	Position	329	µm	Surface	Position	10500	µm	Surface	Position	0	165	0	1	RFP	700003	4	RFP	700004	20241103_KGE-5319_L9_2d_e_Series009.ims	S:\AG\AG-Endres\Daten\Gertz-Kronenberg\von Majed\IMARIS\Microfetti\Ki-67 quantification\Data\2d\KGE5319\20241103_KGE-5319_L9_2d_e_Series009.ims
218	µm	Surface	Position	108	µm	Surface	Position	10500	µm	Surface	Position	1	166	0	1	RFP	700003	5	RFP	700004	20241103_KGE-5319_L9_2d_e_Series009.ims	S:\AG\AG-Endres\Daten\Gertz-Kronenberg\von Majed\IMARIS\Microfetti\Ki-67 quantification\Data\2d\KGE5319\20241103_KGE-5319_L9_2d_e_Series009.ims
92.6	µm	Surface	Position	77.4	µm	Surface	Position	10500	µm	Surface	Position	1	167	0	1	RFP	700003	7	RFP	700004	20241103_KGE-5319_L9_2d_e_Series009.ims	S:\AG\AG-Endres\Daten\Gertz-Kronenberg\von Majed\IMARIS\Microfetti\Ki-67 quantification\Data\2d\KGE5319\20241103_KGE-5319_L9_2d_e_Series009.ims
279	µm	Surface	Position	267	µm	Surface	Position	10400	µm	Surface	Position	0	168	0	1	RFP	700003	1	RFP	700003	20241103_KGE-5320_L9_2d_a_Series001.ims	S:\AG\AG-Endres\Daten\Gertz-Kronenberg\von Majed\IMARIS\Microfetti\Ki-67 quantification\Data\2d\KGE5320\20241103_KGE-5320_L9_2d_a_Series001.ims
196	µm	Surface	Position	265	µm	Surface	Position	10400	µm	Surface	Position	0	169	0	1	RFP	700003	2	RFP	700003	20241103_KGE-5320_L9_2d_a_Series001.ims	S:\AG\AG-Endres\Daten\Gertz-Kronenberg\von Majed\IMARIS\Microfetti\Ki-67 quantification\Data\2d\KGE5320\20241103_KGE-5320_L9_2d_a_Series001.ims
165	µm	Surface	Position	290	µm	Surface	Position	10400	µm	Surface	Position	0	170	0	1	RFP	700003	3	RFP	700003	20241103_KGE-5320_L9_2d_a_Series001.ims	S:\AG\AG-Endres\Daten\Gertz-Kronenberg\von Majed\IMARIS\Microfetti\Ki-67 quantification\Data\2d\KGE5320\20241103_KGE-5320_L9_2d_a_Series001.ims
294	µm	Surface	Position	150	µm	Surface	Position	10400	µm	Surface	Position	0	171	0	1	RFP	700003	5	RFP	700003	20241103_KGE-5320_L9_2d_a_Series001.ims	S:\AG\AG-Endres\Daten\Gertz-Kronenberg\von Majed\IMARIS\Microfetti\Ki-67 quantification\Data\2d\KGE5320\20241103_KGE-5320_L9_2d_a_Series001.ims
348	µm	Surface	Position	83.2	µm	Surface	Position	10400	µm	Surface	Position	0	172	0	1	RFP	700003	6	RFP	700003	20241103_KGE-5320_L9_2d_a_Series001.ims	S:\AG\AG-Endres\Daten\Gertz-Kronenberg\von Majed\IMARIS\Microfetti\Ki-67 quantification\Data\2d\KGE5320\20241103_KGE-5320_L9_2d_a_Series001.ims
113	µm	Surface	Position	278	µm	Surface	Position	10400	µm	Surface	Position	0	173	0	1	RFP	700003	8	RFP	700003	20241103_KGE-5320_L9_2d_a_Series001.ims	S:\AG\AG-Endres\Daten\Gertz-Kronenberg\von Majed\IMARIS\Microfetti\Ki-67 quantification\Data\2d\KGE5320\20241103_KGE-5320_L9_2d_a_Series001.ims
153	µm	Surface	Position	59.5	µm	Surface	Position	10400	µm	Surface	Position	0	174	0	1	RFP	700003	9	RFP	700003	20241103_KGE-5320_L9_2d_a_Series001.ims	S:\AG\AG-Endres\Daten\Gertz-Kronenberg\von Majed\IMARIS\Microfetti\Ki-67 quantification\Data\2d\KGE5320\20241103_KGE-5320_L9_2d_a_Series001.ims
136	µm	Surface	Position	19.6	µm	Surface	Position	10400	µm	Surface	Position	0	175	0	1	RFP	700003	10	RFP	700003	20241103_KGE-5320_L9_2d_a_Series001.ims	S:\AG\AG-Endres\Daten\Gertz-Kronenberg\von Majed\IMARIS\Microfetti\Ki-67 quantification\Data\2d\KGE5320\20241103_KGE-5320_L9_2d_a_Series001.ims
83	µm	Surface	Position	242	µm	Surface	Position	10400	µm	Surface	Position	0	176	0	1	RFP	700003	1	RFP	700003	20241103_KGE-5320_L9_2d_b_Series004.ims	S:\AG\AG-Endres\Daten\Gertz-Kronenberg\von Majed\IMARIS\Microfetti\Ki-67 quantification\Data\2d\KGE5320\20241103_KGE-5320_L9_2d_b_Series004.ims
271	µm	Surface	Position	63	µm	Surface	Position	10400	µm	Surface	Position	0	177	0	1	RFP	700003	2	RFP	700003	20241103_KGE-5320_L9_2d_b_Series004.ims	S:\AG\AG-Endres\Daten\Gertz-Kronenberg\von Majed\IMARIS\Microfetti\Ki-67 quantification\Data\2d\KGE5320\20241103_KGE-5320_L9_2d_b_Series004.ims
63.8	µm	Surface	Position	139	µm	Surface	Position	10400	µm	Surface	Position	0	178	0	1	RFP	700003	3	RFP	700003	20241103_KGE-5320_L9_2d_b_Series004.ims	S:\AG\AG-Endres\Daten\Gertz-Kronenberg\von Majed\IMARIS\Microfetti\Ki-67 quantification\Data\2d\KGE5320\20241103_KGE-5320_L9_2d_b_Series004.ims
210	µm	Surface	Position	16.4	µm	Surface	Position	10400	µm	Surface	Position	0	179	0	1	RFP	700003	4	RFP	700003	20241103_KGE-5320_L9_2d_b_Series004.ims	S:\AG\AG-Endres\Daten\Gertz-Kronenberg\von Majed\IMARIS\Microfetti\Ki-67 quantification\Data\2d\KGE5320\20241103_KGE-5320_L9_2d_b_Series004.ims
65.2	µm	Surface	Position	110	µm	Surface	Position	10400	µm	Surface	Position	0	180	0	1	RFP	700003	5	RFP	700003	20241103_KGE-5320_L9_2d_b_Series004.ims	S:\AG\AG-Endres\Daten\Gertz-Kronenberg\von Majed\IMARIS\Microfetti\Ki-67 quantification\Data\2d\KGE5320\20241103_KGE-5320_L9_2d_b_Series004.ims
202	µm	Surface	Position	345	µm	Surface	Position	10400	µm	Surface	Position	0	181	0	1	RFP	700003	2	RFP	700001	20241103_KGE-5320_L9_2d_c_Series006.ims	S:\AG\AG-Endres\Daten\Gertz-Kronenberg\von Majed\IMARIS\Microfetti\Ki-67 quantification\Data\2d\KGE5320\20241103_KGE-5320_L9_2d_c_Series006.ims
122	µm	Surface	Position	261	µm	Surface	Position	10400	µm	Surface	Position	0	182	0	1	RFP	700003	3	RFP	700001	20241103_KGE-5320_L9_2d_c_Series006.ims	S:\AG\AG-Endres\Daten\Gertz-Kronenberg\von Majed\IMARIS\Microfetti\Ki-67 quantification\Data\2d\KGE5320\20241103_KGE-5320_L9_2d_c_Series006.ims
319	µm	Surface	Position	45.1	µm	Surface	Position	10400	µm	Surface	Position	0	183	0	1	RFP	700003	4	RFP	700001	20241103_KGE-5320_L9_2d_c_Series006.ims	S:\AG\AG-Endres\Daten\Gertz-Kronenberg\von Majed\IMARIS\Microfetti\Ki-67 quantification\Data\2d\KGE5320\20241103_KGE-5320_L9_2d_c_Series006.ims
206	µm	Surface	Position	157	µm	Surface	Position	10400	µm	Surface	Position	0	184	0	1	RFP	700003	5	RFP	700001	20241103_KGE-5320_L9_2d_c_Series006.ims	S:\AG\AG-Endres\Daten\Gertz-Kronenberg\von Majed\IMARIS\Microfetti\Ki-67 quantification\Data\2d\KGE5320\20241103_KGE-5320_L9_2d_c_Series006.ims
113	µm	Surface	Position	256	µm	Surface	Position	10400	µm	Surface	Position	1	185	0	1	RFP	700003	6	RFP	700001	20241103_KGE-5320_L9_2d_c_Series006.ims	S:\AG\AG-Endres\Daten\Gertz-Kronenberg\von Majed\IMARIS\Microfetti\Ki-67 quantification\Data\2d\KGE5320\20241103_KGE-5320_L9_2d_c_Series006.ims
231	µm	Surface	Position	122	µm	Surface	Position	10400	µm	Surface	Position	0	186	0	1	RFP	700003	8	RFP	700001	20241103_KGE-5320_L9_2d_c_Series006.ims	S:\AG\AG-Endres\Daten\Gertz-Kronenberg\von Majed\IMARIS\Microfetti\Ki-67 quantification\Data\2d\KGE5320\20241103_KGE-5320_L9_2d_c_Series006.ims
94.3	µm	Surface	Position	135	µm	Surface	Position	10400	µm	Surface	Position	0	187	0	1	RFP	700003	9	RFP	700001	20241103_KGE-5320_L9_2d_c_Series006.ims	S:\AG\AG-Endres\Daten\Gertz-Kronenberg\von Majed\IMARIS\Microfetti\Ki-67 quantification\Data\2d\KGE5320\20241103_KGE-5320_L9_2d_c_Series006.ims
68.8	µm	Surface	Position	55.1	µm	Surface	Position	10400	µm	Surface	Position	0	188	0	1	RFP	700003	10	RFP	700001	20241103_KGE-5320_L9_2d_c_Series006.ims	S:\AG\AG-Endres\Daten\Gertz-Kronenberg\von Majed\IMARIS\Microfetti\Ki-67 quantification\Data\2d\KGE5320\20241103_KGE-5320_L9_2d_c_Series006.ims
316	µm	Surface	Position	107	µm	Surface	Position	10400	µm	Surface	Position	1	189	0	1	RFP	700003	0	RFP	700003	20241103_KGE-5320_L9_2d_d_Series008.ims	S:\AG\AG-Endres\Daten\Gertz-Kronenberg\von Majed\IMARIS\Microfetti\Ki-67 quantification\Data\2d\KGE5320\20241103_KGE-5320_L9_2d_d_Series008.ims
216	µm	Surface	Position	113	µm	Surface	Position	10400	µm	Surface	Position	0	190	0	1	RFP	700003	1	RFP	700003	20241103_KGE-5320_L9_2d_d_Series008.ims	S:\AG\AG-Endres\Daten\Gertz-Kronenberg\von Majed\IMARIS\Microfetti\Ki-67 quantification\Data\2d\KGE5320\20241103_KGE-5320_L9_2d_d_Series008.ims
120	µm	Surface	Position	136	µm	Surface	Position	10400	µm	Surface	Position	0	191	0	1	RFP	700003	2	RFP	700003	20241103_KGE-5320_L9_2d_d_Series008.ims	S:\AG\AG-Endres\Daten\Gertz-Kronenberg\von Majed\IMARIS\Microfetti\Ki-67 quantification\Data\2d\KGE5320\20241103_KGE-5320_L9_2d_d_Series008.ims
233	µm	Surface	Position	29.1	µm	Surface	Position	10400	µm	Surface	Position	0	192	0	1	RFP	700003	4	RFP	700003	20241103_KGE-5320_L9_2d_d_Series008.ims	S:\AG\AG-Endres\Daten\Gertz-Kronenberg\von Majed\IMARIS\Microfetti\Ki-67 quantification\Data\2d\KGE5320\20241103_KGE-5320_L9_2d_d_Series008.ims
193	µm	Surface	Position	103	µm	Surface	Position	10400	µm	Surface	Position	0	193	0	1	RFP	700003	1	RFP	700003	20241103_KGE-5320_L9_2d_e_Series010.ims	S:\AG\AG-Endres\Daten\Gertz-Kronenberg\von Majed\IMARIS\Microfetti\Ki-67 quantification\Data\2d\KGE5320\20241103_KGE-5320_L9_2d_e_Series010.ims
230	µm	Surface	Position	274	µm	Surface	Position	10400	µm	Surface	Position	1	194	0	1	RFP	700003	2	RFP	700004	20241102_KGE-5321_L9_2d_a_Series001.ims	S:\AG\AG-Endres\Daten\Gertz-Kronenberg\von Majed\IMARIS\Microfetti\Ki-67 quantification\Data\2d\KGE5321\20241102_KGE-5321_L9_2d_a_Series001.ims
287	µm	Surface	Position	119	µm	Surface	Position	10400	µm	Surface	Position	1	195	0	1	RFP	700003	3	RFP	700004	20241102_KGE-5321_L9_2d_a_Series001.ims	S:\AG\AG-Endres\Daten\Gertz-Kronenberg\von Majed\IMARIS\Microfetti\Ki-67 quantification\Data\2d\KGE5321\20241102_KGE-5321_L9_2d_a_Series001.ims
97	µm	Surface	Position	305	µm	Surface	Position	10400	µm	Surface	Position	1	196	0	1	RFP	700003	5	RFP	700004	20241102_KGE-5321_L9_2d_a_Series001.ims	S:\AG\AG-Endres\Daten\Gertz-Kronenberg\von Majed\IMARIS\Microfetti\Ki-67 quantification\Data\2d\KGE5321\20241102_KGE-5321_L9_2d_a_Series001.ims
20.2	µm	Surface	Position	338	µm	Surface	Position	10400	µm	Surface	Position	1	197	0	1	RFP	700003	7	RFP	700004	20241102_KGE-5321_L9_2d_a_Series001.ims	S:\AG\AG-Endres\Daten\Gertz-Kronenberg\von Majed\IMARIS\Microfetti\Ki-67 quantification\Data\2d\KGE5321\20241102_KGE-5321_L9_2d_a_Series001.ims
3.84	µm	Surface	Position	359	µm	Surface	Position	10400	µm	Surface	Position	1	198	0	1	RFP	700003	8	RFP	700004	20241102_KGE-5321_L9_2d_a_Series001.ims	S:\AG\AG-Endres\Daten\Gertz-Kronenberg\von Majed\IMARIS\Microfetti\Ki-67 quantification\Data\2d\KGE5321\20241102_KGE-5321_L9_2d_a_Series001.ims
115	µm	Surface	Position	176	µm	Surface	Position	10400	µm	Surface	Position	0	199	0	1	RFP	700003	9	RFP	700004	20241102_KGE-5321_L9_2d_a_Series001.ims	S:\AG\AG-Endres\Daten\Gertz-Kronenberg\von Majed\IMARIS\Microfetti\Ki-67 quantification\Data\2d\KGE5321\20241102_KGE-5321_L9_2d_a_Series001.ims
238	µm	Surface	Position	46.4	µm	Surface	Position	10400	µm	Surface	Position	0	200	0	1	RFP	700003	10	RFP	700004	20241102_KGE-5321_L9_2d_a_Series001.ims	S:\AG\AG-Endres\Daten\Gertz-Kronenberg\von Majed\IMARIS\Microfetti\Ki-67 quantification\Data\2d\KGE5321\20241102_KGE-5321_L9_2d_a_Series001.ims
153	µm	Surface	Position	143	µm	Surface	Position	10400	µm	Surface	Position	1	201	0	1	RFP	700003	12	RFP	700004	20241102_KGE-5321_L9_2d_a_Series001.ims	S:\AG\AG-Endres\Daten\Gertz-Kronenberg\von Majed\IMARIS\Microfetti\Ki-67 quantification\Data\2d\KGE5321\20241102_KGE-5321_L9_2d_a_Series001.ims
164	µm	Surface	Position	114	µm	Surface	Position	10400	µm	Surface	Position	0	202	0	1	RFP	700003	13	RFP	700004	20241102_KGE-5321_L9_2d_a_Series001.ims	S:\AG\AG-Endres\Daten\Gertz-Kronenberg\von Majed\IMARIS\Microfetti\Ki-67 quantification\Data\2d\KGE5321\20241102_KGE-5321_L9_2d_a_Series001.ims
209	µm	Surface	Position	50.1	µm	Surface	Position	10400	µm	Surface	Position	1	203	0	1	RFP	700003	14	RFP	700004	20241102_KGE-5321_L9_2d_a_Series001.ims	S:\AG\AG-Endres\Daten\Gertz-Kronenberg\von Majed\IMARIS\Microfetti\Ki-67 quantification\Data\2d\KGE5321\20241102_KGE-5321_L9_2d_a_Series001.ims
201	µm	Surface	Position	66.1	µm	Surface	Position	10400	µm	Surface	Position	1	204	0	1	RFP	700003	15	RFP	700004	20241102_KGE-5321_L9_2d_a_Series001.ims	S:\AG\AG-Endres\Daten\Gertz-Kronenberg\von Majed\IMARIS\Microfetti\Ki-67 quantification\Data\2d\KGE5321\20241102_KGE-5321_L9_2d_a_Series001.ims
205	µm	Surface	Position	85.2	µm	Surface	Position	10400	µm	Surface	Position	1	205	0	1	RFP	700003	18	RFP	700004	20241102_KGE-5321_L9_2d_a_Series001.ims	S:\AG\AG-Endres\Daten\Gertz-Kronenberg\von Majed\IMARIS\Microfetti\Ki-67 quantification\Data\2d\KGE5321\20241102_KGE-5321_L9_2d_a_Series001.ims
239	µm	Surface	Position	16.9	µm	Surface	Position	10400	µm	Surface	Position	0	206	0	1	RFP	700003	23	RFP	700004	20241102_KGE-5321_L9_2d_a_Series001.ims	S:\AG\AG-Endres\Daten\Gertz-Kronenberg\von Majed\IMARIS\Microfetti\Ki-67 quantification\Data\2d\KGE5321\20241102_KGE-5321_L9_2d_a_Series001.ims
144	µm	Surface	Position	27.1	µm	Surface	Position	10400	µm	Surface	Position	0	207	0	1	RFP	700003	25	RFP	700004	20241102_KGE-5321_L9_2d_a_Series001.ims	S:\AG\AG-Endres\Daten\Gertz-Kronenberg\von Majed\IMARIS\Microfetti\Ki-67 quantification\Data\2d\KGE5321\20241102_KGE-5321_L9_2d_a_Series001.ims
78	µm	Surface	Position	97.1	µm	Surface	Position	10400	µm	Surface	Position	0	208	0	1	RFP	700003	26	RFP	700004	20241102_KGE-5321_L9_2d_a_Series001.ims	S:\AG\AG-Endres\Daten\Gertz-Kronenberg\von Majed\IMARIS\Microfetti\Ki-67 quantification\Data\2d\KGE5321\20241102_KGE-5321_L9_2d_a_Series001.ims
336	µm	Surface	Position	239	µm	Surface	Position	10400	µm	Surface	Position	0	209	0	1	RFP	700003	55	RFP	700004	20241102_KGE-5321_L9_2d_b_Series003.ims	S:\AG\AG-Endres\Daten\Gertz-Kronenberg\von Majed\IMARIS\Microfetti\Ki-67 quantification\Data\2d\KGE5321\20241102_KGE-5321_L9_2d_b_Series003.ims
311	µm	Surface	Position	215	µm	Surface	Position	10400	µm	Surface	Position	0	210	0	1	RFP	700003	56	RFP	700004	20241102_KGE-5321_L9_2d_b_Series003.ims	S:\AG\AG-Endres\Daten\Gertz-Kronenberg\von Majed\IMARIS\Microfetti\Ki-67 quantification\Data\2d\KGE5321\20241102_KGE-5321_L9_2d_b_Series003.ims
303	µm	Surface	Position	224	µm	Surface	Position	10400	µm	Surface	Position	0	211	0	1	RFP	700003	58	RFP	700004	20241102_KGE-5321_L9_2d_b_Series003.ims	S:\AG\AG-Endres\Daten\Gertz-Kronenberg\von Majed\IMARIS\Microfetti\Ki-67 quantification\Data\2d\KGE5321\20241102_KGE-5321_L9_2d_b_Series003.ims
263	µm	Surface	Position	234	µm	Surface	Position	10400	µm	Surface	Position	0	212	0	1	RFP	700003	59	RFP	700004	20241102_KGE-5321_L9_2d_b_Series003.ims	S:\AG\AG-Endres\Daten\Gertz-Kronenberg\von Majed\IMARIS\Microfetti\Ki-67 quantification\Data\2d\KGE5321\20241102_KGE-5321_L9_2d_b_Series003.ims
189	µm	Surface	Position	321	µm	Surface	Position	10400	µm	Surface	Position	0	213	0	1	RFP	700003	60	RFP	700004	20241102_KGE-5321_L9_2d_b_Series003.ims	S:\AG\AG-Endres\Daten\Gertz-Kronenberg\von Majed\IMARIS\Microfetti\Ki-67 quantification\Data\2d\KGE5321\20241102_KGE-5321_L9_2d_b_Series003.ims
182	µm	Surface	Position	321	µm	Surface	Position	10400	µm	Surface	Position	0	214	0	1	RFP	700003	61	RFP	700004	20241102_KGE-5321_L9_2d_b_Series003.ims	S:\AG\AG-Endres\Daten\Gertz-Kronenberg\von Majed\IMARIS\Microfetti\Ki-67 quantification\Data\2d\KGE5321\20241102_KGE-5321_L9_2d_b_Series003.ims
179	µm	Surface	Position	254	µm	Surface	Position	10400	µm	Surface	Position	0	215	0	1	RFP	700003	63	RFP	700004	20241102_KGE-5321_L9_2d_b_Series003.ims	S:\AG\AG-Endres\Daten\Gertz-Kronenberg\von Majed\IMARIS\Microfetti\Ki-67 quantification\Data\2d\KGE5321\20241102_KGE-5321_L9_2d_b_Series003.ims
119	µm	Surface	Position	309	µm	Surface	Position	10400	µm	Surface	Position	1	216	0	1	RFP	700003	68	RFP	700004	20241102_KGE-5321_L9_2d_b_Series003.ims	S:\AG\AG-Endres\Daten\Gertz-Kronenberg\von Majed\IMARIS\Microfetti\Ki-67 quantification\Data\2d\KGE5321\20241102_KGE-5321_L9_2d_b_Series003.ims
53.4	µm	Surface	Position	321	µm	Surface	Position	10400	µm	Surface	Position	0	217	0	1	RFP	700003	73	RFP	700004	20241102_KGE-5321_L9_2d_b_Series003.ims	S:\AG\AG-Endres\Daten\Gertz-Kronenberg\von Majed\IMARIS\Microfetti\Ki-67 quantification\Data\2d\KGE5321\20241102_KGE-5321_L9_2d_b_Series003.ims
150	µm	Surface	Position	214	µm	Surface	Position	10400	µm	Surface	Position	0	218	0	1	RFP	700003	75	RFP	700004	20241102_KGE-5321_L9_2d_b_Series003.ims	S:\AG\AG-Endres\Daten\Gertz-Kronenberg\von Majed\IMARIS\Microfetti\Ki-67 quantification\Data\2d\KGE5321\20241102_KGE-5321_L9_2d_b_Series003.ims
233	µm	Surface	Position	61.2	µm	Surface	Position	10400	µm	Surface	Position	0	219	0	1	RFP	700003	76	RFP	700004	20241102_KGE-5321_L9_2d_b_Series003.ims	S:\AG\AG-Endres\Daten\Gertz-Kronenberg\von Majed\IMARIS\Microfetti\Ki-67 quantification\Data\2d\KGE5321\20241102_KGE-5321_L9_2d_b_Series003.ims
136	µm	Surface	Position	94.6	µm	Surface	Position	10400	µm	Surface	Position	0	220	0	1	RFP	700003	79	RFP	700004	20241102_KGE-5321_L9_2d_b_Series003.ims	S:\AG\AG-Endres\Daten\Gertz-Kronenberg\von Majed\IMARIS\Microfetti\Ki-67 quantification\Data\2d\KGE5321\20241102_KGE-5321_L9_2d_b_Series003.ims
144	µm	Surface	Position	92.5	µm	Surface	Position	10400	µm	Surface	Position	0	221	0	1	RFP	700003	80	RFP	700004	20241102_KGE-5321_L9_2d_b_Series003.ims	S:\AG\AG-Endres\Daten\Gertz-Kronenberg\von Majed\IMARIS\Microfetti\Ki-67 quantification\Data\2d\KGE5321\20241102_KGE-5321_L9_2d_b_Series003.ims
23.5	µm	Surface	Position	154	µm	Surface	Position	10400	µm	Surface	Position	1	222	0	1	RFP	700003	82	RFP	700004	20241102_KGE-5321_L9_2d_b_Series003.ims	S:\AG\AG-Endres\Daten\Gertz-Kronenberg\von Majed\IMARIS\Microfetti\Ki-67 quantification\Data\2d\KGE5321\20241102_KGE-5321_L9_2d_b_Series003.ims
125	µm	Surface	Position	62	µm	Surface	Position	10400	µm	Surface	Position	1	223	0	1	RFP	700003	84	RFP	700004	20241102_KGE-5321_L9_2d_b_Series003.ims	S:\AG\AG-Endres\Daten\Gertz-Kronenberg\von Majed\IMARIS\Microfetti\Ki-67 quantification\Data\2d\KGE5321\20241102_KGE-5321_L9_2d_b_Series003.ims
27.6	µm	Surface	Position	35.5	µm	Surface	Position	10400	µm	Surface	Position	0	224	0	1	RFP	700003	85	RFP	700004	20241102_KGE-5321_L9_2d_b_Series003.ims	S:\AG\AG-Endres\Daten\Gertz-Kronenberg\von Majed\IMARIS\Microfetti\Ki-67 quantification\Data\2d\KGE5321\20241102_KGE-5321_L9_2d_b_Series003.ims
103	µm	Surface	Position	35.8	µm	Surface	Position	10400	µm	Surface	Position	0	225	0	1	RFP	700003	90	RFP	700004	20241102_KGE-5321_L9_2d_b_Series003.ims	S:\AG\AG-Endres\Daten\Gertz-Kronenberg\von Majed\IMARIS\Microfetti\Ki-67 quantification\Data\2d\KGE5321\20241102_KGE-5321_L9_2d_b_Series003.ims
359	µm	Surface	Position	325	µm	Surface	Position	10400	µm	Surface	Position	0	226	0	1	RFP	700003	0	RFP	700004	20241102_KGE-5321_L9_2d_c_Series005.ims	S:\AG\AG-Endres\Daten\Gertz-Kronenberg\von Majed\IMARIS\Microfetti\Ki-67 quantification\Data\2d\KGE5321\20241102_KGE-5321_L9_2d_c_Series005.ims
344	µm	Surface	Position	266	µm	Surface	Position	10400	µm	Surface	Position	0	227	0	1	RFP	700003	1	RFP	700004	20241102_KGE-5321_L9_2d_c_Series005.ims	S:\AG\AG-Endres\Daten\Gertz-Kronenberg\von Majed\IMARIS\Microfetti\Ki-67 quantification\Data\2d\KGE5321\20241102_KGE-5321_L9_2d_c_Series005.ims
196	µm	Surface	Position	307	µm	Surface	Position	10400	µm	Surface	Position	0	228	0	1	RFP	700003	2	RFP	700004	20241102_KGE-5321_L9_2d_c_Series005.ims	S:\AG\AG-Endres\Daten\Gertz-Kronenberg\von Majed\IMARIS\Microfetti\Ki-67 quantification\Data\2d\KGE5321\20241102_KGE-5321_L9_2d_c_Series005.ims
216	µm	Surface	Position	187	µm	Surface	Position	10400	µm	Surface	Position	0	229	0	1	RFP	700003	3	RFP	700004	20241102_KGE-5321_L9_2d_c_Series005.ims	S:\AG\AG-Endres\Daten\Gertz-Kronenberg\von Majed\IMARIS\Microfetti\Ki-67 quantification\Data\2d\KGE5321\20241102_KGE-5321_L9_2d_c_Series005.ims
44.6	µm	Surface	Position	290	µm	Surface	Position	10400	µm	Surface	Position	0	230	0	1	RFP	700003	4	RFP	700004	20241102_KGE-5321_L9_2d_c_Series005.ims	S:\AG\AG-Endres\Daten\Gertz-Kronenberg\von Majed\IMARIS\Microfetti\Ki-67 quantification\Data\2d\KGE5321\20241102_KGE-5321_L9_2d_c_Series005.ims
227	µm	Surface	Position	88	µm	Surface	Position	10400	µm	Surface	Position	0	231	0	1	RFP	700003	5	RFP	700004	20241102_KGE-5321_L9_2d_c_Series005.ims	S:\AG\AG-Endres\Daten\Gertz-Kronenberg\von Majed\IMARIS\Microfetti\Ki-67 quantification\Data\2d\KGE5321\20241102_KGE-5321_L9_2d_c_Series005.ims
79.7	µm	Surface	Position	10.1	µm	Surface	Position	10400	µm	Surface	Position	0	232	0	1	RFP	700003	6	RFP	700004	20241102_KGE-5321_L9_2d_c_Series005.ims	S:\AG\AG-Endres\Daten\Gertz-Kronenberg\von Majed\IMARIS\Microfetti\Ki-67 quantification\Data\2d\KGE5321\20241102_KGE-5321_L9_2d_c_Series005.ims
28	µm	Surface	Position	79.2	µm	Surface	Position	10400	µm	Surface	Position	0	233	0	1	RFP	700003	7	RFP	700004	20241102_KGE-5321_L9_2d_c_Series005.ims	S:\AG\AG-Endres\Daten\Gertz-Kronenberg\von Majed\IMARIS\Microfetti\Ki-67 quantification\Data\2d\KGE5321\20241102_KGE-5321_L9_2d_c_Series005.ims
330	µm	Surface	Position	326	µm	Surface	Position	10400	µm	Surface	Position	0	234	0	1	RFP	700003	26	RFP	700004	20241102_KGE-5321_L9_2d_d_Series007.ims	S:\AG\AG-Endres\Daten\Gertz-Kronenberg\von Majed\IMARIS\Microfetti\Ki-67 quantification\Data\2d\KGE5321\20241102_KGE-5321_L9_2d_d_Series007.ims
292	µm	Surface	Position	341	µm	Surface	Position	10400	µm	Surface	Position	1	235	0	1	RFP	700003	27	RFP	700004	20241102_KGE-5321_L9_2d_d_Series007.ims	S:\AG\AG-Endres\Daten\Gertz-Kronenberg\von Majed\IMARIS\Microfetti\Ki-67 quantification\Data\2d\KGE5321\20241102_KGE-5321_L9_2d_d_Series007.ims
77.5	µm	Surface	Position	359	µm	Surface	Position	10400	µm	Surface	Position	0	236	0	1	RFP	700003	35	RFP	700004	20241102_KGE-5321_L9_2d_d_Series007.ims	S:\AG\AG-Endres\Daten\Gertz-Kronenberg\von Majed\IMARIS\Microfetti\Ki-67 quantification\Data\2d\KGE5321\20241102_KGE-5321_L9_2d_d_Series007.ims
189	µm	Surface	Position	251	µm	Surface	Position	10400	µm	Surface	Position	0	237	0	1	RFP	700003	36	RFP	700004	20241102_KGE-5321_L9_2d_d_Series007.ims	S:\AG\AG-Endres\Daten\Gertz-Kronenberg\von Majed\IMARIS\Microfetti\Ki-67 quantification\Data\2d\KGE5321\20241102_KGE-5321_L9_2d_d_Series007.ims
233	µm	Surface	Position	178	µm	Surface	Position	10400	µm	Surface	Position	0	238	0	1	RFP	700003	37	RFP	700004	20241102_KGE-5321_L9_2d_d_Series007.ims	S:\AG\AG-Endres\Daten\Gertz-Kronenberg\von Majed\IMARIS\Microfetti\Ki-67 quantification\Data\2d\KGE5321\20241102_KGE-5321_L9_2d_d_Series007.ims
274	µm	Surface	Position	69.1	µm	Surface	Position	10400	µm	Surface	Position	0	239	0	1	RFP	700003	40	RFP	700004	20241102_KGE-5321_L9_2d_d_Series007.ims	S:\AG\AG-Endres\Daten\Gertz-Kronenberg\von Majed\IMARIS\Microfetti\Ki-67 quantification\Data\2d\KGE5321\20241102_KGE-5321_L9_2d_d_Series007.ims
200	µm	Surface	Position	90.8	µm	Surface	Position	10400	µm	Surface	Position	0	240	0	1	RFP	700003	44	RFP	700004	20241102_KGE-5321_L9_2d_d_Series007.ims	S:\AG\AG-Endres\Daten\Gertz-Kronenberg\von Majed\IMARIS\Microfetti\Ki-67 quantification\Data\2d\KGE5321\20241102_KGE-5321_L9_2d_d_Series007.ims
77.7	µm	Surface	Position	177	µm	Surface	Position	10400	µm	Surface	Position	0	241	0	1	RFP	700003	47	RFP	700004	20241102_KGE-5321_L9_2d_d_Series007.ims	S:\AG\AG-Endres\Daten\Gertz-Kronenberg\von Majed\IMARIS\Microfetti\Ki-67 quantification\Data\2d\KGE5321\20241102_KGE-5321_L9_2d_d_Series007.ims
108	µm	Surface	Position	98.2	µm	Surface	Position	10400	µm	Surface	Position	0	242	0	1	RFP	700003	52	RFP	700004	20241102_KGE-5321_L9_2d_d_Series007.ims	S:\AG\AG-Endres\Daten\Gertz-Kronenberg\von Majed\IMARIS\Microfetti\Ki-67 quantification\Data\2d\KGE5321\20241102_KGE-5321_L9_2d_d_Series007.ims
19	µm	Surface	Position	71.7	µm	Surface	Position	10400	µm	Surface	Position	0	243	0	1	RFP	700003	54	RFP	700004	20241102_KGE-5321_L9_2d_d_Series007.ims	S:\AG\AG-Endres\Daten\Gertz-Kronenberg\von Majed\IMARIS\Microfetti\Ki-67 quantification\Data\2d\KGE5321\20241102_KGE-5321_L9_2d_d_Series007.ims
322	µm	Surface	Position	328	µm	Surface	Position	10400	µm	Surface	Position	0	244	0	1	RFP	700003	0	RFP	700004	20241102_KGE-5321_L9_2d_e_Series009.ims	S:\AG\AG-Endres\Daten\Gertz-Kronenberg\von Majed\IMARIS\Microfetti\Ki-67 quantification\Data\2d\KGE5321\20241102_KGE-5321_L9_2d_e_Series009.ims
275	µm	Surface	Position	114	µm	Surface	Position	10400	µm	Surface	Position	0	245	0	1	RFP	700003	1	RFP	700004	20241102_KGE-5321_L9_2d_e_Series009.ims	S:\AG\AG-Endres\Daten\Gertz-Kronenberg\von Majed\IMARIS\Microfetti\Ki-67 quantification\Data\2d\KGE5321\20241102_KGE-5321_L9_2d_e_Series009.ims
19.2	µm	Surface	Position	320	µm	Surface	Position	10400	µm	Surface	Position	0	246	0	1	RFP	700003	2	RFP	700004	20241102_KGE-5321_L9_2d_e_Series009.ims	S:\AG\AG-Endres\Daten\Gertz-Kronenberg\von Majed\IMARIS\Microfetti\Ki-67 quantification\Data\2d\KGE5321\20241102_KGE-5321_L9_2d_e_Series009.ims
259	µm	Surface	Position	57.5	µm	Surface	Position	10400	µm	Surface	Position	1	247	0	1	RFP	700003	3	RFP	700004	20241102_KGE-5321_L9_2d_e_Series009.ims	S:\AG\AG-Endres\Daten\Gertz-Kronenberg\von Majed\IMARIS\Microfetti\Ki-67 quantification\Data\2d\KGE5321\20241102_KGE-5321_L9_2d_e_Series009.ims
61.9	µm	Surface	Position	212	µm	Surface	Position	10400	µm	Surface	Position	0	248	0	1	RFP	700003	4	RFP	700004	20241102_KGE-5321_L9_2d_e_Series009.ims	S:\AG\AG-Endres\Daten\Gertz-Kronenberg\von Majed\IMARIS\Microfetti\Ki-67 quantification\Data\2d\KGE5321\20241102_KGE-5321_L9_2d_e_Series009.ims
116	µm	Surface	Position	40.9	µm	Surface	Position	10400	µm	Surface	Position	0	249	0	1	RFP	700003	5	RFP	700004	20241102_KGE-5321_L9_2d_e_Series009.ims	S:\AG\AG-Endres\Daten\Gertz-Kronenberg\von Majed\IMARIS\Microfetti\Ki-67 quantification\Data\2d\KGE5321\20241102_KGE-5321_L9_2d_e_Series009.ims
187	µm	Surface	Position	333	µm	Surface	Position	10400	µm	Surface	Position	0	0	0	1	YFP	700004	0	YFP	700003	20241103_KGE-4460_L6_2d_a_Series001.ims	S:\AG\AG-Endres\Daten\Gertz-Kronenberg\von Majed\IMARIS\Microfetti\Ki-67 quantification\Data\2d\KGE4460\20241103_KGE-4460_L6_2d_a_Series001.ims
149	µm	Surface	Position	239	µm	Surface	Position	10400	µm	Surface	Position	0	5	0	1	YFP	700004	5	YFP	700003	20241103_KGE-4460_L6_2d_a_Series001.ims	S:\AG\AG-Endres\Daten\Gertz-Kronenberg\von Majed\IMARIS\Microfetti\Ki-67 quantification\Data\2d\KGE4460\20241103_KGE-4460_L6_2d_a_Series001.ims
284	µm	Surface	Position	37.3	µm	Surface	Position	10400	µm	Surface	Position	1	7	0	1	YFP	700004	7	YFP	700003	20241103_KGE-4460_L6_2d_a_Series001.ims	S:\AG\AG-Endres\Daten\Gertz-Kronenberg\von Majed\IMARIS\Microfetti\Ki-67 quantification\Data\2d\KGE4460\20241103_KGE-4460_L6_2d_a_Series001.ims
321	µm	Surface	Position	8.26	µm	Surface	Position	10400	µm	Surface	Position	1	8	0	1	YFP	700004	8	YFP	700003	20241103_KGE-4460_L6_2d_a_Series001.ims	S:\AG\AG-Endres\Daten\Gertz-Kronenberg\von Majed\IMARIS\Microfetti\Ki-67 quantification\Data\2d\KGE4460\20241103_KGE-4460_L6_2d_a_Series001.ims
217	µm	Surface	Position	76.1	µm	Surface	Position	10400	µm	Surface	Position	1	10	0	1	YFP	700004	10	YFP	700003	20241103_KGE-4460_L6_2d_a_Series001.ims	S:\AG\AG-Endres\Daten\Gertz-Kronenberg\von Majed\IMARIS\Microfetti\Ki-67 quantification\Data\2d\KGE4460\20241103_KGE-4460_L6_2d_a_Series001.ims
318	µm	Surface	Position	24.9	µm	Surface	Position	10400	µm	Surface	Position	1	11	0	1	YFP	700004	11	YFP	700003	20241103_KGE-4460_L6_2d_a_Series001.ims	S:\AG\AG-Endres\Daten\Gertz-Kronenberg\von Majed\IMARIS\Microfetti\Ki-67 quantification\Data\2d\KGE4460\20241103_KGE-4460_L6_2d_a_Series001.ims
203	µm	Surface	Position	320	µm	Surface	Position	10400	µm	Surface	Position	1	12	0	1	YFP	700004	0	YFP	700003	20241103_KGE-4460_L6_2d_b_Series003.ims	S:\AG\AG-Endres\Daten\Gertz-Kronenberg\von Majed\IMARIS\Microfetti\Ki-67 quantification\Data\2d\KGE4460\20241103_KGE-4460_L6_2d_b_Series003.ims
127	µm	Surface	Position	110	µm	Surface	Position	10400	µm	Surface	Position	0	13	0	1	YFP	700004	6	YFP	700003	20241103_KGE-4460_L6_2d_b_Series003.ims	S:\AG\AG-Endres\Daten\Gertz-Kronenberg\von Majed\IMARIS\Microfetti\Ki-67 quantification\Data\2d\KGE4460\20241103_KGE-4460_L6_2d_b_Series003.ims
47.1	µm	Surface	Position	178	µm	Surface	Position	10400	µm	Surface	Position	0	14	0	1	YFP	700004	0	YFP	700003	20241103_KGE-4460_L6_2d_c_Series005.ims	S:\AG\AG-Endres\Daten\Gertz-Kronenberg\von Majed\IMARIS\Microfetti\Ki-67 quantification\Data\2d\KGE4460\20241103_KGE-4460_L6_2d_c_Series005.ims
359	µm	Surface	Position	232	µm	Surface	Position	10400	µm	Surface	Position	0	15	0	1	YFP	700004	1	YFP	700003	20241103_KGE-4460_L6_2d_d_Series007.ims	S:\AG\AG-Endres\Daten\Gertz-Kronenberg\von Majed\IMARIS\Microfetti\Ki-67 quantification\Data\2d\KGE4460\20241103_KGE-4460_L6_2d_d_Series007.ims
169	µm	Surface	Position	275	µm	Surface	Position	10400	µm	Surface	Position	0	16	0	1	YFP	700004	2	YFP	700003	20241103_KGE-4460_L6_2d_d_Series007.ims	S:\AG\AG-Endres\Daten\Gertz-Kronenberg\von Majed\IMARIS\Microfetti\Ki-67 quantification\Data\2d\KGE4460\20241103_KGE-4460_L6_2d_d_Series007.ims
244	µm	Surface	Position	264	µm	Surface	Position	10400	µm	Surface	Position	0	17	0	1	YFP	700004	3	YFP	700003	20241103_KGE-4460_L6_2d_d_Series007.ims	S:\AG\AG-Endres\Daten\Gertz-Kronenberg\von Majed\IMARIS\Microfetti\Ki-67 quantification\Data\2d\KGE4460\20241103_KGE-4460_L6_2d_d_Series007.ims
130	µm	Surface	Position	268	µm	Surface	Position	10400	µm	Surface	Position	0	18	0	1	YFP	700004	4	YFP	700003	20241103_KGE-4460_L6_2d_d_Series007.ims	S:\AG\AG-Endres\Daten\Gertz-Kronenberg\von Majed\IMARIS\Microfetti\Ki-67 quantification\Data\2d\KGE4460\20241103_KGE-4460_L6_2d_d_Series007.ims
361	µm	Surface	Position	262	µm	Surface	Position	10400	µm	Surface	Position	1	19	0	1	YFP	700004	0	YFP	700003	20241103_KGE-4460_L6_2d_e_Series009.ims	S:\AG\AG-Endres\Daten\Gertz-Kronenberg\von Majed\IMARIS\Microfetti\Ki-67 quantification\Data\2d\KGE4460\20241103_KGE-4460_L6_2d_e_Series009.ims
365	µm	Surface	Position	277	µm	Surface	Position	10400	µm	Surface	Position	1	20	0	1	YFP	700004	1	YFP	700003	20241103_KGE-4460_L6_2d_e_Series009.ims	S:\AG\AG-Endres\Daten\Gertz-Kronenberg\von Majed\IMARIS\Microfetti\Ki-67 quantification\Data\2d\KGE4460\20241103_KGE-4460_L6_2d_e_Series009.ims
26.4	µm	Surface	Position	346	µm	Surface	Position	10400	µm	Surface	Position	1	21	0	1	YFP	700004	2	YFP	700003	20241103_KGE-4460_L6_2d_e_Series009.ims	S:\AG\AG-Endres\Daten\Gertz-Kronenberg\von Majed\IMARIS\Microfetti\Ki-67 quantification\Data\2d\KGE4460\20241103_KGE-4460_L6_2d_e_Series009.ims
218	µm	Surface	Position	31.7	µm	Surface	Position	10400	µm	Surface	Position	0	22	0	1	YFP	700004	3	YFP	700003	20241103_KGE-4460_L6_2d_e_Series009.ims	S:\AG\AG-Endres\Daten\Gertz-Kronenberg\von Majed\IMARIS\Microfetti\Ki-67 quantification\Data\2d\KGE4460\20241103_KGE-4460_L6_2d_e_Series009.ims
174	µm	Surface	Position	31.4	µm	Surface	Position	10400	µm	Surface	Position	0	23	0	1	YFP	700004	4	YFP	700003	20241103_KGE-4460_L6_2d_e_Series009.ims	S:\AG\AG-Endres\Daten\Gertz-Kronenberg\von Majed\IMARIS\Microfetti\Ki-67 quantification\Data\2d\KGE4460\20241103_KGE-4460_L6_2d_e_Series009.ims
138	µm	Surface	Position	361	µm	Surface	Position	10500	µm	Surface	Position	1	24	0	1	YFP	700004	16	YFP	700003	20241102_kge-4590_l6_2d_a_series001_a_series001.ims	S:\AG\AG-Endres\Daten\Gertz-Kronenberg\von Majed\IMARIS\Microfetti\Ki-67 quantification\Data\2d\KGE4590\20241102_kge-4590_l6_2d_a_series001_a_series001.ims
158	µm	Surface	Position	249	µm	Surface	Position	10500	µm	Surface	Position	1	25	0	1	YFP	700004	17	YFP	700003	20241102_kge-4590_l6_2d_a_series001_a_series001.ims	S:\AG\AG-Endres\Daten\Gertz-Kronenberg\von Majed\IMARIS\Microfetti\Ki-67 quantification\Data\2d\KGE4590\20241102_kge-4590_l6_2d_a_series001_a_series001.ims
44.9	µm	Surface	Position	194	µm	Surface	Position	10500	µm	Surface	Position	1	26	0	1	YFP	700004	23	YFP	700003	20241102_kge-4590_l6_2d_a_series001_a_series001.ims	S:\AG\AG-Endres\Daten\Gertz-Kronenberg\von Majed\IMARIS\Microfetti\Ki-67 quantification\Data\2d\KGE4590\20241102_kge-4590_l6_2d_a_series001_a_series001.ims
87.2	µm	Surface	Position	139	µm	Surface	Position	10500	µm	Surface	Position	1	27	0	1	YFP	700004	24	YFP	700003	20241102_kge-4590_l6_2d_a_series001_a_series001.ims	S:\AG\AG-Endres\Daten\Gertz-Kronenberg\von Majed\IMARIS\Microfetti\Ki-67 quantification\Data\2d\KGE4590\20241102_kge-4590_l6_2d_a_series001_a_series001.ims
338	µm	Surface	Position	343	µm	Surface	Position	10500	µm	Surface	Position	1	28	0	1	YFP	700004	0	YFP	700003	20241102_kge-4590_l6_2d_a_series001_b_series004.ims	S:\AG\AG-Endres\Daten\Gertz-Kronenberg\von Majed\IMARIS\Microfetti\Ki-67 quantification\Data\2d\KGE4590\20241102_kge-4590_l6_2d_a_series001_b_series004.ims
279	µm	Surface	Position	322	µm	Surface	Position	10500	µm	Surface	Position	1	29	0	1	YFP	700004	1	YFP	700003	20241102_kge-4590_l6_2d_a_series001_b_series004.ims	S:\AG\AG-Endres\Daten\Gertz-Kronenberg\von Majed\IMARIS\Microfetti\Ki-67 quantification\Data\2d\KGE4590\20241102_kge-4590_l6_2d_a_series001_b_series004.ims
142	µm	Surface	Position	43.6	µm	Surface	Position	10500	µm	Surface	Position	1	30	0	1	YFP	700004	3	YFP	700003	20241102_kge-4590_l6_2d_a_series001_b_series004.ims	S:\AG\AG-Endres\Daten\Gertz-Kronenberg\von Majed\IMARIS\Microfetti\Ki-67 quantification\Data\2d\KGE4590\20241102_kge-4590_l6_2d_a_series001_b_series004.ims
79.6	µm	Surface	Position	293	µm	Surface	Position	10500	µm	Surface	Position	0	31	0	1	YFP	700004	0	YFP	700003	20241102_kge-4590_l6_2d_a_series001_c_series006.ims	S:\AG\AG-Endres\Daten\Gertz-Kronenberg\von Majed\IMARIS\Microfetti\Ki-67 quantification\Data\2d\KGE4590\20241102_kge-4590_l6_2d_a_series001_c_series006.ims
168	µm	Surface	Position	159	µm	Surface	Position	10500	µm	Surface	Position	1	32	0	1	YFP	700004	1	YFP	700003	20241102_kge-4590_l6_2d_a_series001_c_series006.ims	S:\AG\AG-Endres\Daten\Gertz-Kronenberg\von Majed\IMARIS\Microfetti\Ki-67 quantification\Data\2d\KGE4590\20241102_kge-4590_l6_2d_a_series001_c_series006.ims
189	µm	Surface	Position	174	µm	Surface	Position	10500	µm	Surface	Position	0	33	0	1	YFP	700004	5	YFP	700003	20241102_kge-4590_l6_2d_a_series001_d_series009.ims	S:\AG\AG-Endres\Daten\Gertz-Kronenberg\von Majed\IMARIS\Microfetti\Ki-67 quantification\Data\2d\KGE4590\20241102_kge-4590_l6_2d_a_series001_d_series009.ims
180	µm	Surface	Position	161	µm	Surface	Position	10500	µm	Surface	Position	0	34	0	1	YFP	700004	6	YFP	700003	20241102_kge-4590_l6_2d_a_series001_d_series009.ims	S:\AG\AG-Endres\Daten\Gertz-Kronenberg\von Majed\IMARIS\Microfetti\Ki-67 quantification\Data\2d\KGE4590\20241102_kge-4590_l6_2d_a_series001_d_series009.ims
74	µm	Surface	Position	194	µm	Surface	Position	10500	µm	Surface	Position	1	35	0	1	YFP	700004	7	YFP	700003	20241102_kge-4590_l6_2d_a_series001_d_series009.ims	S:\AG\AG-Endres\Daten\Gertz-Kronenberg\von Majed\IMARIS\Microfetti\Ki-67 quantification\Data\2d\KGE4590\20241102_kge-4590_l6_2d_a_series001_d_series009.ims
22.5	µm	Surface	Position	156	µm	Surface	Position	10500	µm	Surface	Position	0	36	0	1	YFP	700004	8	YFP	700003	20241102_kge-4590_l6_2d_a_series001_d_series009.ims	S:\AG\AG-Endres\Daten\Gertz-Kronenberg\von Majed\IMARIS\Microfetti\Ki-67 quantification\Data\2d\KGE4590\20241102_kge-4590_l6_2d_a_series001_d_series009.ims
264	µm	Surface	Position	288	µm	Surface	Position	10500	µm	Surface	Position	0	37	0	1	YFP	700004	0	YFP	700003	20241102_kge-4590_l6_2d_a_series001_e_series011.ims	S:\AG\AG-Endres\Daten\Gertz-Kronenberg\von Majed\IMARIS\Microfetti\Ki-67 quantification\Data\2d\KGE4590\20241102_kge-4590_l6_2d_a_series001_e_series011.ims
357	µm	Surface	Position	117	µm	Surface	Position	10500	µm	Surface	Position	0	38	0	1	YFP	700004	1	YFP	700003	20241102_kge-4590_l6_2d_a_series001_e_series011.ims	S:\AG\AG-Endres\Daten\Gertz-Kronenberg\von Majed\IMARIS\Microfetti\Ki-67 quantification\Data\2d\KGE4590\20241102_kge-4590_l6_2d_a_series001_e_series011.ims
210	µm	Surface	Position	112	µm	Surface	Position	10500	µm	Surface	Position	0	39	0	1	YFP	700004	5	YFP	700003	20241102_kge-4590_l6_2d_a_series001_e_series011.ims	S:\AG\AG-Endres\Daten\Gertz-Kronenberg\von Majed\IMARIS\Microfetti\Ki-67 quantification\Data\2d\KGE4590\20241102_kge-4590_l6_2d_a_series001_e_series011.ims
84	µm	Surface	Position	41	µm	Surface	Position	10500	µm	Surface	Position	0	40	0	1	YFP	700004	8	YFP	700003	20241102_kge-4590_l6_2d_a_series001_e_series011.ims	S:\AG\AG-Endres\Daten\Gertz-Kronenberg\von Majed\IMARIS\Microfetti\Ki-67 quantification\Data\2d\KGE4590\20241102_kge-4590_l6_2d_a_series001_e_series011.ims
289	µm	Surface	Position	292	µm	Surface	Position	10500	µm	Surface	Position	1	41	0	1	YFP	700004	0	YFP	700003	20241102_kge-4590_l6_2d_a_series001_f_series013.ims	S:\AG\AG-Endres\Daten\Gertz-Kronenberg\von Majed\IMARIS\Microfetti\Ki-67 quantification\Data\2d\KGE4590\20241102_kge-4590_l6_2d_a_series001_f_series013.ims
257	µm	Surface	Position	295	µm	Surface	Position	10500	µm	Surface	Position	1	42	0	1	YFP	700004	1	YFP	700003	20241102_kge-4590_l6_2d_a_series001_f_series013.ims	S:\AG\AG-Endres\Daten\Gertz-Kronenberg\von Majed\IMARIS\Microfetti\Ki-67 quantification\Data\2d\KGE4590\20241102_kge-4590_l6_2d_a_series001_f_series013.ims
299	µm	Surface	Position	157	µm	Surface	Position	10500	µm	Surface	Position	1	43	0	1	YFP	700004	2	YFP	700003	20241102_kge-4590_l6_2d_a_series001_f_series013.ims	S:\AG\AG-Endres\Daten\Gertz-Kronenberg\von Majed\IMARIS\Microfetti\Ki-67 quantification\Data\2d\KGE4590\20241102_kge-4590_l6_2d_a_series001_f_series013.ims
203	µm	Surface	Position	210	µm	Surface	Position	10500	µm	Surface	Position	0	44	0	1	YFP	700004	5	YFP	700003	20241102_kge-4590_l6_2d_a_series001_f_series013.ims	S:\AG\AG-Endres\Daten\Gertz-Kronenberg\von Majed\IMARIS\Microfetti\Ki-67 quantification\Data\2d\KGE4590\20241102_kge-4590_l6_2d_a_series001_f_series013.ims
21.5	µm	Surface	Position	350	µm	Surface	Position	10500	µm	Surface	Position	1	45	0	1	YFP	700004	7	YFP	700003	20241102_kge-4590_l6_2d_a_series001_f_series013.ims	S:\AG\AG-Endres\Daten\Gertz-Kronenberg\von Majed\IMARIS\Microfetti\Ki-67 quantification\Data\2d\KGE4590\20241102_kge-4590_l6_2d_a_series001_f_series013.ims
6.81	µm	Surface	Position	330	µm	Surface	Position	10500	µm	Surface	Position	1	46	0	1	YFP	700004	8	YFP	700003	20241102_kge-4590_l6_2d_a_series001_f_series013.ims	S:\AG\AG-Endres\Daten\Gertz-Kronenberg\von Majed\IMARIS\Microfetti\Ki-67 quantification\Data\2d\KGE4590\20241102_kge-4590_l6_2d_a_series001_f_series013.ims
121	µm	Surface	Position	241	µm	Surface	Position	10400	µm	Surface	Position	0	47	0	1	YFP	700004	1	YFP	700003	20241102_KGE-4593_L6_2d_a_Series001.ims	S:\AG\AG-Endres\Daten\Gertz-Kronenberg\von Majed\IMARIS\Microfetti\Ki-67 quantification\Data\2d\KGE4593\20241102_KGE-4593_L6_2d_a_Series001.ims
206	µm	Surface	Position	167	µm	Surface	Position	10400	µm	Surface	Position	1	48	0	1	YFP	700004	2	YFP	700003	20241102_KGE-4593_L6_2d_a_Series001.ims	S:\AG\AG-Endres\Daten\Gertz-Kronenberg\von Majed\IMARIS\Microfetti\Ki-67 quantification\Data\2d\KGE4593\20241102_KGE-4593_L6_2d_a_Series001.ims
152	µm	Surface	Position	139	µm	Surface	Position	10400	µm	Surface	Position	0	49	0	1	YFP	700004	3	YFP	700003	20241102_KGE-4593_L6_2d_a_Series001.ims	S:\AG\AG-Endres\Daten\Gertz-Kronenberg\von Majed\IMARIS\Microfetti\Ki-67 quantification\Data\2d\KGE4593\20241102_KGE-4593_L6_2d_a_Series001.ims
225	µm	Surface	Position	95	µm	Surface	Position	10400	µm	Surface	Position	1	50	0	1	YFP	700004	4	YFP	700003	20241102_KGE-4593_L6_2d_a_Series001.ims	S:\AG\AG-Endres\Daten\Gertz-Kronenberg\von Majed\IMARIS\Microfetti\Ki-67 quantification\Data\2d\KGE4593\20241102_KGE-4593_L6_2d_a_Series001.ims
262	µm	Surface	Position	335	µm	Surface	Position	10400	µm	Surface	Position	1	51	0	1	YFP	700004	13	YFP	700003	20241102_KGE-4593_L6_2d_b_Series003.ims	S:\AG\AG-Endres\Daten\Gertz-Kronenberg\von Majed\IMARIS\Microfetti\Ki-67 quantification\Data\2d\KGE4593\20241102_KGE-4593_L6_2d_b_Series003.ims
144	µm	Surface	Position	295	µm	Surface	Position	10300	µm	Surface	Position	1	52	0	1	YFP	700004	18	YFP	700003	20241102_KGE-4593_L6_2d_b_Series003.ims	S:\AG\AG-Endres\Daten\Gertz-Kronenberg\von Majed\IMARIS\Microfetti\Ki-67 quantification\Data\2d\KGE4593\20241102_KGE-4593_L6_2d_b_Series003.ims
141	µm	Surface	Position	283	µm	Surface	Position	10300	µm	Surface	Position	1	53	0	1	YFP	700004	21	YFP	700003	20241102_KGE-4593_L6_2d_b_Series003.ims	S:\AG\AG-Endres\Daten\Gertz-Kronenberg\von Majed\IMARIS\Microfetti\Ki-67 quantification\Data\2d\KGE4593\20241102_KGE-4593_L6_2d_b_Series003.ims
182	µm	Surface	Position	92.4	µm	Surface	Position	10300	µm	Surface	Position	1	54	0	1	YFP	700004	26	YFP	700003	20241102_KGE-4593_L6_2d_b_Series003.ims	S:\AG\AG-Endres\Daten\Gertz-Kronenberg\von Majed\IMARIS\Microfetti\Ki-67 quantification\Data\2d\KGE4593\20241102_KGE-4593_L6_2d_b_Series003.ims
67.3	µm	Surface	Position	175	µm	Surface	Position	10400	µm	Surface	Position	0	55	0	1	YFP	700004	28	YFP	700003	20241102_KGE-4593_L6_2d_b_Series003.ims	S:\AG\AG-Endres\Daten\Gertz-Kronenberg\von Majed\IMARIS\Microfetti\Ki-67 quantification\Data\2d\KGE4593\20241102_KGE-4593_L6_2d_b_Series003.ims
94.5	µm	Surface	Position	36.8	µm	Surface	Position	10400	µm	Surface	Position	1	56	0	1	YFP	700004	33	YFP	700003	20241102_KGE-4593_L6_2d_b_Series003.ims	S:\AG\AG-Endres\Daten\Gertz-Kronenberg\von Majed\IMARIS\Microfetti\Ki-67 quantification\Data\2d\KGE4593\20241102_KGE-4593_L6_2d_b_Series003.ims
100	µm	Surface	Position	260	µm	Surface	Position	10300	µm	Surface	Position	0	57	0	1	YFP	700004	0	YFP	700003	20241102_KGE-4593_L6_2d_c_Series005.ims	S:\AG\AG-Endres\Daten\Gertz-Kronenberg\von Majed\IMARIS\Microfetti\Ki-67 quantification\Data\2d\KGE4593\20241102_KGE-4593_L6_2d_c_Series005.ims
40.9	µm	Surface	Position	118	µm	Surface	Position	10300	µm	Surface	Position	0	58	0	1	YFP	700004	1	YFP	700003	20241102_KGE-4593_L6_2d_c_Series005.ims	S:\AG\AG-Endres\Daten\Gertz-Kronenberg\von Majed\IMARIS\Microfetti\Ki-67 quantification\Data\2d\KGE4593\20241102_KGE-4593_L6_2d_c_Series005.ims
312	µm	Surface	Position	206	µm	Surface	Position	10300	µm	Surface	Position	0	59	0	1	YFP	700004	6	YFP	700003	20241102_KGE-4593_L6_2d_d_Series009.ims	S:\AG\AG-Endres\Daten\Gertz-Kronenberg\von Majed\IMARIS\Microfetti\Ki-67 quantification\Data\2d\KGE4593\20241102_KGE-4593_L6_2d_d_Series009.ims
154	µm	Surface	Position	343	µm	Surface	Position	10400	µm	Surface	Position	0	60	0	1	YFP	700004	7	YFP	700003	20241102_KGE-4593_L6_2d_d_Series009.ims	S:\AG\AG-Endres\Daten\Gertz-Kronenberg\von Majed\IMARIS\Microfetti\Ki-67 quantification\Data\2d\KGE4593\20241102_KGE-4593_L6_2d_d_Series009.ims
130	µm	Surface	Position	333	µm	Surface	Position	10300	µm	Surface	Position	1	61	0	1	YFP	700004	8	YFP	700003	20241102_KGE-4593_L6_2d_d_Series009.ims	S:\AG\AG-Endres\Daten\Gertz-Kronenberg\von Majed\IMARIS\Microfetti\Ki-67 quantification\Data\2d\KGE4593\20241102_KGE-4593_L6_2d_d_Series009.ims
112	µm	Surface	Position	207	µm	Surface	Position	10400	µm	Surface	Position	0	62	0	1	YFP	700004	11	YFP	700003	20241102_KGE-4593_L6_2d_d_Series009.ims	S:\AG\AG-Endres\Daten\Gertz-Kronenberg\von Majed\IMARIS\Microfetti\Ki-67 quantification\Data\2d\KGE4593\20241102_KGE-4593_L6_2d_d_Series009.ims
365	µm	Surface	Position	274	µm	Surface	Position	10300	µm	Surface	Position	0	63	0	1	YFP	700004	0	YFP	700003	20241102_KGE-4593_L6_2d_e_Series013.ims	S:\AG\AG-Endres\Daten\Gertz-Kronenberg\von Majed\IMARIS\Microfetti\Ki-67 quantification\Data\2d\KGE4593\20241102_KGE-4593_L6_2d_e_Series013.ims
173	µm	Surface	Position	332	µm	Surface	Position	10300	µm	Surface	Position	0	64	0	1	YFP	700004	2	YFP	700003	20241102_KGE-4593_L6_2d_e_Series013.ims	S:\AG\AG-Endres\Daten\Gertz-Kronenberg\von Majed\IMARIS\Microfetti\Ki-67 quantification\Data\2d\KGE4593\20241102_KGE-4593_L6_2d_e_Series013.ims
129	µm	Surface	Position	128	µm	Surface	Position	10300	µm	Surface	Position	0	65	0	1	YFP	700004	3	YFP	700003	20241102_KGE-4593_L6_2d_e_Series013.ims	S:\AG\AG-Endres\Daten\Gertz-Kronenberg\von Majed\IMARIS\Microfetti\Ki-67 quantification\Data\2d\KGE4593\20241102_KGE-4593_L6_2d_e_Series013.ims
93.1	µm	Surface	Position	107	µm	Surface	Position	10300	µm	Surface	Position	0	66	0	1	YFP	700004	4	YFP	700003	20241102_KGE-4593_L6_2d_e_Series013.ims	S:\AG\AG-Endres\Daten\Gertz-Kronenberg\von Majed\IMARIS\Microfetti\Ki-67 quantification\Data\2d\KGE4593\20241102_KGE-4593_L6_2d_e_Series013.ims
38.7	µm	Surface	Position	11.7	µm	Surface	Position	10400	µm	Surface	Position	1	67	0	1	YFP	700004	5	YFP	700003	20241102_KGE-4593_L6_2d_e_Series013.ims	S:\AG\AG-Endres\Daten\Gertz-Kronenberg\von Majed\IMARIS\Microfetti\Ki-67 quantification\Data\2d\KGE4593\20241102_KGE-4593_L6_2d_e_Series013.ims
278	µm	Surface	Position	220	µm	Surface	Position	10300	µm	Surface	Position	1	68	0	1	YFP	700004	0	YFP	700003	20241102_KGE-5193_L8_2d_a_Series001.ims	S:\AG\AG-Endres\Daten\Gertz-Kronenberg\von Majed\IMARIS\Microfetti\Ki-67 quantification\Data\2d\KGE5193\20241102_KGE-5193_L8_2d_a_Series001.ims
269	µm	Surface	Position	216	µm	Surface	Position	10300	µm	Surface	Position	1	69	0	1	YFP	700004	3	YFP	700003	20241102_KGE-5193_L8_2d_a_Series001.ims	S:\AG\AG-Endres\Daten\Gertz-Kronenberg\von Majed\IMARIS\Microfetti\Ki-67 quantification\Data\2d\KGE5193\20241102_KGE-5193_L8_2d_a_Series001.ims
312	µm	Surface	Position	48.1	µm	Surface	Position	10300	µm	Surface	Position	1	70	0	1	YFP	700004	6	YFP	700003	20241102_KGE-5193_L8_2d_a_Series001.ims	S:\AG\AG-Endres\Daten\Gertz-Kronenberg\von Majed\IMARIS\Microfetti\Ki-67 quantification\Data\2d\KGE5193\20241102_KGE-5193_L8_2d_a_Series001.ims
131	µm	Surface	Position	182	µm	Surface	Position	10300	µm	Surface	Position	1	71	0	1	YFP	700004	7	YFP	700003	20241102_KGE-5193_L8_2d_a_Series001.ims	S:\AG\AG-Endres\Daten\Gertz-Kronenberg\von Majed\IMARIS\Microfetti\Ki-67 quantification\Data\2d\KGE5193\20241102_KGE-5193_L8_2d_a_Series001.ims
151	µm	Surface	Position	83.1	µm	Surface	Position	10300	µm	Surface	Position	1	72	0	1	YFP	700004	9	YFP	700003	20241102_KGE-5193_L8_2d_a_Series001.ims	S:\AG\AG-Endres\Daten\Gertz-Kronenberg\von Majed\IMARIS\Microfetti\Ki-67 quantification\Data\2d\KGE5193\20241102_KGE-5193_L8_2d_a_Series001.ims
81.4	µm	Surface	Position	339	µm	Surface	Position	10300	µm	Surface	Position	1	73	0	1	YFP	700004	3	YFP	700003	20241102_KGE-5193_L8_2d_b_Series003.ims	S:\AG\AG-Endres\Daten\Gertz-Kronenberg\von Majed\IMARIS\Microfetti\Ki-67 quantification\Data\2d\KGE5193\20241102_KGE-5193_L8_2d_b_Series003.ims
224	µm	Surface	Position	209	µm	Surface	Position	10300	µm	Surface	Position	1	74	0	1	YFP	700004	4	YFP	700003	20241102_KGE-5193_L8_2d_b_Series003.ims	S:\AG\AG-Endres\Daten\Gertz-Kronenberg\von Majed\IMARIS\Microfetti\Ki-67 quantification\Data\2d\KGE5193\20241102_KGE-5193_L8_2d_b_Series003.ims
198	µm	Surface	Position	200	µm	Surface	Position	10300	µm	Surface	Position	1	75	0	1	YFP	700004	5	YFP	700003	20241102_KGE-5193_L8_2d_b_Series003.ims	S:\AG\AG-Endres\Daten\Gertz-Kronenberg\von Majed\IMARIS\Microfetti\Ki-67 quantification\Data\2d\KGE5193\20241102_KGE-5193_L8_2d_b_Series003.ims
191	µm	Surface	Position	194	µm	Surface	Position	10300	µm	Surface	Position	1	76	0	1	YFP	700004	7	YFP	700003	20241102_KGE-5193_L8_2d_b_Series003.ims	S:\AG\AG-Endres\Daten\Gertz-Kronenberg\von Majed\IMARIS\Microfetti\Ki-67 quantification\Data\2d\KGE5193\20241102_KGE-5193_L8_2d_b_Series003.ims
206	µm	Surface	Position	142	µm	Surface	Position	10300	µm	Surface	Position	0	77	0	1	YFP	700004	9	YFP	700003	20241102_KGE-5193_L8_2d_b_Series003.ims	S:\AG\AG-Endres\Daten\Gertz-Kronenberg\von Majed\IMARIS\Microfetti\Ki-67 quantification\Data\2d\KGE5193\20241102_KGE-5193_L8_2d_b_Series003.ims
167	µm	Surface	Position	53.7	µm	Surface	Position	10300	µm	Surface	Position	0	78	0	1	YFP	700004	11	YFP	700003	20241102_KGE-5193_L8_2d_b_Series003.ims	S:\AG\AG-Endres\Daten\Gertz-Kronenberg\von Majed\IMARIS\Microfetti\Ki-67 quantification\Data\2d\KGE5193\20241102_KGE-5193_L8_2d_b_Series003.ims
3.25	µm	Surface	Position	242	µm	Surface	Position	10300	µm	Surface	Position	1	79	0	1	YFP	700004	12	YFP	700003	20241102_KGE-5193_L8_2d_b_Series003.ims	S:\AG\AG-Endres\Daten\Gertz-Kronenberg\von Majed\IMARIS\Microfetti\Ki-67 quantification\Data\2d\KGE5193\20241102_KGE-5193_L8_2d_b_Series003.ims
22.8	µm	Surface	Position	120	µm	Surface	Position	10300	µm	Surface	Position	1	80	0	1	YFP	700004	18	YFP	700003	20241102_KGE-5193_L8_2d_b_Series003.ims	S:\AG\AG-Endres\Daten\Gertz-Kronenberg\von Majed\IMARIS\Microfetti\Ki-67 quantification\Data\2d\KGE5193\20241102_KGE-5193_L8_2d_b_Series003.ims
292	µm	Surface	Position	117	µm	Surface	Position	10300	µm	Surface	Position	1	81	0	1	YFP	700004	0	YFP	700002	20241102_KGE-5193_L8_2d_c_Series005.ims	S:\AG\AG-Endres\Daten\Gertz-Kronenberg\von Majed\IMARIS\Microfetti\Ki-67 quantification\Data\2d\KGE5193\20241102_KGE-5193_L8_2d_c_Series005.ims
302	µm	Surface	Position	106	µm	Surface	Position	10300	µm	Surface	Position	1	82	0	1	YFP	700004	1	YFP	700002	20241102_KGE-5193_L8_2d_c_Series005.ims	S:\AG\AG-Endres\Daten\Gertz-Kronenberg\von Majed\IMARIS\Microfetti\Ki-67 quantification\Data\2d\KGE5193\20241102_KGE-5193_L8_2d_c_Series005.ims
97.1	µm	Surface	Position	241	µm	Surface	Position	10300	µm	Surface	Position	1	83	0	1	YFP	700004	2	YFP	700002	20241102_KGE-5193_L8_2d_c_Series005.ims	S:\AG\AG-Endres\Daten\Gertz-Kronenberg\von Majed\IMARIS\Microfetti\Ki-67 quantification\Data\2d\KGE5193\20241102_KGE-5193_L8_2d_c_Series005.ims
146	µm	Surface	Position	158	µm	Surface	Position	10300	µm	Surface	Position	1	84	0	1	YFP	700004	3	YFP	700002	20241102_KGE-5193_L8_2d_c_Series005.ims	S:\AG\AG-Endres\Daten\Gertz-Kronenberg\von Majed\IMARIS\Microfetti\Ki-67 quantification\Data\2d\KGE5193\20241102_KGE-5193_L8_2d_c_Series005.ims
78.3	µm	Surface	Position	339	µm	Surface	Position	10300	µm	Surface	Position	1	85	0	1	YFP	700004	0	YFP	700003	20241102_KGE-5193_L8_2d_d_Series007.ims	S:\AG\AG-Endres\Daten\Gertz-Kronenberg\von Majed\IMARIS\Microfetti\Ki-67 quantification\Data\2d\KGE5193\20241102_KGE-5193_L8_2d_d_Series007.ims
190	µm	Surface	Position	142	µm	Surface	Position	10300	µm	Surface	Position	1	86	0	1	YFP	700004	2	YFP	700003	20241102_KGE-5193_L8_2d_d_Series007.ims	S:\AG\AG-Endres\Daten\Gertz-Kronenberg\von Majed\IMARIS\Microfetti\Ki-67 quantification\Data\2d\KGE5193\20241102_KGE-5193_L8_2d_d_Series007.ims
297	µm	Surface	Position	86.9	µm	Surface	Position	10300	µm	Surface	Position	1	87	0	1	YFP	700004	1	YFP	700003	20241102_KGE-5193_L8_2d_e_Series009.ims	S:\AG\AG-Endres\Daten\Gertz-Kronenberg\von Majed\IMARIS\Microfetti\Ki-67 quantification\Data\2d\KGE5193\20241102_KGE-5193_L8_2d_e_Series009.ims
220	µm	Surface	Position	151	µm	Surface	Position	10300	µm	Surface	Position	0	88	0	1	YFP	700004	2	YFP	700003	20241102_KGE-5193_L8_2d_e_Series009.ims	S:\AG\AG-Endres\Daten\Gertz-Kronenberg\von Majed\IMARIS\Microfetti\Ki-67 quantification\Data\2d\KGE5193\20241102_KGE-5193_L8_2d_e_Series009.ims
207	µm	Surface	Position	109	µm	Surface	Position	10300	µm	Surface	Position	0	89	0	1	YFP	700004	3	YFP	700003	20241102_KGE-5193_L8_2d_e_Series009.ims	S:\AG\AG-Endres\Daten\Gertz-Kronenberg\von Majed\IMARIS\Microfetti\Ki-67 quantification\Data\2d\KGE5193\20241102_KGE-5193_L8_2d_e_Series009.ims
94.7	µm	Surface	Position	111	µm	Surface	Position	10300	µm	Surface	Position	1	90	0	1	YFP	700004	5	YFP	700003	20241102_KGE-5193_L8_2d_e_Series009.ims	S:\AG\AG-Endres\Daten\Gertz-Kronenberg\von Majed\IMARIS\Microfetti\Ki-67 quantification\Data\2d\KGE5193\20241102_KGE-5193_L8_2d_e_Series009.ims
80.2	µm	Surface	Position	94.8	µm	Surface	Position	10300	µm	Surface	Position	1	91	0	1	YFP	700004	6	YFP	700003	20241102_KGE-5193_L8_2d_e_Series009.ims	S:\AG\AG-Endres\Daten\Gertz-Kronenberg\von Majed\IMARIS\Microfetti\Ki-67 quantification\Data\2d\KGE5193\20241102_KGE-5193_L8_2d_e_Series009.ims
192	µm	Surface	Position	301	µm	Surface	Position	10500	µm	Surface	Position	0	92	0	1	YFP	700004	0	YFP	700003	20241103_KGE-5319_L9_2d_a_Series001.ims	S:\AG\AG-Endres\Daten\Gertz-Kronenberg\von Majed\IMARIS\Microfetti\Ki-67 quantification\Data\2d\KGE5319\20241103_KGE-5319_L9_2d_a_Series001.ims
335	µm	Surface	Position	141	µm	Surface	Position	10400	µm	Surface	Position	1	93	0	1	YFP	700004	5	YFP	700003	20241103_KGE-5319_L9_2d_a_Series001.ims	S:\AG\AG-Endres\Daten\Gertz-Kronenberg\von Majed\IMARIS\Microfetti\Ki-67 quantification\Data\2d\KGE5319\20241103_KGE-5319_L9_2d_a_Series001.ims
174	µm	Surface	Position	222	µm	Surface	Position	10500	µm	Surface	Position	0	94	0	1	YFP	700004	2	YFP	700002	20241103_KGE-5319_L9_2d_b_Series003.ims	S:\AG\AG-Endres\Daten\Gertz-Kronenberg\von Majed\IMARIS\Microfetti\Ki-67 quantification\Data\2d\KGE5319\20241103_KGE-5319_L9_2d_b_Series003.ims
181	µm	Surface	Position	235	µm	Surface	Position	10500	µm	Surface	Position	0	95	0	1	YFP	700004	3	YFP	700002	20241103_KGE-5319_L9_2d_b_Series003.ims	S:\AG\AG-Endres\Daten\Gertz-Kronenberg\von Majed\IMARIS\Microfetti\Ki-67 quantification\Data\2d\KGE5319\20241103_KGE-5319_L9_2d_b_Series003.ims
107	µm	Surface	Position	272	µm	Surface	Position	10500	µm	Surface	Position	0	96	0	1	YFP	700004	4	YFP	700002	20241103_KGE-5319_L9_2d_b_Series003.ims	S:\AG\AG-Endres\Daten\Gertz-Kronenberg\von Majed\IMARIS\Microfetti\Ki-67 quantification\Data\2d\KGE5319\20241103_KGE-5319_L9_2d_b_Series003.ims
187	µm	Surface	Position	121	µm	Surface	Position	10400	µm	Surface	Position	1	97	0	1	YFP	700004	6	YFP	700002	20241103_KGE-5319_L9_2d_b_Series003.ims	S:\AG\AG-Endres\Daten\Gertz-Kronenberg\von Majed\IMARIS\Microfetti\Ki-67 quantification\Data\2d\KGE5319\20241103_KGE-5319_L9_2d_b_Series003.ims
148	µm	Surface	Position	131	µm	Surface	Position	10400	µm	Surface	Position	0	98	0	1	YFP	700004	7	YFP	700002	20241103_KGE-5319_L9_2d_b_Series003.ims	S:\AG\AG-Endres\Daten\Gertz-Kronenberg\von Majed\IMARIS\Microfetti\Ki-67 quantification\Data\2d\KGE5319\20241103_KGE-5319_L9_2d_b_Series003.ims
364	µm	Surface	Position	223	µm	Surface	Position	10500	µm	Surface	Position	0	99	0	1	YFP	700004	0	YFP	700003	20241103_KGE-5319_L9_2d_c_Series005.ims	S:\AG\AG-Endres\Daten\Gertz-Kronenberg\von Majed\IMARIS\Microfetti\Ki-67 quantification\Data\2d\KGE5319\20241103_KGE-5319_L9_2d_c_Series005.ims
208	µm	Surface	Position	193	µm	Surface	Position	10400	µm	Surface	Position	0	100	0	1	YFP	700004	1	YFP	700003	20241103_KGE-5319_L9_2d_c_Series005.ims	S:\AG\AG-Endres\Daten\Gertz-Kronenberg\von Majed\IMARIS\Microfetti\Ki-67 quantification\Data\2d\KGE5319\20241103_KGE-5319_L9_2d_c_Series005.ims
155	µm	Surface	Position	232	µm	Surface	Position	10500	µm	Surface	Position	0	101	0	1	YFP	700004	2	YFP	700003	20241103_KGE-5319_L9_2d_c_Series005.ims	S:\AG\AG-Endres\Daten\Gertz-Kronenberg\von Majed\IMARIS\Microfetti\Ki-67 quantification\Data\2d\KGE5319\20241103_KGE-5319_L9_2d_c_Series005.ims
16.3	µm	Surface	Position	179	µm	Surface	Position	10500	µm	Surface	Position	0	102	0	1	YFP	700004	3	YFP	700003	20241103_KGE-5319_L9_2d_c_Series005.ims	S:\AG\AG-Endres\Daten\Gertz-Kronenberg\von Majed\IMARIS\Microfetti\Ki-67 quantification\Data\2d\KGE5319\20241103_KGE-5319_L9_2d_c_Series005.ims
348	µm	Surface	Position	70.6	µm	Surface	Position	10500	µm	Surface	Position	0	103	0	1	YFP	700004	8	YFP	700003	20241103_KGE-5319_L9_2d_d_Series007.ims	S:\AG\AG-Endres\Daten\Gertz-Kronenberg\von Majed\IMARIS\Microfetti\Ki-67 quantification\Data\2d\KGE5319\20241103_KGE-5319_L9_2d_d_Series007.ims
86.3	µm	Surface	Position	289	µm	Surface	Position	10500	µm	Surface	Position	0	104	0	1	YFP	700004	9	YFP	700003	20241103_KGE-5319_L9_2d_d_Series007.ims	S:\AG\AG-Endres\Daten\Gertz-Kronenberg\von Majed\IMARIS\Microfetti\Ki-67 quantification\Data\2d\KGE5319\20241103_KGE-5319_L9_2d_d_Series007.ims
156	µm	Surface	Position	149	µm	Surface	Position	10500	µm	Surface	Position	0	105	0	1	YFP	700004	10	YFP	700003	20241103_KGE-5319_L9_2d_d_Series007.ims	S:\AG\AG-Endres\Daten\Gertz-Kronenberg\von Majed\IMARIS\Microfetti\Ki-67 quantification\Data\2d\KGE5319\20241103_KGE-5319_L9_2d_d_Series007.ims
121	µm	Surface	Position	140	µm	Surface	Position	10500	µm	Surface	Position	0	106	0	1	YFP	700004	11	YFP	700003	20241103_KGE-5319_L9_2d_d_Series007.ims	S:\AG\AG-Endres\Daten\Gertz-Kronenberg\von Majed\IMARIS\Microfetti\Ki-67 quantification\Data\2d\KGE5319\20241103_KGE-5319_L9_2d_d_Series007.ims
264	µm	Surface	Position	309	µm	Surface	Position	10500	µm	Surface	Position	1	107	0	1	YFP	700004	0	YFP	700003	20241103_KGE-5319_L9_2d_e_Series009.ims	S:\AG\AG-Endres\Daten\Gertz-Kronenberg\von Majed\IMARIS\Microfetti\Ki-67 quantification\Data\2d\KGE5319\20241103_KGE-5319_L9_2d_e_Series009.ims
247	µm	Surface	Position	248	µm	Surface	Position	10500	µm	Surface	Position	1	108	0	1	YFP	700004	1	YFP	700003	20241103_KGE-5319_L9_2d_e_Series009.ims	S:\AG\AG-Endres\Daten\Gertz-Kronenberg\von Majed\IMARIS\Microfetti\Ki-67 quantification\Data\2d\KGE5319\20241103_KGE-5319_L9_2d_e_Series009.ims
244	µm	Surface	Position	155	µm	Surface	Position	10500	µm	Surface	Position	1	109	0	1	YFP	700004	2	YFP	700003	20241103_KGE-5319_L9_2d_e_Series009.ims	S:\AG\AG-Endres\Daten\Gertz-Kronenberg\von Majed\IMARIS\Microfetti\Ki-67 quantification\Data\2d\KGE5319\20241103_KGE-5319_L9_2d_e_Series009.ims
188	µm	Surface	Position	173	µm	Surface	Position	10500	µm	Surface	Position	1	110	0	1	YFP	700004	7	YFP	700003	20241103_KGE-5319_L9_2d_e_Series009.ims	S:\AG\AG-Endres\Daten\Gertz-Kronenberg\von Majed\IMARIS\Microfetti\Ki-67 quantification\Data\2d\KGE5319\20241103_KGE-5319_L9_2d_e_Series009.ims
195	µm	Surface	Position	140	µm	Surface	Position	10500	µm	Surface	Position	0	111	0	1	YFP	700004	8	YFP	700003	20241103_KGE-5319_L9_2d_e_Series009.ims	S:\AG\AG-Endres\Daten\Gertz-Kronenberg\von Majed\IMARIS\Microfetti\Ki-67 quantification\Data\2d\KGE5319\20241103_KGE-5319_L9_2d_e_Series009.ims
153	µm	Surface	Position	56.6	µm	Surface	Position	10500	µm	Surface	Position	1	112	0	1	YFP	700004	10	YFP	700003	20241103_KGE-5319_L9_2d_e_Series009.ims	S:\AG\AG-Endres\Daten\Gertz-Kronenberg\von Majed\IMARIS\Microfetti\Ki-67 quantification\Data\2d\KGE5319\20241103_KGE-5319_L9_2d_e_Series009.ims
342	µm	Surface	Position	322	µm	Surface	Position	10400	µm	Surface	Position	0	113	0	1	YFP	700004	0	YFP	700002	20241103_KGE-5320_L9_2d_b_Series004.ims	S:\AG\AG-Endres\Daten\Gertz-Kronenberg\von Majed\IMARIS\Microfetti\Ki-67 quantification\Data\2d\KGE5320\20241103_KGE-5320_L9_2d_b_Series004.ims
314	µm	Surface	Position	71.5	µm	Surface	Position	10400	µm	Surface	Position	0	114	0	1	YFP	700004	3	YFP	700002	20241103_KGE-5320_L9_2d_b_Series004.ims	S:\AG\AG-Endres\Daten\Gertz-Kronenberg\von Majed\IMARIS\Microfetti\Ki-67 quantification\Data\2d\KGE5320\20241103_KGE-5320_L9_2d_b_Series004.ims
204	µm	Surface	Position	55.6	µm	Surface	Position	10400	µm	Surface	Position	0	115	0	1	YFP	700004	0	YFP	700003	20241103_KGE-5320_L9_2d_c_Series006.ims	S:\AG\AG-Endres\Daten\Gertz-Kronenberg\von Majed\IMARIS\Microfetti\Ki-67 quantification\Data\2d\KGE5320\20241103_KGE-5320_L9_2d_c_Series006.ims
132	µm	Surface	Position	90.5	µm	Surface	Position	10400	µm	Surface	Position	0	116	0	1	YFP	700004	1	YFP	700003	20241103_KGE-5320_L9_2d_c_Series006.ims	S:\AG\AG-Endres\Daten\Gertz-Kronenberg\von Majed\IMARIS\Microfetti\Ki-67 quantification\Data\2d\KGE5320\20241103_KGE-5320_L9_2d_c_Series006.ims
167	µm	Surface	Position	102	µm	Surface	Position	10400	µm	Surface	Position	0	117	0	1	YFP	700004	3	YFP	700002	20241103_KGE-5320_L9_2d_d_Series008.ims	S:\AG\AG-Endres\Daten\Gertz-Kronenberg\von Majed\IMARIS\Microfetti\Ki-67 quantification\Data\2d\KGE5320\20241103_KGE-5320_L9_2d_d_Series008.ims
99.7	µm	Surface	Position	251	µm	Surface	Position	10400	µm	Surface	Position	0	118	0	1	YFP	700004	0	YFP	700002	20241103_KGE-5320_L9_2d_e_Series010.ims	S:\AG\AG-Endres\Daten\Gertz-Kronenberg\von Majed\IMARIS\Microfetti\Ki-67 quantification\Data\2d\KGE5320\20241103_KGE-5320_L9_2d_e_Series010.ims
86.2	µm	Surface	Position	252	µm	Surface	Position	10400	µm	Surface	Position	0	119	0	1	YFP	700004	1	YFP	700002	20241103_KGE-5320_L9_2d_e_Series010.ims	S:\AG\AG-Endres\Daten\Gertz-Kronenberg\von Majed\IMARIS\Microfetti\Ki-67 quantification\Data\2d\KGE5320\20241103_KGE-5320_L9_2d_e_Series010.ims
312	µm	Surface	Position	153	µm	Surface	Position	10400	µm	Surface	Position	0	120	0	1	YFP	700004	1	YFP	700003	20241102_KGE-5321_L9_2d_a_Series001.ims	S:\AG\AG-Endres\Daten\Gertz-Kronenberg\von Majed\IMARIS\Microfetti\Ki-67 quantification\Data\2d\KGE5321\20241102_KGE-5321_L9_2d_a_Series001.ims
164	µm	Surface	Position	257	µm	Surface	Position	10400	µm	Surface	Position	1	121	0	1	YFP	700004	2	YFP	700003	20241102_KGE-5321_L9_2d_a_Series001.ims	S:\AG\AG-Endres\Daten\Gertz-Kronenberg\von Majed\IMARIS\Microfetti\Ki-67 quantification\Data\2d\KGE5321\20241102_KGE-5321_L9_2d_a_Series001.ims
100	µm	Surface	Position	343	µm	Surface	Position	10400	µm	Surface	Position	1	122	0	1	YFP	700004	3	YFP	700003	20241102_KGE-5321_L9_2d_a_Series001.ims	S:\AG\AG-Endres\Daten\Gertz-Kronenberg\von Majed\IMARIS\Microfetti\Ki-67 quantification\Data\2d\KGE5321\20241102_KGE-5321_L9_2d_a_Series001.ims
128	µm	Surface	Position	306	µm	Surface	Position	10400	µm	Surface	Position	0	123	0	1	YFP	700004	4	YFP	700003	20241102_KGE-5321_L9_2d_a_Series001.ims	S:\AG\AG-Endres\Daten\Gertz-Kronenberg\von Majed\IMARIS\Microfetti\Ki-67 quantification\Data\2d\KGE5321\20241102_KGE-5321_L9_2d_a_Series001.ims
204	µm	Surface	Position	245	µm	Surface	Position	10400	µm	Surface	Position	1	124	0	1	YFP	700004	6	YFP	700003	20241102_KGE-5321_L9_2d_a_Series001.ims	S:\AG\AG-Endres\Daten\Gertz-Kronenberg\von Majed\IMARIS\Microfetti\Ki-67 quantification\Data\2d\KGE5321\20241102_KGE-5321_L9_2d_a_Series001.ims
54.4	µm	Surface	Position	296	µm	Surface	Position	10400	µm	Surface	Position	1	125	0	1	YFP	700004	8	YFP	700003	20241102_KGE-5321_L9_2d_a_Series001.ims	S:\AG\AG-Endres\Daten\Gertz-Kronenberg\von Majed\IMARIS\Microfetti\Ki-67 quantification\Data\2d\KGE5321\20241102_KGE-5321_L9_2d_a_Series001.ims
42	µm	Surface	Position	270	µm	Surface	Position	10400	µm	Surface	Position	1	126	0	1	YFP	700004	12	YFP	700003	20241102_KGE-5321_L9_2d_a_Series001.ims	S:\AG\AG-Endres\Daten\Gertz-Kronenberg\von Majed\IMARIS\Microfetti\Ki-67 quantification\Data\2d\KGE5321\20241102_KGE-5321_L9_2d_a_Series001.ims
166	µm	Surface	Position	82.4	µm	Surface	Position	10400	µm	Surface	Position	1	127	0	1	YFP	700004	14	YFP	700003	20241102_KGE-5321_L9_2d_a_Series001.ims	S:\AG\AG-Endres\Daten\Gertz-Kronenberg\von Majed\IMARIS\Microfetti\Ki-67 quantification\Data\2d\KGE5321\20241102_KGE-5321_L9_2d_a_Series001.ims
104	µm	Surface	Position	48.8	µm	Surface	Position	10400	µm	Surface	Position	1	128	0	1	YFP	700004	17	YFP	700003	20241102_KGE-5321_L9_2d_a_Series001.ims	S:\AG\AG-Endres\Daten\Gertz-Kronenberg\von Majed\IMARIS\Microfetti\Ki-67 quantification\Data\2d\KGE5321\20241102_KGE-5321_L9_2d_a_Series001.ims
346	µm	Surface	Position	123	µm	Surface	Position	10400	µm	Surface	Position	0	129	0	1	YFP	700004	0	YFP	700003	20241102_KGE-5321_L9_2d_b_Series003.ims	S:\AG\AG-Endres\Daten\Gertz-Kronenberg\von Majed\IMARIS\Microfetti\Ki-67 quantification\Data\2d\KGE5321\20241102_KGE-5321_L9_2d_b_Series003.ims
11.6	µm	Surface	Position	257	µm	Surface	Position	10400	µm	Surface	Position	1	130	0	1	YFP	700004	3	YFP	700003	20241102_KGE-5321_L9_2d_b_Series003.ims	S:\AG\AG-Endres\Daten\Gertz-Kronenberg\von Majed\IMARIS\Microfetti\Ki-67 quantification\Data\2d\KGE5321\20241102_KGE-5321_L9_2d_b_Series003.ims
81.5	µm	Surface	Position	196	µm	Surface	Position	10400	µm	Surface	Position	1	131	0	1	YFP	700004	4	YFP	700003	20241102_KGE-5321_L9_2d_b_Series003.ims	S:\AG\AG-Endres\Daten\Gertz-Kronenberg\von Majed\IMARIS\Microfetti\Ki-67 quantification\Data\2d\KGE5321\20241102_KGE-5321_L9_2d_b_Series003.ims
31.4	µm	Surface	Position	211	µm	Surface	Position	10400	µm	Surface	Position	1	132	0	1	YFP	700004	5	YFP	700003	20241102_KGE-5321_L9_2d_b_Series003.ims	S:\AG\AG-Endres\Daten\Gertz-Kronenberg\von Majed\IMARIS\Microfetti\Ki-67 quantification\Data\2d\KGE5321\20241102_KGE-5321_L9_2d_b_Series003.ims
94.9	µm	Surface	Position	92.5	µm	Surface	Position	10400	µm	Surface	Position	1	133	0	1	YFP	700004	7	YFP	700003	20241102_KGE-5321_L9_2d_b_Series003.ims	S:\AG\AG-Endres\Daten\Gertz-Kronenberg\von Majed\IMARIS\Microfetti\Ki-67 quantification\Data\2d\KGE5321\20241102_KGE-5321_L9_2d_b_Series003.ims
67.8	µm	Surface	Position	70	µm	Surface	Position	10400	µm	Surface	Position	0	134	0	1	YFP	700004	10	YFP	700003	20241102_KGE-5321_L9_2d_b_Series003.ims	S:\AG\AG-Endres\Daten\Gertz-Kronenberg\von Majed\IMARIS\Microfetti\Ki-67 quantification\Data\2d\KGE5321\20241102_KGE-5321_L9_2d_b_Series003.ims
78.2	µm	Surface	Position	267	µm	Surface	Position	10400	µm	Surface	Position	0	135	0	1	YFP	700004	1	YFP	700003	20241102_KGE-5321_L9_2d_c_Series005.ims	S:\AG\AG-Endres\Daten\Gertz-Kronenberg\von Majed\IMARIS\Microfetti\Ki-67 quantification\Data\2d\KGE5321\20241102_KGE-5321_L9_2d_c_Series005.ims
281	µm	Surface	Position	57.2	µm	Surface	Position	10400	µm	Surface	Position	0	136	0	1	YFP	700004	2	YFP	700003	20241102_KGE-5321_L9_2d_c_Series005.ims	S:\AG\AG-Endres\Daten\Gertz-Kronenberg\von Majed\IMARIS\Microfetti\Ki-67 quantification\Data\2d\KGE5321\20241102_KGE-5321_L9_2d_c_Series005.ims
331	µm	Surface	Position	161	µm	Surface	Position	10400	µm	Surface	Position	0	137	0	1	YFP	700004	1	YFP	700003	20241102_KGE-5321_L9_2d_d_Series007.ims	S:\AG\AG-Endres\Daten\Gertz-Kronenberg\von Majed\IMARIS\Microfetti\Ki-67 quantification\Data\2d\KGE5321\20241102_KGE-5321_L9_2d_d_Series007.ims
240	µm	Surface	Position	229	µm	Surface	Position	10400	µm	Surface	Position	0	138	0	1	YFP	700004	2	YFP	700003	20241102_KGE-5321_L9_2d_d_Series007.ims	S:\AG\AG-Endres\Daten\Gertz-Kronenberg\von Majed\IMARIS\Microfetti\Ki-67 quantification\Data\2d\KGE5321\20241102_KGE-5321_L9_2d_d_Series007.ims
229	µm	Surface	Position	135	µm	Surface	Position	10400	µm	Surface	Position	0	139	0	1	YFP	700004	6	YFP	700003	20241102_KGE-5321_L9_2d_d_Series007.ims	S:\AG\AG-Endres\Daten\Gertz-Kronenberg\von Majed\IMARIS\Microfetti\Ki-67 quantification\Data\2d\KGE5321\20241102_KGE-5321_L9_2d_d_Series007.ims
209	µm	Surface	Position	146	µm	Surface	Position	10400	µm	Surface	Position	0	140	0	1	YFP	700004	7	YFP	700003	20241102_KGE-5321_L9_2d_d_Series007.ims	S:\AG\AG-Endres\Daten\Gertz-Kronenberg\von Majed\IMARIS\Microfetti\Ki-67 quantification\Data\2d\KGE5321\20241102_KGE-5321_L9_2d_d_Series007.ims
218	µm	Surface	Position	121	µm	Surface	Position	10400	µm	Surface	Position	0	141	0	1	YFP	700004	9	YFP	700003	20241102_KGE-5321_L9_2d_d_Series007.ims	S:\AG\AG-Endres\Daten\Gertz-Kronenberg\von Majed\IMARIS\Microfetti\Ki-67 quantification\Data\2d\KGE5321\20241102_KGE-5321_L9_2d_d_Series007.ims
169	µm	Surface	Position	122	µm	Surface	Position	10400	µm	Surface	Position	0	142	0	1	YFP	700004	12	YFP	700003	20241102_KGE-5321_L9_2d_d_Series007.ims	S:\AG\AG-Endres\Daten\Gertz-Kronenberg\von Majed\IMARIS\Microfetti\Ki-67 quantification\Data\2d\KGE5321\20241102_KGE-5321_L9_2d_d_Series007.ims
216	µm	Surface	Position	78	µm	Surface	Position	10400	µm	Surface	Position	0	143	0	1	YFP	700004	14	YFP	700003	20241102_KGE-5321_L9_2d_d_Series007.ims	S:\AG\AG-Endres\Daten\Gertz-Kronenberg\von Majed\IMARIS\Microfetti\Ki-67 quantification\Data\2d\KGE5321\20241102_KGE-5321_L9_2d_d_Series007.ims
134	µm	Surface	Position	42.9	µm	Surface	Position	10400	µm	Surface	Position	0	144	0	1	YFP	700004	17	YFP	700003	20241102_KGE-5321_L9_2d_d_Series007.ims	S:\AG\AG-Endres\Daten\Gertz-Kronenberg\von Majed\IMARIS\Microfetti\Ki-67 quantification\Data\2d\KGE5321\20241102_KGE-5321_L9_2d_d_Series007.ims
38.7	µm	Surface	Position	144	µm	Surface	Position	10400	µm	Surface	Position	0	145	0	1	YFP	700004	19	YFP	700003	20241102_KGE-5321_L9_2d_d_Series007.ims	S:\AG\AG-Endres\Daten\Gertz-Kronenberg\von Majed\IMARIS\Microfetti\Ki-67 quantification\Data\2d\KGE5321\20241102_KGE-5321_L9_2d_d_Series007.ims
2.66	µm	Surface	Position	11.4	µm	Surface	Position	10400	µm	Surface	Position	1	146	0	1	YFP	700004	20	YFP	700003	20241102_KGE-5321_L9_2d_d_Series007.ims	S:\AG\AG-Endres\Daten\Gertz-Kronenberg\von Majed\IMARIS\Microfetti\Ki-67 quantification\Data\2d\KGE5321\20241102_KGE-5321_L9_2d_d_Series007.ims
227	µm	Surface	Position	360	µm	Surface	Position	10400	µm	Surface	Position	0	147	0	1	YFP	700004	0	YFP	700003	20241102_KGE-5321_L9_2d_e_Series009.ims	S:\AG\AG-Endres\Daten\Gertz-Kronenberg\von Majed\IMARIS\Microfetti\Ki-67 quantification\Data\2d\KGE5321\20241102_KGE-5321_L9_2d_e_Series009.ims
117	µm	Surface	Position	305	µm	Surface	Position	10400	µm	Surface	Position	0	148	0	1	YFP	700004	3	YFP	700003	20241102_KGE-5321_L9_2d_e_Series009.ims	S:\AG\AG-Endres\Daten\Gertz-Kronenberg\von Majed\IMARIS\Microfetti\Ki-67 quantification\Data\2d\KGE5321\20241102_KGE-5321_L9_2d_e_Series009.ims
242	µm	Surface	Position	199	µm	Surface	Position	10400	µm	Surface	Position	0	149	0	1	YFP	700004	4	YFP	700003	20241102_KGE-5321_L9_2d_e_Series009.ims	S:\AG\AG-Endres\Daten\Gertz-Kronenberg\von Majed\IMARIS\Microfetti\Ki-67 quantification\Data\2d\KGE5321\20241102_KGE-5321_L9_2d_e_Series009.ims
243	µm	Surface	Position	151	µm	Surface	Position	10400	µm	Surface	Position	0	150	0	1	YFP	700004	5	YFP	700003	20241102_KGE-5321_L9_2d_e_Series009.ims	S:\AG\AG-Endres\Daten\Gertz-Kronenberg\von Majed\IMARIS\Microfetti\Ki-67 quantification\Data\2d\KGE5321\20241102_KGE-5321_L9_2d_e_Series009.ims
102	µm	Surface	Position	298	µm	Surface	Position	10400	µm	Surface	Position	0	151	0	1	YFP	700004	6	YFP	700003	20241102_KGE-5321_L9_2d_e_Series009.ims	S:\AG\AG-Endres\Daten\Gertz-Kronenberg\von Majed\IMARIS\Microfetti\Ki-67 quantification\Data\2d\KGE5321\20241102_KGE-5321_L9_2d_e_Series009.ims
225	µm	Surface	Position	165	µm	Surface	Position	10400	µm	Surface	Position	0	152	0	1	YFP	700004	7	YFP	700003	20241102_KGE-5321_L9_2d_e_Series009.ims	S:\AG\AG-Endres\Daten\Gertz-Kronenberg\von Majed\IMARIS\Microfetti\Ki-67 quantification\Data\2d\KGE5321\20241102_KGE-5321_L9_2d_e_Series009.ims
231	µm	Surface	Position	133	µm	Surface	Position	10400	µm	Surface	Position	0	153	0	1	YFP	700004	9	YFP	700003	20241102_KGE-5321_L9_2d_e_Series009.ims	S:\AG\AG-Endres\Daten\Gertz-Kronenberg\von Majed\IMARIS\Microfetti\Ki-67 quantification\Data\2d\KGE5321\20241102_KGE-5321_L9_2d_e_Series009.ims
228	µm	Surface	Position	31	µm	Surface	Position	10400	µm	Surface	Position	0	154	0	1	YFP	700004	13	YFP	700003	20241102_KGE-5321_L9_2d_e_Series009.ims	S:\AG\AG-Endres\Daten\Gertz-Kronenberg\von Majed\IMARIS\Microfetti\Ki-67 quantification\Data\2d\KGE5321\20241102_KGE-5321_L9_2d_e_Series009.ims
322	µm	Surface	Position	197	µm	Surface	Position	10400	µm	Surface	Position	0	2	0	1	CFP	700001	2	CFP	700001	20241106_kge-3319_l5_1w_a_series001_a_series001.ims	S:\AG\AG-Endres\Daten\Gertz-Kronenberg\von Majed\IMARIS\Microfetti\Ki-67 quantification\Data\1w\KGE3319\20241106_kge-3319_l5_1w_a_series001_a_series001.ims
324	µm	Surface	Position	217	µm	Surface	Position	10400	µm	Surface	Position	0	3	0	1	CFP	700001	3	CFP	700001	20241106_kge-3319_l5_1w_a_series001_a_series001.ims	S:\AG\AG-Endres\Daten\Gertz-Kronenberg\von Majed\IMARIS\Microfetti\Ki-67 quantification\Data\1w\KGE3319\20241106_kge-3319_l5_1w_a_series001_a_series001.ims
326	µm	Surface	Position	241	µm	Surface	Position	10400	µm	Surface	Position	0	4	0	1	CFP	700001	4	CFP	700001	20241106_kge-3319_l5_1w_a_series001_a_series001.ims	S:\AG\AG-Endres\Daten\Gertz-Kronenberg\von Majed\IMARIS\Microfetti\Ki-67 quantification\Data\1w\KGE3319\20241106_kge-3319_l5_1w_a_series001_a_series001.ims
221	µm	Surface	Position	240	µm	Surface	Position	10400	µm	Surface	Position	0	7	0	1	CFP	700001	7	CFP	700001	20241106_kge-3319_l5_1w_a_series001_a_series001.ims	S:\AG\AG-Endres\Daten\Gertz-Kronenberg\von Majed\IMARIS\Microfetti\Ki-67 quantification\Data\1w\KGE3319\20241106_kge-3319_l5_1w_a_series001_a_series001.ims
51.7	µm	Surface	Position	90.8	µm	Surface	Position	10500	µm	Surface	Position	0	16	0	1	CFP	700001	16	CFP	700001	20241106_kge-3319_l5_1w_a_series001_a_series001.ims	S:\AG\AG-Endres\Daten\Gertz-Kronenberg\von Majed\IMARIS\Microfetti\Ki-67 quantification\Data\1w\KGE3319\20241106_kge-3319_l5_1w_a_series001_a_series001.ims
65.4	µm	Surface	Position	91.9	µm	Surface	Position	10400	µm	Surface	Position	0	18	0	1	CFP	700001	18	CFP	700001	20241106_kge-3319_l5_1w_a_series001_a_series001.ims	S:\AG\AG-Endres\Daten\Gertz-Kronenberg\von Majed\IMARIS\Microfetti\Ki-67 quantification\Data\1w\KGE3319\20241106_kge-3319_l5_1w_a_series001_a_series001.ims
60.2	µm	Surface	Position	79	µm	Surface	Position	10400	µm	Surface	Position	0	20	0	1	CFP	700001	20	CFP	700001	20241106_kge-3319_l5_1w_a_series001_a_series001.ims	S:\AG\AG-Endres\Daten\Gertz-Kronenberg\von Majed\IMARIS\Microfetti\Ki-67 quantification\Data\1w\KGE3319\20241106_kge-3319_l5_1w_a_series001_a_series001.ims
222	µm	Surface	Position	352	µm	Surface	Position	10400	µm	Surface	Position	0	21	0	1	CFP	700001	62	CFP	700001	20241106_kge-3319_l5_1w_a_series001_b_series004.ims	S:\AG\AG-Endres\Daten\Gertz-Kronenberg\von Majed\IMARIS\Microfetti\Ki-67 quantification\Data\1w\KGE3319\20241106_kge-3319_l5_1w_a_series001_b_series004.ims
324	µm	Surface	Position	240	µm	Surface	Position	10400	µm	Surface	Position	0	22	0	1	CFP	700001	63	CFP	700001	20241106_kge-3319_l5_1w_a_series001_b_series004.ims	S:\AG\AG-Endres\Daten\Gertz-Kronenberg\von Majed\IMARIS\Microfetti\Ki-67 quantification\Data\1w\KGE3319\20241106_kge-3319_l5_1w_a_series001_b_series004.ims
347	µm	Surface	Position	223	µm	Surface	Position	10400	µm	Surface	Position	0	23	0	1	CFP	700001	65	CFP	700001	20241106_kge-3319_l5_1w_a_series001_b_series004.ims	S:\AG\AG-Endres\Daten\Gertz-Kronenberg\von Majed\IMARIS\Microfetti\Ki-67 quantification\Data\1w\KGE3319\20241106_kge-3319_l5_1w_a_series001_b_series004.ims
165	µm	Surface	Position	361	µm	Surface	Position	10400	µm	Surface	Position	0	24	0	1	CFP	700001	70	CFP	700001	20241106_kge-3319_l5_1w_a_series001_b_series004.ims	S:\AG\AG-Endres\Daten\Gertz-Kronenberg\von Majed\IMARIS\Microfetti\Ki-67 quantification\Data\1w\KGE3319\20241106_kge-3319_l5_1w_a_series001_b_series004.ims
153	µm	Surface	Position	349	µm	Surface	Position	10400	µm	Surface	Position	0	25	0	1	CFP	700001	71	CFP	700001	20241106_kge-3319_l5_1w_a_series001_b_series004.ims	S:\AG\AG-Endres\Daten\Gertz-Kronenberg\von Majed\IMARIS\Microfetti\Ki-67 quantification\Data\1w\KGE3319\20241106_kge-3319_l5_1w_a_series001_b_series004.ims
215	µm	Surface	Position	198	µm	Surface	Position	10400	µm	Surface	Position	0	26	0	1	CFP	700001	74	CFP	700001	20241106_kge-3319_l5_1w_a_series001_b_series004.ims	S:\AG\AG-Endres\Daten\Gertz-Kronenberg\von Majed\IMARIS\Microfetti\Ki-67 quantification\Data\1w\KGE3319\20241106_kge-3319_l5_1w_a_series001_b_series004.ims
232	µm	Surface	Position	159	µm	Surface	Position	10400	µm	Surface	Position	0	27	0	1	CFP	700001	75	CFP	700001	20241106_kge-3319_l5_1w_a_series001_b_series004.ims	S:\AG\AG-Endres\Daten\Gertz-Kronenberg\von Majed\IMARIS\Microfetti\Ki-67 quantification\Data\1w\KGE3319\20241106_kge-3319_l5_1w_a_series001_b_series004.ims
134	µm	Surface	Position	252	µm	Surface	Position	10400	µm	Surface	Position	0	28	0	1	CFP	700001	76	CFP	700001	20241106_kge-3319_l5_1w_a_series001_b_series004.ims	S:\AG\AG-Endres\Daten\Gertz-Kronenberg\von Majed\IMARIS\Microfetti\Ki-67 quantification\Data\1w\KGE3319\20241106_kge-3319_l5_1w_a_series001_b_series004.ims
337	µm	Surface	Position	344	µm	Surface	Position	10400	µm	Surface	Position	0	29	0	1	CFP	700001	26	CFP	700001	20241106_kge-3319_l5_1w_a_series001_c_series006.ims	S:\AG\AG-Endres\Daten\Gertz-Kronenberg\von Majed\IMARIS\Microfetti\Ki-67 quantification\Data\1w\KGE3319\20241106_kge-3319_l5_1w_a_series001_c_series006.ims
256	µm	Surface	Position	269	µm	Surface	Position	10400	µm	Surface	Position	0	30	0	1	CFP	700001	35	CFP	700001	20241106_kge-3319_l5_1w_a_series001_c_series006.ims	S:\AG\AG-Endres\Daten\Gertz-Kronenberg\von Majed\IMARIS\Microfetti\Ki-67 quantification\Data\1w\KGE3319\20241106_kge-3319_l5_1w_a_series001_c_series006.ims
276	µm	Surface	Position	248	µm	Surface	Position	10400	µm	Surface	Position	0	31	0	1	CFP	700001	36	CFP	700001	20241106_kge-3319_l5_1w_a_series001_c_series006.ims	S:\AG\AG-Endres\Daten\Gertz-Kronenberg\von Majed\IMARIS\Microfetti\Ki-67 quantification\Data\1w\KGE3319\20241106_kge-3319_l5_1w_a_series001_c_series006.ims
312	µm	Surface	Position	194	µm	Surface	Position	10400	µm	Surface	Position	0	32	0	1	CFP	700001	37	CFP	700001	20241106_kge-3319_l5_1w_a_series001_c_series006.ims	S:\AG\AG-Endres\Daten\Gertz-Kronenberg\von Majed\IMARIS\Microfetti\Ki-67 quantification\Data\1w\KGE3319\20241106_kge-3319_l5_1w_a_series001_c_series006.ims
273	µm	Surface	Position	261	µm	Surface	Position	10400	µm	Surface	Position	0	33	0	1	CFP	700001	39	CFP	700001	20241106_kge-3319_l5_1w_a_series001_c_series006.ims	S:\AG\AG-Endres\Daten\Gertz-Kronenberg\von Majed\IMARIS\Microfetti\Ki-67 quantification\Data\1w\KGE3319\20241106_kge-3319_l5_1w_a_series001_c_series006.ims
258	µm	Surface	Position	255	µm	Surface	Position	10400	µm	Surface	Position	0	34	0	1	CFP	700001	47	CFP	700001	20241106_kge-3319_l5_1w_a_series001_c_series006.ims	S:\AG\AG-Endres\Daten\Gertz-Kronenberg\von Majed\IMARIS\Microfetti\Ki-67 quantification\Data\1w\KGE3319\20241106_kge-3319_l5_1w_a_series001_c_series006.ims
97.4	µm	Surface	Position	208	µm	Surface	Position	10400	µm	Surface	Position	0	35	0	1	CFP	700001	61	CFP	700001	20241106_kge-3319_l5_1w_a_series001_c_series006.ims	S:\AG\AG-Endres\Daten\Gertz-Kronenberg\von Majed\IMARIS\Microfetti\Ki-67 quantification\Data\1w\KGE3319\20241106_kge-3319_l5_1w_a_series001_c_series006.ims
150	µm	Surface	Position	4.81	µm	Surface	Position	10400	µm	Surface	Position	0	36	0	1	CFP	700001	82	CFP	700001	20241106_kge-3319_l5_1w_a_series001_c_series006.ims	S:\AG\AG-Endres\Daten\Gertz-Kronenberg\von Majed\IMARIS\Microfetti\Ki-67 quantification\Data\1w\KGE3319\20241106_kge-3319_l5_1w_a_series001_c_series006.ims
198	µm	Surface	Position	5.54	µm	Surface	Position	10400	µm	Surface	Position	0	37	0	1	CFP	700001	85	CFP	700001	20241106_kge-3319_l5_1w_a_series001_c_series006.ims	S:\AG\AG-Endres\Daten\Gertz-Kronenberg\von Majed\IMARIS\Microfetti\Ki-67 quantification\Data\1w\KGE3319\20241106_kge-3319_l5_1w_a_series001_c_series006.ims
91.7	µm	Surface	Position	205	µm	Surface	Position	10400	µm	Surface	Position	0	38	0	1	CFP	700001	94	CFP	700001	20241106_kge-3319_l5_1w_a_series001_c_series006.ims	S:\AG\AG-Endres\Daten\Gertz-Kronenberg\von Majed\IMARIS\Microfetti\Ki-67 quantification\Data\1w\KGE3319\20241106_kge-3319_l5_1w_a_series001_c_series006.ims
361	µm	Surface	Position	240	µm	Surface	Position	10400	µm	Surface	Position	0	39	0	1	CFP	700001	5	CFP	700001	20241106_kge-3319_l5_1w_a_series001_d_series008.ims	S:\AG\AG-Endres\Daten\Gertz-Kronenberg\von Majed\IMARIS\Microfetti\Ki-67 quantification\Data\1w\KGE3319\20241106_kge-3319_l5_1w_a_series001_d_series008.ims
269	µm	Surface	Position	344	µm	Surface	Position	10400	µm	Surface	Position	0	40	0	1	CFP	700001	17	CFP	700001	20241106_kge-3319_l5_1w_a_series001_d_series008.ims	S:\AG\AG-Endres\Daten\Gertz-Kronenberg\von Majed\IMARIS\Microfetti\Ki-67 quantification\Data\1w\KGE3319\20241106_kge-3319_l5_1w_a_series001_d_series008.ims
178	µm	Surface	Position	312	µm	Surface	Position	10400	µm	Surface	Position	0	41	0	1	CFP	700001	42	CFP	700001	20241106_kge-3319_l5_1w_a_series001_d_series008.ims	S:\AG\AG-Endres\Daten\Gertz-Kronenberg\von Majed\IMARIS\Microfetti\Ki-67 quantification\Data\1w\KGE3319\20241106_kge-3319_l5_1w_a_series001_d_series008.ims
247	µm	Surface	Position	267	µm	Surface	Position	10400	µm	Surface	Position	0	42	0	1	CFP	700001	45	CFP	700001	20241106_kge-3319_l5_1w_a_series001_d_series008.ims	S:\AG\AG-Endres\Daten\Gertz-Kronenberg\von Majed\IMARIS\Microfetti\Ki-67 quantification\Data\1w\KGE3319\20241106_kge-3319_l5_1w_a_series001_d_series008.ims
84	µm	Surface	Position	361	µm	Surface	Position	10400	µm	Surface	Position	1	43	0	1	CFP	700001	60	CFP	700001	20241106_kge-3319_l5_1w_a_series001_d_series008.ims	S:\AG\AG-Endres\Daten\Gertz-Kronenberg\von Majed\IMARIS\Microfetti\Ki-67 quantification\Data\1w\KGE3319\20241106_kge-3319_l5_1w_a_series001_d_series008.ims
228	µm	Surface	Position	105	µm	Surface	Position	10400	µm	Surface	Position	0	44	0	1	CFP	700001	89	CFP	700001	20241106_kge-3319_l5_1w_a_series001_d_series008.ims	S:\AG\AG-Endres\Daten\Gertz-Kronenberg\von Majed\IMARIS\Microfetti\Ki-67 quantification\Data\1w\KGE3319\20241106_kge-3319_l5_1w_a_series001_d_series008.ims
235	µm	Surface	Position	47.6	µm	Surface	Position	10400	µm	Surface	Position	0	45	0	1	CFP	700001	100	CFP	700001	20241106_kge-3319_l5_1w_a_series001_d_series008.ims	S:\AG\AG-Endres\Daten\Gertz-Kronenberg\von Majed\IMARIS\Microfetti\Ki-67 quantification\Data\1w\KGE3319\20241106_kge-3319_l5_1w_a_series001_d_series008.ims
5.18	µm	Surface	Position	36.7	µm	Surface	Position	10400	µm	Surface	Position	0	46	0	1	CFP	700001	140	CFP	700001	20241106_kge-3319_l5_1w_a_series001_d_series008.ims	S:\AG\AG-Endres\Daten\Gertz-Kronenberg\von Majed\IMARIS\Microfetti\Ki-67 quantification\Data\1w\KGE3319\20241106_kge-3319_l5_1w_a_series001_d_series008.ims
195	µm	Surface	Position	318	µm	Surface	Position	10400	µm	Surface	Position	0	47	0	1	CFP	700001	146	CFP	700001	20241106_kge-3319_l5_1w_a_series001_d_series008.ims	S:\AG\AG-Endres\Daten\Gertz-Kronenberg\von Majed\IMARIS\Microfetti\Ki-67 quantification\Data\1w\KGE3319\20241106_kge-3319_l5_1w_a_series001_d_series008.ims
118	µm	Surface	Position	316	µm	Surface	Position	10400	µm	Surface	Position	0	48	0	1	CFP	700001	3	CFP	700001	20241106_kge-3319_l5_1w_a_series001_e_series010.ims	S:\AG\AG-Endres\Daten\Gertz-Kronenberg\von Majed\IMARIS\Microfetti\Ki-67 quantification\Data\1w\KGE3319\20241106_kge-3319_l5_1w_a_series001_e_series010.ims
175	µm	Surface	Position	228	µm	Surface	Position	10400	µm	Surface	Position	0	49	0	1	CFP	700001	5	CFP	700001	20241106_kge-3319_l5_1w_a_series001_e_series010.ims	S:\AG\AG-Endres\Daten\Gertz-Kronenberg\von Majed\IMARIS\Microfetti\Ki-67 quantification\Data\1w\KGE3319\20241106_kge-3319_l5_1w_a_series001_e_series010.ims
152	µm	Surface	Position	211	µm	Surface	Position	10400	µm	Surface	Position	0	50	0	1	CFP	700001	9	CFP	700001	20241106_kge-3319_l5_1w_a_series001_e_series010.ims	S:\AG\AG-Endres\Daten\Gertz-Kronenberg\von Majed\IMARIS\Microfetti\Ki-67 quantification\Data\1w\KGE3319\20241106_kge-3319_l5_1w_a_series001_e_series010.ims
129	µm	Surface	Position	212	µm	Surface	Position	10400	µm	Surface	Position	1	51	0	1	CFP	700001	17	CFP	700001	20241106_kge-3319_l5_1w_a_series001_e_series010.ims	S:\AG\AG-Endres\Daten\Gertz-Kronenberg\von Majed\IMARIS\Microfetti\Ki-67 quantification\Data\1w\KGE3319\20241106_kge-3319_l5_1w_a_series001_e_series010.ims
241	µm	Surface	Position	53.1	µm	Surface	Position	10400	µm	Surface	Position	0	52	0	1	CFP	700001	22	CFP	700001	20241106_kge-3319_l5_1w_a_series001_e_series010.ims	S:\AG\AG-Endres\Daten\Gertz-Kronenberg\von Majed\IMARIS\Microfetti\Ki-67 quantification\Data\1w\KGE3319\20241106_kge-3319_l5_1w_a_series001_e_series010.ims
246	µm	Surface	Position	35.7	µm	Surface	Position	10400	µm	Surface	Position	0	53	0	1	CFP	700001	25	CFP	700001	20241106_kge-3319_l5_1w_a_series001_e_series010.ims	S:\AG\AG-Endres\Daten\Gertz-Kronenberg\von Majed\IMARIS\Microfetti\Ki-67 quantification\Data\1w\KGE3319\20241106_kge-3319_l5_1w_a_series001_e_series010.ims
214	µm	Surface	Position	9.51	µm	Surface	Position	10400	µm	Surface	Position	1	54	0	1	CFP	700001	28	CFP	700001	20241106_kge-3319_l5_1w_a_series001_e_series010.ims	S:\AG\AG-Endres\Daten\Gertz-Kronenberg\von Majed\IMARIS\Microfetti\Ki-67 quantification\Data\1w\KGE3319\20241106_kge-3319_l5_1w_a_series001_e_series010.ims
20.1	µm	Surface	Position	212	µm	Surface	Position	10400	µm	Surface	Position	0	55	0	1	CFP	700001	30	CFP	700001	20241106_kge-3319_l5_1w_a_series001_e_series010.ims	S:\AG\AG-Endres\Daten\Gertz-Kronenberg\von Majed\IMARIS\Microfetti\Ki-67 quantification\Data\1w\KGE3319\20241106_kge-3319_l5_1w_a_series001_e_series010.ims
315	µm	Surface	Position	200	µm	Surface	Position	10400	µm	Surface	Position	0	56	0	1	CFP	700001	2	CFP	700001	20241106_kge-3320_l5_1w_a_series001_a_series001.ims	S:\AG\AG-Endres\Daten\Gertz-Kronenberg\von Majed\IMARIS\Microfetti\Ki-67 quantification\Data\1w\KGE3320\20241106_kge-3320_l5_1w_a_series001_a_series001.ims
145	µm	Surface	Position	342	µm	Surface	Position	10400	µm	Surface	Position	0	57	0	1	CFP	700001	4	CFP	700001	20241106_kge-3320_l5_1w_a_series001_a_series001.ims	S:\AG\AG-Endres\Daten\Gertz-Kronenberg\von Majed\IMARIS\Microfetti\Ki-67 quantification\Data\1w\KGE3320\20241106_kge-3320_l5_1w_a_series001_a_series001.ims
314	µm	Surface	Position	150	µm	Surface	Position	10400	µm	Surface	Position	0	58	0	1	CFP	700001	8	CFP	700001	20241106_kge-3320_l5_1w_a_series001_a_series001.ims	S:\AG\AG-Endres\Daten\Gertz-Kronenberg\von Majed\IMARIS\Microfetti\Ki-67 quantification\Data\1w\KGE3320\20241106_kge-3320_l5_1w_a_series001_a_series001.ims
316	µm	Surface	Position	126	µm	Surface	Position	10400	µm	Surface	Position	0	59	0	1	CFP	700001	9	CFP	700001	20241106_kge-3320_l5_1w_a_series001_a_series001.ims	S:\AG\AG-Endres\Daten\Gertz-Kronenberg\von Majed\IMARIS\Microfetti\Ki-67 quantification\Data\1w\KGE3320\20241106_kge-3320_l5_1w_a_series001_a_series001.ims
275	µm	Surface	Position	153	µm	Surface	Position	10400	µm	Surface	Position	0	60	0	1	CFP	700001	10	CFP	700001	20241106_kge-3320_l5_1w_a_series001_a_series001.ims	S:\AG\AG-Endres\Daten\Gertz-Kronenberg\von Majed\IMARIS\Microfetti\Ki-67 quantification\Data\1w\KGE3320\20241106_kge-3320_l5_1w_a_series001_a_series001.ims
290	µm	Surface	Position	113	µm	Surface	Position	10400	µm	Surface	Position	0	61	0	1	CFP	700001	18	CFP	700001	20241106_kge-3320_l5_1w_a_series001_a_series001.ims	S:\AG\AG-Endres\Daten\Gertz-Kronenberg\von Majed\IMARIS\Microfetti\Ki-67 quantification\Data\1w\KGE3320\20241106_kge-3320_l5_1w_a_series001_a_series001.ims
320	µm	Surface	Position	92.7	µm	Surface	Position	10400	µm	Surface	Position	0	62	0	1	CFP	700001	20	CFP	700001	20241106_kge-3320_l5_1w_a_series001_a_series001.ims	S:\AG\AG-Endres\Daten\Gertz-Kronenberg\von Majed\IMARIS\Microfetti\Ki-67 quantification\Data\1w\KGE3320\20241106_kge-3320_l5_1w_a_series001_a_series001.ims
188	µm	Surface	Position	115	µm	Surface	Position	10400	µm	Surface	Position	0	63	0	1	CFP	700001	26	CFP	700001	20241106_kge-3320_l5_1w_a_series001_a_series001.ims	S:\AG\AG-Endres\Daten\Gertz-Kronenberg\von Majed\IMARIS\Microfetti\Ki-67 quantification\Data\1w\KGE3320\20241106_kge-3320_l5_1w_a_series001_a_series001.ims
189	µm	Surface	Position	123	µm	Surface	Position	10400	µm	Surface	Position	0	64	0	1	CFP	700001	27	CFP	700001	20241106_kge-3320_l5_1w_a_series001_a_series001.ims	S:\AG\AG-Endres\Daten\Gertz-Kronenberg\von Majed\IMARIS\Microfetti\Ki-67 quantification\Data\1w\KGE3320\20241106_kge-3320_l5_1w_a_series001_a_series001.ims
175	µm	Surface	Position	123	µm	Surface	Position	10400	µm	Surface	Position	0	65	0	1	CFP	700001	32	CFP	700001	20241106_kge-3320_l5_1w_a_series001_a_series001.ims	S:\AG\AG-Endres\Daten\Gertz-Kronenberg\von Majed\IMARIS\Microfetti\Ki-67 quantification\Data\1w\KGE3320\20241106_kge-3320_l5_1w_a_series001_a_series001.ims
8.57	µm	Surface	Position	253	µm	Surface	Position	10400	µm	Surface	Position	0	66	0	1	CFP	700001	35	CFP	700001	20241106_kge-3320_l5_1w_a_series001_a_series001.ims	S:\AG\AG-Endres\Daten\Gertz-Kronenberg\von Majed\IMARIS\Microfetti\Ki-67 quantification\Data\1w\KGE3320\20241106_kge-3320_l5_1w_a_series001_a_series001.ims
162	µm	Surface	Position	125	µm	Surface	Position	10400	µm	Surface	Position	0	67	0	1	CFP	700001	37	CFP	700001	20241106_kge-3320_l5_1w_a_series001_a_series001.ims	S:\AG\AG-Endres\Daten\Gertz-Kronenberg\von Majed\IMARIS\Microfetti\Ki-67 quantification\Data\1w\KGE3320\20241106_kge-3320_l5_1w_a_series001_a_series001.ims
99.5	µm	Surface	Position	115	µm	Surface	Position	10400	µm	Surface	Position	0	68	0	1	CFP	700001	38	CFP	700001	20241106_kge-3320_l5_1w_a_series001_a_series001.ims	S:\AG\AG-Endres\Daten\Gertz-Kronenberg\von Majed\IMARIS\Microfetti\Ki-67 quantification\Data\1w\KGE3320\20241106_kge-3320_l5_1w_a_series001_a_series001.ims
295	µm	Surface	Position	364	µm	Surface	Position	10400	µm	Surface	Position	0	69	0	1	CFP	700001	45	CFP	700001	20241106_kge-3320_l5_1w_a_series001_a_series001.ims	S:\AG\AG-Endres\Daten\Gertz-Kronenberg\von Majed\IMARIS\Microfetti\Ki-67 quantification\Data\1w\KGE3320\20241106_kge-3320_l5_1w_a_series001_a_series001.ims
86.9	µm	Surface	Position	355	µm	Surface	Position	10400	µm	Surface	Position	0	70	0	1	CFP	700001	15	CFP	700001	20241106_kge-3320_l5_1w_a_series001_b_series003.ims	S:\AG\AG-Endres\Daten\Gertz-Kronenberg\von Majed\IMARIS\Microfetti\Ki-67 quantification\Data\1w\KGE3320\20241106_kge-3320_l5_1w_a_series001_b_series003.ims
218	µm	Surface	Position	176	µm	Surface	Position	10400	µm	Surface	Position	0	71	0	1	CFP	700001	24	CFP	700001	20241106_kge-3320_l5_1w_a_series001_b_series003.ims	S:\AG\AG-Endres\Daten\Gertz-Kronenberg\von Majed\IMARIS\Microfetti\Ki-67 quantification\Data\1w\KGE3320\20241106_kge-3320_l5_1w_a_series001_b_series003.ims
61.6	µm	Surface	Position	342	µm	Surface	Position	10400	µm	Surface	Position	1	72	0	1	CFP	700001	25	CFP	700001	20241106_kge-3320_l5_1w_a_series001_b_series003.ims	S:\AG\AG-Endres\Daten\Gertz-Kronenberg\von Majed\IMARIS\Microfetti\Ki-67 quantification\Data\1w\KGE3320\20241106_kge-3320_l5_1w_a_series001_b_series003.ims
175	µm	Surface	Position	167	µm	Surface	Position	10400	µm	Surface	Position	0	73	0	1	CFP	700001	31	CFP	700001	20241106_kge-3320_l5_1w_a_series001_b_series003.ims	S:\AG\AG-Endres\Daten\Gertz-Kronenberg\von Majed\IMARIS\Microfetti\Ki-67 quantification\Data\1w\KGE3320\20241106_kge-3320_l5_1w_a_series001_b_series003.ims
85.8	µm	Surface	Position	127	µm	Surface	Position	10400	µm	Surface	Position	0	74	0	1	CFP	700001	33	CFP	700001	20241106_kge-3320_l5_1w_a_series001_b_series003.ims	S:\AG\AG-Endres\Daten\Gertz-Kronenberg\von Majed\IMARIS\Microfetti\Ki-67 quantification\Data\1w\KGE3320\20241106_kge-3320_l5_1w_a_series001_b_series003.ims
15.9	µm	Surface	Position	192	µm	Surface	Position	10400	µm	Surface	Position	0	75	0	1	CFP	700001	36	CFP	700001	20241106_kge-3320_l5_1w_a_series001_b_series003.ims	S:\AG\AG-Endres\Daten\Gertz-Kronenberg\von Majed\IMARIS\Microfetti\Ki-67 quantification\Data\1w\KGE3320\20241106_kge-3320_l5_1w_a_series001_b_series003.ims
54.9	µm	Surface	Position	105	µm	Surface	Position	10400	µm	Surface	Position	0	76	0	1	CFP	700001	38	CFP	700001	20241106_kge-3320_l5_1w_a_series001_b_series003.ims	S:\AG\AG-Endres\Daten\Gertz-Kronenberg\von Majed\IMARIS\Microfetti\Ki-67 quantification\Data\1w\KGE3320\20241106_kge-3320_l5_1w_a_series001_b_series003.ims
71.8	µm	Surface	Position	7.22	µm	Surface	Position	10400	µm	Surface	Position	0	77	0	1	CFP	700001	42	CFP	700001	20241106_kge-3320_l5_1w_a_series001_b_series003.ims	S:\AG\AG-Endres\Daten\Gertz-Kronenberg\von Majed\IMARIS\Microfetti\Ki-67 quantification\Data\1w\KGE3320\20241106_kge-3320_l5_1w_a_series001_b_series003.ims
78.5	µm	Surface	Position	11.9	µm	Surface	Position	10400	µm	Surface	Position	0	78	0	1	CFP	700001	43	CFP	700001	20241106_kge-3320_l5_1w_a_series001_b_series003.ims	S:\AG\AG-Endres\Daten\Gertz-Kronenberg\von Majed\IMARIS\Microfetti\Ki-67 quantification\Data\1w\KGE3320\20241106_kge-3320_l5_1w_a_series001_b_series003.ims
57.1	µm	Surface	Position	76.7	µm	Surface	Position	10400	µm	Surface	Position	0	79	0	1	CFP	700001	45	CFP	700001	20241106_kge-3320_l5_1w_a_series001_b_series003.ims	S:\AG\AG-Endres\Daten\Gertz-Kronenberg\von Majed\IMARIS\Microfetti\Ki-67 quantification\Data\1w\KGE3320\20241106_kge-3320_l5_1w_a_series001_b_series003.ims
31.4	µm	Surface	Position	99.1	µm	Surface	Position	10400	µm	Surface	Position	0	80	0	1	CFP	700001	46	CFP	700001	20241106_kge-3320_l5_1w_a_series001_b_series003.ims	S:\AG\AG-Endres\Daten\Gertz-Kronenberg\von Majed\IMARIS\Microfetti\Ki-67 quantification\Data\1w\KGE3320\20241106_kge-3320_l5_1w_a_series001_b_series003.ims
90.8	µm	Surface	Position	322	µm	Surface	Position	10400	µm	Surface	Position	0	81	0	1	CFP	700001	57	CFP	700001	20241106_kge-3320_l5_1w_a_series001_b_series003.ims	S:\AG\AG-Endres\Daten\Gertz-Kronenberg\von Majed\IMARIS\Microfetti\Ki-67 quantification\Data\1w\KGE3320\20241106_kge-3320_l5_1w_a_series001_b_series003.ims
322	µm	Surface	Position	302	µm	Surface	Position	10400	µm	Surface	Position	0	82	0	1	CFP	700001	44	CFP	700001	20241106_kge-3320_l5_1w_a_series001_c_series005.ims	S:\AG\AG-Endres\Daten\Gertz-Kronenberg\von Majed\IMARIS\Microfetti\Ki-67 quantification\Data\1w\KGE3320\20241106_kge-3320_l5_1w_a_series001_c_series005.ims
302	µm	Surface	Position	336	µm	Surface	Position	10400	µm	Surface	Position	0	83	0	1	CFP	700001	45	CFP	700001	20241106_kge-3320_l5_1w_a_series001_c_series005.ims	S:\AG\AG-Endres\Daten\Gertz-Kronenberg\von Majed\IMARIS\Microfetti\Ki-67 quantification\Data\1w\KGE3320\20241106_kge-3320_l5_1w_a_series001_c_series005.ims
298	µm	Surface	Position	310	µm	Surface	Position	10400	µm	Surface	Position	0	84	0	1	CFP	700001	48	CFP	700001	20241106_kge-3320_l5_1w_a_series001_c_series005.ims	S:\AG\AG-Endres\Daten\Gertz-Kronenberg\von Majed\IMARIS\Microfetti\Ki-67 quantification\Data\1w\KGE3320\20241106_kge-3320_l5_1w_a_series001_c_series005.ims
262	µm	Surface	Position	158	µm	Surface	Position	10400	µm	Surface	Position	0	85	0	1	CFP	700001	57	CFP	700001	20241106_kge-3320_l5_1w_a_series001_c_series005.ims	S:\AG\AG-Endres\Daten\Gertz-Kronenberg\von Majed\IMARIS\Microfetti\Ki-67 quantification\Data\1w\KGE3320\20241106_kge-3320_l5_1w_a_series001_c_series005.ims
122	µm	Surface	Position	286	µm	Surface	Position	10400	µm	Surface	Position	0	86	0	1	CFP	700001	60	CFP	700001	20241106_kge-3320_l5_1w_a_series001_c_series005.ims	S:\AG\AG-Endres\Daten\Gertz-Kronenberg\von Majed\IMARIS\Microfetti\Ki-67 quantification\Data\1w\KGE3320\20241106_kge-3320_l5_1w_a_series001_c_series005.ims
223	µm	Surface	Position	150	µm	Surface	Position	10400	µm	Surface	Position	0	87	0	1	CFP	700001	61	CFP	700001	20241106_kge-3320_l5_1w_a_series001_c_series005.ims	S:\AG\AG-Endres\Daten\Gertz-Kronenberg\von Majed\IMARIS\Microfetti\Ki-67 quantification\Data\1w\KGE3320\20241106_kge-3320_l5_1w_a_series001_c_series005.ims
139	µm	Surface	Position	249	µm	Surface	Position	10400	µm	Surface	Position	0	88	0	1	CFP	700001	65	CFP	700001	20241106_kge-3320_l5_1w_a_series001_c_series005.ims	S:\AG\AG-Endres\Daten\Gertz-Kronenberg\von Majed\IMARIS\Microfetti\Ki-67 quantification\Data\1w\KGE3320\20241106_kge-3320_l5_1w_a_series001_c_series005.ims
228	µm	Surface	Position	131	µm	Surface	Position	10400	µm	Surface	Position	1	89	0	1	CFP	700001	67	CFP	700001	20241106_kge-3320_l5_1w_a_series001_c_series005.ims	S:\AG\AG-Endres\Daten\Gertz-Kronenberg\von Majed\IMARIS\Microfetti\Ki-67 quantification\Data\1w\KGE3320\20241106_kge-3320_l5_1w_a_series001_c_series005.ims
207	µm	Surface	Position	127	µm	Surface	Position	10400	µm	Surface	Position	1	90	0	1	CFP	700001	75	CFP	700001	20241106_kge-3320_l5_1w_a_series001_c_series005.ims	S:\AG\AG-Endres\Daten\Gertz-Kronenberg\von Majed\IMARIS\Microfetti\Ki-67 quantification\Data\1w\KGE3320\20241106_kge-3320_l5_1w_a_series001_c_series005.ims
66.1	µm	Surface	Position	209	µm	Surface	Position	10400	µm	Surface	Position	0	91	0	1	CFP	700001	83	CFP	700001	20241106_kge-3320_l5_1w_a_series001_c_series005.ims	S:\AG\AG-Endres\Daten\Gertz-Kronenberg\von Majed\IMARIS\Microfetti\Ki-67 quantification\Data\1w\KGE3320\20241106_kge-3320_l5_1w_a_series001_c_series005.ims
65.5	µm	Surface	Position	229	µm	Surface	Position	10400	µm	Surface	Position	0	92	0	1	CFP	700001	87	CFP	700001	20241106_kge-3320_l5_1w_a_series001_c_series005.ims	S:\AG\AG-Endres\Daten\Gertz-Kronenberg\von Majed\IMARIS\Microfetti\Ki-67 quantification\Data\1w\KGE3320\20241106_kge-3320_l5_1w_a_series001_c_series005.ims
71.2	µm	Surface	Position	183	µm	Surface	Position	10400	µm	Surface	Position	0	93	0	1	CFP	700001	88	CFP	700001	20241106_kge-3320_l5_1w_a_series001_c_series005.ims	S:\AG\AG-Endres\Daten\Gertz-Kronenberg\von Majed\IMARIS\Microfetti\Ki-67 quantification\Data\1w\KGE3320\20241106_kge-3320_l5_1w_a_series001_c_series005.ims
137	µm	Surface	Position	66.8	µm	Surface	Position	10400	µm	Surface	Position	0	94	0	1	CFP	700001	90	CFP	700001	20241106_kge-3320_l5_1w_a_series001_c_series005.ims	S:\AG\AG-Endres\Daten\Gertz-Kronenberg\von Majed\IMARIS\Microfetti\Ki-67 quantification\Data\1w\KGE3320\20241106_kge-3320_l5_1w_a_series001_c_series005.ims
177	µm	Surface	Position	37.7	µm	Surface	Position	10400	µm	Surface	Position	0	95	0	1	CFP	700001	91	CFP	700001	20241106_kge-3320_l5_1w_a_series001_c_series005.ims	S:\AG\AG-Endres\Daten\Gertz-Kronenberg\von Majed\IMARIS\Microfetti\Ki-67 quantification\Data\1w\KGE3320\20241106_kge-3320_l5_1w_a_series001_c_series005.ims
118	µm	Surface	Position	37.2	µm	Surface	Position	10400	µm	Surface	Position	0	96	0	1	CFP	700001	94	CFP	700001	20241106_kge-3320_l5_1w_a_series001_c_series005.ims	S:\AG\AG-Endres\Daten\Gertz-Kronenberg\von Majed\IMARIS\Microfetti\Ki-67 quantification\Data\1w\KGE3320\20241106_kge-3320_l5_1w_a_series001_c_series005.ims
130	µm	Surface	Position	26.3	µm	Surface	Position	10400	µm	Surface	Position	0	97	0	1	CFP	700001	95	CFP	700001	20241106_kge-3320_l5_1w_a_series001_c_series005.ims	S:\AG\AG-Endres\Daten\Gertz-Kronenberg\von Majed\IMARIS\Microfetti\Ki-67 quantification\Data\1w\KGE3320\20241106_kge-3320_l5_1w_a_series001_c_series005.ims
63.9	µm	Surface	Position	89.3	µm	Surface	Position	10400	µm	Surface	Position	0	98	0	1	CFP	700001	96	CFP	700001	20241106_kge-3320_l5_1w_a_series001_c_series005.ims	S:\AG\AG-Endres\Daten\Gertz-Kronenberg\von Majed\IMARIS\Microfetti\Ki-67 quantification\Data\1w\KGE3320\20241106_kge-3320_l5_1w_a_series001_c_series005.ims
55.3	µm	Surface	Position	108	µm	Surface	Position	10400	µm	Surface	Position	0	99	0	1	CFP	700001	98	CFP	700001	20241106_kge-3320_l5_1w_a_series001_c_series005.ims	S:\AG\AG-Endres\Daten\Gertz-Kronenberg\von Majed\IMARIS\Microfetti\Ki-67 quantification\Data\1w\KGE3320\20241106_kge-3320_l5_1w_a_series001_c_series005.ims
30.2	µm	Surface	Position	129	µm	Surface	Position	10400	µm	Surface	Position	1	100	0	1	CFP	700001	99	CFP	700001	20241106_kge-3320_l5_1w_a_series001_c_series005.ims	S:\AG\AG-Endres\Daten\Gertz-Kronenberg\von Majed\IMARIS\Microfetti\Ki-67 quantification\Data\1w\KGE3320\20241106_kge-3320_l5_1w_a_series001_c_series005.ims
47.1	µm	Surface	Position	129	µm	Surface	Position	10400	µm	Surface	Position	1	101	0	1	CFP	700001	100	CFP	700001	20241106_kge-3320_l5_1w_a_series001_c_series005.ims	S:\AG\AG-Endres\Daten\Gertz-Kronenberg\von Majed\IMARIS\Microfetti\Ki-67 quantification\Data\1w\KGE3320\20241106_kge-3320_l5_1w_a_series001_c_series005.ims
155	µm	Surface	Position	28.2	µm	Surface	Position	10400	µm	Surface	Position	0	102	0	1	CFP	700001	101	CFP	700001	20241106_kge-3320_l5_1w_a_series001_c_series005.ims	S:\AG\AG-Endres\Daten\Gertz-Kronenberg\von Majed\IMARIS\Microfetti\Ki-67 quantification\Data\1w\KGE3320\20241106_kge-3320_l5_1w_a_series001_c_series005.ims
164	µm	Surface	Position	9.83	µm	Surface	Position	10400	µm	Surface	Position	0	103	0	1	CFP	700001	102	CFP	700001	20241106_kge-3320_l5_1w_a_series001_c_series005.ims	S:\AG\AG-Endres\Daten\Gertz-Kronenberg\von Majed\IMARIS\Microfetti\Ki-67 quantification\Data\1w\KGE3320\20241106_kge-3320_l5_1w_a_series001_c_series005.ims
266	µm	Surface	Position	131	µm	Surface	Position	10400	µm	Surface	Position	1	104	0	1	CFP	700001	110	CFP	700001	20241106_kge-3320_l5_1w_a_series001_c_series005.ims	S:\AG\AG-Endres\Daten\Gertz-Kronenberg\von Majed\IMARIS\Microfetti\Ki-67 quantification\Data\1w\KGE3320\20241106_kge-3320_l5_1w_a_series001_c_series005.ims
258	µm	Surface	Position	133	µm	Surface	Position	10400	µm	Surface	Position	1	105	0	1	CFP	700001	125	CFP	700001	20241106_kge-3320_l5_1w_a_series001_c_series005.ims	S:\AG\AG-Endres\Daten\Gertz-Kronenberg\von Majed\IMARIS\Microfetti\Ki-67 quantification\Data\1w\KGE3320\20241106_kge-3320_l5_1w_a_series001_c_series005.ims
94.8	µm	Surface	Position	271	µm	Surface	Position	10400	µm	Surface	Position	0	106	0	1	CFP	700001	139	CFP	700001	20241106_kge-3320_l5_1w_a_series001_c_series005.ims	S:\AG\AG-Endres\Daten\Gertz-Kronenberg\von Majed\IMARIS\Microfetti\Ki-67 quantification\Data\1w\KGE3320\20241106_kge-3320_l5_1w_a_series001_c_series005.ims
150	µm	Surface	Position	263	µm	Surface	Position	10400	µm	Surface	Position	0	107	0	1	CFP	700001	140	CFP	700001	20241106_kge-3320_l5_1w_a_series001_c_series005.ims	S:\AG\AG-Endres\Daten\Gertz-Kronenberg\von Majed\IMARIS\Microfetti\Ki-67 quantification\Data\1w\KGE3320\20241106_kge-3320_l5_1w_a_series001_c_series005.ims
336	µm	Surface	Position	311	µm	Surface	Position	10400	µm	Surface	Position	0	108	0	1	CFP	700001	1	CFP	700001	20241106_kge-3320_l5_1w_a_series001_d_series007.ims	S:\AG\AG-Endres\Daten\Gertz-Kronenberg\von Majed\IMARIS\Microfetti\Ki-67 quantification\Data\1w\KGE3320\20241106_kge-3320_l5_1w_a_series001_d_series007.ims
360	µm	Surface	Position	283	µm	Surface	Position	10400	µm	Surface	Position	0	109	0	1	CFP	700001	3	CFP	700001	20241106_kge-3320_l5_1w_a_series001_d_series007.ims	S:\AG\AG-Endres\Daten\Gertz-Kronenberg\von Majed\IMARIS\Microfetti\Ki-67 quantification\Data\1w\KGE3320\20241106_kge-3320_l5_1w_a_series001_d_series007.ims
357	µm	Surface	Position	295	µm	Surface	Position	10400	µm	Surface	Position	0	110	0	1	CFP	700001	4	CFP	700001	20241106_kge-3320_l5_1w_a_series001_d_series007.ims	S:\AG\AG-Endres\Daten\Gertz-Kronenberg\von Majed\IMARIS\Microfetti\Ki-67 quantification\Data\1w\KGE3320\20241106_kge-3320_l5_1w_a_series001_d_series007.ims
363	µm	Surface	Position	336	µm	Surface	Position	10400	µm	Surface	Position	1	111	0	1	CFP	700001	10	CFP	700001	20241106_kge-3320_l5_1w_a_series001_d_series007.ims	S:\AG\AG-Endres\Daten\Gertz-Kronenberg\von Majed\IMARIS\Microfetti\Ki-67 quantification\Data\1w\KGE3320\20241106_kge-3320_l5_1w_a_series001_d_series007.ims
280	µm	Surface	Position	271	µm	Surface	Position	10400	µm	Surface	Position	0	112	0	1	CFP	700001	15	CFP	700001	20241106_kge-3320_l5_1w_a_series001_d_series007.ims	S:\AG\AG-Endres\Daten\Gertz-Kronenberg\von Majed\IMARIS\Microfetti\Ki-67 quantification\Data\1w\KGE3320\20241106_kge-3320_l5_1w_a_series001_d_series007.ims
257	µm	Surface	Position	267	µm	Surface	Position	10400	µm	Surface	Position	0	113	0	1	CFP	700001	23	CFP	700001	20241106_kge-3320_l5_1w_a_series001_d_series007.ims	S:\AG\AG-Endres\Daten\Gertz-Kronenberg\von Majed\IMARIS\Microfetti\Ki-67 quantification\Data\1w\KGE3320\20241106_kge-3320_l5_1w_a_series001_d_series007.ims
243	µm	Surface	Position	251	µm	Surface	Position	10400	µm	Surface	Position	0	114	0	1	CFP	700001	25	CFP	700001	20241106_kge-3320_l5_1w_a_series001_d_series007.ims	S:\AG\AG-Endres\Daten\Gertz-Kronenberg\von Majed\IMARIS\Microfetti\Ki-67 quantification\Data\1w\KGE3320\20241106_kge-3320_l5_1w_a_series001_d_series007.ims
273	µm	Surface	Position	201	µm	Surface	Position	10400	µm	Surface	Position	0	115	0	1	CFP	700001	26	CFP	700001	20241106_kge-3320_l5_1w_a_series001_d_series007.ims	S:\AG\AG-Endres\Daten\Gertz-Kronenberg\von Majed\IMARIS\Microfetti\Ki-67 quantification\Data\1w\KGE3320\20241106_kge-3320_l5_1w_a_series001_d_series007.ims
348	µm	Surface	Position	125	µm	Surface	Position	10400	µm	Surface	Position	0	116	0	1	CFP	700001	28	CFP	700001	20241106_kge-3320_l5_1w_a_series001_d_series007.ims	S:\AG\AG-Endres\Daten\Gertz-Kronenberg\von Majed\IMARIS\Microfetti\Ki-67 quantification\Data\1w\KGE3320\20241106_kge-3320_l5_1w_a_series001_d_series007.ims
238	µm	Surface	Position	208	µm	Surface	Position	10400	µm	Surface	Position	0	117	0	1	CFP	700001	34	CFP	700001	20241106_kge-3320_l5_1w_a_series001_d_series007.ims	S:\AG\AG-Endres\Daten\Gertz-Kronenberg\von Majed\IMARIS\Microfetti\Ki-67 quantification\Data\1w\KGE3320\20241106_kge-3320_l5_1w_a_series001_d_series007.ims
249	µm	Surface	Position	211	µm	Surface	Position	10400	µm	Surface	Position	0	118	0	1	CFP	700001	35	CFP	700001	20241106_kge-3320_l5_1w_a_series001_d_series007.ims	S:\AG\AG-Endres\Daten\Gertz-Kronenberg\von Majed\IMARIS\Microfetti\Ki-67 quantification\Data\1w\KGE3320\20241106_kge-3320_l5_1w_a_series001_d_series007.ims
228	µm	Surface	Position	231	µm	Surface	Position	10400	µm	Surface	Position	0	119	0	1	CFP	700001	36	CFP	700001	20241106_kge-3320_l5_1w_a_series001_d_series007.ims	S:\AG\AG-Endres\Daten\Gertz-Kronenberg\von Majed\IMARIS\Microfetti\Ki-67 quantification\Data\1w\KGE3320\20241106_kge-3320_l5_1w_a_series001_d_series007.ims
272	µm	Surface	Position	124	µm	Surface	Position	10400	µm	Surface	Position	0	120	0	1	CFP	700001	38	CFP	700001	20241106_kge-3320_l5_1w_a_series001_d_series007.ims	S:\AG\AG-Endres\Daten\Gertz-Kronenberg\von Majed\IMARIS\Microfetti\Ki-67 quantification\Data\1w\KGE3320\20241106_kge-3320_l5_1w_a_series001_d_series007.ims
277	µm	Surface	Position	145	µm	Surface	Position	10400	µm	Surface	Position	0	121	0	1	CFP	700001	39	CFP	700001	20241106_kge-3320_l5_1w_a_series001_d_series007.ims	S:\AG\AG-Endres\Daten\Gertz-Kronenberg\von Majed\IMARIS\Microfetti\Ki-67 quantification\Data\1w\KGE3320\20241106_kge-3320_l5_1w_a_series001_d_series007.ims
68.4	µm	Surface	Position	364	µm	Surface	Position	10400	µm	Surface	Position	0	122	0	1	CFP	700001	42	CFP	700001	20241106_kge-3320_l5_1w_a_series001_d_series007.ims	S:\AG\AG-Endres\Daten\Gertz-Kronenberg\von Majed\IMARIS\Microfetti\Ki-67 quantification\Data\1w\KGE3320\20241106_kge-3320_l5_1w_a_series001_d_series007.ims
61.6	µm	Surface	Position	367	µm	Surface	Position	10400	µm	Surface	Position	0	123	0	1	CFP	700001	43	CFP	700001	20241106_kge-3320_l5_1w_a_series001_d_series007.ims	S:\AG\AG-Endres\Daten\Gertz-Kronenberg\von Majed\IMARIS\Microfetti\Ki-67 quantification\Data\1w\KGE3320\20241106_kge-3320_l5_1w_a_series001_d_series007.ims
80.6	µm	Surface	Position	360	µm	Surface	Position	10400	µm	Surface	Position	0	124	0	1	CFP	700001	44	CFP	700001	20241106_kge-3320_l5_1w_a_series001_d_series007.ims	S:\AG\AG-Endres\Daten\Gertz-Kronenberg\von Majed\IMARIS\Microfetti\Ki-67 quantification\Data\1w\KGE3320\20241106_kge-3320_l5_1w_a_series001_d_series007.ims
258	µm	Surface	Position	125	µm	Surface	Position	10400	µm	Surface	Position	0	125	0	1	CFP	700001	48	CFP	700001	20241106_kge-3320_l5_1w_a_series001_d_series007.ims	S:\AG\AG-Endres\Daten\Gertz-Kronenberg\von Majed\IMARIS\Microfetti\Ki-67 quantification\Data\1w\KGE3320\20241106_kge-3320_l5_1w_a_series001_d_series007.ims
260	µm	Surface	Position	96.2	µm	Surface	Position	10400	µm	Surface	Position	0	126	0	1	CFP	700001	52	CFP	700001	20241106_kge-3320_l5_1w_a_series001_d_series007.ims	S:\AG\AG-Endres\Daten\Gertz-Kronenberg\von Majed\IMARIS\Microfetti\Ki-67 quantification\Data\1w\KGE3320\20241106_kge-3320_l5_1w_a_series001_d_series007.ims
179	µm	Surface	Position	139	µm	Surface	Position	10400	µm	Surface	Position	0	127	0	1	CFP	700001	55	CFP	700001	20241106_kge-3320_l5_1w_a_series001_d_series007.ims	S:\AG\AG-Endres\Daten\Gertz-Kronenberg\von Majed\IMARIS\Microfetti\Ki-67 quantification\Data\1w\KGE3320\20241106_kge-3320_l5_1w_a_series001_d_series007.ims
152	µm	Surface	Position	112	µm	Surface	Position	10400	µm	Surface	Position	0	128	0	1	CFP	700001	61	CFP	700001	20241106_kge-3320_l5_1w_a_series001_d_series007.ims	S:\AG\AG-Endres\Daten\Gertz-Kronenberg\von Majed\IMARIS\Microfetti\Ki-67 quantification\Data\1w\KGE3320\20241106_kge-3320_l5_1w_a_series001_d_series007.ims
150	µm	Surface	Position	120	µm	Surface	Position	10400	µm	Surface	Position	0	129	0	1	CFP	700001	62	CFP	700001	20241106_kge-3320_l5_1w_a_series001_d_series007.ims	S:\AG\AG-Endres\Daten\Gertz-Kronenberg\von Majed\IMARIS\Microfetti\Ki-67 quantification\Data\1w\KGE3320\20241106_kge-3320_l5_1w_a_series001_d_series007.ims
166	µm	Surface	Position	123	µm	Surface	Position	10400	µm	Surface	Position	0	130	0	1	CFP	700001	66	CFP	700001	20241106_kge-3320_l5_1w_a_series001_d_series007.ims	S:\AG\AG-Endres\Daten\Gertz-Kronenberg\von Majed\IMARIS\Microfetti\Ki-67 quantification\Data\1w\KGE3320\20241106_kge-3320_l5_1w_a_series001_d_series007.ims
158	µm	Surface	Position	97.4	µm	Surface	Position	10400	µm	Surface	Position	0	131	0	1	CFP	700001	68	CFP	700001	20241106_kge-3320_l5_1w_a_series001_d_series007.ims	S:\AG\AG-Endres\Daten\Gertz-Kronenberg\von Majed\IMARIS\Microfetti\Ki-67 quantification\Data\1w\KGE3320\20241106_kge-3320_l5_1w_a_series001_d_series007.ims
107	µm	Surface	Position	92.7	µm	Surface	Position	10400	µm	Surface	Position	0	132	0	1	CFP	700001	71	CFP	700001	20241106_kge-3320_l5_1w_a_series001_d_series007.ims	S:\AG\AG-Endres\Daten\Gertz-Kronenberg\von Majed\IMARIS\Microfetti\Ki-67 quantification\Data\1w\KGE3320\20241106_kge-3320_l5_1w_a_series001_d_series007.ims
101	µm	Surface	Position	101	µm	Surface	Position	10400	µm	Surface	Position	0	133	0	1	CFP	700001	72	CFP	700001	20241106_kge-3320_l5_1w_a_series001_d_series007.ims	S:\AG\AG-Endres\Daten\Gertz-Kronenberg\von Majed\IMARIS\Microfetti\Ki-67 quantification\Data\1w\KGE3320\20241106_kge-3320_l5_1w_a_series001_d_series007.ims
112	µm	Surface	Position	40.2	µm	Surface	Position	10400	µm	Surface	Position	0	134	0	1	CFP	700001	75	CFP	700001	20241106_kge-3320_l5_1w_a_series001_d_series007.ims	S:\AG\AG-Endres\Daten\Gertz-Kronenberg\von Majed\IMARIS\Microfetti\Ki-67 quantification\Data\1w\KGE3320\20241106_kge-3320_l5_1w_a_series001_d_series007.ims
288	µm	Surface	Position	331	µm	Surface	Position	10400	µm	Surface	Position	1	135	0	1	CFP	700001	0	CFP	700001	20241106_kge-3320_l5_1w_a_series001_e_series009.ims	S:\AG\AG-Endres\Daten\Gertz-Kronenberg\von Majed\IMARIS\Microfetti\Ki-67 quantification\Data\1w\KGE3320\20241106_kge-3320_l5_1w_a_series001_e_series009.ims
316	µm	Surface	Position	347	µm	Surface	Position	10400	µm	Surface	Position	0	136	0	1	CFP	700001	3	CFP	700001	20241106_kge-3320_l5_1w_a_series001_e_series009.ims	S:\AG\AG-Endres\Daten\Gertz-Kronenberg\von Majed\IMARIS\Microfetti\Ki-67 quantification\Data\1w\KGE3320\20241106_kge-3320_l5_1w_a_series001_e_series009.ims
340	µm	Surface	Position	348	µm	Surface	Position	10400	µm	Surface	Position	1	137	0	1	CFP	700001	8	CFP	700001	20241106_kge-3320_l5_1w_a_series001_e_series009.ims	S:\AG\AG-Endres\Daten\Gertz-Kronenberg\von Majed\IMARIS\Microfetti\Ki-67 quantification\Data\1w\KGE3320\20241106_kge-3320_l5_1w_a_series001_e_series009.ims
351	µm	Surface	Position	351	µm	Surface	Position	10400	µm	Surface	Position	1	138	0	1	CFP	700001	9	CFP	700001	20241106_kge-3320_l5_1w_a_series001_e_series009.ims	S:\AG\AG-Endres\Daten\Gertz-Kronenberg\von Majed\IMARIS\Microfetti\Ki-67 quantification\Data\1w\KGE3320\20241106_kge-3320_l5_1w_a_series001_e_series009.ims
303	µm	Surface	Position	240	µm	Surface	Position	10400	µm	Surface	Position	0	139	0	1	CFP	700001	11	CFP	700001	20241106_kge-3320_l5_1w_a_series001_e_series009.ims	S:\AG\AG-Endres\Daten\Gertz-Kronenberg\von Majed\IMARIS\Microfetti\Ki-67 quantification\Data\1w\KGE3320\20241106_kge-3320_l5_1w_a_series001_e_series009.ims
297	µm	Surface	Position	257	µm	Surface	Position	10400	µm	Surface	Position	0	140	0	1	CFP	700001	14	CFP	700001	20241106_kge-3320_l5_1w_a_series001_e_series009.ims	S:\AG\AG-Endres\Daten\Gertz-Kronenberg\von Majed\IMARIS\Microfetti\Ki-67 quantification\Data\1w\KGE3320\20241106_kge-3320_l5_1w_a_series001_e_series009.ims
330	µm	Surface	Position	243	µm	Surface	Position	10400	µm	Surface	Position	0	141	0	1	CFP	700001	15	CFP	700001	20241106_kge-3320_l5_1w_a_series001_e_series009.ims	S:\AG\AG-Endres\Daten\Gertz-Kronenberg\von Majed\IMARIS\Microfetti\Ki-67 quantification\Data\1w\KGE3320\20241106_kge-3320_l5_1w_a_series001_e_series009.ims
319	µm	Surface	Position	218	µm	Surface	Position	10400	µm	Surface	Position	0	142	0	1	CFP	700001	19	CFP	700001	20241106_kge-3320_l5_1w_a_series001_e_series009.ims	S:\AG\AG-Endres\Daten\Gertz-Kronenberg\von Majed\IMARIS\Microfetti\Ki-67 quantification\Data\1w\KGE3320\20241106_kge-3320_l5_1w_a_series001_e_series009.ims
362	µm	Surface	Position	148	µm	Surface	Position	10400	µm	Surface	Position	1	143	0	1	CFP	700001	21	CFP	700001	20241106_kge-3320_l5_1w_a_series001_e_series009.ims	S:\AG\AG-Endres\Daten\Gertz-Kronenberg\von Majed\IMARIS\Microfetti\Ki-67 quantification\Data\1w\KGE3320\20241106_kge-3320_l5_1w_a_series001_e_series009.ims
295	µm	Surface	Position	234	µm	Surface	Position	10400	µm	Surface	Position	0	144	0	1	CFP	700001	24	CFP	700001	20241106_kge-3320_l5_1w_a_series001_e_series009.ims	S:\AG\AG-Endres\Daten\Gertz-Kronenberg\von Majed\IMARIS\Microfetti\Ki-67 quantification\Data\1w\KGE3320\20241106_kge-3320_l5_1w_a_series001_e_series009.ims
344	µm	Surface	Position	123	µm	Surface	Position	10400	µm	Surface	Position	0	145	0	1	CFP	700001	26	CFP	700001	20241106_kge-3320_l5_1w_a_series001_e_series009.ims	S:\AG\AG-Endres\Daten\Gertz-Kronenberg\von Majed\IMARIS\Microfetti\Ki-67 quantification\Data\1w\KGE3320\20241106_kge-3320_l5_1w_a_series001_e_series009.ims
352	µm	Surface	Position	85.7	µm	Surface	Position	10400	µm	Surface	Position	0	146	0	1	CFP	700001	28	CFP	700001	20241106_kge-3320_l5_1w_a_series001_e_series009.ims	S:\AG\AG-Endres\Daten\Gertz-Kronenberg\von Majed\IMARIS\Microfetti\Ki-67 quantification\Data\1w\KGE3320\20241106_kge-3320_l5_1w_a_series001_e_series009.ims
219	µm	Surface	Position	215	µm	Surface	Position	10400	µm	Surface	Position	0	147	0	1	CFP	700001	29	CFP	700001	20241106_kge-3320_l5_1w_a_series001_e_series009.ims	S:\AG\AG-Endres\Daten\Gertz-Kronenberg\von Majed\IMARIS\Microfetti\Ki-67 quantification\Data\1w\KGE3320\20241106_kge-3320_l5_1w_a_series001_e_series009.ims
321	µm	Surface	Position	113	µm	Surface	Position	10400	µm	Surface	Position	1	148	0	1	CFP	700001	32	CFP	700001	20241106_kge-3320_l5_1w_a_series001_e_series009.ims	S:\AG\AG-Endres\Daten\Gertz-Kronenberg\von Majed\IMARIS\Microfetti\Ki-67 quantification\Data\1w\KGE3320\20241106_kge-3320_l5_1w_a_series001_e_series009.ims
243	µm	Surface	Position	195	µm	Surface	Position	10400	µm	Surface	Position	0	149	0	1	CFP	700001	33	CFP	700001	20241106_kge-3320_l5_1w_a_series001_e_series009.ims	S:\AG\AG-Endres\Daten\Gertz-Kronenberg\von Majed\IMARIS\Microfetti\Ki-67 quantification\Data\1w\KGE3320\20241106_kge-3320_l5_1w_a_series001_e_series009.ims
336	µm	Surface	Position	99.5	µm	Surface	Position	10400	µm	Surface	Position	1	150	0	1	CFP	700001	36	CFP	700001	20241106_kge-3320_l5_1w_a_series001_e_series009.ims	S:\AG\AG-Endres\Daten\Gertz-Kronenberg\von Majed\IMARIS\Microfetti\Ki-67 quantification\Data\1w\KGE3320\20241106_kge-3320_l5_1w_a_series001_e_series009.ims
236	µm	Surface	Position	172	µm	Surface	Position	10400	µm	Surface	Position	0	151	0	1	CFP	700001	38	CFP	700001	20241106_kge-3320_l5_1w_a_series001_e_series009.ims	S:\AG\AG-Endres\Daten\Gertz-Kronenberg\von Majed\IMARIS\Microfetti\Ki-67 quantification\Data\1w\KGE3320\20241106_kge-3320_l5_1w_a_series001_e_series009.ims
203	µm	Surface	Position	201	µm	Surface	Position	10400	µm	Surface	Position	0	152	0	1	CFP	700001	39	CFP	700001	20241106_kge-3320_l5_1w_a_series001_e_series009.ims	S:\AG\AG-Endres\Daten\Gertz-Kronenberg\von Majed\IMARIS\Microfetti\Ki-67 quantification\Data\1w\KGE3320\20241106_kge-3320_l5_1w_a_series001_e_series009.ims
312	µm	Surface	Position	82.3	µm	Surface	Position	10400	µm	Surface	Position	0	153	0	1	CFP	700001	45	CFP	700001	20241106_kge-3320_l5_1w_a_series001_e_series009.ims	S:\AG\AG-Endres\Daten\Gertz-Kronenberg\von Majed\IMARIS\Microfetti\Ki-67 quantification\Data\1w\KGE3320\20241106_kge-3320_l5_1w_a_series001_e_series009.ims
241	µm	Surface	Position	165	µm	Surface	Position	10400	µm	Surface	Position	0	154	0	1	CFP	700001	47	CFP	700001	20241106_kge-3320_l5_1w_a_series001_e_series009.ims	S:\AG\AG-Endres\Daten\Gertz-Kronenberg\von Majed\IMARIS\Microfetti\Ki-67 quantification\Data\1w\KGE3320\20241106_kge-3320_l5_1w_a_series001_e_series009.ims
78.1	µm	Surface	Position	300	µm	Surface	Position	10400	µm	Surface	Position	0	155	0	1	CFP	700001	51	CFP	700001	20241106_kge-3320_l5_1w_a_series001_e_series009.ims	S:\AG\AG-Endres\Daten\Gertz-Kronenberg\von Majed\IMARIS\Microfetti\Ki-67 quantification\Data\1w\KGE3320\20241106_kge-3320_l5_1w_a_series001_e_series009.ims
308	µm	Surface	Position	73.6	µm	Surface	Position	10400	µm	Surface	Position	0	156	0	1	CFP	700001	53	CFP	700001	20241106_kge-3320_l5_1w_a_series001_e_series009.ims	S:\AG\AG-Endres\Daten\Gertz-Kronenberg\von Majed\IMARIS\Microfetti\Ki-67 quantification\Data\1w\KGE3320\20241106_kge-3320_l5_1w_a_series001_e_series009.ims
321	µm	Surface	Position	68.3	µm	Surface	Position	10400	µm	Surface	Position	0	157	0	1	CFP	700001	54	CFP	700001	20241106_kge-3320_l5_1w_a_series001_e_series009.ims	S:\AG\AG-Endres\Daten\Gertz-Kronenberg\von Majed\IMARIS\Microfetti\Ki-67 quantification\Data\1w\KGE3320\20241106_kge-3320_l5_1w_a_series001_e_series009.ims
224	µm	Surface	Position	134	µm	Surface	Position	10400	µm	Surface	Position	0	158	0	1	CFP	700001	55	CFP	700001	20241106_kge-3320_l5_1w_a_series001_e_series009.ims	S:\AG\AG-Endres\Daten\Gertz-Kronenberg\von Majed\IMARIS\Microfetti\Ki-67 quantification\Data\1w\KGE3320\20241106_kge-3320_l5_1w_a_series001_e_series009.ims
231	µm	Surface	Position	150	µm	Surface	Position	10400	µm	Surface	Position	1	159	0	1	CFP	700001	56	CFP	700001	20241106_kge-3320_l5_1w_a_series001_e_series009.ims	S:\AG\AG-Endres\Daten\Gertz-Kronenberg\von Majed\IMARIS\Microfetti\Ki-67 quantification\Data\1w\KGE3320\20241106_kge-3320_l5_1w_a_series001_e_series009.ims
128	µm	Surface	Position	191	µm	Surface	Position	10400	µm	Surface	Position	0	160	0	1	CFP	700001	57	CFP	700001	20241106_kge-3320_l5_1w_a_series001_e_series009.ims	S:\AG\AG-Endres\Daten\Gertz-Kronenberg\von Majed\IMARIS\Microfetti\Ki-67 quantification\Data\1w\KGE3320\20241106_kge-3320_l5_1w_a_series001_e_series009.ims
299	µm	Surface	Position	48.4	µm	Surface	Position	10400	µm	Surface	Position	0	161	0	1	CFP	700001	58	CFP	700001	20241106_kge-3320_l5_1w_a_series001_e_series009.ims	S:\AG\AG-Endres\Daten\Gertz-Kronenberg\von Majed\IMARIS\Microfetti\Ki-67 quantification\Data\1w\KGE3320\20241106_kge-3320_l5_1w_a_series001_e_series009.ims
306	µm	Surface	Position	62	µm	Surface	Position	10400	µm	Surface	Position	0	162	0	1	CFP	700001	61	CFP	700001	20241106_kge-3320_l5_1w_a_series001_e_series009.ims	S:\AG\AG-Endres\Daten\Gertz-Kronenberg\von Majed\IMARIS\Microfetti\Ki-67 quantification\Data\1w\KGE3320\20241106_kge-3320_l5_1w_a_series001_e_series009.ims
117	µm	Surface	Position	170	µm	Surface	Position	10400	µm	Surface	Position	0	163	0	1	CFP	700001	67	CFP	700001	20241106_kge-3320_l5_1w_a_series001_e_series009.ims	S:\AG\AG-Endres\Daten\Gertz-Kronenberg\von Majed\IMARIS\Microfetti\Ki-67 quantification\Data\1w\KGE3320\20241106_kge-3320_l5_1w_a_series001_e_series009.ims
234	µm	Surface	Position	58.2	µm	Surface	Position	10400	µm	Surface	Position	0	164	0	1	CFP	700001	68	CFP	700001	20241106_kge-3320_l5_1w_a_series001_e_series009.ims	S:\AG\AG-Endres\Daten\Gertz-Kronenberg\von Majed\IMARIS\Microfetti\Ki-67 quantification\Data\1w\KGE3320\20241106_kge-3320_l5_1w_a_series001_e_series009.ims
125	µm	Surface	Position	165	µm	Surface	Position	10400	µm	Surface	Position	0	165	0	1	CFP	700001	69	CFP	700001	20241106_kge-3320_l5_1w_a_series001_e_series009.ims	S:\AG\AG-Endres\Daten\Gertz-Kronenberg\von Majed\IMARIS\Microfetti\Ki-67 quantification\Data\1w\KGE3320\20241106_kge-3320_l5_1w_a_series001_e_series009.ims
126	µm	Surface	Position	164	µm	Surface	Position	10400	µm	Surface	Position	0	166	0	1	CFP	700001	70	CFP	700001	20241106_kge-3320_l5_1w_a_series001_e_series009.ims	S:\AG\AG-Endres\Daten\Gertz-Kronenberg\von Majed\IMARIS\Microfetti\Ki-67 quantification\Data\1w\KGE3320\20241106_kge-3320_l5_1w_a_series001_e_series009.ims
272	µm	Surface	Position	39.7	µm	Surface	Position	10400	µm	Surface	Position	1	167	0	1	CFP	700001	74	CFP	700001	20241106_kge-3320_l5_1w_a_series001_e_series009.ims	S:\AG\AG-Endres\Daten\Gertz-Kronenberg\von Majed\IMARIS\Microfetti\Ki-67 quantification\Data\1w\KGE3320\20241106_kge-3320_l5_1w_a_series001_e_series009.ims
268	µm	Surface	Position	49.1	µm	Surface	Position	10400	µm	Surface	Position	0	168	0	1	CFP	700001	75	CFP	700001	20241106_kge-3320_l5_1w_a_series001_e_series009.ims	S:\AG\AG-Endres\Daten\Gertz-Kronenberg\von Majed\IMARIS\Microfetti\Ki-67 quantification\Data\1w\KGE3320\20241106_kge-3320_l5_1w_a_series001_e_series009.ims
142	µm	Surface	Position	172	µm	Surface	Position	10400	µm	Surface	Position	0	169	0	1	CFP	700001	77	CFP	700001	20241106_kge-3320_l5_1w_a_series001_e_series009.ims	S:\AG\AG-Endres\Daten\Gertz-Kronenberg\von Majed\IMARIS\Microfetti\Ki-67 quantification\Data\1w\KGE3320\20241106_kge-3320_l5_1w_a_series001_e_series009.ims
206	µm	Surface	Position	2.08	µm	Surface	Position	10400	µm	Surface	Position	0	170	0	1	CFP	700001	84	CFP	700001	20241106_kge-3320_l5_1w_a_series001_e_series009.ims	S:\AG\AG-Endres\Daten\Gertz-Kronenberg\von Majed\IMARIS\Microfetti\Ki-67 quantification\Data\1w\KGE3320\20241106_kge-3320_l5_1w_a_series001_e_series009.ims
218	µm	Surface	Position	4.11	µm	Surface	Position	10400	µm	Surface	Position	0	171	0	1	CFP	700001	85	CFP	700001	20241106_kge-3320_l5_1w_a_series001_e_series009.ims	S:\AG\AG-Endres\Daten\Gertz-Kronenberg\von Majed\IMARIS\Microfetti\Ki-67 quantification\Data\1w\KGE3320\20241106_kge-3320_l5_1w_a_series001_e_series009.ims
67.1	µm	Surface	Position	73.5	µm	Surface	Position	10400	µm	Surface	Position	0	172	0	1	CFP	700001	86	CFP	700001	20241106_kge-3320_l5_1w_a_series001_e_series009.ims	S:\AG\AG-Endres\Daten\Gertz-Kronenberg\von Majed\IMARIS\Microfetti\Ki-67 quantification\Data\1w\KGE3320\20241106_kge-3320_l5_1w_a_series001_e_series009.ims
71.5	µm	Surface	Position	93	µm	Surface	Position	10400	µm	Surface	Position	0	173	0	1	CFP	700001	87	CFP	700001	20241106_kge-3320_l5_1w_a_series001_e_series009.ims	S:\AG\AG-Endres\Daten\Gertz-Kronenberg\von Majed\IMARIS\Microfetti\Ki-67 quantification\Data\1w\KGE3320\20241106_kge-3320_l5_1w_a_series001_e_series009.ims
60.5	µm	Surface	Position	137	µm	Surface	Position	10400	µm	Surface	Position	0	174	0	1	CFP	700001	90	CFP	700001	20241106_kge-3320_l5_1w_a_series001_e_series009.ims	S:\AG\AG-Endres\Daten\Gertz-Kronenberg\von Majed\IMARIS\Microfetti\Ki-67 quantification\Data\1w\KGE3320\20241106_kge-3320_l5_1w_a_series001_e_series009.ims
352	µm	Surface	Position	260	µm	Surface	Position	10400	µm	Surface	Position	0	175	0	1	CFP	700001	0	CFP	700001	20241106_kge-3320_l5_1w_a_series001_f_series011.ims	S:\AG\AG-Endres\Daten\Gertz-Kronenberg\von Majed\IMARIS\Microfetti\Ki-67 quantification\Data\1w\KGE3320\20241106_kge-3320_l5_1w_a_series001_f_series011.ims
294	µm	Surface	Position	332	µm	Surface	Position	10400	µm	Surface	Position	1	176	0	1	CFP	700001	1	CFP	700001	20241106_kge-3320_l5_1w_a_series001_f_series011.ims	S:\AG\AG-Endres\Daten\Gertz-Kronenberg\von Majed\IMARIS\Microfetti\Ki-67 quantification\Data\1w\KGE3320\20241106_kge-3320_l5_1w_a_series001_f_series011.ims
356	µm	Surface	Position	286	µm	Surface	Position	10400	µm	Surface	Position	0	177	0	1	CFP	700001	2	CFP	700001	20241106_kge-3320_l5_1w_a_series001_f_series011.ims	S:\AG\AG-Endres\Daten\Gertz-Kronenberg\von Majed\IMARIS\Microfetti\Ki-67 quantification\Data\1w\KGE3320\20241106_kge-3320_l5_1w_a_series001_f_series011.ims
296	µm	Surface	Position	350	µm	Surface	Position	10400	µm	Surface	Position	1	178	0	1	CFP	700001	3	CFP	700001	20241106_kge-3320_l5_1w_a_series001_f_series011.ims	S:\AG\AG-Endres\Daten\Gertz-Kronenberg\von Majed\IMARIS\Microfetti\Ki-67 quantification\Data\1w\KGE3320\20241106_kge-3320_l5_1w_a_series001_f_series011.ims
364	µm	Surface	Position	303	µm	Surface	Position	10400	µm	Surface	Position	0	179	0	1	CFP	700001	4	CFP	700001	20241106_kge-3320_l5_1w_a_series001_f_series011.ims	S:\AG\AG-Endres\Daten\Gertz-Kronenberg\von Majed\IMARIS\Microfetti\Ki-67 quantification\Data\1w\KGE3320\20241106_kge-3320_l5_1w_a_series001_f_series011.ims
367	µm	Surface	Position	197	µm	Surface	Position	10400	µm	Surface	Position	0	180	0	1	CFP	700001	5	CFP	700001	20241106_kge-3320_l5_1w_a_series001_f_series011.ims	S:\AG\AG-Endres\Daten\Gertz-Kronenberg\von Majed\IMARIS\Microfetti\Ki-67 quantification\Data\1w\KGE3320\20241106_kge-3320_l5_1w_a_series001_f_series011.ims
349	µm	Surface	Position	222	µm	Surface	Position	10400	µm	Surface	Position	0	181	0	1	CFP	700001	6	CFP	700001	20241106_kge-3320_l5_1w_a_series001_f_series011.ims	S:\AG\AG-Endres\Daten\Gertz-Kronenberg\von Majed\IMARIS\Microfetti\Ki-67 quantification\Data\1w\KGE3320\20241106_kge-3320_l5_1w_a_series001_f_series011.ims
290	µm	Surface	Position	295	µm	Surface	Position	10400	µm	Surface	Position	0	182	0	1	CFP	700001	7	CFP	700001	20241106_kge-3320_l5_1w_a_series001_f_series011.ims	S:\AG\AG-Endres\Daten\Gertz-Kronenberg\von Majed\IMARIS\Microfetti\Ki-67 quantification\Data\1w\KGE3320\20241106_kge-3320_l5_1w_a_series001_f_series011.ims
280	µm	Surface	Position	313	µm	Surface	Position	10400	µm	Surface	Position	0	183	0	1	CFP	700001	8	CFP	700001	20241106_kge-3320_l5_1w_a_series001_f_series011.ims	S:\AG\AG-Endres\Daten\Gertz-Kronenberg\von Majed\IMARIS\Microfetti\Ki-67 quantification\Data\1w\KGE3320\20241106_kge-3320_l5_1w_a_series001_f_series011.ims
304	µm	Surface	Position	274	µm	Surface	Position	10400	µm	Surface	Position	0	184	0	1	CFP	700001	9	CFP	700001	20241106_kge-3320_l5_1w_a_series001_f_series011.ims	S:\AG\AG-Endres\Daten\Gertz-Kronenberg\von Majed\IMARIS\Microfetti\Ki-67 quantification\Data\1w\KGE3320\20241106_kge-3320_l5_1w_a_series001_f_series011.ims
239	µm	Surface	Position	363	µm	Surface	Position	10400	µm	Surface	Position	0	185	0	1	CFP	700001	13	CFP	700001	20241106_kge-3320_l5_1w_a_series001_f_series011.ims	S:\AG\AG-Endres\Daten\Gertz-Kronenberg\von Majed\IMARIS\Microfetti\Ki-67 quantification\Data\1w\KGE3320\20241106_kge-3320_l5_1w_a_series001_f_series011.ims
319	µm	Surface	Position	223	µm	Surface	Position	10400	µm	Surface	Position	0	186	0	1	CFP	700001	14	CFP	700001	20241106_kge-3320_l5_1w_a_series001_f_series011.ims	S:\AG\AG-Endres\Daten\Gertz-Kronenberg\von Majed\IMARIS\Microfetti\Ki-67 quantification\Data\1w\KGE3320\20241106_kge-3320_l5_1w_a_series001_f_series011.ims
192	µm	Surface	Position	305	µm	Surface	Position	10400	µm	Surface	Position	0	187	0	1	CFP	700001	16	CFP	700001	20241106_kge-3320_l5_1w_a_series001_f_series011.ims	S:\AG\AG-Endres\Daten\Gertz-Kronenberg\von Majed\IMARIS\Microfetti\Ki-67 quantification\Data\1w\KGE3320\20241106_kge-3320_l5_1w_a_series001_f_series011.ims
262	µm	Surface	Position	255	µm	Surface	Position	10400	µm	Surface	Position	0	188	0	1	CFP	700001	18	CFP	700001	20241106_kge-3320_l5_1w_a_series001_f_series011.ims	S:\AG\AG-Endres\Daten\Gertz-Kronenberg\von Majed\IMARIS\Microfetti\Ki-67 quantification\Data\1w\KGE3320\20241106_kge-3320_l5_1w_a_series001_f_series011.ims
263	µm	Surface	Position	241	µm	Surface	Position	10400	µm	Surface	Position	0	189	0	1	CFP	700001	19	CFP	700001	20241106_kge-3320_l5_1w_a_series001_f_series011.ims	S:\AG\AG-Endres\Daten\Gertz-Kronenberg\von Majed\IMARIS\Microfetti\Ki-67 quantification\Data\1w\KGE3320\20241106_kge-3320_l5_1w_a_series001_f_series011.ims
323	µm	Surface	Position	195	µm	Surface	Position	10400	µm	Surface	Position	0	190	0	1	CFP	700001	21	CFP	700001	20241106_kge-3320_l5_1w_a_series001_f_series011.ims	S:\AG\AG-Endres\Daten\Gertz-Kronenberg\von Majed\IMARIS\Microfetti\Ki-67 quantification\Data\1w\KGE3320\20241106_kge-3320_l5_1w_a_series001_f_series011.ims
197	µm	Surface	Position	324	µm	Surface	Position	10400	µm	Surface	Position	0	191	0	1	CFP	700001	22	CFP	700001	20241106_kge-3320_l5_1w_a_series001_f_series011.ims	S:\AG\AG-Endres\Daten\Gertz-Kronenberg\von Majed\IMARIS\Microfetti\Ki-67 quantification\Data\1w\KGE3320\20241106_kge-3320_l5_1w_a_series001_f_series011.ims
94.4	µm	Surface	Position	322	µm	Surface	Position	10400	µm	Surface	Position	0	192	0	1	CFP	700001	25	CFP	700001	20241106_kge-3320_l5_1w_a_series001_f_series011.ims	S:\AG\AG-Endres\Daten\Gertz-Kronenberg\von Majed\IMARIS\Microfetti\Ki-67 quantification\Data\1w\KGE3320\20241106_kge-3320_l5_1w_a_series001_f_series011.ims
62	µm	Surface	Position	344	µm	Surface	Position	10400	µm	Surface	Position	0	193	0	1	CFP	700001	27	CFP	700001	20241106_kge-3320_l5_1w_a_series001_f_series011.ims	S:\AG\AG-Endres\Daten\Gertz-Kronenberg\von Majed\IMARIS\Microfetti\Ki-67 quantification\Data\1w\KGE3320\20241106_kge-3320_l5_1w_a_series001_f_series011.ims
81	µm	Surface	Position	327	µm	Surface	Position	10400	µm	Surface	Position	0	194	0	1	CFP	700001	28	CFP	700001	20241106_kge-3320_l5_1w_a_series001_f_series011.ims	S:\AG\AG-Endres\Daten\Gertz-Kronenberg\von Majed\IMARIS\Microfetti\Ki-67 quantification\Data\1w\KGE3320\20241106_kge-3320_l5_1w_a_series001_f_series011.ims
90	µm	Surface	Position	338	µm	Surface	Position	10400	µm	Surface	Position	0	195	0	1	CFP	700001	29	CFP	700001	20241106_kge-3320_l5_1w_a_series001_f_series011.ims	S:\AG\AG-Endres\Daten\Gertz-Kronenberg\von Majed\IMARIS\Microfetti\Ki-67 quantification\Data\1w\KGE3320\20241106_kge-3320_l5_1w_a_series001_f_series011.ims
47.9	µm	Surface	Position	327	µm	Surface	Position	10400	µm	Surface	Position	0	196	0	1	CFP	700001	30	CFP	700001	20241106_kge-3320_l5_1w_a_series001_f_series011.ims	S:\AG\AG-Endres\Daten\Gertz-Kronenberg\von Majed\IMARIS\Microfetti\Ki-67 quantification\Data\1w\KGE3320\20241106_kge-3320_l5_1w_a_series001_f_series011.ims
68.5	µm	Surface	Position	254	µm	Surface	Position	10400	µm	Surface	Position	0	197	0	1	CFP	700001	31	CFP	700001	20241106_kge-3320_l5_1w_a_series001_f_series011.ims	S:\AG\AG-Endres\Daten\Gertz-Kronenberg\von Majed\IMARIS\Microfetti\Ki-67 quantification\Data\1w\KGE3320\20241106_kge-3320_l5_1w_a_series001_f_series011.ims
74.2	µm	Surface	Position	249	µm	Surface	Position	10400	µm	Surface	Position	0	198	0	1	CFP	700001	32	CFP	700001	20241106_kge-3320_l5_1w_a_series001_f_series011.ims	S:\AG\AG-Endres\Daten\Gertz-Kronenberg\von Majed\IMARIS\Microfetti\Ki-67 quantification\Data\1w\KGE3320\20241106_kge-3320_l5_1w_a_series001_f_series011.ims
40.5	µm	Surface	Position	258	µm	Surface	Position	10400	µm	Surface	Position	0	199	0	1	CFP	700001	35	CFP	700001	20241106_kge-3320_l5_1w_a_series001_f_series011.ims	S:\AG\AG-Endres\Daten\Gertz-Kronenberg\von Majed\IMARIS\Microfetti\Ki-67 quantification\Data\1w\KGE3320\20241106_kge-3320_l5_1w_a_series001_f_series011.ims
63.4	µm	Surface	Position	242	µm	Surface	Position	10400	µm	Surface	Position	0	200	0	1	CFP	700001	36	CFP	700001	20241106_kge-3320_l5_1w_a_series001_f_series011.ims	S:\AG\AG-Endres\Daten\Gertz-Kronenberg\von Majed\IMARIS\Microfetti\Ki-67 quantification\Data\1w\KGE3320\20241106_kge-3320_l5_1w_a_series001_f_series011.ims
56.9	µm	Surface	Position	146	µm	Surface	Position	10400	µm	Surface	Position	1	201	0	1	CFP	700001	37	CFP	700001	20241106_kge-3320_l5_1w_a_series001_f_series011.ims	S:\AG\AG-Endres\Daten\Gertz-Kronenberg\von Majed\IMARIS\Microfetti\Ki-67 quantification\Data\1w\KGE3320\20241106_kge-3320_l5_1w_a_series001_f_series011.ims
49.9	µm	Surface	Position	157	µm	Surface	Position	10400	µm	Surface	Position	0	202	0	1	CFP	700001	38	CFP	700001	20241106_kge-3320_l5_1w_a_series001_f_series011.ims	S:\AG\AG-Endres\Daten\Gertz-Kronenberg\von Majed\IMARIS\Microfetti\Ki-67 quantification\Data\1w\KGE3320\20241106_kge-3320_l5_1w_a_series001_f_series011.ims
63.5	µm	Surface	Position	169	µm	Surface	Position	10400	µm	Surface	Position	1	203	0	1	CFP	700001	39	CFP	700001	20241106_kge-3320_l5_1w_a_series001_f_series011.ims	S:\AG\AG-Endres\Daten\Gertz-Kronenberg\von Majed\IMARIS\Microfetti\Ki-67 quantification\Data\1w\KGE3320\20241106_kge-3320_l5_1w_a_series001_f_series011.ims
25	µm	Surface	Position	200	µm	Surface	Position	10400	µm	Surface	Position	0	204	0	1	CFP	700001	40	CFP	700001	20241106_kge-3320_l5_1w_a_series001_f_series011.ims	S:\AG\AG-Endres\Daten\Gertz-Kronenberg\von Majed\IMARIS\Microfetti\Ki-67 quantification\Data\1w\KGE3320\20241106_kge-3320_l5_1w_a_series001_f_series011.ims
32.1	µm	Surface	Position	140	µm	Surface	Position	10400	µm	Surface	Position	0	205	0	1	CFP	700001	41	CFP	700001	20241106_kge-3320_l5_1w_a_series001_f_series011.ims	S:\AG\AG-Endres\Daten\Gertz-Kronenberg\von Majed\IMARIS\Microfetti\Ki-67 quantification\Data\1w\KGE3320\20241106_kge-3320_l5_1w_a_series001_f_series011.ims
60.9	µm	Surface	Position	61.8	µm	Surface	Position	10400	µm	Surface	Position	0	206	0	1	CFP	700001	42	CFP	700001	20241106_kge-3320_l5_1w_a_series001_f_series011.ims	S:\AG\AG-Endres\Daten\Gertz-Kronenberg\von Majed\IMARIS\Microfetti\Ki-67 quantification\Data\1w\KGE3320\20241106_kge-3320_l5_1w_a_series001_f_series011.ims
27.7	µm	Surface	Position	353	µm	Surface	Position	10400	µm	Surface	Position	0	207	0	1	CFP	700001	1	CFP	700001	20241106_kge-3321_l5_1w_a_series001_a_series001.ims	S:\AG\AG-Endres\Daten\Gertz-Kronenberg\von Majed\IMARIS\Microfetti\Ki-67 quantification\Data\1w\KGE3321\20241106_kge-3321_l5_1w_a_series001_a_series001.ims
8.49	µm	Surface	Position	360	µm	Surface	Position	10400	µm	Surface	Position	0	208	0	1	CFP	700001	2	CFP	700001	20241106_kge-3321_l5_1w_a_series001_a_series001.ims	S:\AG\AG-Endres\Daten\Gertz-Kronenberg\von Majed\IMARIS\Microfetti\Ki-67 quantification\Data\1w\KGE3321\20241106_kge-3321_l5_1w_a_series001_a_series001.ims
128	µm	Surface	Position	214	µm	Surface	Position	10400	µm	Surface	Position	0	209	0	1	CFP	700001	3	CFP	700001	20241106_kge-3321_l5_1w_a_series001_a_series001.ims	S:\AG\AG-Endres\Daten\Gertz-Kronenberg\von Majed\IMARIS\Microfetti\Ki-67 quantification\Data\1w\KGE3321\20241106_kge-3321_l5_1w_a_series001_a_series001.ims
279	µm	Surface	Position	45.2	µm	Surface	Position	10400	µm	Surface	Position	0	210	0	1	CFP	700001	4	CFP	700001	20241106_kge-3321_l5_1w_a_series001_a_series001.ims	S:\AG\AG-Endres\Daten\Gertz-Kronenberg\von Majed\IMARIS\Microfetti\Ki-67 quantification\Data\1w\KGE3321\20241106_kge-3321_l5_1w_a_series001_a_series001.ims
259	µm	Surface	Position	29.7	µm	Surface	Position	10400	µm	Surface	Position	0	211	0	1	CFP	700001	6	CFP	700001	20241106_kge-3321_l5_1w_a_series001_a_series001.ims	S:\AG\AG-Endres\Daten\Gertz-Kronenberg\von Majed\IMARIS\Microfetti\Ki-67 quantification\Data\1w\KGE3321\20241106_kge-3321_l5_1w_a_series001_a_series001.ims
275	µm	Surface	Position	14.4	µm	Surface	Position	10400	µm	Surface	Position	0	212	0	1	CFP	700001	9	CFP	700001	20241106_kge-3321_l5_1w_a_series001_a_series001.ims	S:\AG\AG-Endres\Daten\Gertz-Kronenberg\von Majed\IMARIS\Microfetti\Ki-67 quantification\Data\1w\KGE3321\20241106_kge-3321_l5_1w_a_series001_a_series001.ims
269	µm	Surface	Position	38.8	µm	Surface	Position	10400	µm	Surface	Position	0	213	0	1	CFP	700001	10	CFP	700001	20241106_kge-3321_l5_1w_a_series001_a_series001.ims	S:\AG\AG-Endres\Daten\Gertz-Kronenberg\von Majed\IMARIS\Microfetti\Ki-67 quantification\Data\1w\KGE3321\20241106_kge-3321_l5_1w_a_series001_a_series001.ims
241	µm	Surface	Position	8.21	µm	Surface	Position	10400	µm	Surface	Position	0	214	0	1	CFP	700001	14	CFP	700001	20241106_kge-3321_l5_1w_a_series001_a_series001.ims	S:\AG\AG-Endres\Daten\Gertz-Kronenberg\von Majed\IMARIS\Microfetti\Ki-67 quantification\Data\1w\KGE3321\20241106_kge-3321_l5_1w_a_series001_a_series001.ims
258	µm	Surface	Position	14.7	µm	Surface	Position	10400	µm	Surface	Position	0	215	0	1	CFP	700001	15	CFP	700001	20241106_kge-3321_l5_1w_a_series001_a_series001.ims	S:\AG\AG-Endres\Daten\Gertz-Kronenberg\von Majed\IMARIS\Microfetti\Ki-67 quantification\Data\1w\KGE3321\20241106_kge-3321_l5_1w_a_series001_a_series001.ims
42.8	µm	Surface	Position	155	µm	Surface	Position	10400	µm	Surface	Position	0	216	0	1	CFP	700001	17	CFP	700001	20241106_kge-3321_l5_1w_a_series001_a_series001.ims	S:\AG\AG-Endres\Daten\Gertz-Kronenberg\von Majed\IMARIS\Microfetti\Ki-67 quantification\Data\1w\KGE3321\20241106_kge-3321_l5_1w_a_series001_a_series001.ims
173	µm	Surface	Position	6.66	µm	Surface	Position	10400	µm	Surface	Position	1	217	0	1	CFP	700001	20	CFP	700001	20241106_kge-3321_l5_1w_a_series001_a_series001.ims	S:\AG\AG-Endres\Daten\Gertz-Kronenberg\von Majed\IMARIS\Microfetti\Ki-67 quantification\Data\1w\KGE3321\20241106_kge-3321_l5_1w_a_series001_a_series001.ims
31.7	µm	Surface	Position	163	µm	Surface	Position	10400	µm	Surface	Position	0	218	0	1	CFP	700001	21	CFP	700001	20241106_kge-3321_l5_1w_a_series001_a_series001.ims	S:\AG\AG-Endres\Daten\Gertz-Kronenberg\von Majed\IMARIS\Microfetti\Ki-67 quantification\Data\1w\KGE3321\20241106_kge-3321_l5_1w_a_series001_a_series001.ims
76.2	µm	Surface	Position	49.9	µm	Surface	Position	10400	µm	Surface	Position	1	219	0	1	CFP	700001	23	CFP	700001	20241106_kge-3321_l5_1w_a_series001_a_series001.ims	S:\AG\AG-Endres\Daten\Gertz-Kronenberg\von Majed\IMARIS\Microfetti\Ki-67 quantification\Data\1w\KGE3321\20241106_kge-3321_l5_1w_a_series001_a_series001.ims
59.1	µm	Surface	Position	62	µm	Surface	Position	10400	µm	Surface	Position	1	220	0	1	CFP	700001	24	CFP	700001	20241106_kge-3321_l5_1w_a_series001_a_series001.ims	S:\AG\AG-Endres\Daten\Gertz-Kronenberg\von Majed\IMARIS\Microfetti\Ki-67 quantification\Data\1w\KGE3321\20241106_kge-3321_l5_1w_a_series001_a_series001.ims
63.9	µm	Surface	Position	31.1	µm	Surface	Position	10400	µm	Surface	Position	1	221	0	1	CFP	700001	26	CFP	700001	20241106_kge-3321_l5_1w_a_series001_a_series001.ims	S:\AG\AG-Endres\Daten\Gertz-Kronenberg\von Majed\IMARIS\Microfetti\Ki-67 quantification\Data\1w\KGE3321\20241106_kge-3321_l5_1w_a_series001_a_series001.ims
66	µm	Surface	Position	55.3	µm	Surface	Position	10400	µm	Surface	Position	1	222	0	1	CFP	700001	38	CFP	700001	20241106_kge-3321_l5_1w_a_series001_a_series001.ims	S:\AG\AG-Endres\Daten\Gertz-Kronenberg\von Majed\IMARIS\Microfetti\Ki-67 quantification\Data\1w\KGE3321\20241106_kge-3321_l5_1w_a_series001_a_series001.ims
253	µm	Surface	Position	331	µm	Surface	Position	10400	µm	Surface	Position	0	223	0	1	CFP	700001	0	CFP	700001	20241106_kge-3321_l5_1w_a_series001_b_series003.ims	S:\AG\AG-Endres\Daten\Gertz-Kronenberg\von Majed\IMARIS\Microfetti\Ki-67 quantification\Data\1w\KGE3321\20241106_kge-3321_l5_1w_a_series001_b_series003.ims
244	µm	Surface	Position	310	µm	Surface	Position	10400	µm	Surface	Position	0	224	0	1	CFP	700001	3	CFP	700001	20241106_kge-3321_l5_1w_a_series001_b_series003.ims	S:\AG\AG-Endres\Daten\Gertz-Kronenberg\von Majed\IMARIS\Microfetti\Ki-67 quantification\Data\1w\KGE3321\20241106_kge-3321_l5_1w_a_series001_b_series003.ims
305	µm	Surface	Position	263	µm	Surface	Position	10400	µm	Surface	Position	0	225	0	1	CFP	700001	4	CFP	700001	20241106_kge-3321_l5_1w_a_series001_b_series003.ims	S:\AG\AG-Endres\Daten\Gertz-Kronenberg\von Majed\IMARIS\Microfetti\Ki-67 quantification\Data\1w\KGE3321\20241106_kge-3321_l5_1w_a_series001_b_series003.ims
259	µm	Surface	Position	231	µm	Surface	Position	10400	µm	Surface	Position	0	226	0	1	CFP	700001	5	CFP	700001	20241106_kge-3321_l5_1w_a_series001_b_series003.ims	S:\AG\AG-Endres\Daten\Gertz-Kronenberg\von Majed\IMARIS\Microfetti\Ki-67 quantification\Data\1w\KGE3321\20241106_kge-3321_l5_1w_a_series001_b_series003.ims
361	µm	Surface	Position	97.5	µm	Surface	Position	10400	µm	Surface	Position	1	227	0	1	CFP	700001	8	CFP	700001	20241106_kge-3321_l5_1w_a_series001_b_series003.ims	S:\AG\AG-Endres\Daten\Gertz-Kronenberg\von Majed\IMARIS\Microfetti\Ki-67 quantification\Data\1w\KGE3321\20241106_kge-3321_l5_1w_a_series001_b_series003.ims
156	µm	Surface	Position	295	µm	Surface	Position	10400	µm	Surface	Position	0	228	0	1	CFP	700001	9	CFP	700001	20241106_kge-3321_l5_1w_a_series001_b_series003.ims	S:\AG\AG-Endres\Daten\Gertz-Kronenberg\von Majed\IMARIS\Microfetti\Ki-67 quantification\Data\1w\KGE3321\20241106_kge-3321_l5_1w_a_series001_b_series003.ims
40.8	µm	Surface	Position	353	µm	Surface	Position	10400	µm	Surface	Position	1	229	0	1	CFP	700001	12	CFP	700001	20241106_kge-3321_l5_1w_a_series001_b_series003.ims	S:\AG\AG-Endres\Daten\Gertz-Kronenberg\von Majed\IMARIS\Microfetti\Ki-67 quantification\Data\1w\KGE3321\20241106_kge-3321_l5_1w_a_series001_b_series003.ims
[truncated: 6,335 more rows]

[truncated: 1 more sheets: Supplementary Fig. 5]
